# Supplementary material for: Instability in NAD+ metabolism leads to impaired cardiac mitochondrial function and communication
Source: eLife journal article supplement (doi:10.7554/elife.59828), 2021-08-03
Supplement: data4 [file elife-59828-data4-v1.pdf]

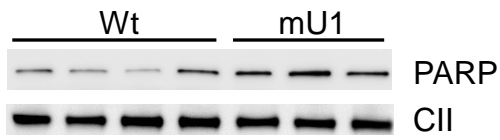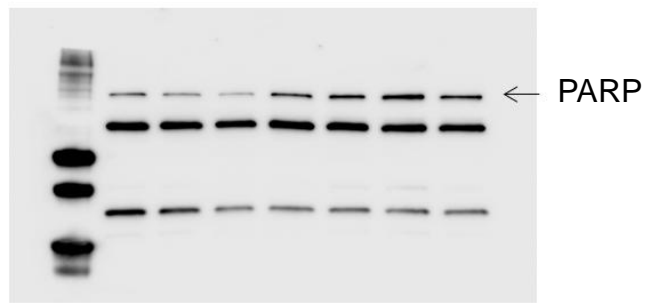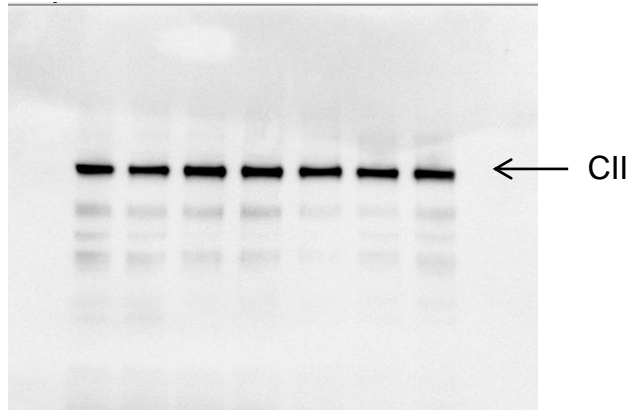

Fig 1A

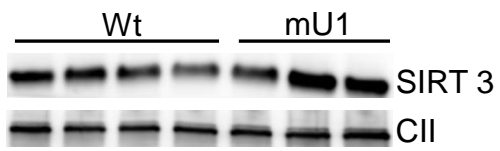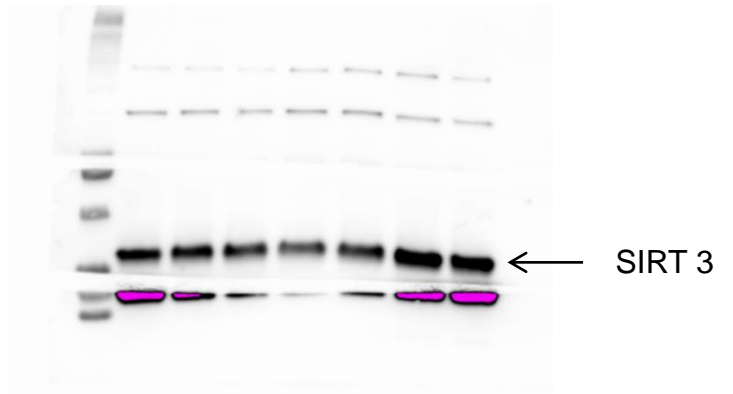

(Blot was cut in two)

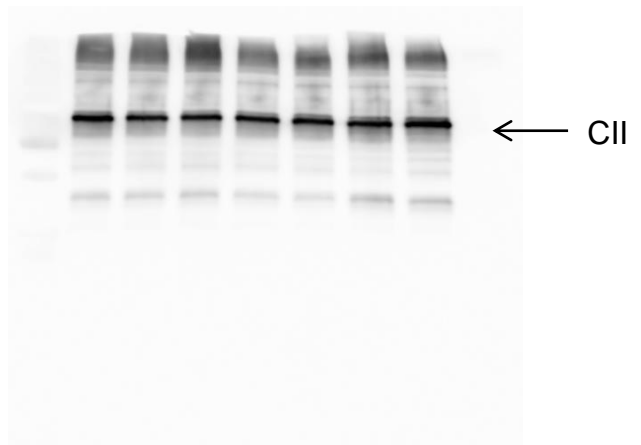

Fig 1D

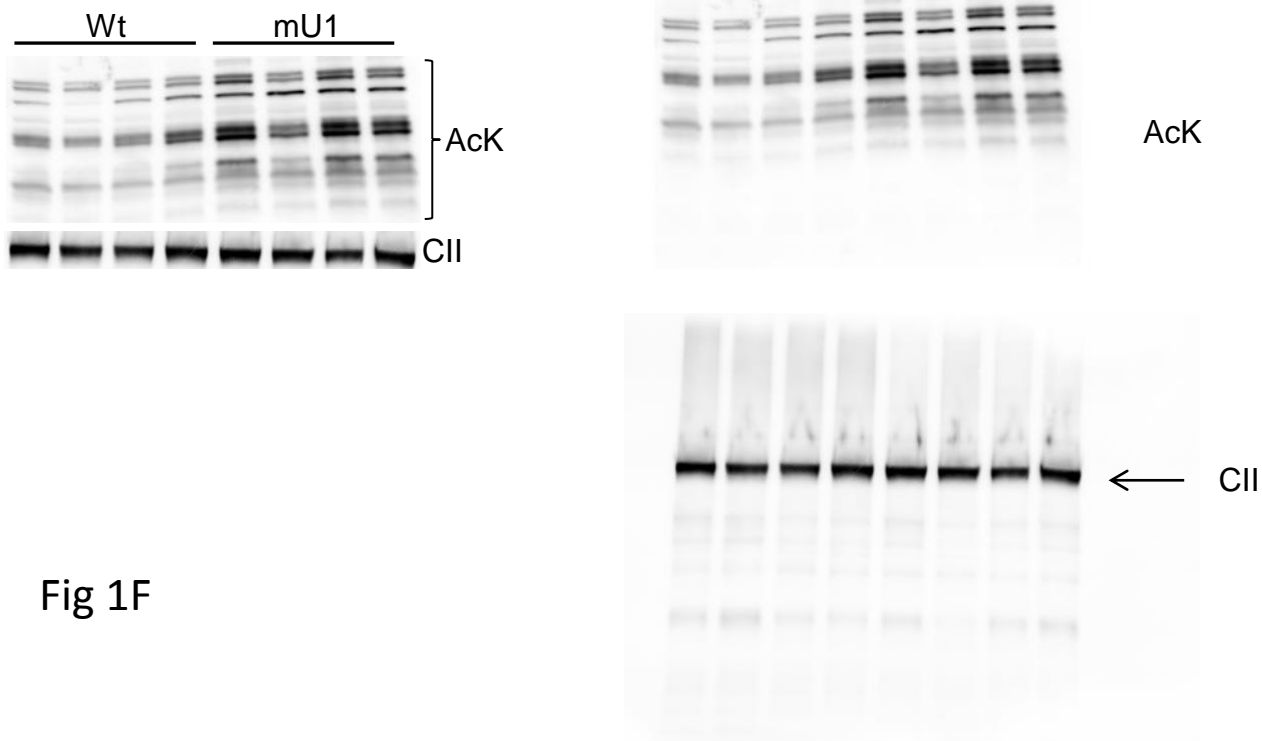

Fig 1F

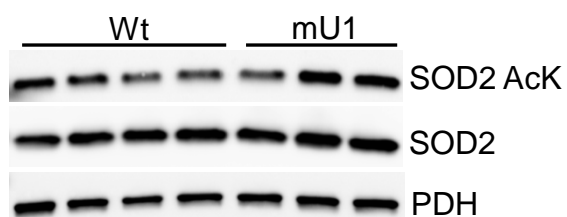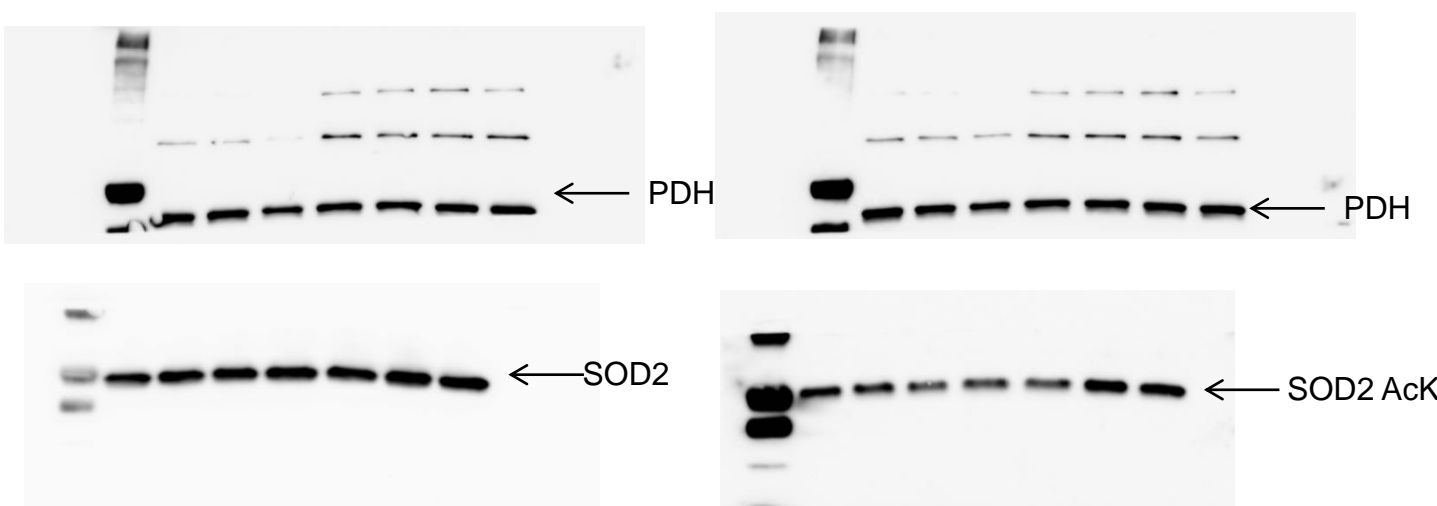

(Blot(s) was cut in two)

Fig 1H

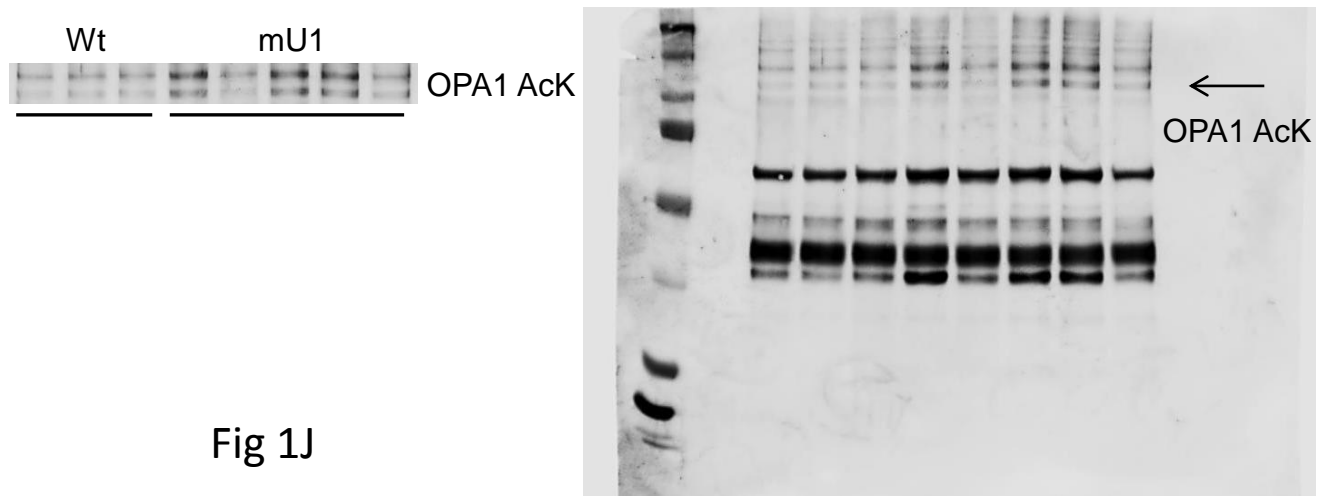

Fig 1J

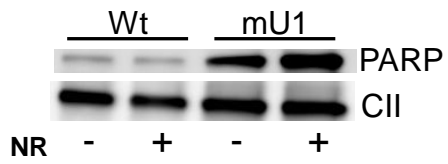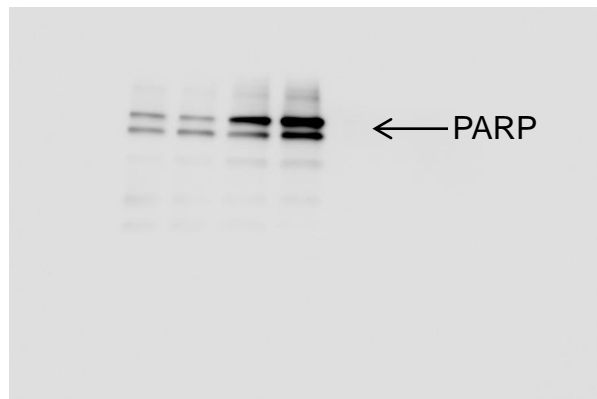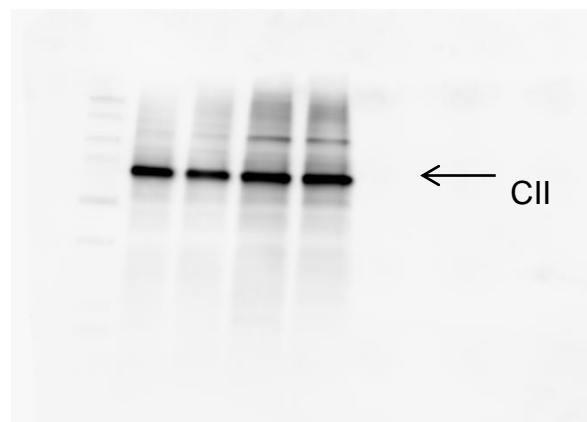

Fig 6A

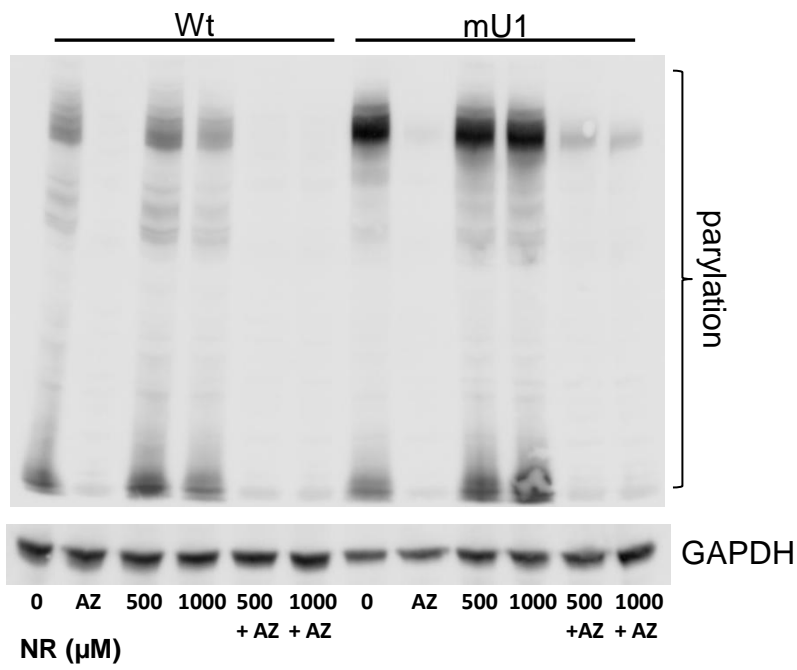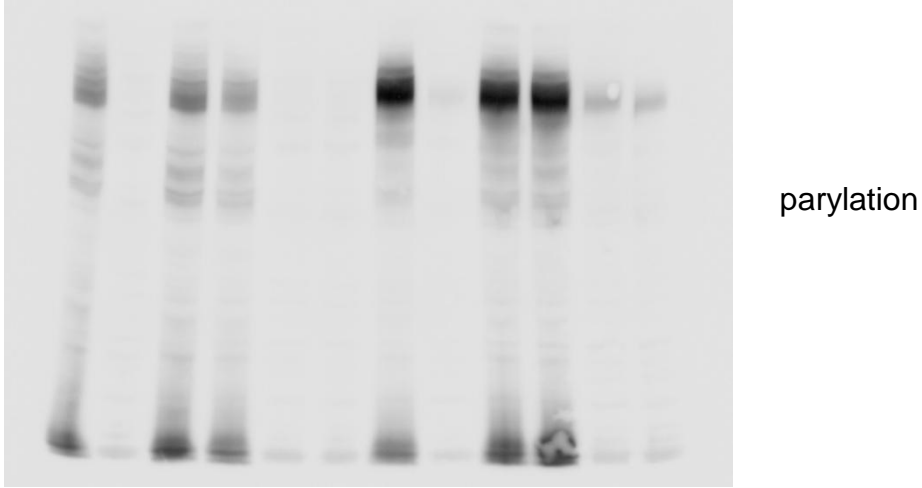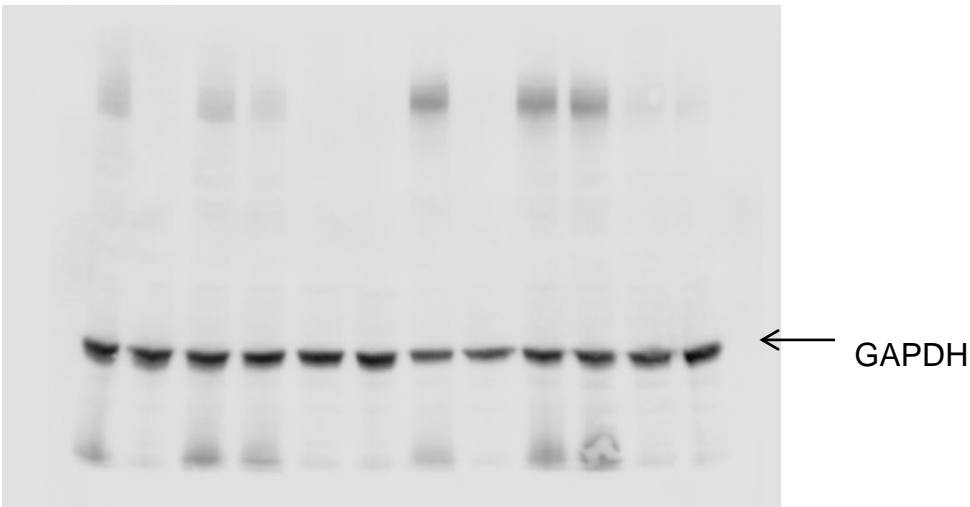

Fig 6C

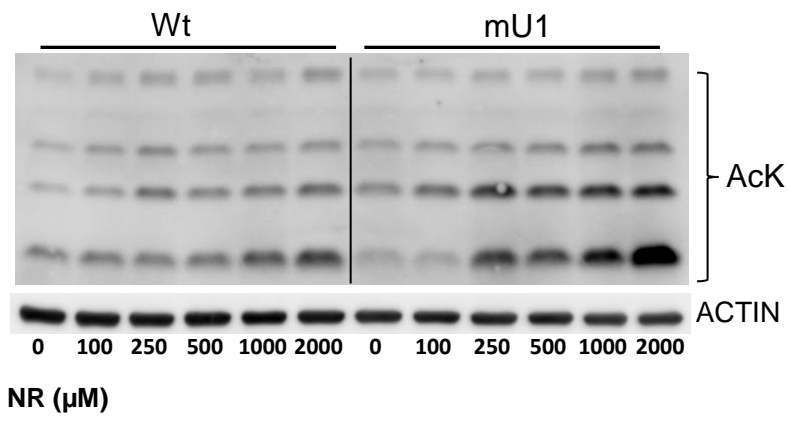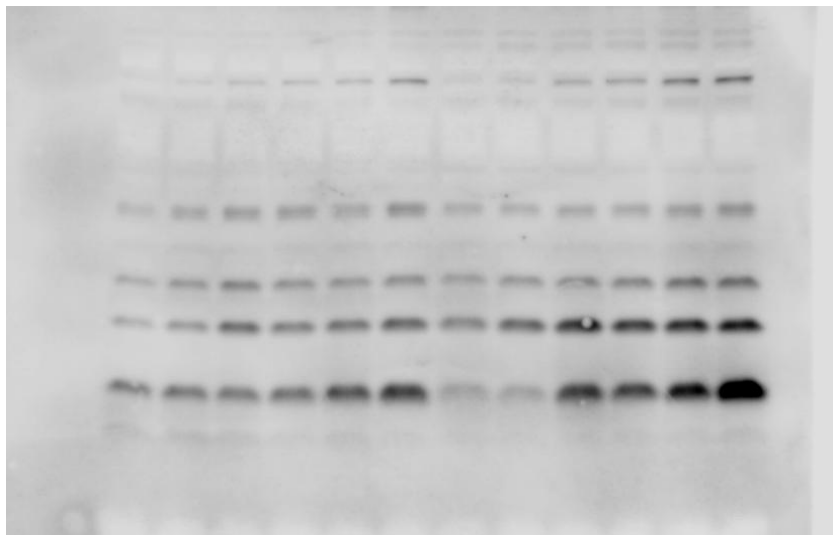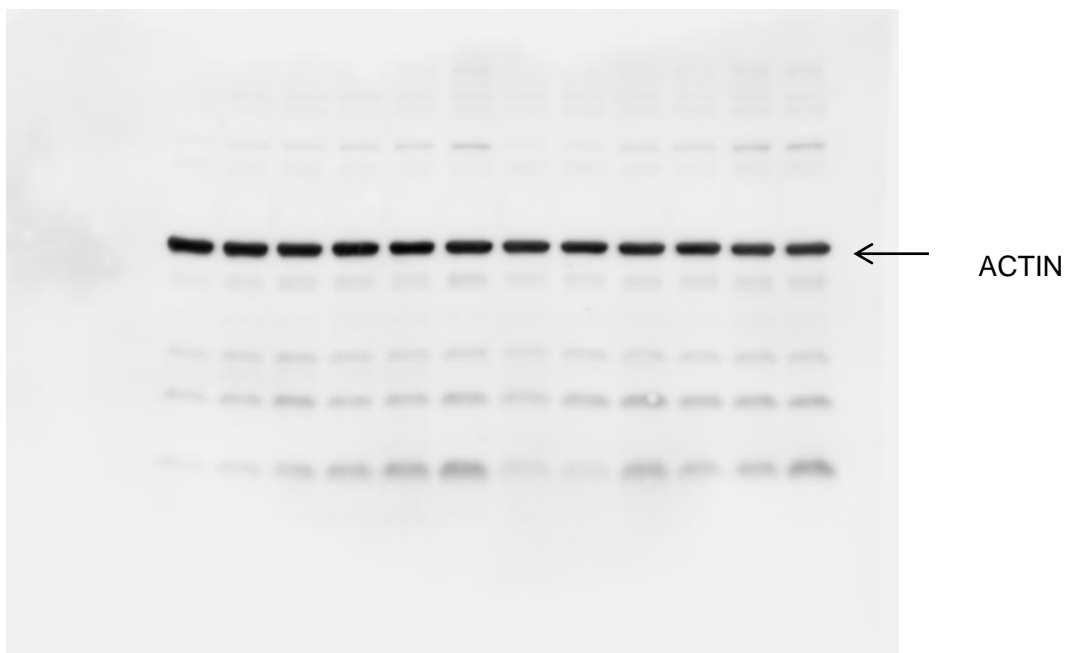

Fig 6E

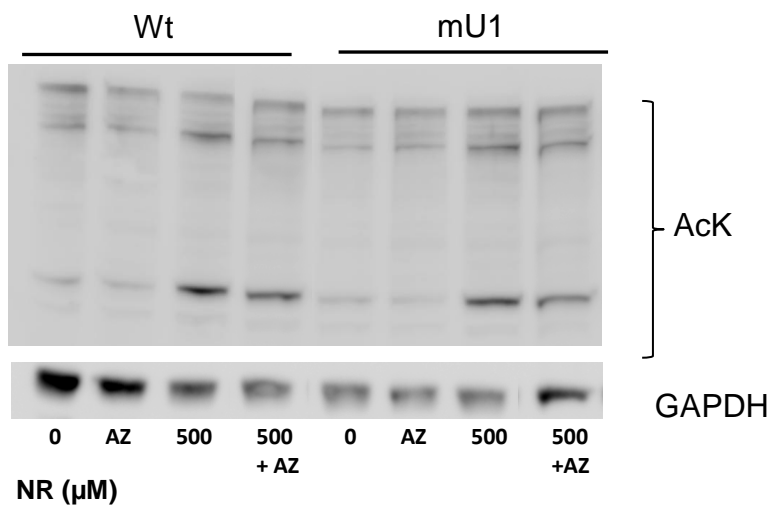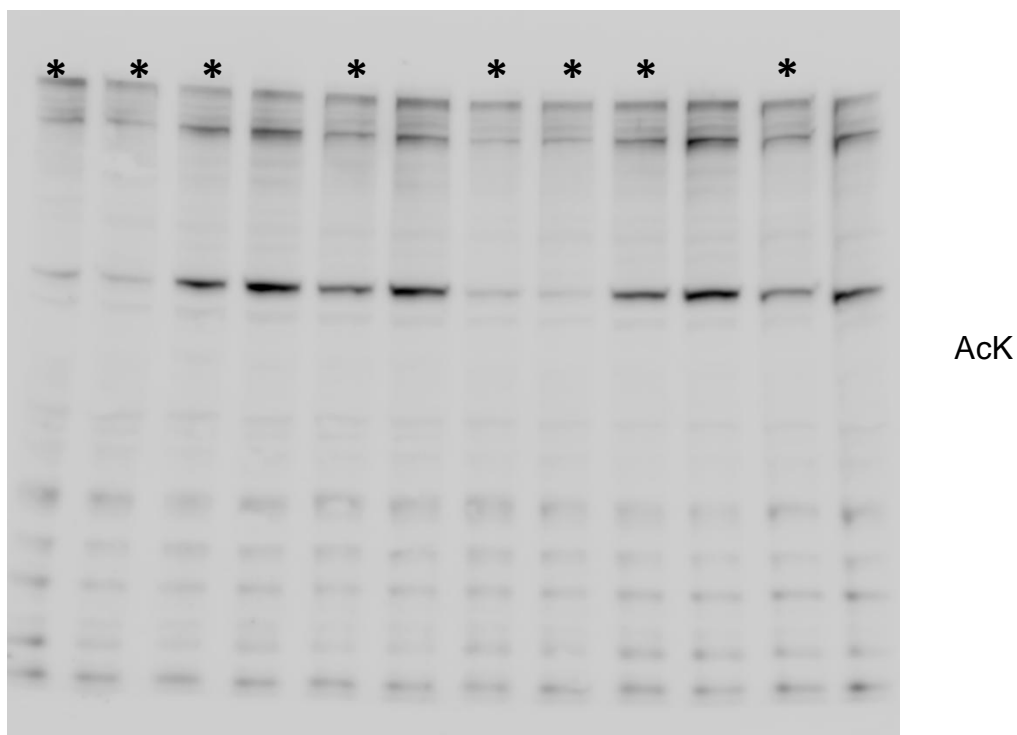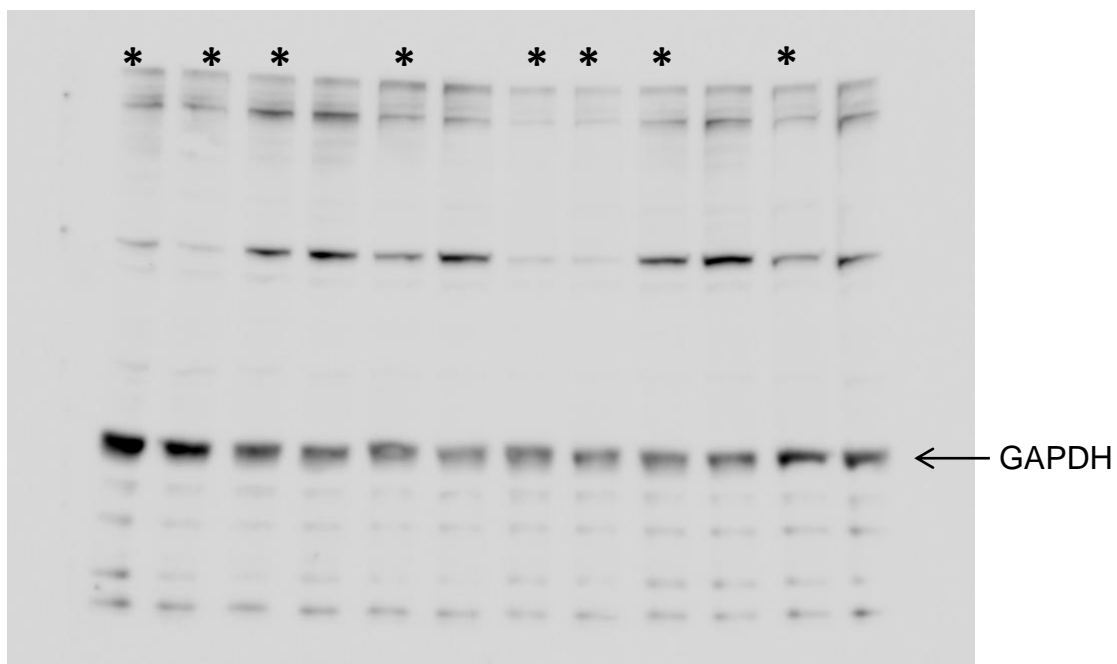

Fig 6G

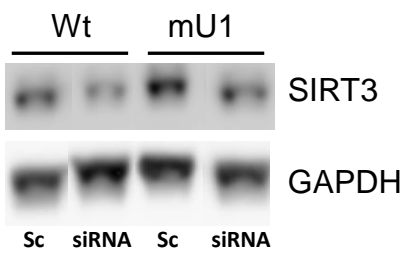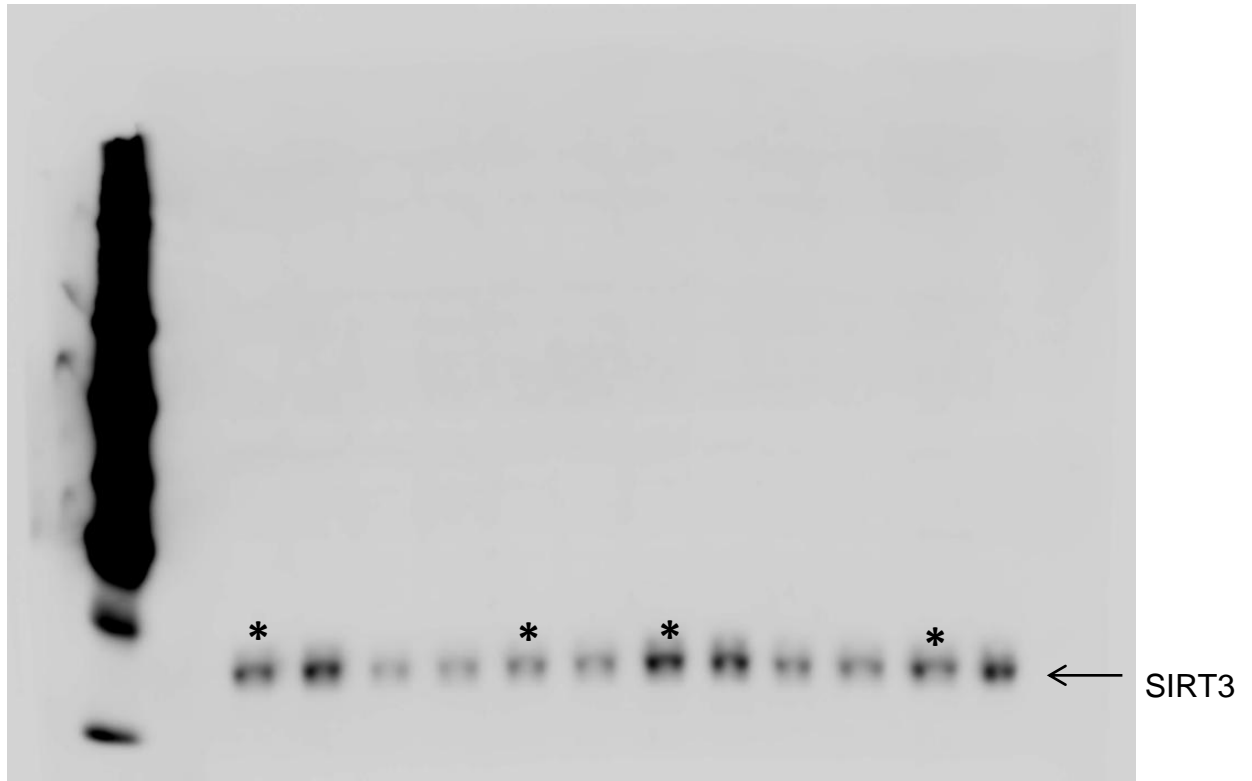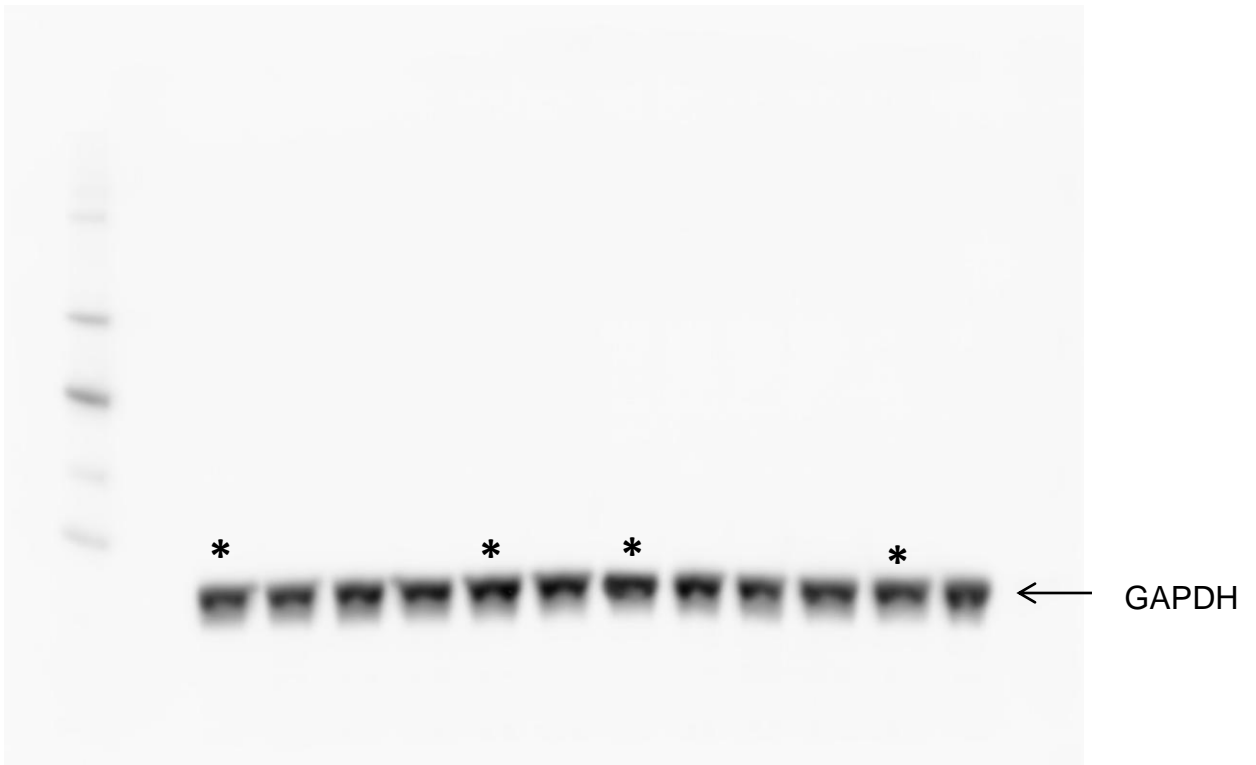

Fig 6I

Wt

mU1

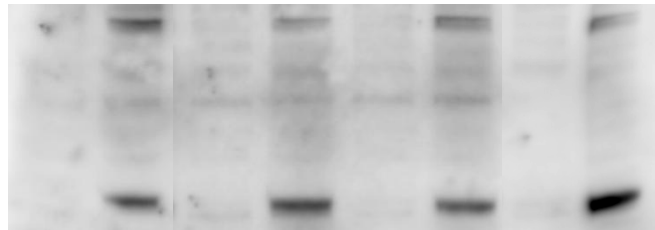

AcK

GAPDH

Sc Sc siRNA siRNA Sc Sc siRNA siRNA  
+ NR + NR + NR + NR

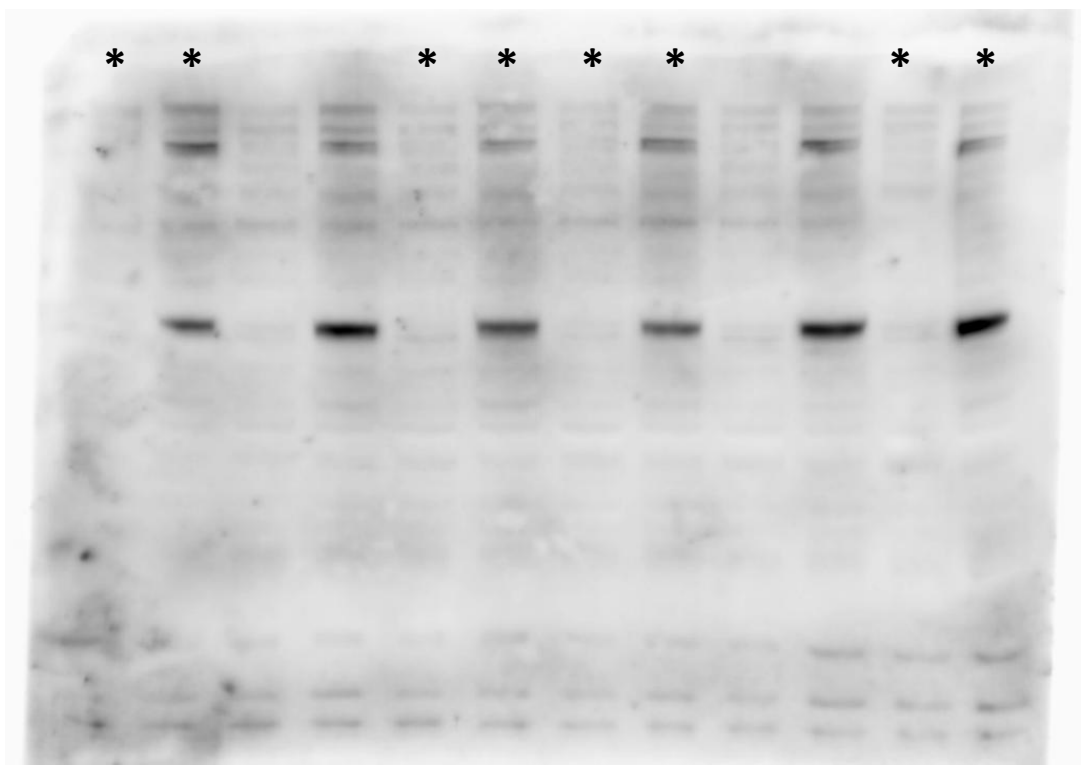

AcK

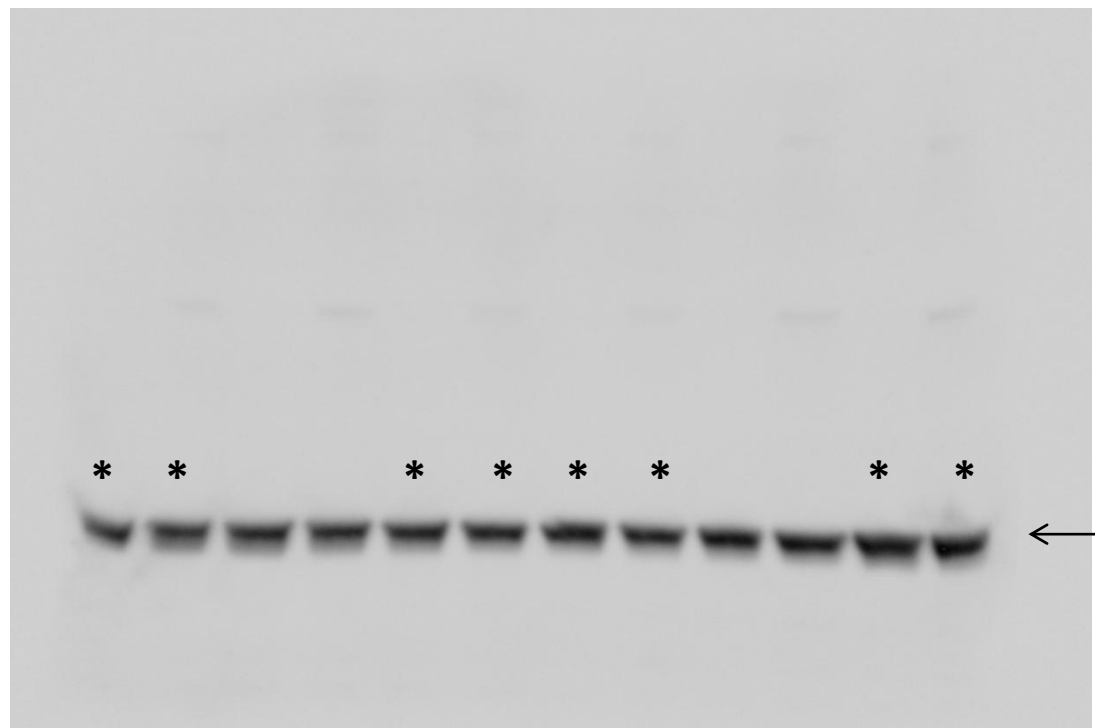

GAPDH
