# Supplementary material for: Instability in NAD+ metabolism leads to impaired cardiac mitochondrial function and communication
Source: eLife. 2021 Aug 3;10:e59828. doi: 10.7554/eLife.59828 (PMC8331182; doi:10.7554/eLife.59828)
Supplement: Source data 1. [file elife-59828-data1.xlsx]

## Sheet: Perseus ALL
LFQ intensity 10	LFQ intensity 11	LFQ intensity 12	LFQ intensity 13	LFQ intensity 1	LFQ intensity 2	LFQ intensity 6	LFQ intensity 8	LFQ intensity 9	LFQ intensity 14	LFQ intensity 15	LFQ intensity 3	LFQ intensity 4	LFQ intensity 5	LFQ intensity 7	Student's T-test Significant WT NR_WT	Student's T-test Significant mU1_WT	Student's T-test Significant mU1 NR_WT	Student's T-test significant	Student's T-test Significant mU1 NR_WT NR	Student's T-test significant_	Student's T-test Significant mU1 NR_mU1	Student's T-test significant__	Peptides	Razor + unique peptides	Unique peptides	Sequence coverage [%]	Unique + razor sequence coverage [%]	Unique sequence coverage [%]	Mol. weight [kDa]	Q-value	Score	Intensity	MS/MS count	Student's T-test p-value WT NR_WT	Student's T-test Difference WT NR_WT	Student's T-test Test statistic WT NR_WT	Student's T-test p-value mU1_WT	Student's T-test Difference mU1_WT	Student's T-test Test statistic mU1_WT	Student's T-test p-value mU1 NR_WT	Student's T-test Difference mU1 NR_WT	Student's T-test Test statistic mU1 NR_WT	Student's T-test p-value mU1 NR_WT NR	Student's T-test Difference mU1 NR_WT NR	Student's T-test Test statistic mU1 NR_WT NR	Student's T-test p-value mU1 NR_mU1	Student's T-test Difference mU1 NR_mU1	Student's T-test Test statistic mU1 NR_mU1	Protein IDs
#!{Type}E	E	E	E	E	E	E	E	E	E	E	E	E	E	E	C	C	C	C	C	C	C	C	N	N	N	N	N	N	N	N	N	N	N	N	N	N	N	N	N	N	N	N	N	N	N	N	N	N	T
#!{C:Group1}WT	WT	WT	WT	WT NR	WT NR	WT NR	WT NR	mU1	mU1	mU1	mU1 NR	mU1 NR	mU1 NR	mU1 NR
7.01030015945435	6.72781229019165	7.30781698226929	7.5775146484375	7.81566429138184	7.86706066131592	7.30211448669434	7.27989482879639	6.59257650375366	7.23902416229248	7.41111421585083	7.59105348587036	7.78298854827881	7.70073843002319	7.74635410308838			+	mU1 NR_WT			+	mU1 NR_mU1	6	6	6	4.5	4.5	4.5	966.36	0	14.896	452880000	19	0.14254	0.410323	1.68718	0.813392	-0.0749561	-0.248828	0.02678	0.549423	2.91572	0.430562	0.1391	0.844901	0.0332126	0.624379	2.91483	A2AAJ9
7.70421934127808	7.55762767791748	7.51930284500122	7.42983293533325	6.84129476547241	7.02924013137817	7.39095258712769	7.40164184570313	7.80869007110596	7.42955827713013	7.56618976593018	7.24257898330688	6.24432754516602	6.69209861755371	7.71291065216064	+			WT NR_WT					3	3	3	16	16	16	33.778	0	41.192	497910000	13	0.0416387	-0.386963	-2.58233	0.688802	0.0487337	0.424567	0.124909	-0.579767	-1.7827	0.600439	-0.192803	-0.552698	0.167984	-0.6285	-1.61152	A2ADF7
8.85928821563721	8.85108661651611	8.8965368270874	8.78181266784668	9.16289329528809	9.14401340484619	8.87081909179688	8.94332122802734	8.39571094512939	8.95516300201416	8.96592140197754	8.98887538909912	9.05560779571533	8.90155124664307	8.71228790283203									63	63	63	2.5	2.5	2.5	3906.4	0	264.75	12126000000	260	0.053984	0.183081	2.39057	0.65946	-0.074916	-0.468022	0.421821	0.0673995	0.861954	0.308945	-0.115681	-1.11138	0.466144	0.142315	0.788467	A2ASS6
7.02503299713135	6.82329273223877	8.3864631652832	8.25391960144043	8.14160633087158	8.27415752410889	8.54460144042969	8.44398212432861	7.19497203826904	7.05546617507935	8.32740020751953	6.41945505142212	8.36348056793213	6.79572296142578	8.45023345947266									2	2	2	0.7	0.7	0.7	305.39	0.0053305	3.5201	3204100000	11	0.130086	0.72891	1.75335	0.876156	-0.096231	-0.163998	0.868237	-0.114954	-0.173137	0.16439	-0.843864	-1.58353	0.979899	-0.0187231	-0.0264803	A3KFM7
7.56851863861084	7.85107469558716	7.83518934249878	7.6028733253479	7.26401472091675	7.59753084182739	7.65641450881958	7.42582750320435	8.1217565536499	7.78260898590088	7.74816656112671	7.1380500793457	7.26294898986816	7.67734241485596	8.07114505767822									6	6	6	12.5	12.5	12.5	80.851	0	42.621	853980000	29	0.0963264	-0.228467	-1.97018	0.258739	0.169763	1.27378	0.460871	-0.177042	-0.787659	0.830347	0.0514247	0.223789	0.255161	-0.346806	-1.2848	A6H611
7.77882385253906	7.90925121307373	7.91390895843506	8.06621360778809	8.12054061889648	8.02686023712158	7.78979206085205	7.75953197479248	7.73254632949829	7.96162986755371	7.4276123046875	8.30321788787842	8.16360855102539	8.23101043701172	7.98774671554565			+	mU1 NR_WT			+	mU1 NR_mU1	6	6	6	40.9	40.9	40.9	15.676	0	19.434	1459000000	47	0.948708	0.00713181	0.0670665	0.212635	-0.209787	-1.42807	0.0295078	0.254346	2.84153	0.0683248	0.247215	2.21865	0.0283682	0.464133	3.05173	B1AR13
6.67891883850098	7.05766630172729	7.11127328872681	7.004478931427	6.7766318321228	7.47658538818359	7.27964401245117	7.24159622192383	6.65502691268921	7.12557888031006	7.84637546539307	7.38943195343018	6.85557174682617	7.43373775482178	7.25090789794922									2	2	2	1.6	1.6	1.6	206.23	0.001292	7.1292	213230000	14	0.24112	0.23053	1.30058	0.466072	0.245909	0.788604	0.150666	0.269328	1.64696	0.851233	0.038798	0.195795	0.946009	0.0234186	0.0711868	B2RXS4
7.04983806610107	7.28545188903809	7.11109447479248	7.09275579452515	6.57755899429321	7.02321577072144	6.87554454803467	6.61920309066772	6.81174755096436	7.11984968185425	7.23820066452026	6.41103363037109	6.8332953453064	6.59778881072998	6.71198415756226	+		+	mU1 NR_WT;WT NR_WT			+	mU1 NR_mU1	2	2	2	3	3	3	56.677	0.0022779	4.3929	99051000	2	0.0223007	-0.360904	-3.05735	0.552211	-0.0781858	-0.636888	0.00304225	-0.49626	-4.78658	NaN	0	NaN	0.038844	-0.418074	-2.78126	B7ZMP1
8.10329055786133	8.13529205322266	8.23663806915283	8.25408840179443	8.15451526641846	7.9950909614563	8.13286781311035	8.19021987915039	8.30563068389893	8.17222309112549	7.49978733062744	8.19387531280518	8.07007503509521	7.98174619674683	8.20593452453613									14	14	14	34.4	34.4	34.4	73.963	0	78.169	2119600000	64	0.300227	-0.0641538	-1.13357	0.414196	-0.18978	-0.890074	0.327063	-0.0694195	-1.06688	0.94113	-0.00526571	-0.0769967	0.604647	0.120361	0.552103	D3Z7P3
7.64428091049194	7.92360687255859	7.54690027236938	7.89035940170288	7.58477210998535	7.67108964920044	7.67998170852661	7.80112934112549	7.2035493850708	7.44773149490356	7.42994403839111	7.39446926116943	7.90738439559937	8.07040691375732	7.21221446990967		+		mU1_WT					6	6	6	7.2	7.2	7.2	87.428	0	36.541	732910000	20	0.5372	-0.0670437	-0.65426	0.0279146	-0.390879	-3.06587	0.655296	-0.105168	-0.46949	0.861194	-0.0381244	-0.182508	0.305354	0.28571	1.14153	E9PV24
6.64611911773682	7.30819225311279	7.11672449111938	7.06397390365601	7.09523916244507	7.19133901596069	7.27595520019531	6.65348100662231	6.67383527755737	6.53381681442261	7.66081523895264	6.33062362670898	6.76550340652466	6.58962726593018	6.4700345993042					+	mU1 NR_WT NR			2	2	2	0.6	0.6	0.6	293.02	0.0053362	3.5397	88822000	3	0.921297	0.0202512	0.103029	NaN	0	NaN	NaN	0	NaN	0.0212461	-0.515056	-3.0952	NaN	0	NaN	E9PVA8
6.803297996521	6.83185911178589	7.50271368026733	7.67221784591675	7.88083648681641	7.88883066177368	7.12998390197754	7.10860204696655	7.64185094833374	6.93323469161987	8.08395385742188	8.16554069519043	6.16813802719116	7.27257680892944	7.67414426803589									2	2	2	0.4	0.4	0.4	584.78	0.0098135	2.58	690630000	9	0.378941	0.299541	0.949684	0.406245	0.350491	0.906481	0.81505	0.117578	0.24442	0.717234	-0.181963	-0.379715	0.702638	-0.232913	-0.404398	E9Q555
9.17831516265869	9.01828384399414	8.62291812896729	8.998703956604	8.92575550079346	9.11384296417236	8.8476037979126	8.93843936920166	9.07605743408203	8.94694805145264	9.04028606414795	8.72567462921143	8.77789783477783	8.471116065979	8.65891742706299					+	mU1 NR_WT NR	+	mU1 NR_mU1	38	34	33	43.5	41.4	40.2	102.53	0	255.14	13809000000	197	0.989108	0.00185513	0.01423	0.660968	0.0665419	0.465764	0.0713179	-0.296154	-2.18752	0.0143573	-0.298009	-3.40781	0.00818231	-0.362696	-4.23838	O08528;Q3TRM8
8.16524410247803	8.0454797744751	8.06137752532959	8.01241493225098	8.62247276306152	8.53382301330566	8.13947010040283	8.23324966430664	7.15296077728271	8.11723804473877	7.40117645263672	8.56212615966797	8.51683902740479	8.56598949432373	8.12755870819092	+		+	mU1 NR_WT;WT NR_WT			+	mU1 NR_mU1	18	18	18	20.9	20.9	20.9	124.63	0	66.364	2786500000	103	0.0419257	0.311125	2.57722	0.0899733	-0.514004	-2.09807	0.0152812	0.371999	3.35727	0.711736	0.0608745	0.387533	0.0226087	0.886003	3.25347	O08532
7.45521020889282	7.56192398071289	7.47350168228149	6.26465463638306	7.4955997467041	7.59722328186035	7.55661582946777	7.74221420288086	7.39084672927856	7.42621850967407	8.06828784942627	7.61147880554199	7.58493041992188	7.57647943496704	7.44513702392578									6	6	6	16.1	16.1	16.1	62.277	0	50.531	467960000	14	0.239538	0.409091	1.30552	0.331882	0.439628	1.07404	0.284436	0.365684	1.17519	0.524774	-0.0434068	-0.675075	0.712286	-0.0739446	-0.390448	O08553
7.86870336532593	7.89202785491943	7.99455451965332	8.14863395690918	7.84120941162109	7.95494174957275	7.83929586410522	7.88666009902954	7.82374143600464	8.08632469177246	7.74916410446167	7.64494037628174	7.70457935333252	7.60760498046875	7.92399978637695			+	mU1 NR_WT					4	4	4	17	17	17	32.19	0	11.648	1187000000	18	0.217223	-0.0954531	-1.37857	0.467711	-0.0895698	-0.785538	0.0362937	-0.255699	-2.685	0.0789177	-0.160246	-2.11416	0.223902	-0.166129	-1.38767	O08600
7.15869379043579	7.24049949645996	6.48551988601685	6.66287088394165	6.86237001419067	6.80424833297729	6.69050598144531	6.75541257858276	6.89761304855347	6.86450576782227	8.03411769866943	6.94379615783691	6.84321403503418	6.94091463088989	6.69269466400146									2	2	2	1.7	1.7	1.7	73.101	0.0022831	4.5101	45298000	7	0.584839	-0.108762	-0.577131	0.375231	0.378516	0.973022	0.87545	-0.0317411	-0.163557	0.30928	0.0770206	1.11054	0.26783	-0.410257	-1.24639	O08677
10.2999210357666	10.3575344085693	10.3725624084473	10.2955226898193	10.6230945587158	10.6315956115723	10.4522466659546	10.4032402038574	10.2867708206177	10.3494520187378	10.298285484314	10.532639503479	10.5829830169678	10.472785949707	10.4291219711304	+		+	mU1 NR_WT;WT NR_WT			+	mU1 NR_mU1	42	42	42	77.8	77.8	77.8	54.272	0	323.31	423070000000	1241	0.0191367	0.196159	3.17748	0.514187	-0.0198824	-0.701679	0.00441985	0.172997	4.43068	0.743293	-0.0231616	-0.343005	0.00649957	0.19288	4.48318	O08749
9.36357402801514	9.41879844665527	9.55225467681885	9.43141174316406	9.23093414306641	9.2238073348999	9.53374671936035	9.54508399963379	9.46707534790039	9.58215427398682	9.54245185852051	9.53798294067383	9.3825216293335	9.31573963165283	9.59811210632324									16	16	16	58.2	58.2	58.2	27.418	0	323.31	41352000000	246	0.576694	-0.0581167	-0.590041	0.16542	0.0890508	1.62345	0.831552	0.0170794	0.222168	0.525489	0.075196	0.673869	0.424595	-0.0719714	-0.868986	O08756
8.07456016540527	7.86357259750366	8.01561164855957	8.04641723632813	6.29745483398438	7.59796905517578	7.89392805099487	7.83843994140625	8.08997535705566	8.12136268615723	7.82404470443726	8.05014801025391	7.7987265586853	8.01944828033447	8.16220569610596									11	11	11	35.3	35.3	35.3	47.513	0	38.149	1389000000	38	0.167982	-0.593092	-1.56777	0.907868	0.0117538	0.121711	0.935137	0.00759172	0.0848552	0.167845	0.600684	1.56836	0.973612	-0.00416211	-0.034766	O08917
7.82396936416626	7.62881803512573	7.63212299346924	7.23549556732178	7.69917821884155	7.77614164352417	7.79694890975952	6.68114566802979	7.65517663955688	6.54462432861328	7.37443828582764	7.7294807434082	7.64127588272095	7.7066068649292	7.68752908706665									3	3	3	31.8	31.8	31.8	17.444	0	21.808	648110000	8	0.767713	-0.0917479	-0.309079	0.271991	-0.388688	-1.23414	0.408257	0.111122	0.888942	0.481689	0.20287	0.749873	0.134119	0.49981	1.78621	O09111
7.31183862686157	7.23625993728638	7.3741250038147	6.82762050628662	7.68220806121826	7.70831060409546	7.24765396118164	7.45663928985596	6.91770505905151	7.15488004684448	7.38573598861694	7.18272829055786	7.43974304199219	7.21362400054932	6.99104881286621									3	3	3	13.8	13.8	13.8	28.899	0	51.957	340310000	26	0.0859583	0.336242	2.05238	0.858248	-0.0346873	-0.188027	0.904074	0.019325	0.125703	0.066832	-0.316917	-2.2347	0.744644	0.0540123	0.344278	O09117
8.99118137359619	8.95116710662842	9.23003959655762	8.95415115356445	8.95676898956299	8.98442363739014	9.20175170898438	9.1930685043335	8.82415199279785	9.07430458068848	8.927565574646	9.00582408905029	9.07291126251221	9.21542644500732	9.04743099212646									16	16	16	33	33	33	48.176	0	174.99	17510000000	196	0.59644	0.0523684	0.558926	0.409562	-0.0896274	-0.899605	0.530465	0.0537634	0.665504	0.986645	0.00139499	0.0174485	0.137459	0.143391	1.76711	O09161
6.46077871322632	7.15474796295166	7.32868528366089	7.33324575424194	7.37069797515869	7.45204734802246	7.33893156051636	6.79595899581909	8.05476665496826	7.33241844177246	7.41498184204102	6.8210654258728	7.33555841445923	6.94618272781372	7.33711957931519									3	3	3	13.4	13.4	13.4	41.704	0	12.821	394900000	4	0.530493	0.170045	0.665456	0.147871	0.531358	1.71045	0.874377	0.0406171	0.164981	0.54222	-0.129427	-0.645938	0.104298	-0.490741	-1.9821	O09174
7.90237808227539	7.79801511764526	7.96142101287842	7.97421216964722	8.0165319442749	7.98807716369629	8.24211883544922	8.22315788269043	6.71094942092896	8.024977684021	8.33656024932861	8.11370944976807	7.95084667205811	8.14497852325439	8.07543754577637	+		+	mU1 NR_WT;WT NR_WT					4	4	4	13.2	13.2	13.2	54.043	0	18.19	1438300000	21	0.0368902	0.208465	2.67277	0.625172	-0.218177	-0.520133	0.0323521	0.162236	2.77164	0.580984	-0.0462284	-0.583228	0.406387	0.380414	0.906185	O35114
9.15769863128662	9.19122695922852	8.93209266662598	9.14860248565674	8.970871925354	9.04450035095215	8.95012092590332	8.91365528106689	9.80778503417969	8.98801422119141	8.99631500244141	8.98336029052734	8.83867263793945	9.11600971221924	9.18895626068115									31	31	31	86.6	86.6	86.6	33.296	0	263.39	26921000000	221	0.0795119	-0.137618	-2.10873	0.539547	0.156633	0.658126	0.466029	-0.0756555	-0.778187	0.478121	0.0619626	0.756266	0.386804	-0.232288	-0.947693	O35129
6.83822536468506	6.9715633392334	6.72179174423218	7.2035493850708	7.21759176254272	7.18794345855713	7.13146924972534	6.67985486984253	7.91496181488037	6.34916257858276	7.0444860458374	6.82355546951294	6.89013576507568	6.77367210388184	7.27214336395264									6	6	6	58.5	58.5	58.5	12.159	0	33.994	232500000	13	0.487971	0.120432	0.738694	0.688773	0.169088	0.424609	0.969595	0.00609422	0.039733	0.525054	-0.114338	-0.674605	0.701892	-0.162993	-0.405481	O35143
8.05564594268799	8.02604293823242	7.93289995193481	8.07827568054199	8.13744926452637	8.13519668579102	8.01936531066895	8.20256996154785	7.64662933349609	7.84289598464966	7.81995153427124	7.87875175476074	8.04076099395752	8.12639141082764	8.01619720458984		+		mU1_WT			+	mU1 NR_mU1	4	4	4	3.3	3.3	3.3	140.47	0	27.897	1499400000	33	0.0899589	0.100429	2.01953	0.0108536	-0.253391	-3.94974	0.902955	-0.00769079	-0.127177	0.141808	-0.10812	-1.69091	0.0275746	0.2457	3.07665	O35206
6.80527353286743	6.33361148834229	6.64705514907837	6.84581756591797	6.93884229660034	6.49034404754639	6.85598659515381	6.61521244049072	7.16250467300415	6.95227479934692	7.35819673538208	7.32556629180908	6.95191478729248	7.18058443069458	7.40267419815063		+	+	mU1 NR_WT;mU1_WT	+	mU1 NR_WT NR			2	2	2	0.8	0.8	0.8	171.18	0.0012225	6.004	122300000	8	NaN	0	NaN	0.0316149	0.499719	2.95737	0.0107447	0.557245	3.647	0.0143161	0.490089	3.41015	0.7221	0.0575262	0.376347	O35379
7.97704172134399	8.0459098815918	7.97328042984009	7.80402374267578	8.11303997039795	8.21093368530273	8.12713718414307	8.34036445617676	7.88952016830444	7.94463062286377	7.45516490936279	8.30239582061768	8.18164348602295	8.07525444030762	8.1052713394165	+		+	mU1 NR_WT;WT NR_WT			+	mU1 NR_mU1	7	7	7	26.8	26.8	26.8	42.699	0	41.413	1764200000	47	0.0148359	0.247805	3.38119	0.248273	-0.186959	-1.30642	0.0242322	0.216077	2.99281	0.677853	-0.0317276	-0.436341	0.0369146	0.403036	2.82445	O35435
8.94600486755371	9.05785655975342	8.87353610992432	8.76225090026855	8.72464466094971	8.93906497955322	8.52944278717041	8.66572189331055	9.06981563568115	8.72315216064453	8.71489906311035	8.85297966003418	8.67032051086426	8.76908874511719	8.70505905151367									17	17	17	59.3	59.3	59.3	36.118	0	164.96	11347000000	102	0.113666	-0.195194	-1.85079	0.572023	-0.0739565	-0.604286	0.0730051	-0.16055	-2.17056	0.725686	0.0346434	0.367747	0.462068	-0.0865936	-0.796124	O35459
8.29409122467041	8.23067855834961	8.25775051116943	7.86764430999756	7.43775033950806	6.66636371612549	7.66617155075073	7.90493726730347	8.75719833374023	7.86618089675903	7.49078035354614	8.00410652160645	6.5859169960022	7.95196866989136	8.30341243743896	+			WT NR_WT					4	4	4	24.8	24.8	24.8	31.013	0	110.44	2444100000	28	0.0406702	-0.743735	-2.59986	0.725719	-0.124488	-0.371169	0.297625	-0.45119	-1.1403	0.554664	0.292545	0.625514	0.579359	-0.326702	-0.592395	O35658
7.57222080230713	7.66885185241699	7.75235557556152	7.34384155273438	7.10404300689697	7.0643458366394	7.44746828079224	7.71463966369629	7.96590232849121	7.42219591140747	7.62952136993408	7.07051801681519	7.21579599380493	7.46726751327515	7.73735952377319									4	4	4	19.8	19.8	19.8	33.387	0	22.102	565600000	24	0.205262	-0.251693	-1.42057	0.623345	0.0882224	0.522952	0.262386	-0.211582	-1.23676	0.856417	0.0401111	0.188876	0.228007	-0.299805	-1.37342	O35678
7.97272109985352	7.97292900085449	8.01711654663086	7.82404136657715	8.05808448791504	8.19642448425293	8.09677124023438	7.89222812652588	7.705153465271	8.00333118438721	7.46817255020142	7.87235450744629	8.18312740325928	7.93449354171753	7.72914028167725									3	3	3	13.4	13.4	13.4	35.284	0	20.572	1433900000	22	0.18416	0.114175	1.50048	0.172036	-0.22115	-1.59302	0.875765	-0.0169231	-0.163139	0.293803	-0.131098	-1.15028	0.286725	0.204227	1.19206	O35682
8.06337070465088	8.3196268081665	8.13181114196777	7.68785858154297	6.90497732162476	8.038818359375	7.80046272277832	6.74730014801025	7.76771211624146	7.92551326751709	7.85593605041504	7.56939744949341	7.55797624588013	7.79713582992554	7.60941314697266			+	mU1 NR_WT			+	mU1 NR_mU1	2	2	2	31.4	31.4	31.4	8.1384	0.0012674	6.551	1829100000	25	0.0988348	-0.677777	-1.95163	0.268235	-0.200946	-1.24519	0.02724	-0.417186	-2.90266	0.454292	0.260591	0.799848	0.0362297	-0.21624	-2.84039	O35683
9.57046127319336	9.53985404968262	9.74389362335205	9.64396572113037	9.40286254882813	9.42904090881348	9.63267993927002	9.67778015136719	9.73494338989258	9.70019340515137	9.20363140106201	9.66222858428955	9.41522407531738	9.64736366271973	9.72549533843994									18	18	18	46.6	46.6	46.6	44.127	0	239.55	61119000000	333	0.326829	-0.0889528	-1.06744	0.631293	-0.0782876	-0.510715	0.888352	-0.0119658	-0.146465	0.459649	0.076987	0.789912	0.703556	0.0663218	0.403068	O35855
8.88052749633789	8.86471271514893	8.88546276092529	8.71052360534668	8.69090461730957	8.7429370880127	8.99104022979736	8.97846794128418	9.14850997924805	8.92750930786133	8.62691497802734	8.73727226257324	8.80932426452637	8.66038131713867	9.1144437789917									10	10	10	24.6	24.6	24.6	51.091	0	150.52	12116000000	112	0.866591	0.0155308	0.175325	0.649123	0.0656714	0.483572	0.964888	-0.00495124	-0.0458887	0.876639	-0.0204821	-0.161979	0.699596	-0.0706227	-0.408817	O35857
8.06889057159424	8.21671962738037	8.25621223449707	8.15338802337646	8.04024600982666	8.10226249694824	8.29413509368896	8.20474338531494	6.58417987823486	8.35422325134277	7.70234870910645	8.14578628540039	6.95713043212891	8.09468078613281	7.98883962631226									4	4	4	52.1	52.1	52.1	17.121	0	19.813	1794800000	10	0.852571	-0.0134559	-0.194009	0.209221	-0.626885	-1.44072	0.233401	-0.377193	-1.32498	0.252347	-0.363737	-1.2663	0.666627	0.249692	0.457317	O35972
7.82115316390991	7.75313091278076	7.7060604095459	7.73194313049316	7.73344612121582	7.828453540802	7.79790449142456	7.82807970046997	7.73972272872925	7.81448745727539	7.29031896591187	7.73533535003662	7.79296588897705	7.85152721405029	7.7959566116333									5	5	5	12.9	12.9	12.9	49.027	0	12.766	830490000	15	0.235184	0.0438991	1.31928	0.36889	-0.138229	-0.987172	0.277299	0.0408744	1.19466	0.929091	-0.0030247	-0.0927899	0.25635	0.179103	1.28112	O54734
7.01233100891113	7.2668194770813	6.85057878494263	6.90436363220215	6.85140323638916	6.67385673522949	6.1223316192627	7.03051853179932	6.88817405700684	6.73108911514282	7.15850687026978	6.508713722229	7.20265197753906	6.85895204544067	7.02791786193848									2	2	2	2.8	2.8	2.8	86.738	0.0012136	5.8428	113850000	10	0.169364	-0.338996	-1.56179	0.608392	-0.0825999	-0.546222	0.555259	-0.108964	-0.624545	0.385647	0.230031	0.935477	0.902143	-0.0263644	-0.129324	O54890
8.06870555877686	7.99718952178955	8.12100124359131	7.91274261474609	8.03985023498535	8.07762241363525	8.23917388916016	8.27646160125732	7.61564493179321	7.98607730865479	7.85093116760254	8.11230373382568	8.31183815002441	8.14656257629395	8.12781715393066							+	mU1 NR_mU1	4	4	4	10.7	10.7	10.7	54.319	0	14.015	1739600000	30	0.121182	0.133367	1.80458	0.105668	-0.207359	-1.97189	0.0598545	0.149721	2.31504	0.833689	0.0163534	0.219296	0.0197905	0.357079	3.37459	O55026
7.82358503341675	8.09621429443359	8.25020027160645	8.24259090423584	7.06119346618652	6.44502067565918	7.87876892089844	8.06992721557617	7.60312271118164	8.11968421936035	7.18379259109497	6.87637424468994	7.81217098236084	7.90963077545166	7.56627225875854									5	5	5	18.4	18.4	18.4	46.587	0	21.654	1220300000	18	0.106276	-0.73942	-1.89928	0.126536	-0.467614	-1.83142	0.0684587	-0.562036	-2.21723	0.7025	0.177384	0.400728	0.801865	-0.0944211	-0.264619	O55028
7.6378698348999	7.59459161758423	6.72643804550171	7.35510635375977	8.13795471191406	8.12460231781006	7.43754434585571	7.44723558425903	7.14401340484619	7.38776350021362	7.53492403030396	7.52919912338257	7.74526214599609	7.61090469360352	7.3414740562439									3	3	3	3.2	3.2	3.2	122.38	0	32.601	647650000	23	0.164233	0.458333	1.58423	0.922984	0.0270655	0.101651	0.352436	0.228209	1.00783	0.327843	-0.230124	-1.06501	0.205105	0.201143	1.45623	O55111
10.0201539993286	9.96560573577881	10.1451959609985	9.91177558898926	9.97294807434082	9.99787521362305	10.2092733383179	10.0953435897827	10.0284490585327	10.1250257492065	10.0123310089111	10.0965623855591	10.0762395858765	10.0931768417358	10.0354700088501									28	28	28	77.9	77.9	77.9	32.932	0	323.31	177640000000	456	0.458201	0.0581772	0.79259	0.529782	0.0445858	0.67473	0.259352	0.0646794	1.24558	0.910621	0.00650215	0.117075	0.577983	0.0200936	0.594619	O55126
9.82471179962158	9.73203945159912	9.80701351165771	9.75284671783447	9.85019302368164	9.86627006530762	9.88714981079102	9.901686668396	9.39310073852539	9.74856758117676	9.63351917266846	9.79844379425049	9.86602687835693	9.86877346038818	9.67127513885498	+			WT NR_WT					43	43	43	40.1	40.1	40.1	114.86	0	323.31	97877000000	637	0.00764534	0.097172	3.93764	0.0954948	-0.187424	-2.05122	0.682562	0.0219769	0.42949	0.165329	-0.0751951	-1.57938	0.0984591	0.209401	2.02722	O55143;Q8R429;Q64518
8.60152721405029	8.41639041900635	8.46286201477051	8.5243444442749	8.54569053649902	8.6953763961792	8.53897571563721	8.64349174499512	8.58662128448486	8.33332633972168	7.66691255569458	8.58494186401367	8.54927349090576	8.68860626220703	8.67836380004883									12	12	12	54.3	54.3	54.3	22.228	0	47.403	5476600000	78	0.107766	0.104603	1.88924	0.248899	-0.305661	-1.30443	0.0572688	0.124015	2.34731	0.718886	0.0194128	0.377371	0.124576	0.429676	1.84356	O70325
7.79534482955933	6.53557586669922	7.65614604949951	7.0507173538208	7.85760402679443	7.78356075286865	6.41814470291138	7.64019298553467	7.23785972595215	6.86678409576416	7.48006153106689	7.89010810852051	7.97218418121338	7.41257810592651	7.03261852264404									4	4	4	9.4	9.4	9.4	84.533	0	10.26	704820000	6	0.723491	0.16543	0.370848	0.869965	-0.0645442	-0.172291	0.416674	0.317426	0.872117	0.719337	0.151997	0.376732	0.258103	0.38197	1.27573	O70423;Q812C9
8.91709613800049	8.94045162200928	8.88771820068359	8.70463943481445	9.08518314361572	9.05625629425049	8.95900344848633	8.93635272979736	8.60611248016357	8.78835964202881	8.6901159286499	9.04135322570801	9.01207733154297	8.97425365447998	9.00876998901367			+	mU1 NR_WT			+	mU1 NR_mU1	40	40	40	40.2	40.2	40.2	140.63	0	253.93	12412000000	268	0.0642504	0.146723	2.26337	0.0823958	-0.167614	-2.16757	0.0382732	0.146637	2.6452	0.998317	-8.53539e-05	-0.00219909	0.00112722	0.314251	6.69149	O70468
8.41318225860596	8.37845230102539	8.351487159729	8.4301233291626	8.21431350708008	8.33033275604248	8.23663806915283	8.61507606506348	8.35934257507324	8.29791355133057	7.48259687423706	8.51546287536621	8.17629432678223	8.5250186920166	8.58065128326416									10	10	10	34.7	34.7	34.7	46.596	0	59.171	3614400000	49	0.654054	-0.0442212	-0.471331	0.203903	-0.346694	-1.46081	0.57208	0.0560455	0.597402	0.470864	0.100267	0.769375	0.182547	0.402739	1.54695	O70571
6.80387592315674	6.60336446762085	7.14684104919434	7.2130126953125	7.34295558929443	7.29125785827637	7.02863645553589	7.32157754898071	7.27046918869019	6.70004653930664	7.35448551177979	6.96022653579712	7.50471544265747	6.59088087081909	6.87215900421143									3	3	3	8.1	8.1	8.1	66.406	0	12.745	252890000	4	0.108751	0.304333	1.88267	0.52221	0.16656	0.687745	0.872109	0.0402219	0.167992	0.244595	-0.264111	-1.28982	0.675236	-0.126338	-0.444537	O88342
8.73028182983398	8.7046480178833	8.68856239318848	8.96123600006104	8.65122032165527	8.62296009063721	8.83346557617188	8.74256801605225	9.10088729858398	8.85785102844238	9.34480476379395	8.68635940551758	8.70379829406738	8.7337589263916	8.94223594665527									16	16	16	60.8	60.8	60.8	29.758	0	161.75	10259000000	89	0.490066	-0.0586286	-0.734987	0.06476	0.329999	2.35989	0.959281	-0.00464392	-0.0532241	0.505066	0.0539846	0.708759	0.0584595	-0.334643	-2.44269	O88441
7.83103084564209	7.85402631759644	8.24531555175781	7.94614744186401	7.72880792617798	7.66587162017822	8.23024463653564	8.19245624542236	7.72680044174194	8.10612297058105	8.20123291015625	7.97877836227417	7.81489324569702	8.11008453369141	8.21449947357178									8	8	8	28.1	28.1	28.1	34.49	0	62.737	1573300000	53	0.936154	-0.0147849	-0.0835218	0.808789	0.0422554	0.255125	0.655009	0.0604339	0.469915	0.677705	0.0752188	0.436556	0.913158	0.0181785	0.114685	O88531
6.96557807922363	7.33877515792847	7.35909509658813	6.65894746780396	7.3579158782959	6.83313226699829	6.7489161491394	7.31645250320435	7.30061721801758	6.93639707565308	7.91081190109253	6.62463569641113	7.38542747497559	7.09784126281738	6.58489751815796									2	2	2	8.1	8.1	8.1	29.8	0.0022883	4.5279	230820000	10	0.945293	-0.0164948	-0.0715401	0.373712	0.30201	0.976393	0.560402	-0.157398	-0.616192	0.593545	-0.140904	-0.56345	0.222443	-0.459408	-1.39279	O88696
6.73770141601563	7.62111377716064	7.65576267242432	6.49035120010376	7.15922212600708	7.57227897644043	7.07391023635864	6.4267749786377	6.23860597610474	6.72859573364258	7.67422342300415	7.69613790512085	6.95478057861328	6.8144383430481	7.3901948928833									4	4	4	15.1	15.1	15.1	44.93	0	29.488	499270000	9	0.86432	-0.0681857	-0.178346	0.644093	-0.245757	-0.491187	0.816644	0.0876557	0.242264	0.634598	0.155841	0.500425	0.469246	0.333413	0.782675	O88986
7.85625743865967	7.97759580612183	8.34368419647217	8.30717468261719	8.18326950073242	8.07990455627441	8.2912130355835	8.11025333404541	8.01828384399414	8.3019847869873	8.24988269805908	8.33837699890137	8.23724174499512	8.36140632629395	8.45132541656494					+	mU1 NR_WT NR			4	4	4	12.5	12.5	12.5	61.341	0	43.643	2386400000	40	0.740283	0.0449821	0.347217	0.685513	0.0688724	0.42939	0.129218	0.22591	1.75819	0.0307114	0.180928	2.81111	0.140073	0.157037	1.75249	O89023
7.0717716217041	7.58639621734619	6.77166366577148	7.39223957061768	7.5656943321228	7.88738107681274	7.46831798553467	6.99753904342651	7.19473648071289	7.31611728668213	7.34966135025024	7.73189496994019	7.63081407546997	8.01940727233887	7.41662406921387							+	mU1 NR_mU1	2	2	2	4.2	4.2	4.2	43.209	0.001269	6.568	537760000	17	0.326925	0.274215	1.06721	0.721816	0.0813206	0.376753	0.0646251	0.494167	2.25913	0.361155	0.219952	0.988333	0.0431324	0.412847	2.69322	P00158
9.05353927612305	8.96081352233887	8.92568874359131	8.96104145050049	8.82670307159424	8.91623306274414	8.93827438354492	9.09874725341797	8.13640308380127	8.84687519073486	9.13049411773682	8.90441226959229	8.70468235015869	8.92938804626465	8.84388065338135									6	6	6	19.1	19.1	19.1	56.909	0	145.91	11905000000	82	0.647354	-0.0302813	-0.481298	0.327445	-0.27068	-1.08499	0.064106	-0.12968	-2.265	0.237383	-0.0993986	-1.3123	0.603311	0.141	0.554206	P00397
10.5106792449951	10.3752431869507	10.4842147827148	10.154727935791	10.3002910614014	10.3780164718628	10.6741256713867	10.6725778579712	9.11190032958984	10.5377941131592	10.5139760971069	10.2945098876953	10.3422842025757	10.1865043640137	10.2401742935181									10	10	10	63.9	63.9	63.9	25.976	0	323.31	466060000000	648	0.362714	0.125036	0.984885	0.457447	-0.326659	-0.804863	0.236505	-0.115348	-1.31508	0.0590813	-0.240385	-2.32453	0.616808	0.211311	0.533086	P00405
7.8937783241272	7.32211589813232	7.43919038772583	7.94428539276123	8.89693355560303	8.86861515045166	7.90288352966309	8.13299560546875	6.95335388183594	7.88786458969116	7.49209451675415	8.97499942779541	9.0015172958374	8.87864780426025	7.82437992095947	+		+	mU1 NR_WT;WT NR_WT			+	mU1 NR_mU1	2	2	2	6.5	6.5	6.5	29.922	0	65.307	4447000000	27	0.0366666	0.800514	2.67733	0.51515	-0.205405	-0.699998	0.0198518	1.02004	3.14853	0.584848	0.219529	0.577117	0.0290658	1.22545	3.03047	P00416
7.65243005752563	6.80747604370117	7.51356363296509	6.7520489692688	6.70333576202393	6.97104358673096	7.29064226150513	6.74761533737183	6.77749443054199	6.78780078887939	7.76557636260986	7.68003606796265	6.75215816497803	6.86401700973511	7.67906427383423									3	3	3	24.1	24.1	24.1	18.08	0	9.6328	437130000	6	0.383994	-0.25322	-0.938961	0.862356	-0.0710891	-0.182504	0.862042	0.0624392	0.181379	0.312127	0.31566	1.10341	0.755318	0.133528	0.32924	P01831
6.4932656288147	7.27827310562134	6.58418846130371	6.77605676651001	7.58971500396729	7.23964977264404	6.42090892791748	7.46071767807007	7.23872327804565	6.97960233688354	7.37462615966797	7.15727519989014	7.30751752853394	7.15928506851196	6.30473327636719									2	2	2	6.6	6.6	6.6	49.971	0.0023202	4.9066	164440000	4	0.257519	0.394802	1.25096	0.129873	0.414705	1.81119	0.514949	0.199257	0.691763	0.594527	-0.195545	-0.561915	0.487035	-0.215448	-0.74998	P01872
8.3231897354126	8.560133934021	8.41185569763184	8.62508583068848	8.77542877197266	8.57068347930908	8.54046726226807	8.58297157287598	8.49665260314941	8.11836433410645	8.15090942382813	8.56904602050781	8.79504489898682	8.75369071960449	8.51554298400879							+	mU1 NR_mU1	7	7	5	62	62	55.6	15.085	0	25.897	5888300000	60	0.165817	0.137321	1.57723	0.144114	-0.224758	-1.73041	0.115656	0.178265	1.83826	0.653795	0.0409434	0.471716	0.0265836	0.403022	3.10891	P01942;P06467
8.06333351135254	8.17128753662109	8.31268501281738	8.11537742614746	8.16136837005615	8.33661937713623	8.30700397491455	8.23225879669189	8.28422737121582	8.18261432647705	8.89846706390381	8.02213954925537	8.32471466064453	8.15884494781494	8.05568408966064									8	8	6	74.1	74.1	52.4	15.84	0	76.022	2802800000	48	0.209316	0.0936418	1.40608	0.202874	0.289432	1.46476	0.779951	-0.0253251	-0.292231	0.180687	-0.118967	-1.51444	0.182874	-0.314757	-1.54556	P02088;CON__P02070;CON__Q3SX09;P02104
8.50282287597656	8.31039619445801	8.43832111358643	8.25621223449707	8.39137649536133	8.48730850219727	8.43695735931396	8.50170230865479	7.84765291213989	8.32919406890869	8.23542785644531	8.21685218811035	8.31500434875488	8.40083122253418	8.36588096618652					+	mU1 NR_WT NR			4	4	4	12.6	12.6	12.6	36.059	0	37.054	4118600000	57	0.258801	0.0773981	1.24719	0.148738	-0.239513	-1.70591	0.479777	-0.0522959	-0.753296	0.0335719	-0.129694	-2.74367	0.215588	0.187217	1.41729	P03888
7.30676794052124	7.37458324432373	7.30272054672241	7.47755527496338	7.5285439491272	7.80767726898193	7.42229413986206	7.40423488616943	6.57079029083252	7.15014219284058	7.64053392410278	7.26240348815918	7.22587776184082	7.08221054077148	6.63498783111572					+	mU1 NR_WT NR			5	5	5	15.3	15.3	15.3	51.881	0	28.373	401090000	17	0.135542	0.175281	1.72363	0.394709	-0.244918	-0.930739	0.0809093	-0.314037	-2.09613	0.0291276	-0.489318	-2.85141	0.832295	-0.0691189	-0.223087	P03911
8.65120983123779	8.59224319458008	8.54074192047119	8.57763004302979	8.43509578704834	8.16518497467041	8.40696620941162	8.40205478668213	8.46472835540771	8.43860530853271	7.36226272583008	8.31005573272705	8.44360733032227	8.1371955871582	8.22608375549316	+		+	mU1 NR_WT;WT NR_WT					3	3	3	8.2	8.2	8.2	68.474	0	25.861	4412400000	49	0.0119124	-0.238131	-3.56103	0.160864	-0.501924	-1.64512	0.00408702	-0.311221	-4.50388	0.450167	-0.0730898	-0.807555	0.569577	0.190703	0.608272	P03921
9.24336051940918	9.23736763000488	9.04544067382813	9.09635353088379	9.23274230957031	9.29309749603271	9.04629993438721	9.11021900177002	8.58335781097412	9.03694820404053	8.67171001434326	9.32085227966309	8.84617042541504	9.19915199279785	9.13871288299561		+		mU1_WT					4	4	4	50.7	50.7	50.7	7.7662	0	20.79	19216000000	37	0.849041	0.0149591	0.198725	0.0299629	-0.391625	-3.00395	0.802481	-0.0294087	-0.26146	0.713839	-0.0443678	-0.384539	0.0814903	0.362217	2.17632	P03930
7.96806240081787	7.69811773300171	7.63221406936646	6.91217756271362	7.65700817108154	6.55017614364624	7.81897783279419	7.76644992828369	8.67436504364014	6.53085803985596	6.99245357513428	7.57507228851318	7.35410833358765	7.99016141891479	8.06896495819092									6	6	6	61.4	61.4	61.4	14.65	0	18.776	1413300000	16	0.790571	-0.10449	-0.277689	0.810457	-0.153417	-0.252842	0.516853	0.194434	0.688513	0.420646	0.298924	0.864264	0.575381	0.347851	0.598831	P04117
8.05396175384521	8.29673099517822	7.95337772369385	8.34803199768066	8.43317794799805	8.56286334991455	7.98181390762329	8.11122894287109	8.03582954406738	8.13046264648438	7.64744710922241	8.5361795425415	8.54327297210693	8.60138607025146	8.13475036621094							+	mU1 NR_mU1	7	7	7	51.3	51.3	51.3	17.069	0	34.79	3008200000	60	0.533641	0.109245	0.66019	0.23546	-0.225113	-1.34816	0.0886362	0.290872	2.03022	0.334126	0.181626	1.05008	0.0333811	0.515984	2.91048	P04247
8.70299053192139	8.75577545166016	8.75382804870605	8.71875858306885	8.59292030334473	8.54113006591797	8.745924949646	8.765549659729	8.45342540740967	8.73979377746582	8.28842830657959	8.59464645385742	8.68732357025146	8.57471370697021	8.57917785644531			+	mU1 NR_WT					12	12	12	16.6	16.6	16.6	103.13	0	58.834	7021400000	115	0.257773	-0.0714569	-1.25021	0.0847825	-0.238956	-2.14497	0.00571491	-0.123873	-4.1954	0.427549	-0.0524158	-0.85075	0.361674	0.115083	1.00352	P04919
9.68459415435791	9.50538063049316	9.40602874755859	9.33791828155518	9.69656562805176	9.6770133972168	9.531005859375	9.63953590393066	9.24985885620117	9.36886310577393	9.2924108505249	9.49070262908936	9.67717838287354	9.59689426422119	9.49331855773926							+	mU1 NR_mU1	29	29	29	86.5	86.5	86.5	39.355	0	323.31	50745000000	407	0.118963	0.15255	1.81792	0.11338	-0.17977	-1.91689	0.391272	0.081043	0.92371	0.265199	-0.0715067	-1.22866	0.00771426	0.260813	4.30016	P05064;P05063
8.56272125244141	8.66639614105225	8.38226890563965	8.3884744644165	8.65858364105225	8.60986137390137	8.45241546630859	8.43786144256592	8.7445821762085	8.44437313079834	8.15011119842529	8.57906341552734	8.58610343933105	8.53663444519043	8.67885494232178									14	14	14	42.6	42.6	42.6	46.247	0	68.599	5572800000	103	0.670939	0.0397153	0.446442	0.759032	-0.0536097	-0.324029	0.255044	0.0951989	1.25826	0.41324	0.0554836	0.878951	0.360503	0.148809	1.0062	P05201
10.7592821121216	10.7577295303345	10.7289867401123	10.6900014877319	10.7042274475098	10.7774925231934	10.6340942382813	10.6254978179932	11.0297899246216	10.6177549362183	10.4032402038574	10.8245487213135	10.6404418945313	10.7827014923096	10.851466178894									54	54	54	91.2	91.2	91.2	47.411	0	323.31	872680000000	1127	0.258144	-0.048672	-1.24912	0.758212	-0.0504049	-0.325178	0.443108	0.0407896	0.820864	0.179118	0.0894616	1.52083	0.601145	0.0911946	0.557621	P05202
8.28659152984619	8.3374195098877	8.29679679870605	8.43917465209961	8.07773113250732	8.24667072296143	8.3993968963623	8.37522411346436	8.29263305664063	8.28512954711914	8.36774730682373	8.33187294006348	8.24902725219727	8.36289691925049	8.3647575378418									9	8	8	30.7	27.1	27.1	36.498	0	59.93	2918100000	49	0.454193	-0.0652399	-0.800033	0.618154	-0.0248257	-0.530994	0.780642	-0.012857	-0.291284	0.529683	0.0523829	0.666815	0.770918	0.0119687	0.307418	P06151;P00342
7.99485349655151	8.01097774505615	7.8192081451416	7.85550117492676	7.60538053512573	7.66692972183228	7.89546680450439	7.7783465385437	8.10917377471924	7.82818269729614	8.33727931976318	7.67013454437256	7.7753701210022	7.6366982460022	8.13567352294922									7	7	4	19.7	19.7	12.4	62.766	0	55.091	1379400000	57	0.0620874	-0.183604	-2.28832	0.262783	0.17141	1.26149	0.387435	-0.115666	-0.931723	0.622477	0.0679382	0.518791	0.177343	-0.287076	-1.56942	P06745
8.76315116882324	8.83356761932373	8.59859371185303	8.56098175048828	8.51307106018066	8.40688037872314	8.5067081451416	8.70406436920166	8.33644008636475	8.47261047363281	8.29349517822266	8.47568607330322	8.53946495056152	8.36681461334229	8.4389533996582		+	+	mU1 NR_WT;mU1_WT					14	14	14	54.9	54.9	54.9	43.044	0	148.67	5604300000	85	0.132962	-0.156393	-1.73754	0.0155707	-0.321558	-3.59832	0.0200693	-0.233844	-3.13994	0.322128	-0.0774512	-1.07879	0.217103	0.0877145	1.41181	P07310
6.72362375259399	6.79189538955688	7.62549781799316	6.4858660697937	7.41916227340698	6.66332292556763	7.87288999557495	7.59946823120117	7.94194841384888	7.19242811203003	7.57623910903931	7.42621850967407	7.76394414901733	7.13084840774536	7.58306264877319									2	2	2	7.4	7.4	7.4	38.676	0	12.02	545160000	15	0.227949	0.48199	1.34265	0.112637	0.663484	1.92201	0.090337	0.569298	2.0165	0.774897	0.0873076	0.299177	0.711782	-0.0941868	-0.391174	P07356
9.65491771697998	9.61256122589111	9.48959255218506	9.50659942626953	8.99242496490479	8.93942928314209	9.11766910552979	9.20352268218994	9.72690677642822	9.36518859863281	9.442307472229	9.26918601989746	8.97530269622803	9.23466873168945	9.51728820800781	+		+	mU1 NR_WT;WT NR_WT					36	36	35	70.1	70.1	70.1	68.692	0	323.31	42266000000	374	0.000433763	-0.502656	-6.96911	0.621718	-0.0544501	-0.52547	0.0362467	-0.316806	-2.68597	0.190635	0.18585	1.4751	0.162507	-0.262356	-1.63724	P07724
6.69496917724609	6.74330234527588	6.99072074890137	7.16354894638062	7.7627911567688	7.30830812454224	7.30835103988647	7.05739974975586	6.94715929031372	6.95982789993286	7.21180772781372	7.17877578735352	7.32308721542358	7.56387233734131	7.13155460357666	+		+	mU1 NR_WT;WT NR_WT					8	2	2	22.8	4.9	4.9	45.823	0.00125	6.3011	271410000	8	0.045611	0.461077	2.51472	0.384314	0.141463	0.953089	0.0337914	0.401187	2.73875	0.745456	-0.05989	-0.339982	0.113767	0.259724	1.91423	Q00896;P07758
7.02200841903687	6.88050413131714	6.56808090209961	6.73918390274048	7.9288158416748	7.91603803634644	8.05269432067871	6.77622270584106	6.7463583946228	6.89999580383301	7.44524669647217	7.76335287094116	8.00569534301758	8.30631732940674	7.82885980606079	+		+	mU1 NR_WT;WT NR_WT			+	mU1 NR_mU1	6	6	5	22.2	22.2	18.7	46.879	0	37.216	731450000	10	0.0330894	0.865998	2.7546	NaN	0	NaN	0.000280496	1.17361	7.54829	0.377279	0.307614	0.953234	0.00897888	0.945523	4.14208	P07759;Q03734;P29621;Q5I2A0
7.41690683364868	6.50609970092773	6.51948738098145	7.45803308486938	7.07658052444458	6.47738313674927	7.35203075408936	6.69711399078369	7.74493408203125	6.5013256072998	7.56611776351929	6.89435243606567	6.72039937973022	7.05090951919556	8.03084278106689									3	3	3	18.9	18.9	18.9	25.958	0.0012315	6.1521	577040000	4	0.829495	-0.0743546	-0.224935	0.542905	0.295661	0.652462	0.633873	0.198994	0.501518	0.467164	0.273349	0.776111	0.846896	-0.0966665	-0.203326	P08074
8.53930187225342	8.53462219238281	8.43418598175049	8.54942035675049	8.98824214935303	8.78394603729248	8.66311645507813	8.6832275390625	8.71317958831787	8.51417541503906	8.34760284423828	8.97580814361572	8.88771820068359	8.66064739227295	8.65628051757813	+		+	mU1 NR_WT;WT NR_WT					8	8	8	63	63	63	15.942	0	75.161	7506300000	90	0.0153616	0.26525	3.35303	0.914549	0.0106033	0.112838	0.0165748	0.280731	3.29188	0.89261	0.0154805	0.140835	0.0929158	0.270128	2.07274	P08228
11.2357301712036	11.2316226959229	11.2328691482544	11.2339344024658	11.2455615997314	11.2429141998291	11.3850164413452	11.3046846389771	11.2587089538574	11.2965993881226	11.0816354751587	11.2672424316406	11.2891654968262	11.3361196517944	11.3343935012817			+	mU1 NR_WT					46	46	46	76.9	76.9	76.9	35.611	0	323.31	2648300000000	1792	0.117283	0.0610051	1.82818	0.717562	-0.0212245	-0.382856	0.00519397	0.0731912	4.28204	0.756067	0.0121861	0.325204	0.170396	0.0944157	1.60045	P08249
8.36793327331543	8.12067222595215	8.2821683883667	8.28564739227295	8.00736331939697	8.21274662017822	8.47564220428467	8.46266746520996	8.34867477416992	8.27941608428955	8.38571357727051	8.23729228973389	8.31312847137451	8.45574283599854	8.37821578979492									13	13	12	45.6	45.6	42.5	40.489	0	103.16	2897700000	77	0.84293	0.0254996	0.206902	0.317775	0.0738295	1.10932	0.283368	0.0819895	1.17808	0.657444	0.0564899	0.466308	0.898655	0.00816003	0.133965	P08752;B2RSH2;Q9DC51;P18872;P20612;Q3V3I2;P50149;Q8CGK7
8.36331081390381	8.23547840118408	8.29263305664063	8.13924884796143	8.37234115600586	8.32209491729736	8.41805267333984	8.34652900695801	8.05514907836914	8.15262508392334	8.1174373626709	8.42509365081787	8.4794750213623	8.29631423950195	8.2342643737793							+	mU1 NR_mU1	12	12	12	24.2	24.2	24.2	88.231	0	84.516	2967300000	92	0.0832643	0.107087	2.07539	0.0578176	-0.149264	-2.45167	0.219415	0.101119	1.3711	0.924206	-0.00596762	-0.0992067	0.0168279	0.250383	3.52507	P09055
7.27932453155518	6.94331884384155	6.63186740875244	7.34894704818726	6.85635471343994	6.3066930770874	7.24593448638916	7.34386157989502	7.58614826202393	6.71795463562012	7.50927066802979	7.36344289779663	7.1638765335083	7.46371364593506	7.86683082580566									4	4	4	7.3	7.3	7.3	57.058	0.0012804	6.8722	293170000	7	0.708863	-0.112653	-0.391629	0.500688	0.22026	0.725463	0.111557	0.413602	1.8643	0.107176	0.526255	1.8932	0.535455	0.193341	0.665059	P09103
8.00130081176758	7.9441123008728	7.74801731109619	7.80567741394043	8.02469062805176	7.95681190490723	7.950355052948	7.91700124740601	8.10944366455078	7.63921737670898	7.76192474365234	7.9617862701416	7.88217735290527	7.97133159637451	7.92388105392456									9	9	9	36	36	36	44.55	0	38.622	1251200000	41	0.215132	0.0874377	1.38575	0.792897	-0.037915	-0.276958	0.372735	0.0600171	0.963004	0.401389	-0.0274206	-0.902866	0.45242	0.0979321	0.814445	P09411;P09041
7.6441330909729	7.45659351348877	7.67517328262329	7.67453050613403	7.9106297492981	8.09569263458252	8.12070560455322	8.06989002227783	7.66925191879272	7.61270952224731	8.42564868927002	7.82833766937256	7.7639594078064	8.27135372161865	8.17146301269531	+		+	mU1 NR_WT;WT NR_WT					10	10	10	11	11	11	150.92	0	32.192	1082300000	42	0.000828752	0.436622	6.17541	0.259247	0.289929	1.27223	0.0266538	0.396171	2.91935	0.772602	-0.040451	-0.302337	0.704593	0.106242	0.401564	P09470
7.30663967132568	7.38057279586792	7.42665767669678	7.11407709121704	7.16178703308105	6.82332324981689	6.89919090270996	6.89784145355225	7.22701215744019	7.04461812973022	7.49376153945923	6.01185512542725	7.09978437423706	7.08945417404175	6.88971614837646	+			WT NR_WT					3	3	3	17	17	17	21.066	0.0024038	5.6828	201830000	10	0.011797	-0.361451	-3.5691	0.719037	-0.0518562	-0.380739	0.092496	-0.534284	-1.99946	0.543781	-0.172833	-0.64336	0.197117	-0.482428	-1.4872	P09528
8.63615703582764	8.7746114730835	8.61944770812988	8.36473846435547	8.92099380493164	8.73476791381836	8.37535285949707	8.57132434844971	8.02938365936279	8.52573108673096	8.57894897460938	8.63519191741943	8.71706295013428	8.19981002807617	8.54463863372803									12	12	12	80.9	80.9	80.9	22.421	0	137.7	6105400000	90	0.731502	0.0518711	0.359547	0.269748	-0.220717	-1.24072	0.618853	-0.0745628	-0.524321	0.466456	-0.126434	-0.777405	0.49533	0.146155	0.735027	P09542;P05977;P09541
9.69678401947021	9.82436656951904	9.67657470703125	9.71560192108154	9.85070705413818	9.84989833831787	9.63963603973389	9.53995418548584	9.90617370605469	9.67118167877197	9.33640003204346	9.76348781585693	9.72902679443359	9.79623413085938	9.80745410919189									20	20	20	72.5	72.5	72.5	24.603	0	323.31	88313000000	322	0.925198	-0.0082829	-0.0979034	0.556899	-0.0904133	-0.629106	0.267641	0.0457189	1.22169	0.52423	0.0540018	0.675994	0.375167	0.136132	0.973163	P09671
8.15155410766602	8.07664012908936	8.04004859924316	7.79131174087524	7.82592582702637	7.77166843414307	7.94543409347534	8.0154857635498	8.16967487335205	7.93285894393921	7.43652629852295	8.15866374969482	6.74632835388184	7.70841217041016	8.12755870819092									4	4	4	19.3	19.3	19.3	34.798	0	54.725	1439000000	24	0.238723	-0.12526	-1.30808	0.444153	-0.168535	-0.830377	0.36774	-0.329648	-0.973852	0.56305	-0.204388	-0.611911	0.723015	-0.161113	-0.375037	P09925
6.6030592918396	7.3627347946167	6.77425193786621	7.0463924407959	7.17772245407104	7.7211012840271	7.45150995254517	6.75358295440674	6.76337671279907	7.07698345184326	7.45155000686646	7.13761758804321	7.90644836425781	6.19614315032959	6.94350290298462									2	2	2	0.7	0.7	0.7	511.56	0.0099602	2.7375	490770000	4	0.260181	0.32937	1.24316	NaN	0	NaN	0.806825	0.0993184	0.255562	0.592878	-0.230051	-0.564493	0.913129	-0.0513754	-0.114723	P0C6F1
7.52726888656616	7.52390241622925	7.26503038406372	7.48730802536011	7.88686847686768	7.81155490875244	7.50516366958618	7.63171768188477	7.27696704864502	6.85391283035278	7.62673711776733	7.53630590438843	7.8249454498291	7.82939386367798	7.48785924911499									3	3	3	26.6	26.6	26.6	14.728	0	18.745	547120000	16	0.0520967	0.257949	2.4167	0.369241	-0.198338	-0.986382	0.0959407	0.218749	1.97307	0.766021	-0.0392001	-0.311416	0.11138	0.417087	1.93077	P62984;P62983;P0CG49;P0CG50
7.54226493835449	7.7282075881958	7.93196105957031	7.69457006454468	7.68649339675903	8.07066535949707	7.54507207870483	7.82841491699219	6.85141611099243	7.73244190216064	7.3755259513855	7.46566534042358	7.59432601928711	7.7228479385376	7.66295623779297									3	3	3	66.7	66.7	66.7	6.954	0	11.424	753250000	18	0.686449	0.0584105	0.423851	0.144681	-0.404456	-1.72737	0.290681	-0.112802	-1.1585	0.219661	-0.171213	-1.37027	0.249319	0.291654	1.3031	P0DN34
8.18346881866455	8.36573123931885	8.59676170349121	8.42618560791016	8.48408603668213	8.43039798736572	8.44512176513672	8.46149826049805	8.36709499359131	8.47535133361816	8.45847129821777	8.62571334838867	8.55624198913574	8.5941162109375	8.56684970855713					+	mU1 NR_WT NR	+	mU1 NR_mU1	11	11	11	31	31	31	37.279	0	125.27	5000500000	108	0.496724	0.0622392	0.72328	0.714256	0.0406024	0.38761	0.0679139	0.192693	2.22303	0.000516607	0.130454	6.74731	0.00624924	0.152091	4.52585	P10605
7.64923763275146	7.68400096893311	7.41650724411011	7.62306308746338	8.08810043334961	8.12188816070557	7.57308053970337	7.49726152420044	7.36990213394165	7.59274291992188	7.36583232879639	7.23291969299316	7.38483715057373	7.47353076934814	7.24765396118164			+	mU1 NR_WT	+	mU1 NR_WT NR			4	4	4	12.9	12.9	12.9	53.109	0	21.061	618640000	26	0.24479	0.22688	1.28922	0.173971	-0.150376	-1.58433	0.0210172	-0.258467	-3.10369	0.0323357	-0.485347	-2.77203	0.295575	-0.10809	-1.1677	P11152
7.94551801681519	7.98790311813354	8.30386543273926	8.19598293304443	7.34941911697388	7.8602123260498	8.26749992370605	8.34713459014893	8.17152214050293	8.46924781799316	8.22801494598389	8.25435447692871	8.0015172958374	8.41210746765137	8.35416603088379									7	7	7	56.2	56.2	56.2	22.329	0	51.133	2277200000	25	0.555507	-0.152251	-0.624141	0.210972	0.181278	1.43421	0.281388	0.147219	1.18346	0.269085	0.29947	1.2176	0.806314	-0.0340587	-0.258515	P11352
8.95933723449707	9.00393390655518	9.03370475769043	8.86442756652832	8.69304084777832	8.81972789764404	8.85534954071045	8.93206787109375	9.22151851654053	8.81752586364746	8.98279094696045	9.1079216003418	9.01380634307861	9.05861568450928	9.11644172668457			+	mU1 NR_WT	+	mU1 NR_WT NR			9	9	9	63.2	63.2	63.2	14.819	0	83.317	16302000000	164	0.0644588	-0.140304	-2.26101	0.712352	0.0419276	0.390352	0.0480803	0.108845	2.47577	0.00406443	0.24915	4.50909	0.541075	0.0669179	0.655547	P11404
7.67422723770142	7.2772421836853	7.61806917190552	7.79269981384277	7.83159446716309	7.36119890213013	7.46301174163818	7.62149810791016	7.43126726150513	7.63323593139648	8.30118179321289	7.6200008392334	7.5272045135498	7.587890625	7.43972730636597									5	5	5	13.3	13.3	13.3	43.865	0	28.867	749690000	23	0.892635	-0.0212338	-0.140801	0.474075	0.198002	0.773712	0.70385	-0.0468538	-0.398795	0.823445	-0.02562	-0.233083	0.325882	-0.244856	-1.08888	P11438
7.71247291564941	7.73400735855103	7.78111600875854	7.97401857376099	7.72532367706299	7.83775901794434	7.78443193435669	7.68302917480469	8.03382587432861	7.78219318389893	7.71658802032471	7.71557712554932	7.86688375473022	7.90677642822266	7.82585430145264									5	5	3	7.9	7.9	4.3	83.28	0	14.934	958040000	16	0.555705	-0.0427678	-0.623819	0.700108	0.0437986	0.408071	0.70896	0.0283692	0.391491	0.2305	0.071137	1.33434	0.876618	-0.0154295	-0.16338	P11499
7.44002723693848	7.09210300445557	7.33397102355957	7.40457725524902	7.4913477897644	7.51478672027588	7.37615728378296	7.39745330810547	6.82317590713501	7.4335298538208	7.70590925216675	7.39299583435059	7.46896743774414	7.55686902999878	7.42725896835327									4	4	4	1.4	1.4	1.4	425.83	0	9.8877	390010000	15	0.187116	0.127267	1.48879	0.989752	0.00320204	0.0134985	0.145289	0.143853	1.67333	0.747449	0.0165865	0.337201	0.554765	0.140651	0.632644	P11531
9.52645587921143	9.46362400054932	9.36917877197266	9.33539772033691	9.36076354980469	9.44382572174072	9.49899959564209	9.46967506408691	9.19802474975586	9.20938110351563	9.4072380065918	9.39675712585449	9.43684577941895	9.50041484832764	9.25638103485107									6	6	6	54.8	54.8	54.8	16.101	0	75.717	34914000000	110	0.72285	0.0196519	0.371756	0.104614	-0.152116	-1.97973	0.713461	-0.0260644	-0.385077	0.47234	-0.0457163	-0.766698	0.191448	0.126052	1.50992	P12787
7.05555295944214	7.07960224151611	6.72623682022095	6.91692972183228	6.71160840988159	6.70634031295776	7.53482532501221	6.57228994369507	6.89189481735229	6.96726512908936	7.27612352371216	6.70551538467407	7.42419528961182	7.51784229278564	6.78919553756714									2	2	2	5.6	5.6	5.6	58.844	0.0053591	3.5953	219240000	5	0.796372	-0.0633144	-0.269775	NaN	0	NaN	0.493037	0.164607	0.72975	0.482625	0.227921	0.7482	0.820316	0.0640926	0.239377	P13597
9.43727493286133	9.3181676864624	9.26230907440186	9.29245567321777	9.63555431365967	9.73647594451904	9.33241844177246	9.32854270935059	8.89745140075684	9.34445095062256	8.91449642181396	9.40512466430664	9.45289039611816	9.44298076629639	9.15962696075439									16	16	16	53.6	53.6	53.6	35.194	0	122.13	37004000000	193	0.156155	0.180696	1.62095	0.088536	-0.275419	-2.11076	0.651588	0.0376039	0.474993	0.297784	-0.143092	-1.13989	0.0869056	0.313023	2.12543	P14094
8.29653358459473	8.26157188415527	8.53127479553223	8.22432613372803	8.05419158935547	7.9104962348938	8.49182415008545	8.29207897186279	8.38455009460449	8.36000633239746	7.00137281417847	8.26883506774902	8.14718151092529	8.45178604125977	8.27991771697998									4	4	4	15.1	15.1	15.1	54.755	0	24.145	3612000000	33	0.370348	-0.141279	-0.968173	0.339111	-0.413117	-1.05645	0.672224	-0.0414965	-0.44456	0.511227	0.0997823	0.698138	0.38384	0.37162	0.954121	P14142
7.15250253677368	7.03620338439941	7.10815906524658	6.62328243255615	7.19755172729492	6.71468067169189	6.55314350128174	7.17078971862793	7.16675567626953	6.74837255477905	7.31084251403809	6.89201402664185	6.44602966308594	6.96806955337524	7.19562292098999									2	2	2	7	7	7	31.419	0	11.559	116590000	7	0.738051	-0.0709955	-0.350345	0.655897	0.0952867	0.473367	0.616951	-0.104603	-0.52723	0.886571	-0.0336074	-0.148821	0.43068	-0.19989	-0.856831	P14148
8.37023544311523	8.50730228424072	8.29861259460449	8.19606590270996	8.11280632019043	8.18329811096191	8.12116527557373	7.97725248336792	8.56979465484619	8.17998218536377	7.91408920288086	8.32343769073486	8.11109447479248	8.47953224182129	8.50898742675781	+			WT NR_WT	+	mU1 NR_WT NR			10	10	10	38.3	38.3	38.3	36.511	0	53.897	3342300000	58	0.0207291	-0.244424	-3.11452	0.522317	-0.121765	-0.68756	0.913493	0.0127089	0.113294	0.0436737	0.257132	2.54688	0.515727	0.134474	0.698993	P14152
7.43601942062378	7.46765232086182	7.56432294845581	7.62605285644531	7.65798282623291	7.78468132019043	7.36155796051025	7.5497875213623	7.48135662078857	7.7194390296936	7.54274034500122	7.44639730453491	7.35040330886841	7.48340177536011	7.63944673538208									5	5	5	11.8	11.8	11.8	47.994	0	14.841	536710000	16	0.538629	0.0649905	0.651886	0.498237	0.0576668	0.72983	0.578921	-0.0435996	-0.586501	0.353019	-0.10859	-1.00652	0.325241	-0.101266	-1.09048	P14211
7.29928922653198	7.28840589523315	7.33041381835938	6.65065860748291	7.24259090423584	7.2717719078064	7.13744592666626	6.96157073974609	7.57913160324097	7.24044942855835	7.74758529663086	7.10822677612305	7.38089847564697	7.27822732925415	7.46821451187134									3	3	3	11.4	11.4	11.4	34.216	0.0012987	7.3586	299570000	12	0.952194	0.011153	0.062501	0.160385	0.380197	1.64744	0.393555	0.1667	0.918969	0.186834	0.155547	1.4899	0.226146	-0.213497	-1.37985	P14869
8.30079078674316	8.12001419067383	8.02477264404297	7.9022421836853	8.55879211425781	8.40389251708984	8.27843379974365	8.29426765441895	6.72389650344849	7.97730731964111	7.61769008636475	8.2027063369751	8.24482154846191	8.24669551849365	8.02861213684082	+			WT NR_WT	+	mU1 NR_WT NR			9	9	9	14.2	14.2	14.2	99.795	0	50.785	2270600000	39	0.031178	0.296892	2.79966	0.104828	-0.647324	-1.97813	0.378818	0.0937539	0.949945	0.0495204	-0.203138	-2.45401	0.0669932	0.741078	2.33261	P15116
8.02840900421143	8.09433174133301	8.37513256072998	8.10068035125732	8.26204776763916	8.2210750579834	8.29976844787598	8.22479152679443	7.91449642181396	8.16348934173584	8.12678050994873	8.33969020843506	8.4137020111084	8.34123706817627	8.08084297180176									4	4	4	39.3	39.3	39.3	14.866	0	57.723	2429600000	53	0.243531	0.102282	1.2931	0.4993	-0.081383	-0.727933	0.222892	0.14423	1.35939	0.59795	0.0419474	0.556572	0.0913078	0.225613	2.08647	P16045
8.71198463439941	8.78756713867188	8.62109279632568	8.62380695343018	8.78906536102295	8.8242301940918	8.58315372467041	8.67146873474121	8.4368782043457	8.56534004211426	8.88188076019287	8.63928699493408	8.65386867523193	8.63298320770264	8.50697803497314									14	14	13	50.3	50.3	46.7	36.572	0	109.28	6803700000	108	0.666573	0.0308666	0.452847	0.649555	-0.0580799	-0.482919	0.188189	-0.0778337	-1.48459	0.145135	-0.1087	-1.6741	0.873335	-0.0197538	-0.167776	P16125
8.63211250305176	8.72618103027344	8.77836132049561	8.61026573181152	8.51940822601318	8.38850975036621	8.71423721313477	8.63492012023926	8.72775268554688	8.66016292572021	8.20496082305908	8.68135929107666	8.46073246002197	8.68324565887451	8.63976573944092									18	18	18	37.6	37.6	37.6	82.843	0	84.509	6808800000	110	0.182358	-0.122461	-1.5077	0.332102	-0.155771	-1.0735	0.326709	-0.0704544	-1.06773	0.577932	0.052007	0.588071	0.596223	0.085317	0.56541	P16332
6.92415523529053	7.02209520339966	6.81404590606689	6.78349256515503	6.69598388671875	6.91176462173462	6.88112211227417	6.97294759750366	6.38607931137085	7.2560887336731	7.43253612518311	6.85007619857788	7.14807796478271	7.14584875106812	6.99397134780884									3	3	3	3.5	3.5	3.5	107.96	0.0023529	5.2786	86052000	7	0.808236	-0.0204927	-0.253648	0.638638	0.138954	0.499482	0.148904	0.148546	1.65549	0.118767	0.169039	1.81911	0.974313	0.00959218	0.0338408	P16406
7.96834278106689	7.66476392745972	7.56108951568604	6.76118087768555	7.61697912216187	7.49386215209961	7.69635629653931	7.97927045822144	7.60639190673828	7.6131649017334	7.48244953155518	7.40342950820923	7.68410015106201	6.82871246337891	7.12895917892456									13	13	13	7.5	7.5	7.5	284.59	0	36.557	719870000	17	0.482067	0.207773	0.749197	0.808223	0.0784912	0.255899	0.498714	-0.227544	-0.719801	0.0839438	-0.435317	-2.06951	0.222732	-0.306035	-1.39177	P16546
6.87739610671997	7.24821853637695	7.29314136505127	7.45694255828857	7.32403516769409	7.40621662139893	7.43858957290649	7.48040962219238	7.40879964828491	7.69837045669556	7.24853706359863	7.65685510635376	7.51922416687012	7.84513521194458	7.77135944366455			+	mU1 NR_WT	+	mU1 NR_WT NR			4	4	4	9.7	9.7	9.7	53.844	0	12.836	503970000	20	0.177951	0.193388	1.52562	0.256465	0.232978	1.28077	0.0147453	0.479219	3.38616	0.0107865	0.285831	3.64375	0.135772	0.246241	1.77669	P16675
9.27728843688965	9.20512294769287	9.28549003601074	8.91086483001709	9.23327541351318	9.15225791931152	9.33368873596191	9.48191547393799	9.22068309783936	9.0901517868042	9.30728244781494	9.18289947509766	9.31729030609131	9.34853839874268	9.24184513092041									16	16	16	55.9	55.9	55.9	35.81	0	239.9	28699000000	184	0.292478	0.130593	1.15376	0.768394	0.0363475	0.310937	0.323547	0.102952	1.07535	0.742242	-0.0276411	-0.344475	0.377886	0.0666042	0.967154	P16858;Q64467
7.98370313644409	7.82539367675781	8.08206653594971	7.87898683547974	7.97416591644287	7.93683052062988	8.14267063140869	7.99797582626343	8.01334285736084	7.94095945358276	8.04746913909912	7.87745761871338	7.678955078125	8.12622928619385	8.27815914154053									4	4	4	8	8	8	45.681	0	9.3747	1441300000	35	0.369906	0.0703732	0.969134	0.458624	0.0580529	0.802631	0.752429	0.0476627	0.330261	0.876501	-0.0227104	-0.162163	0.950456	-0.0103902	-0.0653125	P17047
7.70628261566162	7.64678573608398	7.68539237976074	7.73237752914429	7.57926893234253	7.80890607833862	7.80420064926147	7.55441665649414	7.52495384216309	7.76974630355835	7.25091981887817	7.73961210250854	7.73874092102051	7.86722564697266	7.75959253311157									5	5	5	13.8	13.8	13.8	52.609	0	16.984	714770000	17	0.935915	-0.00601149	-0.0838349	0.22164	-0.177503	-1.39562	0.0573192	0.0835832	2.34666	0.282358	0.0895947	1.18082	0.101909	0.261086	2.00023	Q63836;P17563
7.61083030700684	7.51537036895752	7.61793279647827	6.85754871368408	7.3356294631958	7.88926792144775	7.62057304382324	6.78432893753052	6.43295907974243	7.48338747024536	7.72546005249023	7.78278064727783	7.63879871368408	7.73515176773071	7.51923704147339									3	3	3	50.8	50.8	50.8	7.3325	0.001328	7.8787	483930000	7	0.981987	0.00702929	0.0235346	0.657474	-0.186485	-0.471	0.210388	0.268571	1.4023	0.324117	0.261542	1.07397	0.237167	0.455057	1.34248	P17665
9.43771934509277	9.38438892364502	9.21666717529297	9.37745189666748	9.08525466918945	9.22110080718994	9.17886161804199	9.23337650299072	9.63367080688477	9.31475162506104	9.29245567321777	9.27088832855225	9.04606533050537	9.1937084197998	9.36187839508057	+			WT NR_WT					46	46	38	47.3	47.3	42	108.3	0	323.31	33993000000	359	0.0243536	-0.174408	-2.98894	0.605415	0.0595692	0.550896	0.149116	-0.135922	-1.65446	0.625342	0.0384867	0.514432	0.168526	-0.195491	-1.60902	P17710
8.17920684814453	8.08632469177246	8.24985885620117	8.07827568054199	8.27565670013428	8.16554069519043	8.40279388427734	8.52632617950439	8.49555778503418	8.24435138702393	8.35707664489746	8.37917900085449	8.48094081878662	8.5098876953125	8.55142593383789		+	+	mU1 NR_WT;mU1_WT					6	6	6	58.5	58.5	58.5	17.971	0	55.395	3283100000	50	0.0698233	0.194163	2.20289	0.0380885	0.217245	2.79789	0.00092676	0.331942	6.04582	0.161483	0.137779	1.59653	0.185249	0.114696	1.53553	P17742
8.37916088104248	8.49562740325928	8.4337854385376	8.30618858337402	8.45662403106689	8.25326538085938	8.23716640472412	8.31384658813477	8.48543739318848	8.38057327270508	8.47948932647705	8.38656997680664	8.34564781188965	8.35412788391113	8.44661521911621									11	11	11	52.5	52.5	52.5	32.191	0	67.6	3989400000	57	0.217133	-0.088465	-1.37887	0.456148	0.0448094	0.807331	0.674364	-0.0204504	-0.441432	0.261936	0.0680146	1.23806	0.157548	-0.0652598	-1.66128	P17751
8.99275207519531	8.94650173187256	9.39839172363281	9.19304084777832	9.14556884765625	9.07765865325928	9.41914558410645	9.33833694458008	9.18830966949463	9.28162384033203	9.33849620819092	9.23754405975342	9.15097141265869	9.42214679718018	9.52438354492188									18	18	18	48.8	48.8	48.8	44.953	0	323.31	27274000000	218	0.422866	0.112506	0.859901	0.333328	0.136805	1.07049	0.183968	0.20109	1.50125	0.476973	0.0885839	0.758332	0.574518	0.0642849	0.600231	P18242
8.79962348937988	8.58458042144775	8.56903457641602	8.47506046295166	9.09537887573242	8.91538429260254	8.67687606811523	8.70255088806152	8.17096519470215	8.6129322052002	8.41512393951416	8.79235649108887	8.9904146194458	8.79489898681641	8.55091285705566									7	7	7	22.6	22.6	22.6	42.444	0	54.561	7995100000	79	0.0917981	0.240473	2.00492	0.18303	-0.207401	-1.5449	0.172687	0.175071	1.54759	0.641156	-0.0654018	-0.490567	0.0522188	0.382472	2.53487	P18572
7.14903450012207	6.78930807113647	6.92353916168213	6.69648027420044	7.74589395523071	7.52218341827393	7.35067415237427	7.32280111312866	6.96371221542358	6.05607509613037	7.4287633895874	7.35684776306152	7.75863933563232	7.64194011688232	6.51750183105469	+			WT NR_WT					1	1	1	9.3	9.3	9.3	18.42	0.0013245	7.8624	300400000	14	0.00505298	0.595798	4.30718	0.845069	-0.0734069	-0.205794	0.198368	0.429142	1.4458	0.594466	-0.166656	-0.562009	0.336451	0.502549	1.06288	P19123
8.20498752593994	8.04805278778076	8.29909324645996	7.73326969146729	7.76688098907471	7.70507669448853	8.19128322601318	8.24316215515137	7.84697389602661	8.28650093078613	7.43039751052856	7.91299200057983	7.98875951766968	7.5558557510376	7.9803581237793									4	4	4	31.8	31.8	31.8	19.686	0	50.578	1730600000	33	0.630369	-0.09475	-0.506811	0.431748	-0.216727	-0.854711	0.236175	-0.211859	-1.31613	0.52483	-0.117109	-0.674982	0.984592	0.00486724	0.0202965	P19258
7.19849395751953	6.90142583847046	7.36804485321045	6.55012178421021	6.7576208114624	7.14404439926147	6.39976787567139	7.53974103927612	6.6274094581604	7.14560031890869	7.93874073028564	6.61403322219849	6.83442640304565	6.80676889419556	6.92802953720093									2	2	2	7.2	7.2	7.2	46.533	0	8.6574	237680000	6	0.889223	-0.0442281	-0.145312	0.570248	0.232729	0.607178	0.317072	-0.208707	-1.09115	0.541931	-0.164479	-0.646415	0.236676	-0.441436	-1.34411	P19324
9.36655330657959	9.36886310577393	9.20809173583984	9.1575174331665	9.18378257751465	9.21674633026123	9.09652805328369	9.08044624328613	8.53674793243408	9.24753093719482	9.01824283599854	9.15579128265381	9.06231880187988	9.1380500793457	8.9634952545166			+	mU1 NR_WT					8	8	8	51.6	51.6	51.6	13.813	0	103.72	23423000000	191	0.0855531	-0.130881	-2.05579	0.127227	-0.341082	-1.82719	0.0312277	-0.195343	-2.79845	0.284809	-0.0644619	-1.17419	0.461305	0.14574	0.797562	P19536
9.53514194488525	9.46603679656982	9.3203125	9.33671951293945	9.52976417541504	9.61068153381348	9.34040451049805	9.32980442047119	9.20817279815674	9.26249885559082	8.8342170715332	9.4248161315918	9.45429611206055	9.507248878479	9.24863529205322									14	14	14	64.5	64.5	64.5	19.53	0	130.26	43311000000	180	0.676534	0.038111	0.438264	0.0585876	-0.312923	-2.44092	0.941818	-0.00580359	-0.076094	0.64136	-0.0439146	-0.49026	0.0655694	0.30712	2.34989	P19783
9.08289337158203	9.04387283325195	9.12616348266602	8.98126983642578	9.37180614471436	9.27512741088867	9.16961574554443	9.21042537689209	8.96920585632324	9.02436256408691	8.7092866897583	9.25214862823486	9.36289691925049	9.25478935241699	8.9817008972168	+			WT NR_WT					35	35	34	57.7	57.7	57.7	72.421	0	285.23	22008000000	328	0.0102393	0.198194	3.68748	0.137001	-0.157598	-1.7697	0.126039	0.154334	1.77619	0.651973	-0.0438597	-0.474422	0.056009	0.311932	2.47755	P20029
9.78360366821289	9.81582355499268	9.83541774749756	9.66622734069824	9.48439979553223	9.50433444976807	9.56487941741943	9.60246181488037	10.0186586380005	9.72322559356689	9.60612297058105	9.67780780792236	9.3658618927002	9.62198638916016	9.85194301605225	+			WT NR_WT					22	22	22	59.1	59.1	59.1	28.127	0	323.31	84659000000	318	0.00229815	-0.236249	-5.06551	0.949897	0.00740099	0.066051	0.223521	-0.145868	-1.35729	0.419007	0.0903809	0.867498	0.374293	-0.153269	-0.975103	P20108
7.84183502197266	8.06344604492188	7.94011783599854	8.10191917419434	6.56337690353394	7.91994571685791	6.77766942977905	6.6280722618103	8.13286781311035	7.92825746536255	7.660231590271	7.78393936157227	6.55258417129517	7.83530378341675	7.90127277374268	+			WT NR_WT					8	8	7	25.3	25.3	21.2	47.024	0	23.32	1144000000	16	0.0204252	-1.01456	-3.12612	0.57876	-0.0797106	-0.593362	0.203315	-0.468554	-1.42761	0.274283	0.546009	1.20301	0.37424	-0.388844	-0.97522	P21550;P17183
7.25394344329834	7.23019361495972	7.22008180618286	7.20319366455078	7.44094038009644	7.49000072479248	6.76963138580322	7.23633098602295	6.96507835388184	6.88724851608276	7.36772871017456	7.42892789840698	7.41254472732544	7.52851819992065	6.94009208679199									5	5	5	12.3	12.3	12.3	51.24	0	10.158	252610000	12	0.965739	0.00737274	0.0447755	0.274783	-0.153501	-1.22601	0.474865	0.100668	0.76213	0.673234	0.0932949	0.443083	0.258587	0.254169	1.27425	P21956
8.55685710906982	8.61367225646973	8.79649066925049	8.78481674194336	8.69779586791992	8.68321800231934	8.56463050842285	8.58070850372314	8.35606384277344	8.88034439086914	8.29716968536377	8.78573513031006	8.60663890838623	8.6314640045166	8.65185928344727									14	14	14	45	45	45	47.13	0	94.393	7190300000	112	0.448375	-0.056371	-0.810919	0.348101	-0.176767	-1.03502	0.801696	-0.0190349	-0.262528	0.505312	0.0373361	0.708333	0.37535	0.157732	0.972758	P22315
7.27028274536133	7.15204381942749	6.75721549987793	6.96232509613037	7.21500253677368	7.35140991210938	7.2484655380249	6.29975271224976	7.19699478149414	6.14883327484131	7.79729032516479	6.63339853286743	6.47436189651489	7.19035673141479	6.94307851791382									2	2	2	9.2	9.2	9.2	43.004	0	10.379	111420000	5	0.980645	-0.00680912	-0.0252882	0.978107	0.0122393	0.0288411	0.292801	-0.225168	-1.15291	0.483168	-0.218359	-0.747233	NaN	0	NaN	P23242
7.60478734970093	7.75993967056274	7.42571353912354	7.39325904846191	7.5532398223877	7.37861585617065	6.95175409317017	7.28961133956909	8.21130752563477	7.37790679931641	7.77988386154175	7.39809656143188	6.17305850982666	7.38598155975342	7.51293754577637									5	5	5	38.8	38.8	38.8	24.634	0	31.896	653200000	10	0.148368	-0.25262	-1.65811	0.328331	0.243774	1.08279	0.238568	-0.428406	-1.30856	0.624065	-0.175787	-0.516374	0.174396	-0.672181	-1.58244	P23506
7.15189075469971	6.4970178604126	7.61414813995361	7.52184391021729	7.31069469451904	7.01241540908813	6.55178737640381	7.19945335388184	7.46472787857056	7.45498180389404	7.41719913482666	6.98084402084351	6.2207465171814	7.17411804199219	7.75643825531006									2	2	2	3.4	3.4	3.4	73.12	0	10.167	319450000	9	0.580042	-0.177637	-0.584721	0.444023	0.249411	0.83063	0.701601	-0.163188	-0.402017	0.969153	0.014449	0.040311	0.321645	-0.4126	-1.09951	P23780
8.09096336364746	8.30616760253906	8.12694263458252	8.27845668792725	8.15567016601563	8.06307029724121	7.87035131454468	7.87709474563599	8.27777004241943	8.04500961303711	7.41389656066895	7.85759162902832	7.95269060134888	8.12319850921631	7.9988169670105			+	mU1 NR_WT					7	7	7	39.4	39.4	39.4	20.069	0	29.684	2038800000	37	0.0565741	-0.209086	-2.35624	0.256275	-0.288407	-1.28135	0.0301818	-0.217558	-2.82433	0.927766	-0.0084722	-0.0945296	0.766138	0.070849	0.314086	P23927
7.48132801055908	7.64950037002563	7.51669406890869	7.41488981246948	8.00945091247559	7.96248292922974	7.53179836273193	7.54482412338257	8.06587791442871	7.58273363113403	7.81895685195923	7.60699367523193	7.79748201370239	7.59324169158936	7.98069381713867									10	10	10	24.9	24.9	24.9	59.795	0	46.207	883970000	30	0.125801	0.246536	1.77756	0.0654124	0.30692	2.35182	0.069784	0.229	2.2033	0.91558	-0.0175363	-0.110548	0.645148	-0.07792	-0.489588	P24270
7.24029970169067	6.56086921691895	7.33495616912842	6.30760192871094	8.07878303527832	7.78944683074951	7.34529542922974	7.5922212600708	6.3884129524231	7.10139846801758	7.57571744918823	7.47310733795166	7.42213010787964	7.53339052200317	6.50572729110718	+			WT NR_WT					3	3	3	14.7	14.7	14.7	31.172	0	25.052	394560000	13	0.0297074	0.840505	2.83639	0.714437	0.160911	0.38735	0.329075	0.372657	1.06206	0.156473	-0.467848	-1.61947	0.625926	0.211746	0.518969	P24668
6.7374210357666	7.08319759368896	6.57573890686035	7.00082445144653	6.50272703170776	6.91344738006592	7.27304792404175	6.79292392730713	6.40198802947998	6.97176265716553	7.30252313613892	6.631751537323	6.44416570663452	7.13010835647583	7.02349948883057									2	2	2	7.5	7.5	7.5	31.231	0.0062565	3.2632	144930000	6	0.918043	0.0212411	0.107308	0.87577	0.0427958	0.164515	0.840717	-0.0419142	-0.209866	0.790258	-0.0631553	-0.278117	0.783068	-0.08471	-0.29054	P25444
7.87170696258545	8.0052661895752	7.7530312538147	7.63803958892822	6.65144968032837	7.26603174209595	7.53530693054199	7.68144941329956	8.03330326080322	7.58264255523682	7.58432340621948	6.6788182258606	7.296950340271	7.21569061279297	7.7724609375									8	8	8	5	5	5	269.82	0	47.884	1046700000	23	0.0686833	-0.533452	-2.21485	0.615754	-0.0835879	-0.534725	0.0514778	-0.576031	-2.42548	0.898292	-0.0425794	-0.13333	0.153951	-0.492443	-1.67919	P26039;Q71LX4
7.83726024627686	7.57251167297363	7.71633720397949	7.76300859451294	7.4183177947998	7.50107288360596	7.8537712097168	7.90697574615479	8.24395561218262	7.63797998428345	7.51563405990601	7.55503416061401	6.92597436904907	7.70706748962402	7.87120485305786									6	6	6	9	9	9	67.766	0	13.511	953860000	27	0.712392	-0.052245	-0.386598	0.715872	0.0769105	0.385285	0.369815	-0.207459	-0.969331	0.542571	-0.155214	-0.645357	0.399145	-0.28437	-0.921346	P26041;P26043;P26040
9.50878524780273	9.380934715271	9.54354667663574	9.29786968231201	9.47574424743652	9.51012897491455	9.50821971893311	9.60847282409668	9.59592628479004	9.42408084869385	9.32016658782959	9.51280403137207	9.48340225219727	9.4779167175293	9.55991840362549									35	35	35	69.7	69.7	69.7	61.336	0	323.31	48486000000	460	0.195729	0.0928574	1.45568	0.88933	0.0139405	0.146394	0.253566	0.0757263	1.26265	0.6353	-0.0171311	-0.499366	0.423025	0.0617858	0.872143	P26443
7.77147722244263	7.80282163619995	7.81144094467163	8.00389099121094	7.21627140045166	7.44218158721924	7.56110143661499	7.74290561676025	8.15167617797852	7.61626529693604	8.00827503204346	7.64662933349609	7.44954013824463	7.75459289550781	7.68312835693359	+		+	mU1 NR_WT;WT NR_WT					8	8	8	18.2	18.2	18.2	56.678	0	15.632	884130000	19	0.0268011	-0.356793	-2.91512	0.620194	0.0779978	0.52783	0.0436777	-0.213935	-2.54681	0.307935	0.142858	1.11392	0.11755	-0.291933	-1.88874	P27773
6.40167331695557	7.97081613540649	8.04186630249023	6.97340965270996	7.2011251449585	8.00363254547119	8.17140483856201	8.19315242767334	7.13936948776245	8.04245758056641	7.56960725784302	8.14519596099854	6.57524633407593	8.07928943634033	6.69026517868042									2	2	2	3.6	3.6	3.6	98.124	0.0054054	3.7167	1950800000	11	0.282682	0.545387	1.17994	0.667542	0.23687	0.455955	0.966555	0.0255579	0.0437091	0.327633	-0.51983	-1.06551	0.717286	-0.211312	-0.383252	P28271
6.66828203201294	7.30811595916748	6.69663381576538	7.15615510940552	6.8466625213623	6.72560214996338	6.29582786560059	7.4468789100647	6.94773244857788	7.16592645645142	7.6261568069458	6.46663856506348	6.84915208816528	6.94956111907959	7.25556182861328									4	4	4	12.7	12.7	12.7	41.639	0	10.397	209290000	7	0.670347	-0.128554	-0.447309	0.306699	0.289309	1.13799	0.748399	-0.0770683	-0.335875	0.863964	0.0514855	0.178821	0.210364	-0.366377	-1.43646	P28653
8.22963047027588	8.00328826904297	8.13953304290771	7.99125719070435	8.19186973571777	8.38715839385986	8.1458797454834	8.34137535095215	7.78771543502808	8.16250419616699	7.72058916091919	8.3031530380249	8.2846565246582	8.23124027252197	8.13618087768555							+	mU1 NR_mU1	8	8	8	22.9	22.9	22.9	39.809	0	46.037	2139200000	43	0.0742871	0.175644	2.15795	0.192991	-0.200658	-1.50367	0.073687	0.14788	2.16382	0.701318	-0.0277631	-0.402422	0.0367879	0.348538	2.82738	P28654
7.39806175231934	6.7799129486084	7.26394367218018	7.40034818649292	7.0049409866333	7.41099405288696	7.79093933105469	7.58248376846313	7.24796628952026	6.67352724075317	7.00460577011108	7.37604761123657	7.56489086151123	7.56144714355469	6.74999856948853									5	5	4	6	6	5.1	165.3	0	17.036	251740000	10	0.327741	0.236773	1.06525	0.33958	-0.2352	-1.05532	0.687159	0.102529	0.422823	0.617283	-0.134243	-0.526721	0.262113	0.33773	1.26352	P28665
6.7391357421875	7.35707664489746	7.31048107147217	6.73811149597168	7.72855663299561	7.52226161956787	7.33717966079712	7.43197441101074	7.44298124313354	6.69559001922607	7.40169858932495	7.45167922973633	7.57910871505737	7.60810852050781	7.45223140716553	+		+	mU1 NR_WT;WT NR_WT					2	2	2	11	11	11	37.325	0	15.367	442180000	31	0.0497378	0.468792	2.45078	0.637931	0.143889	0.500562	0.0333072	0.486581	2.74965	0.85494	0.0177889	0.190847	0.161558	0.342692	1.64178	P29699
8.85320568084717	9.05157661437988	9.06355857849121	8.74383068084717	8.83285331726074	8.64827251434326	8.70641899108887	8.84277725219727	9.31655693054199	8.86922550201416	8.68874931335449	8.79459285736084	8.73034572601318	8.84234714508057	8.96169662475586									22	22	22	59.5	59.5	59.5	48.354	0	143.44	13909000000	151	0.112025	-0.170462	-1.86128	0.874581	0.0301344	0.166107	0.33843	-0.0957973	-1.03998	0.316927	0.0746651	1.09151	0.483518	-0.125932	-0.756376	P29758
8.48475551605225	8.1573657989502	8.32526969909668	8.12917423248291	8.32372665405273	8.42548561096191	8.72682476043701	8.64481258392334	8.55401611328125	8.31160545349121	8.83666610717773	8.55822849273682	8.54298686981201	8.78192043304443	8.66844177246094			+	mU1 NR_WT					9	9	9	28	28	28	45.722	0	70.691	4451700000	65	0.0860981	0.256071	2.05121	0.126482	0.293288	1.83176	0.0106036	0.363753	3.65809	0.361116	0.107682	0.98842	0.642932	0.0704652	0.492949	P31428
7.26003360748291	7.06279993057251	6.41837882995605	6.46872901916504	6.72650337219238	7.31120252609253	6.49963665008545	7.15057229995728	7.12833309173584	6.67315816879272	7.50736284255981	7.25093221664429	6.64458274841309	6.7358717918396	7.23967599868774									2	2	2	6.2	6.2	6.2	57.317	0.002265	4.3074	107340000	4	0.686849	0.119493	0.423272	NaN	0	NaN	0.557066	0.16528	0.621606	0.859098	0.045787	0.185301	0.647046	-0.135186	-0.486713	P32507
8.09314155578613	8.01849269866943	8.10315322875977	7.89941549301147	7.82760810852051	7.78114461898804	8.16731739044189	8.23854827880859	8.16876220703125	8.20024871826172	7.7223334312439	8.0941915512085	8.04178714752197	8.11001682281494	8.610915184021									4	4	4	41.7	41.7	41.7	12.504	0	10.22	2230500000	29	0.849292	-0.0248961	-0.198389	0.989754	0.00189737	0.0134961	0.236212	0.185677	1.31601	0.278464	0.210573	1.19145	0.408061	0.18378	0.902711	P34884
8.23003959655762	8.23436546325684	8.43552589416504	8.19871234893799	7.70882034301758	8.03766536712646	8.1913948059082	8.12781715393066	8.82443809509277	8.25413703918457	7.69753408432007	8.17084789276123	7.73849534988403	8.06744289398193	8.59986114501953									13	13	13	41	41	41	62.515	0	81.798	3354300000	54	0.0752596	-0.258236	-2.14852	0.956703	-0.0159578	-0.0570664	0.508685	-0.130499	-0.70251	0.560857	0.127737	0.615456	0.752608	-0.114541	-0.33305	P34914
10.2729320526123	10.2604293823242	10.3340511322021	10.1984367370605	10.3910760879517	10.3839406967163	10.4245386123657	10.3642511367798	10.4323596954346	10.2977609634399	9.85597324371338	10.3842096328735	10.3576679229736	10.4923553466797	10.3798313140869	+		+	mU1 NR_WT;WT NR_WT					47	47	47	81	81	81	43.231	0	323.31	349370000000	851	0.00649179	0.124489	4.08141	0.65405	-0.0710977	-0.476144	0.0156063	0.137054	3.34028	0.713916	0.0125644	0.38443	0.223805	0.208151	1.388	P35486;P35487
7.9305362701416	7.88775777816772	8.03059959411621	7.91966915130615	7.24618434906006	7.8765697479248	7.97974395751953	8.10380363464355	8.00086784362793	7.98295831680298	7.82442331314087	7.88308763504028	7.10490894317627	7.93664932250977	7.90477514266968									5	5	5	17.3	17.3	17.3	67.277	0	24.707	1261700000	15	0.494593	-0.140565	-0.727015	0.922789	-0.00605754	-0.101909	0.29242	-0.234785	-1.15391	0.745577	-0.0942202	-0.339814	0.388962	-0.228728	-0.943037	P35564
7.9935507774353	7.9215202331543	7.75473070144653	7.71851825714111	7.80937099456787	7.69309329986572	7.85046863555908	8.07346153259277	7.78091478347778	7.79255962371826	7.77788114547729	7.63073301315308	7.67304849624634	7.67165422439575	7.74917936325073							+	mU1 NR_mU1	6	6	5	38.7	38.7	38.7	22.176	0	15.153	961100000	16	0.929591	0.00951862	0.0921338	0.454069	-0.0632948	-0.811292	0.0563745	-0.165926	-2.35882	0.0799193	-0.175445	-2.10504	0.0176173	-0.102631	-3.48219	P35700
8.02292346954346	8.01661586761475	8.33599948883057	8.03590965270996	8.06900215148926	8.00723552703857	8.36125564575195	8.34812927246094	8.26505374908447	8.25911617279053	8.13984775543213	8.28341388702393	8.14946556091309	8.20655632019043	8.24474716186523									12	12	12	34.1	34.1	34.1	49.714	0	44.663	2587800000	64	0.467835	0.0935435	0.774887	0.28156	0.118477	1.20658	0.203818	0.118184	1.42578	0.807201	0.0246401	0.255052	0.99536	-0.000293493	-0.00611204	P36552
8.87439441680908	8.93012809753418	9.0518856048584	8.98645782470703	8.74341583251953	8.74236392974854	9.06654930114746	9.05153846740723	9.15567016601563	9.12642383575439	9.1226749420166	9.03245735168457	8.80911540985107	8.92501831054688	9.12296867370605		+		mU1_WT					16	16	16	55.4	55.4	55.4	34.238	0	148.09	15396000000	216	0.56796	-0.0597496	-0.604004	0.0126286	0.174206	3.79999	0.885578	0.0116735	0.150135	0.553183	0.0714231	0.62793	0.100166	-0.162533	-2.01375	P38060
10.1973085403442	10.2649593353271	10.2438068389893	10.132643699646	10.0925807952881	10.1218547821045	9.99187278747559	10.0820665359497	10.4443731307983	10.1625347137451	10.012246131897	10.0920181274414	9.89700508117676	10.1160764694214	10.4339456558228	+			WT NR_WT					54	54	54	72.6	72.6	72.6	73.46	0	323.31	257470000000	1002	0.0146327	-0.137586	-3.39237	0.977568	-0.00329494	-0.0295515	0.538665	-0.0749183	-0.651826	0.60427	0.0626676	0.546754	0.689118	-0.0716233	-0.424103	P38647
10.4325847625732	10.3821249008179	10.3900518417358	10.2798948287964	10.4164743423462	10.460883140564	10.4524307250977	10.4744930267334	10.419095993042	10.3541278839111	10.1068363189697	10.4435129165649	10.386962890625	10.4902954101563	10.344765663147									64	64	64	70.1	70.1	70.1	77.951	0	323.31	385300000000	1104	0.060696	0.0799062	2.30485	0.418681	-0.0778107	-0.880929	0.358043	0.0452201	0.99525	0.349646	-0.0346861	-1.01415	0.221272	0.123031	1.39692	P41216;Q8JZR0
9.59125423431396	9.64839935302734	9.50615310668945	9.49946689605713	9.68310070037842	9.58518981933594	9.49207592010498	9.55434417724609	9.93882465362549	9.55471897125244	9.57958889007568	9.61406326293945	9.48056697845459	9.5910758972168	9.69009876251221									25	25	25	81	81	81	32.25	0	323.31	70771000000	263	0.756729	0.0173593	0.324285	0.29953	0.129726	1.15703	0.582414	0.0326328	0.580963	0.80388	0.0152736	0.25956	0.43996	-0.0970929	-0.838544	P42125
9.04948902130127	9.05637073516846	9.20636749267578	8.88794326782227	9.36244487762451	9.1618766784668	9.08493328094482	9.07831192016602	6.95700836181641	8.69461441040039	9.78042507171631	9.22683143615723	8.95320415496826	9.27941608428955	8.69810009002686									3	3	3	80.4	80.4	80.4	10.749	0	98.854	16825000000	76	0.237438	0.121849	1.31213	0.445739	-0.572693	-0.827304	0.945419	-0.0106547	-0.0713747	0.410532	-0.132504	-0.884369	0.462136	0.562039	0.795996	P43023
8.16459083557129	8.17096519470215	7.89575958251953	7.6816029548645	8.16049861907959	8.38059139251709	7.73880434036255	8.03362464904785	6.7238826751709	7.94244480133057	7.42304372787476	7.94272708892822	8.22170066833496	7.83983612060547	7.87466144561768									3	3	3	42.3	42.3	42.3	12.352	0	12.544	1458800000	23	0.594934	0.10015	0.561279	0.118397	-0.615106	-1.88315	0.95556	-0.00849831	-0.0580938	0.52132	-0.108648	-0.680919	0.110058	0.606608	1.94009	P43024
7.41589117050171	7.48963499069214	7.51097393035889	7.72656440734863	7.37415790557861	6.48461437225342	7.17559862136841	6.79989767074585	7.9305362701416	7.37546253204346	7.36619091033936	7.08603954315186	6.72035598754883	7.3123254776001	7.24191999435425	+		+	mU1 NR_WT;WT NR_WT					3	3	3	12.7	12.7	12.7	36.12	0	15.929	394030000	10	0.0326619	-0.577199	-2.76443	0.906429	0.0216304	0.123624	0.0236447	-0.445606	-3.01183	0.600055	0.131593	0.553296	0.0879874	-0.467236	-2.11567	P45377
10.0732049942017	10.1267156600952	10.0276346206665	9.98821544647217	10.1392488479614	10.1939315795898	9.99985218048096	9.9090633392334	10.3416919708252	9.98028087615967	9.80704784393311	10.1378602981567	10.1147441864014	10.1710243225098	10.0992317199707									41	41	41	75.3	75.3	75.3	46.481	0	323.31	203650000000	696	0.929628	0.00658131	0.0920847	0.939215	-0.0109358	-0.0801663	0.0627675	0.0767725	2.28037	0.3338	0.0701911	1.05085	0.53892	0.0877082	0.659186	P45952
7.31268501281738	7.50189399719238	7.41904640197754	7.52548551559448	8.01334285736084	7.52984094619751	7.30129051208496	7.41001749038696	7.56782579421997	7.62782669067383	7.71050691604614	7.87466716766357	7.58690214157104	7.83767032623291	7.26608228683472		+		mU1_WT					3	3	3	16	16	16	20.123	0	9.1204	586510000	15	0.479285	0.123845	0.754177	0.0324131	0.195609	2.93583	0.223476	0.201553	1.35744	0.724896	0.0777075	0.368863	0.973424	0.00594401	0.0350129	P46656
7.59977388381958	7.54379510879517	7.65664434432983	7.72751665115356	7.88521432876587	7.94626569747925	8.11514472961426	7.87320995330811	7.58987140655518	7.7450590133667	7.72926187515259	7.85289478302002	7.75865459442139	7.69304943084717	7.69716835021973	+			WT NR_WT	+	mU1 NR_WT NR			4	4	4	20.2	20.2	20.2	35.268	0.0012887	7.0164	797490000	10	0.00320547	0.323026	4.73574	0.408031	0.0561316	0.902773	0.0713975	0.118509	2.18671	0.0225301	-0.204517	-3.04937	0.349161	0.0623777	1.03252	P47199
9.96247863769531	9.9441967010498	10.1493425369263	9.98253345489502	10.0417079925537	10.0496835708618	10.2105588912964	10.2277584075928	9.86779689788818	10.1369743347168	9.85165596008301	10.1370687484741	10.0807704925537	10.1755409240723	10.0316915512085									38	38	35	63.2	63.2	61.7	56.537	0	323.31	178710000000	632	0.125171	0.122789	1.78118	0.573304	-0.0574954	-0.602202	0.139814	0.0966301	1.70117	0.674676	-0.0261593	-0.440976	0.132948	0.154126	1.79301	P47738;P24549;O35945;Q9JHW9
7.83384799957275	7.73754262924194	7.79394388198853	7.88231372833252	7.97680854797363	7.9047155380249	7.8187141418457	7.92720079421997	8.09120941162109	7.92980194091797	7.05209493637085	7.93217945098877	7.64828205108643	7.90287256240845	8.12037658691406									6	6	6	15.4	15.4	15.4	53.662	0	34.149	1204500000	33	0.0797218	0.0949477	2.10683	0.675928	-0.120877	-0.443513	0.41534	0.0890156	0.874767	0.955724	-0.00593209	-0.0578801	0.506519	0.209892	0.715136	P47791
7.69088697433472	7.62607336044312	7.7735013961792	7.67949151992798	7.40133142471313	7.59676218032837	7.82577657699585	7.63632726669312	8.04253578186035	7.889732837677	7.94082498550415	6.88781785964966	7.67864561080933	7.61488676071167	7.91322040557861		+		mU1_WT					6	6	6	28.1	28.1	28.1	35.623	0	25.394	893010000	18	0.433158	-0.077439	-0.839886	0.00379405	0.26521	5.09252	0.478609	-0.168846	-0.75539	0.714082	-0.0914067	-0.384193	0.161951	-0.434055	-1.6399	P47802
8.18565559387207	8.34545230865479	8.28683757781982	8.03310203552246	8.47927284240723	8.50824642181396	8.26330471038818	8.30124664306641	7.92931652069092	8.11133003234863	8.17629432678223	8.47161483764648	8.36901187896729	8.21122741699219	7.95937061309814									19	19	19	33.3	33.3	33.3	85.268	0	99.303	2775200000	70	0.105996	0.175256	1.90118	0.22634	-0.140448	-1.37918	0.769845	0.0400443	0.306137	0.329741	-0.135211	-1.06047	0.270447	0.180493	1.23867	P47857;P12382;Q9WUA3
9.74112033843994	9.78956699371338	9.81466007232666	9.65614604949951	9.57833003997803	9.69505214691162	9.49600219726563	9.58216571807861	9.72788238525391	9.68385696411133	9.3419885635376	9.71927356719971	9.44983291625977	9.62815380096436	9.82887268066406	+			WT NR_WT					46	46	46	67.6	67.6	67.6	70.839	0	323.31	75713000000	603	0.0233279	-0.162486	-3.0223	0.192395	-0.165797	-1.50608	0.324564	-0.0938401	-1.07289	0.474574	0.0686457	0.762656	0.627574	0.0719573	0.516431	P47934
7.58320999145508	7.6983528137207	7.81813335418701	7.92027473449707	7.05254650115967	7.33120441436768	7.62615537643433	7.53946495056152	7.90020847320557	7.85864543914795	7.6442494392395	7.77935838699341	7.53990364074707	7.6425929069519	7.95607709884644	+			WT NR_WT					6	6	6	25.3	25.3	25.3	30.641	0	16.446	803240000	20	0.0465026	-0.36765	-2.50041	0.690169	0.0460417	0.422565	0.833167	-0.0255097	-0.219998	0.071019	0.34214	2.19057	0.593326	-0.0715514	-0.570012	P48758;Q8K354
7.81470012664795	6.76628017425537	7.21857404708862	6.61388635635376	6.65542411804199	8.03522968292236	7.85498571395874	7.18931770324707	7.32071447372437	6.40961933135986	7.92651700973511	7.82424306869507	7.68673467636108	6.68435096740723	6.42134523391724									2	2	2	27.7	27.7	27.7	9.2908	0.0012392	6.1794	716230000	5	0.457401	0.330379	0.794072	0.822044	0.11559	0.237023	0.912577	0.0508083	0.1145	0.576771	-0.279571	-0.589918	0.911891	-0.0647818	-0.116368	P48771
6.71685314178467	6.53547143936157	7.10068130493164	6.70629167556763	7.57294130325317	7.14201307296753	6.96434497833252	6.42197275161743	7.03778457641602	6.74784374237061	7.37638425827026	7.21805334091187	7.11421060562134	6.83408975601196	7.09523439407349									1	1	1	50	50	50	7.3317	0	11.353	67814000	5	0.36612	0.260494	0.977396	NaN	0	NaN	0.0830321	0.300573	2.07741	0.878797	0.040079	0.159118	0.95201	0.0113928	0.0632603	P48772
11.1177024841309	11.1180000305176	11.1664600372314	11.2059078216553	11.1267156600952	11.3013124465942	11.3128967285156	11.1515226364136	11.0778036117554	11.2048254013062	11.4190301895142	11.2055025100708	11.1746997833252	11.3307180404663	11.1081247329712									70	70	48	96	96	89.6	32.904	0	323.31	2395400000000	4012	0.230352	0.0710943	1.33482	0.390085	0.0818688	0.940623	0.343359	0.0527437	1.02855	0.794891	-0.0183506	-0.271794	0.782405	-0.0291251	-0.291458	P48962
6.5557804107666	6.99982929229736	7.30000829696655	7.41209077835083	7.3477201461792	7.42579507827759	7.38829660415649	7.32697057723999	7.0211615562439	7.38667726516724	7.44171190261841	6.79732370376587	7.43562126159668	7.31287527084351	6.83216667175293									3	3	3	6.4	6.4	6.4	76.755	0	8.9862	245570000	4	0.164013	0.305268	1.58521	0.429779	0.216256	0.858621	0.916361	0.0275695	0.10952	0.143492	-0.277699	-1.68235	0.435806	-0.188687	-0.846693	P49222
8.94443798065186	8.97893333435059	9.1345911026001	8.85047435760498	9.14696502685547	9.05637073516846	9.15112495422363	9.16817283630371	8.83868503570557	9.07820320129395	8.96642780303955	9.14444923400879	9.14925003051758	9.02407455444336	8.86957168579102									23	23	23	67.6	67.6	67.6	50.37	0	212.31	17597000000	163	0.0540032	0.153549	2.39031	0.86698	-0.0160038	-0.176296	0.460475	0.0697272	0.788388	0.279099	-0.083822	-1.18971	0.417354	0.085731	0.883627	P50136
9.11780166625977	9.21518802642822	9.27524185180664	9.16595649719238	9.40507316589355	9.38674831390381	9.37597465515137	9.33652019500732	9.30807304382324	9.29214572906494	9.19468116760254	9.36441993713379	9.26237964630127	9.32372665405273	9.35168075561523	+		+	mU1 NR_WT;WT NR_WT					14	14	14	72.6	72.6	72.6	26.588	0	197.94	29409000000	227	0.00251682	0.182532	4.97398	0.210267	0.0714196	1.43682	0.0175235	0.132005	3.2474	0.109794	-0.0505273	-1.87579	0.190431	0.0605851	1.51407	P50171
7.7189998626709	7.51190996170044	7.50793695449829	7.38535594940186	7.90690565109253	7.67565011978149	7.66985607147217	6.9474081993103	7.37476682662964	7.28418254852295	7.53093099594116	7.68576860427856	7.83095407485962	7.68438768386841	7.55033826828003							+	mU1 NR_mU1	3	3	3	27.3	27.3	27.3	20.895	0	14.604	572550000	10	0.934166	0.0189043	0.0861289	0.243392	-0.134424	-1.32208	0.131519	0.156811	1.74543	0.54682	0.137907	0.638354	0.0237337	0.291235	3.20981	P50462
7.6474027633667	7.63670873641968	7.68719005584717	6.8838939666748	7.71357440948486	7.02488327026367	7.6264328956604	7.63411426544189	7.72989320755005	7.69590187072754	7.82168054580688	7.63834953308105	7.66488647460938	6.6799111366272	7.54372024536133									4	4	4	12.2	12.2	12.2	68.325	0	35.523	639150000	18	0.890729	0.0359523	0.143321	0.271995	0.28536	1.23413	0.796703	-0.082082	-0.269324	0.692485	-0.118034	-0.415127	0.246825	-0.367442	-1.31104	P50516
10.2520027160645	10.2018070220947	10.2212581634521	10.0993356704712	10.376503944397	10.401762008667	10.2153463363647	10.2423677444458	10.3941011428833	10.1794939041138	10.0134267807007	10.2567176818848	10.2276296615601	10.2057456970215	10.2193222045898									65	65	65	83.1	83.1	83.1	70.875	0	323.31	300260000000	1115	0.0909957	0.115394	2.01126	0.984287	0.00207305	0.0206987	0.369398	0.0337529	0.970238	0.140575	-0.0816412	-1.69724	0.747395	0.0316799	0.340394	P50544
7.03730010986328	6.7104663848877	7.54202842712402	6.89938163757324	7.62516832351685	7.56506824493408	7.57764101028442	6.848219871521	7.99689245223999	7.20622158050537	8.00522899627686	7.62150859832764	6.97344207763672	6.98062419891357	6.73798751831055									2	2	2	23.1	23.1	23.1	18.841	0	11.192	698800000	14	0.214847	0.35673	1.38674	0.0740247	0.68882	2.25271	0.908726	0.0310965	0.119571	0.265816	-0.325634	-1.2269	0.0914334	-0.657724	-2.08539	P50637
10.4167070388794	10.3997945785522	10.2532167434692	10.2724685668945	10.3444709777832	10.342324256897	10.1142435073853	10.0989208221436	10.6289911270142	10.2388486862183	9.89085102081299	10.4236879348755	10.2376194000244	10.3359994888306	10.4068803787231									50	50	50	74.7	74.7	74.7	47.907	0	323.31	368190000000	1088	0.21851	-0.110557	-1.37417	0.674167	-0.0826498	-0.44612	0.804247	0.0155001	0.259061	0.168231	0.126057	1.56668	0.618941	0.0981499	0.529772	P51174
8.03261852264404	8.02698230743408	8.02333450317383	8.04068183898926	7.96597290039063	7.81294679641724	8.1415433883667	8.19592761993408	8.06673622131348	8.13036632537842	8.75898742675781	8.14832496643066	8.02060985565186	8.04851913452148	8.08195877075195									10	10	10	34.6	34.6	34.6	50.87	0	70.391	1984100000	45	0.984152	-0.00180662	-0.0207059	0.180286	0.287792	1.55664	0.16463	0.0439489	1.58247	0.634509	0.0457555	0.50056	0.250521	-0.243843	-1.29931	P51175
7.20120573043823	7.39853048324585	6.76434183120728	7.3213791847229	7.48692607879639	7.80132150650024	7.6375298500061	7.32392978668213	7.1177020072937	6.41830587387085	7.8410005569458	7.49103927612305	7.79008817672729	7.75725936889648	7.53386116027832			+	mU1 NR_WT					2	2	2	11.9	11.9	11.9	17.358	0.0044199	3.9405	454310000	9	0.0664071	0.391062	2.23934	0.909514	-0.0456948	-0.119524	0.0261826	0.471698	2.93306	0.550341	0.0806352	0.632578	0.20507	0.517393	1.45636	P51637;P49817
7.86201810836792	7.85051155090332	7.88985061645508	7.98327445983887	8.27616310119629	7.9780707359314	7.91136026382446	7.96303176879883	7.01445341110229	7.06982183456421	8.31993865966797	6.38744831085205	8.00423526763916	8.10102462768555	7.22027635574341									7	7	7	54.8	54.8	54.8	18.864	0	18.72	1112000000	10	0.17346	0.135743	1.54432	0.285603	-0.428342	-1.19519	0.286414	-0.468168	-1.16988	0.188862	-0.60391	-1.48196	0.948947	-0.0398252	-0.0673061	P51667;Q62082
9.9529275894165	9.86324596405029	9.8711404800415	9.82276248931885	9.93690586090088	10.095552444458	9.92438793182373	9.85145378112793	10.1282052993774	9.79383182525635	9.77666473388672	9.95108032226563	9.85488891601563	9.97499465942383	10.0119934082031									52	30	30	91.6	69.5	69.5	32.931	0	272.27	136850000000	476	0.247411	0.0745559	1.2812	0.835875	0.0220482	0.218233	0.153021	0.0707202	1.63569	0.952202	-0.00383568	-0.0624908	0.658382	0.048672	0.469638	P51881
8.19368076324463	8.1699390411377	8.2586612701416	8.03450775146484	8.12991523742676	8.2172737121582	8.2636833190918	8.25360488891602	8.38724708557129	8.01199340820313	7.53685569763184	8.10012912750244	8.29272079467773	8.16357898712158	8.16334056854248									9	9	9	37	37	37	33.466	0	26.258	2358200000	42	0.390273	0.0519221	0.925791	0.424214	-0.185498	-0.869752	0.808313	0.0157452	0.253544	0.501548	-0.0361769	-0.714864	0.384733	0.201244	0.952179	P52196
8.57552242279053	8.67727851867676	8.58017158508301	8.61742973327637	8.35144805908203	8.37685012817383	8.48418617248535	8.6180477142334	8.84478187561035	8.50459289550781	8.44563579559326	8.51720905303955	8.43338584899902	8.52276992797852	8.69030284881592									15	15	15	38.4	38.4	38.4	57.844	0	52.974	5772500000	74	0.0547621	-0.154968	-2.38008	0.899827	-0.0142637	-0.132405	0.268106	-0.0716836	-1.22037	0.344296	0.0832839	1.02639	0.657745	-0.0574199	-0.470592	P52480
9.16905689239502	9.16205596923828	8.96242618560791	8.88477230072021	9.19075202941895	9.25887680053711	8.83233642578125	8.94634914398193	8.47035121917725	8.9434700012207	8.72805309295654	9.18999576568604	9.07914543151855	9.18452072143555	8.73478412628174									7	7	7	65.5	65.5	65.5	13.02	0	238.06	16268000000	165	0.922656	0.0125008	0.101244	0.0678994	-0.33062	-2.32182	0.984958	0.00253367	0.0196526	0.948138	-0.00996709	-0.0678131	0.108615	0.333153	1.95039	P52503
9.80545330047607	9.86694240570068	9.82661914825439	9.88132762908936	9.58311939239502	9.67607116699219	9.57059001922607	9.63960647583008	10.0173673629761	9.74814128875732	9.60018825531006	9.78495979309082	9.64296913146973	9.72542190551758	9.89638328552246	+			WT NR_WT	+	mU1 NR_WT NR			56	56	56	78	78	78	73.98	0	323.31	92743000000	662	0.000286269	-0.227739	-7.52036	0.611023	-0.05652	-0.542104	0.191242	-0.0826521	-1.47275	0.0484367	0.145087	2.47032	0.836305	-0.0261321	-0.21765	P52825
8.88204574584961	8.89505195617676	8.97218418121338	8.9232702255249	8.74681282043457	8.6882152557373	8.80916881561279	8.88670539855957	8.35667610168457	9.00371932983398	8.74594116210938	8.79551124572754	8.65791606903076	8.65020084381104	8.57908630371094	+		+	mU1 NR_WT;WT NR_WT					24	24	24	53.1	53.1	53.1	53.246	0	156.05	11104000000	211	0.0280326	-0.135412	-2.88069	0.232617	-0.216026	-1.35771	0.00244076	-0.247459	-5.00476	0.121263	-0.112047	-1.80409	0.857429	-0.0314336	-0.189129	P53395
7.71430444717407	6.72351360321045	7.62749910354614	7.57319641113281	7.92809867858887	7.83454132080078	7.6935772895813	7.91893672943115	7.9232439994812	6.97629022598267	7.68707084655762	8.01245784759521	7.74336862564087	7.97584533691406	7.87404680252075									9	9	9	44.1	44.1	44.1	30.977	0	46.658	915550000	24	0.1165	0.43416	1.83302	0.755259	0.11924	0.329323	0.0846041	0.491801	2.06385	0.504119	0.0576411	0.7104	0.194162	0.372561	1.49896	P53702
7.71825265884399	7.64831113815308	7.6912670135498	7.81197690963745	7.89835214614868	7.75890445709229	7.644615650177	7.66575002670288	7.46562051773071	7.8098087310791	7.40834474563599	7.71845197677612	7.62981700897217	7.81372785568237	7.63098669052124									3	3	3	6.5	6.5	6.5	53.267	0	15.964	748190000	30	0.728989	0.0244536	0.363087	0.224107	-0.156194	-1.38695	0.742405	-0.019206	-0.344246	0.5688	-0.0436597	-0.602656	0.294282	0.136988	1.17122	P53986
8.12917423248291	7.95674467086792	8.1490650177002	8.05732345581055	7.98794317245483	8.14213943481445	8.17929363250732	8.1802978515625	8.27174854278564	8.08919811248779	8.32576179504395	8.06870555877686	8.10380363464355	8.19100379943848	8.16512584686279									9	9	4	49.5	49.5	24.1	23.547	0	30.27	2099200000	46	0.463882	0.0493417	0.78212	0.105447	0.155826	1.97353	0.296715	0.0590829	1.14267	0.861696	0.00974119	0.18184	0.216455	-0.0967431	-1.41415	P53994
11.104998588562	11.0652809143066	11.0702600479126	10.9790697097778	11.1290130615234	11.2419195175171	11.0975351333618	11.0701856613159	10.9569988250732	11.0127954483032	10.8178825378418	11.1507253646851	11.1064624786377	11.1538152694702	11.0198221206665							+	mU1 NR_mU1	71	71	69	89.4	89.4	89.4	50.906	0	323.31	1821800000000	1866	0.135411	0.079761	1.72434	0.0821664	-0.125677	-2.16977	0.246605	0.052804	1.28366	0.601847	-0.026957	-0.550511	0.0327183	0.178481	2.92774	P54071
7.76163482666016	7.78899526596069	7.87911891937256	7.92448091506958	7.73073387145996	7.67316818237305	8.05303955078125	7.803053855896	7.64197969436646	7.8248348236084	8.15718460083008	7.84223461151123	7.66329574584961	7.77347183227539	7.75404214859009									4	4	4	19.4	19.4	19.4	31.375	0	38.687	955310000	21	0.806315	-0.0235586	-0.256253	0.798295	0.0361089	0.269526	0.180614	-0.0802964	-1.51474	0.557764	-0.0567378	-0.620472	0.423121	-0.116405	-0.87195	P54116
7.66569375991821	6.91402721405029	6.68267488479614	6.90642404556274	7.49402952194214	6.69786691665649	6.54174709320068	7.76583242416382	6.85735130310059	6.69928550720215	7.90477323532104	6.65460681915283	7.55204725265503	7.0577278137207	7.6540994644165									2	2	2	7.8	7.8	7.8	57.205	0	11.57	308940000	4	0.82958	0.082664	0.224821	0.794298	0.111598	0.275027	0.574615	0.187415	0.593353	0.79094	0.104751	0.277185	0.863423	0.075817	0.181071	P55772
9.06269454956055	8.86214923858643	9.04665088653564	8.8564453125	9.34797382354736	9.4310417175293	9.19515228271484	9.07714939117432	9.3291540145874	8.7952823638916	8.52306938171387	9.13700580596924	9.00290012359619	9.14952659606934	9.1937084197998	+			WT NR_WT					7	7	7	53.4	53.4	53.4	10.344	0	25.565	23778000000	106	0.0197424	0.305844	3.15288	0.736171	-0.0744831	-0.356281	0.057561	0.1638	2.34359	0.161329	-0.142044	-1.59723	0.295381	0.238283	1.16823	P56135
6.67897605895996	6.83834028244019	7.1018500328064	6.52835750579834	6.7894721031189	7.48085021972656	6.38855457305908	6.81873035430908	8.2741813659668	7.17989635467529	7.23878145217896	6.89054822921753	6.58353662490845	7.30304670333862	7.10102510452271									3	3	3	27.3	27.3	27.3	22.876	0	32.548	342660000	4	0.75929	0.0825208	0.320732	0.0655571	0.777405	2.35004	0.388822	0.182658	0.928819	0.726853	0.100137	0.366099	0.14867	-0.594747	-1.70627	P56213
6.83983135223389	6.82952404022217	6.44397640228271	7.21366024017334	9.1765832901001	9.09314155578613	6.18546295166016	6.36190986633301	7.04910850524902	7.16914939880371	7.62608528137207	6.79389142990112	8.94758605957031	7.0565128326416	6.98115730285645									2	2	2	13.8	13.8	13.8	6.6979	0	8.609	30102000000	71	0.339875	0.872526	1.03661	NaN	0	NaN	0.289631	0.613039	1.16129	0.797704	-0.259488	-0.26796	0.800894	0.163339	0.265953	P56379
8.48692607879639	8.78317451477051	8.38422775268555	8.81304740905762	8.78801250457764	9.02036094665527	8.42831325531006	8.22344398498535	8.87748622894287	8.42447280883789	8.6929874420166	8.77836132049561	8.69703769683838	8.73598957061768	8.33352756500244									7	7	7	78.8	78.8	78.8	5.8378	0	19.442	7196800000	34	0.993337	-0.00181127	-0.00870464	0.785539	0.0481382	0.287121	0.900031	0.0193851	0.131035	0.921297	0.0211964	0.10303	0.867342	-0.0287531	-0.175809	P56382
7.97022151947021	8.44974040985107	7.86459398269653	8.76272392272949	8.54701137542725	8.31340312957764	8.75308513641357	7.94841766357422	7.99136781692505	8.47562789916992	9.9286003112793	8.704665184021	8.45662403106689	8.69769096374512	8.14952659606934									2	2	2	27.9	27.9	27.9	14.2	0	104.01	4917800000	307	0.652665	0.128659	0.473393	0.371321	0.536712	0.981724	0.368964	0.240307	0.971183	0.624677	0.111647	0.515444	0.587063	-0.296405	-0.580008	Q9CR84;P56384;P56383
9.1860237121582	9.01515007019043	8.99329471588135	8.75535678863525	8.93534088134766	9.06005573272705	9.10605525970459	9.02358150482178	8.18212890625	8.95848751068115	7.41758441925049	8.98501300811768	8.90036678314209	9.03136825561523	8.8019380569458									9	9	9	72.1	72.1	72.1	10.071	0	111.34	13495000000	127	0.663106	0.043802	0.457949	0.0929168	-0.801389	-2.07273	0.591343	-0.0577848	-0.5669	0.152932	-0.101587	-1.63611	0.105546	0.743605	1.97279	P56391
8.52850532531738	8.42388439178467	8.48852252960205	8.2837085723877	9.13209915161133	9.13564109802246	8.68735027313232	8.64544200897217	6.64865016937256	8.22486972808838	7.63423728942871	8.83042812347412	8.77692604064941	8.85126399993896	8.05755233764648	+			WT NR_WT					3	3	3	31.2	31.2	31.2	8.9863	0	18.496	7146000000	39	0.0180545	0.468978	3.22363	0.0630252	-0.928569	-2.38179	0.357365	0.197887	0.996763	0.290931	-0.271091	-1.15784	0.0528855	1.12646	2.52447	P56392
7.03981065750122	6.94009780883789	7.14085340499878	7.06591558456421	7.41435480117798	7.51805305480957	6.90679836273193	7.03282022476196	7.04198455810547	6.94554758071899	7.28550624847412	7.3931188583374	7.52838945388794	7.42152166366577	7.28809261322021			+	mU1 NR_WT			+	mU1 NR_mU1	3	3	3	84.1	84.1	84.1	6.784	0	10.995	250330000	21	0.30517	0.171337	1.12092	0.669352	0.0443434	0.453263	0.00138248	0.361111	5.59873	0.26723	0.189774	1.22286	0.0274714	0.316768	3.07994	P56394
11.5171031951904	11.4510488510132	11.3595323562622	11.3592662811279	11.2784337997437	11.287712097168	11.4513874053955	11.4605073928833	11.3631982803345	11.331184387207	11.6103086471558	11.3300275802612	11.3088207244873	11.396635055542	11.4607629776001									65	65	65	87.5	87.5	87.5	56.3	0	323.31	4139300000000	4602	0.439138	-0.0522275	-0.828416	0.88526	0.0131594	0.151826	0.391135	-0.0476761	-0.923995	0.942652	0.00455141	0.0750004	0.502751	-0.0608355	-0.7218	P56480
8.38856315612793	8.27133083343506	8.15280818939209	8.16241550445557	8.49965953826904	8.50290489196777	7.95895051956177	8.2892541885376	7.99601650238037	8.05296325683594	8.09777736663818	8.38932514190674	8.40365219116211	8.20161533355713	8.13497352600098		+		mU1_WT			+	mU1 NR_mU1	10	10	10	35.7	35.7	35.7	33.91	0	52.654	3417600000	67	0.638808	0.0689129	0.49409	0.0384575	-0.19486	-2.78972	0.67304	0.0386121	0.443366	0.841049	-0.0303007	-0.209421	0.0379969	0.233473	2.79993	P56501;P70406
7.21021127700806	7.00281381607056	7.27547264099121	6.59808921813965	6.50348091125488	7.30051803588867	6.97562837600708	7.26344680786133	6.65966510772705	6.74762916564941	8.0320930480957	6.74382495880127	7.23894882202148	6.90461206436157	6.8417067527771									3	3	2	4	4	2.5	103.07	0	8.321	134140000	5	0.96519	-0.0108782	-0.0454935	0.774513	0.124816	0.302414	0.649091	-0.0893736	-0.478709	0.725251	-0.0784954	-0.368361	0.608515	-0.214189	-0.54603	Q7TPR4;P57780
6.96806907653809	7.02073431015015	6.96046590805054	7.12609910964966	6.52006483078003	7.67333745956421	6.99056529998779	6.73273849487305	6.62969970703125	6.46306180953979	7.60175800323486	6.87146806716919	6.83327960968018	6.80503940582275	6.42858505249023			+	mU1 NR_WT					2	2	2	16.8	16.8	16.8	14.308	0.0023229	4.9468	107820000	6	0.880782	-0.0396656	-0.156487	0.704582	-0.120669	-0.401581	0.0412285	-0.284249	-2.5897	NaN	0	NaN	NaN	0	NaN	P58064
7.4057731628418	6.9404935836792	6.7296199798584	7.52253532409668	6.70644950866699	7.01317977905273	6.80190849304199	6.84134674072266	7.87535047531128	7.58040046691895	7.15606355667114	6.63760042190552	6.95955562591553	6.7567286491394	7.53179836273193									6	6	6	11.2	11.2	11.2	95.313	0	12.543	433690000	5	0.171175	-0.308884	-1.55402	0.228994	0.387666	1.37003	0.538618	-0.178185	-0.651905	0.553584	0.1307	0.627276	0.110813	-0.565851	-1.93476	P58252
8.67971897125244	8.68640422821045	8.89588642120361	8.82442569732666	8.62233829498291	8.66075134277344	8.89329051971436	8.91575336456299	9.16970348358154	8.88731861114502	8.78656673431396	8.93567371368408	8.77049827575684	8.98486042022705	8.9071798324585									36	36	36	42.4	42.4	42.4	111.34	0	233.37	11237000000	188	0.988292	0.00142455	0.0152959	0.185089	0.176254	1.5362	0.118444	0.127944	1.82107	0.205791	0.12652	1.41866	0.679543	-0.0483099	-0.438176	P58281;P58682
8.0652437210083	7.84409189224243	7.92881059646606	7.95944213867188	8.40978145599365	8.36295318603516	7.92565250396729	8.00744915008545	7.19256639480591	7.81887865066528	7.27493476867676	8.2449197769165	8.15164566040039	8.37997627258301	7.56856536865234		+		mU1_WT					6	6	6	92.4	92.4	92.4	8.1828	0	39.419	1670900000	26	0.13358	0.227062	1.73418	0.029809	-0.520604	-3.00844	0.486307	0.13688	0.741644	0.691999	-0.0901823	-0.415828	0.0576643	0.657483	2.45383	P60603
8.7783317565918	8.52903270721436	8.48384380340576	8.23671340942383	8.64603137969971	8.73087120056152	8.62066650390625	8.80112934112549	8.34372329711914	8.35026741027832	8.48726558685303	8.53253746032715	8.65346336364746	8.54282569885254	8.35162258148193									23	9	9	68.8	33.9	33.9	41.792	0	73.438	6244300000	60	0.154615	0.192694	1.62816	0.446108	-0.113228	-0.82659	0.921215	0.0131319	0.103137	0.053367	-0.179562	-2.39901	0.191295	0.12636	1.51054	P63260;P60710;Q8BFZ3
7.88964891433716	7.61810064315796	7.87480068206787	7.74361181259155	7.71330547332764	7.85785675048828	8.16628170013428	8.1372594833374	8.00449371337891	7.74634599685669	8.52435684204102	7.78303146362305	8.10308456420898	8.08760356903076	8.05122947692871									7	6	6	52.9	47.1	47.1	21.258	0	22.737	1256200000	24	0.190999	0.187135	1.47369	0.191887	0.310192	1.50814	0.062659	0.224697	2.28164	0.787376	0.0375614	0.282058	0.702204	-0.0854949	-0.405029	P60766;Q8R527;Q9ER71
8.33969020843506	8.38594532012939	8.31067180633545	8.37147426605225	7.90033960342407	8.25119972229004	8.20180702209473	8.17655467987061	8.37401485443115	8.24338531494141	8.07470703125	8.08568286895752	8.0590705871582	8.18338394165039	8.47043991088867	+			WT NR_WT					6	6	5	31.5	31.5	26	22.541	0	20.201	2767700000	37	0.0346409	-0.21947	-2.72004	0.167652	-0.121243	-1.61305	0.162344	-0.152301	-1.59266	0.604239	0.0671691	0.546802	0.82448	-0.0310581	-0.233707	P61027;Q9DD03;Q9D1G1;P62821;P55258;Q8K386
8.5593204498291	8.57345199584961	9.07671356201172	8.90103816986084	8.25988006591797	7.93103551864624	8.9957799911499	8.96713638305664	8.44593048095703	9.13382625579834	9.03027534484863	8.671950340271	8.7779483795166	8.62726306915283	8.8742733001709									23	23	23	59.4	59.4	59.4	56.451	0	215.51	9417200000	170	0.446219	-0.239173	-0.814979	0.709227	0.0923796	0.394861	0.783933	-0.0397723	-0.286771	0.488418	0.199401	0.737903	0.519316	-0.132152	-0.692754	P61922
6.7817497253418	7.3713264465332	7.36135005950928	7.00449132919312	6.4937629699707	6.31005668640137	6.89862108230591	7.20795726776123	8.37101268768311	7.43378591537476	7.92045116424561	6.74940919876099	7.17740297317505	7.24726104736328	7.30293655395508		+		mU1_WT			+	mU1 NR_mU1	3	3	3	41.1	41.1	41.1	10.458	0	20.194	560820000	12	0.155982	-0.40213	-1.62176	0.0404019	0.778687	2.74809	0.958099	-0.0104769	-0.0547712	0.150841	0.391653	1.64611	0.0333393	-0.789164	-2.91156	P62075
8.97236442565918	8.9654369354248	9.02783870697021	8.98341846466064	9.2064208984375	9.21524047851563	9.05990409851074	9.08353805541992	8.70882892608643	8.96305084228516	8.95128440856934	8.9674072265625	9.06688499450684	9.02366352081299	9.03261852264404	+			WT NR_WT	+	mU1 NR_WT NR			16	16	10	43.4	43.4	30.9	50.454	0	120.9	15590000000	132	0.0114412	0.154011	3.59455	0.174116	-0.112877	-1.58369	0.205934	0.0353789	1.41815	0.0400832	-0.118632	-2.61069	0.0997073	0.148256	2.01735	P62631
7.08411121368408	6.94050931930542	7.01240539550781	7.25071287155151	6.36890077590942	6.70350646972656	7.13697385787964	7.037109375	7.1380181312561	6.9111909866333	7.59682893753052	6.5813364982605	6.83369541168213	6.84822607040405	7.64888668060303									4	4	4	11.8	11.8	11.8	29.597	0	9.1519	154790000	9	0.212213	-0.260312	-1.39589	0.475815	0.143411	0.770498	0.710477	-0.0938985	-0.389327	0.586978	0.166414	0.573759	0.494328	-0.23731	-0.736823	P62702
8.30427551269531	8.03342342376709	8.10363292694092	7.7367787361145	7.28804779052734	7.29589700698853	8.20024871826172	8.14016246795654	8.34008693695068	7.76478862762451	8.4103889465332	7.94100427627563	8.03019523620605	7.97534894943237	8.14457416534424									3	3	3	13.6	13.6	13.6	20.825	0	35.369	1734800000	30	0.30532	-0.313439	-1.12054	0.588927	0.127227	0.577026	0.86834	-0.021747	-0.173	0.300887	0.291692	1.13187	0.443257	-0.148974	-0.832119	Q99JI6;P62835
8.07842063903809	7.97303104400635	8.07419490814209	7.74059963226318	8.26876544952393	8.25606822967529	8.10984802246094	8.13836574554443	7.71332263946533	7.91331577301025	7.27597236633301	7.86953687667847	8.23709106445313	8.1337308883667	7.87431955337524	+			WT NR_WT					12	6	6	40	18.8	18.8	37.377	0	49.491	1658800000	44	0.0434685	0.2267	2.55038	0.129382	-0.332358	-1.81413	0.629071	0.062108	0.508777	0.155473	-0.164592	-1.62413	0.0951505	0.394466	2.05405	P62874
8.63342761993408	8.556471824646	8.59848403930664	8.41487312316895	8.62093734741211	8.6315860748291	8.76475143432617	8.7750129699707	8.3271951675415	8.44229125976563	7.21340274810791	8.60079860687256	8.68826007843018	8.66066646575928	8.53687381744385									13	13	7	51.8	51.8	30.6	37.331	0	97.973	5719500000	95	0.0594478	0.147258	2.32001	0.155268	-0.556518	-1.67259	0.272121	0.0708356	1.20905	0.202913	-0.0764222	-1.42907	0.115926	0.627353	1.89958	P62880;P29387
9.74765300750732	9.88233089447021	9.7113094329834	9.77061653137207	9.73468780517578	9.79872703552246	9.73897075653076	9.6886510848999	9.71748733520508	9.75649166107178	9.23704051971436	9.82204341888428	9.82188701629639	9.89434337615967	9.76269340515137									22	22	14	78.1	78.1	55.2	11.605	0	323.31	95807000000	353	0.416446	-0.0377183	-0.872569	0.215302	-0.207638	-1.41833	0.340501	0.0472643	1.03516	0.0520082	0.0849826	2.41795	0.135482	0.254902	1.77835	P62897
8.22450733184814	8.31037425994873	8.27116775512695	8.40602874755859	8.19634246826172	8.11925601959229	8.33493614196777	8.25510311126709	8.14391994476318	8.23126602172852	8.41732215881348	8.24642467498779	8.24699115753174	8.45897006988525	8.35799217224121									7	7	6	45.3	45.3	39.6	21.45	0	31.469	2698900000	62	0.247042	-0.0766101	-1.28232	0.653433	-0.0388501	-0.477073	0.714121	0.024575	0.384138	0.189929	0.101185	1.47782	0.514859	0.0634251	0.700505	P63001;P60764;Q05144
8.81634712219238	8.7686824798584	8.71380138397217	8.61281585693359	8.87518310546875	8.86815071105957	8.77180767059326	8.89920234680176	8.57622623443604	8.61207389831543	8.54236507415771	8.83663463592529	8.86170768737793	8.77420330047607	8.70730590820313		+		mU1_WT			+	mU1 NR_mU1	22	21	21	37.5	35.8	35.8	70.87	0	123.87	9244100000	160	0.0518995	0.125674	2.41949	0.0390629	-0.151023	-2.77651	0.274035	0.0670512	1.2037	0.235698	-0.0586231	-1.31764	0.00434024	0.218074	4.93515	P63017;P17156;Q61696;P16627;P17879
9.53181076049805	9.60742282867432	9.40561962127686	9.44510555267334	9.4657096862793	9.47535133361816	9.43784523010254	9.25674152374268	9.35380077362061	9.37285709381104	9.95652389526367	9.39139366149902	9.4263973236084	9.15712451934814	9.40706825256348									10	10	10	86.2	86.2	86.2	12.454	0	137.82	35128000000	210	0.242685	-0.0885777	-1.29571	0.729652	0.0635709	0.365556	0.0980813	-0.151994	-1.95715	0.465677	-0.063416	-0.77883	0.288549	-0.215565	-1.18698	P63030
9.95724773406982	10.0204029083252	10.0370283126831	9.9140043258667	9.79176044464111	9.78356075286865	9.99696636199951	9.99852085113525	10.4335136413574	9.95219135284424	9.58622741699219	9.97161483764648	9.90318775177002	10.033745765686	10.2462768554688									50	50	50	76.4	76.4	76.4	60.955	0	323.31	177530000000	666	0.230341	-0.0894687	-1.33485	0.969085	0.00847332	0.0407333	0.503348	0.0565355	0.711736	0.178357	0.146004	1.52395	0.83804	0.0480622	0.2153	P63038
7.47096872329712	7.15515375137329	7.31099033355713	7.28164672851563	7.17684316635132	7.13896560668945	7.38232326507568	7.52553701400757	7.4035496711731	6.6104907989502	7.82824230194092	6.55460929870605	7.31251573562622	6.52791738510132	7.42980051040649									3	3	1	12.2	12.2	4.9	27.771	0	8.6476	310120000	17	0.991574	0.00122738	0.011008	0.941142	-0.023929	-0.0776182	0.211856	-0.348479	-1.39714	0.222999	-0.349707	-1.35903	0.467266	-0.32455	-0.78637	P63101
6.85666036605835	6.63967990875244	7.37182474136353	6.78119039535522	7.19822978973389	7.42576217651367	7.44923162460327	7.52227449417114	7.33683967590332	7.38628482818604	7.41102170944214	7.15695667266846	7.54890489578247	6.69855833053589	6.98142004013062	+			WT NR_WT					1	1	1	7.8	7.8	7.8	16.793	0.0012658	6.5227	284590000	11	0.0315124	0.486536	2.79156	0.0576309	0.46571	2.4543	0.470385	0.184121	0.770244	0.164804	-0.302415	-1.5817	0.240193	-0.281589	-1.3325	Q8BGY2;P63242
9.04410839080811	9.00445079803467	8.8836727142334	9.00108432769775	8.79281902313232	8.74921798706055	8.92761707305908	8.93962860107422	9.6993350982666	8.83605861663818	9.38239574432373	8.78962326049805	8.81711578369141	8.99018383026123	9.1576681137085									19	19	19	83.8	83.8	83.8	29.82	0	269.43	19937000000	142	0.0683466	-0.131008	-2.21842	0.193583	0.322601	1.50129	0.645104	-0.0446813	-0.484658	0.411924	0.0863271	0.881581	0.177177	-0.367282	-1.57015	P67778
9.36078262329102	9.35818195343018	9.21378326416016	9.28318786621094	9.6576681137085	9.59321975708008	9.38808345794678	9.42605590820313	9.24900245666504	9.24568557739258	9.34613800048828	9.36125564575195	9.55875682830811	9.39130592346191	9.31369876861572	+			WT NR_WT					27	27	13	78	78	52.5	42.019	0	309.69	38757000000	341	0.0280793	0.212273	2.87941	0.653999	-0.0237086	-0.476222	0.15991	0.10227	1.60366	0.237972	-0.110003	-1.31044	0.126634	0.125979	1.83082	P68033;P62737;P68134;P63268
8.06292057037354	8.12775230407715	8.44841289520264	8.79450225830078	7.40762901306152	7.62567234039307	8.5477991104126	8.44160079956055	8.51989364624023	8.57829570770264	9.25935459136963	7.71955490112305	8.27081871032715	7.71384334564209	8.69692420959473									8	3	1	32.6	13.4	7.4	49.924	0	20.975	3662800000	40	0.329279	-0.352722	-1.06157	0.188699	0.427451	1.52117	0.409659	-0.258112	-0.886121	0.808001	0.09461	0.253966	0.103261	-0.685563	-1.98991	P68368
8.0421028137207	8.10332489013672	8.2546443939209	8.25755882263184	7.90646982192993	7.92360687255859	8.21616554260254	8.41361808776855	8.26188087463379	8.17283630371094	9.02946472167969	7.89300680160522	8.02489566802979	8.23494720458984	8.30826568603516									11	11	1	33.9	33.9	3.1	50.135	0	44.154	2807700000	58	0.72455	-0.0494426	-0.369352	0.229326	0.323653	1.36889	0.670232	-0.0491289	-0.447478	0.998451	0.000313759	0.00202298	0.202051	-0.372782	-1.46793	P68369;P05214
8.59213256835938	8.5798978805542	8.63186931610107	8.58258628845215	8.40749263763428	8.39996814727783	8.75424098968506	8.72743511199951	8.99430370330811	8.64504909515381	9.02345848083496	8.45490550994873	8.6801815032959	8.73396682739258	8.7490406036377		+		mU1_WT					19	19	4	50.1	50.1	9	49.83	0	115.94	7803900000	84	0.812566	-0.0243373	-0.247781	0.0365372	0.290982	2.8332	0.434893	0.0579021	0.836547	0.515163	0.0822394	0.691397	0.132505	-0.23308	-1.79561	P68372;Q9D6F9;P99024;Q9ERD7;CON__ENSEMBL:ENSBTAP00000025008;A2AQ07
7.72289705276489	7.6158447265625	7.44958639144897	7.3677659034729	7.39202833175659	7.35341596603394	7.380699634552	7.28876304626465	6.99366617202759	7.47511911392212	7.55824899673462	7.27362632751465	7.23080635070801	7.27676057815552	7.31014060974121			+	mU1 NR_WT	+	mU1 NR_WT NR			5	5	5	3.8	3.8	3.8	174.24	0	11.739	342520000	17	0.0680149	-0.185297	-2.22195	0.312405	-0.196679	-1.12311	0.0173396	-0.26619	-3.25581	0.02874	-0.0808933	-2.86164	0.659395	-0.0695113	-0.46812	P70170
6.98554992675781	7.52935314178467	6.56354904174805	6.79314565658569	7.22833395004272	6.98200273513794	7.66974449157715	7.68511438369751	6.93626689910889	7.48688364028931	7.26755380630493	7.86419057846069	7.6668267250061	6.87174701690674	7.0232515335083									2	2	2	20.9	20.9	20.9	20.83	0	10.415	488070000	9	0.16639	0.423399	1.57471	0.388948	0.262335	0.943066	0.266848	0.388605	1.22395	0.910541	-0.0347949	-0.117181	0.705614	0.126269	0.400086	P70296
9.73679447174072	9.7679271697998	9.83039665222168	9.57376480102539	9.56251907348633	9.56930351257324	9.66225719451904	9.73086261749268	10.0987825393677	9.67260551452637	9.42399883270264	9.76119041442871	9.52314758300781	9.69576168060303	9.93174266815186									33	33	33	61.6	61.6	61.6	42.785	0	323.31	100930000000	483	0.207422	-0.0959852	-1.41282	0.980392	0.00457486	0.0258308	0.994373	0.000739813	0.00735053	0.341118	0.096725	1.03373	0.984898	-0.00383504	-0.0198937	P70404
7.8781886100769	7.81083059310913	7.91476106643677	6.44945478439331	7.47728061676025	7.84698009490967	7.58529138565063	7.63783979415894	7.72096109390259	7.73583030700684	7.67013072967529	7.01580429077148	7.44835090637207	7.56314849853516	7.84709119796753									5	5	5	6.8	6.8	6.8	108.03	0	12.332	734920000	16	0.745643	0.123539	0.339722	0.661409	0.195665	0.465104	0.913571	-0.04471	-0.113192	0.408273	-0.168249	-0.888909	0.293664	-0.240375	-1.17291	P70414
6.89697360992432	7.43396186828613	7.59768438339233	6.86201047897339	7.13485050201416	7.17884159088135	7.61543464660645	7.39619922637939	7.56881189346313	7.53228282928467	7.43437242507935	6.64335346221924	7.26735925674438	6.54914951324463	7.54129219055176									4	4	4	5.5	5.5	5.5	106.25	0	18.442	334830000	9	0.560732	0.133674	0.615658	0.219015	0.314165	1.40495	0.541084	-0.197369	-0.647816	0.257863	-0.331043	-1.24994	0.134477	-0.511534	-1.78414	P70699
7.96297025680542	7.73141145706177	7.81146097183228	7.76228094100952	7.98795652389526	8.02391052246094	7.79989147186279	7.79806327819824	6.63870239257813	7.92134809494019	7.68480110168457	8.04245758056641	7.90954542160034	7.9827733039856	7.85895204544067									5	5	5	21.8	21.8	21.8	32.133	0	19.56	1073800000	32	0.32181	0.0854245	1.07956	0.284149	-0.40208	-1.19928	0.0909363	0.131401	2.01173	0.549199	0.0459766	0.634448	0.170209	0.533482	1.6013	P82347
7.92317676544189	7.69505262374878	7.79101657867432	7.53066062927246	7.83229160308838	7.79617166519165	7.86502122879028	7.89352893829346	7.32085227966309	7.68427991867065	7.57869911193848	7.76052808761597	7.6876540184021	7.88044214248657	7.57986354827881									4	4	4	14.8	14.8	14.8	32.081	0	29.163	828600000	20	0.237689	0.111777	1.31133	0.180503	-0.207033	-1.5557	0.942245	-0.0078547	-0.075534	0.122379	-0.119631	-1.79748	0.150026	0.199178	1.69923	P82348
8.01561164855957	7.84546995162964	8.08518314361572	7.69137334823608	8.16764259338379	8.24197006225586	8.01283740997314	8.18289947509766	7.46605157852173	7.99902153015137	7.96230268478394	8.14711952209473	8.24598121643066	8.14113616943359	7.84475660324097									7	7	7	35	35	35	34.872	0	33.073	1649500000	44	0.0536711	0.241928	2.39484	0.597133	-0.100284	-0.563966	0.185166	0.185339	1.49648	0.590353	-0.056589	-0.568453	0.166833	0.285623	1.61685	P82349
8.32717514038086	8.27533435821533	8.39785289764404	8.25777435302734	8.44252681732178	8.49171161651611	8.27586364746094	8.35920906066895	7.94572448730469	8.38471221923828	8.62438488006592	8.41537380218506	8.32937717437744	8.29225635528564	8.2999210357666									12	12	12	37.2	37.2	37.2	43.286	0	75.924	3248700000	57	0.220915	0.0777936	1.36603	0.983336	0.00373967	0.0219513	0.6574	0.0196979	0.466374	0.333361	-0.0580957	-1.05188	0.928676	0.0159582	0.0941109	P82350
9.20096015930176	9.17298221588135	9.34672451019287	9.17527961730957	8.53308582305908	8.49301147460938	9.07845687866211	8.9932336807251	9.34564781188965	9.2141284942627	9.26876544952393	8.67910099029541	8.53678607940674	8.53118515014648	9.14860248565674	+		+	mU1 NR_WT;WT NR_WT			+	mU1 NR_mU1	12	12	12	72.8	72.8	72.8	22.417	0	129.64	18907000000	124	0.0291382	-0.44954	-2.85114	0.412906	0.052194	0.892719	0.0163518	-0.500068	-3.30275	0.818383	-0.0505283	-0.239914	0.0253442	-0.552262	-3.15122	P85094
8.23118877410889	8.01038455963135	8.07364463806152	8.15137004852295	8.18904113769531	8.3125581741333	8.1627140045166	8.14210796356201	7.81056833267212	8.19086360931396	7.73488712310791	8.16500663757324	8.2938928604126	8.21950626373291	8.13248348236084									8	8	8	33.8	33.8	33.8	31.775	0	20.255	2002800000	33	0.214609	0.0849583	1.38756	0.178937	-0.204541	-1.56247	0.197836	0.0860753	1.44778	0.983565	0.00111699	0.0214731	0.0679613	0.290616	2.32109	P97370
6.79052352905273	6.78776359558105	6.75350999832153	6.53395891189575	6.75569105148315	6.66425466537476	6.71542930603027	6.72000551223755	7.233642578125	6.48847579956055	7.46583986282349	7.49144554138184	7.51876401901245	6.8163480758667	6.9175853729248					+	mU1 NR_WT NR			4	4	4	9.5	9.5	9.5	54.079	0	9.1123	192930000	9	NaN	0	NaN	NaN	0	NaN	0.0530195	0.469597	2.4038	0.0444918	0.472191	2.53312	0.723925	0.123383	0.373735	P97384
7.83600759506226	7.67383146286011	7.70461368560791	7.74175024032593	8.10866641998291	8.1579704284668	7.87125158309937	8.00207996368408	7.30743169784546	7.59792566299438	8.32925510406494	7.90264987945557	7.95498991012573	7.797447681427	7.74658727645874	+			WT NR_WT					12	12	12	16.8	16.8	16.8	109.65	0	63.287	1182100000	50	0.0065395	0.295941	4.07491	0.982856	0.00582008	0.0225832	0.109113	0.111368	1.88028	0.0591297	-0.184573	-2.32393	0.702113	0.105548	0.40516	P97449
8.92099952697754	8.58340263366699	8.60253715515137	8.35026741027832	8.80108070373535	8.77178573608398	8.61947917938232	8.78046894073486	9.03598976135254	8.29464244842529	8.10944366455078	8.66156673431396	8.75124073028564	8.59504413604736	8.61095809936523									7	7	7	57.4	57.4	57.4	12.496	0	72.721	8200100000	75	0.340094	0.128902	1.03611	0.645377	-0.134276	-0.489241	0.752519	0.0404007	0.330137	0.155819	-0.0885012	-1.62252	0.500155	0.174677	0.726411	P97450
8.13833427429199	8.38205337524414	8.26332855224609	8.20666408538818	8.00774765014648	8.00134468078613	8.10185050964355	8.15241050720215	8.09461116790771	8.25355625152588	8.62487983703613	8.08339500427246	7.99845552444458	8.12251091003418	8.00706481933594	+		+	mU1 NR_WT;WT NR_WT					7	7	7	41	41	41	24.041	0	39.765	1878800000	47	0.0285795	-0.181757	-2.86591	0.619065	0.076754	0.52958	0.0172161	-0.194739	-3.26152	0.794123	-0.0129818	-0.272841	0.102767	-0.271493	-1.99367	P97478
8.18506050109863	8.08859634399414	8.13049411773682	8.11597633361816	8.09268569946289	8.10768508911133	8.15947723388672	8.18667411804199	8.26159572601318	8.18398094177246	8.35979747772217	8.25491046905518	8.1164083480835	8.04704093933105	8.11703872680664		+		mU1_WT					14	12	12	21.5	18.8	18.8	88.25	0	46.903	2109600000	67	0.832727	0.00659871	0.22059	0.0365602	0.138426	2.83266	0.939272	0.0038178	0.0794325	0.956404	-0.00278091	-0.0569896	0.100185	-0.134608	-2.0136	P97742
10.3112030029297	10.3130865097046	10.3409595489502	10.2518815994263	10.3190231323242	10.2607870101929	10.4028625488281	10.4281511306763	10.3323774337769	10.3357381820679	10.0625448226929	10.2942237854004	10.3308191299438	10.2774715423584	10.3727464675903									38	38	38	73.6	73.6	73.6	54.356	0	323.31	352080000000	962	0.301333	0.0484233	1.13073	0.476286	-0.0607292	-0.769631	0.625459	0.0145326	0.514255	0.469709	-0.0338907	-0.771473	0.388659	0.0752618	0.943689	P97807
8.49899959564209	8.52247047424316	8.53725242614746	8.56515121459961	8.33915328979492	8.28641128540039	8.59660816192627	8.54492378234863	8.68050765991211	8.76279830932617	8.75646877288818	8.38639163970947	8.36029052734375	8.40346336364746	8.69878768920898		+		mU1_WT			+	mU1 NR_mU1	6	6	6	49.6	49.6	49.6	24.687	0	123.91	5475500000	49	0.292071	-0.0891943	-1.15483	0.000732662	0.20229	7.34806	0.426225	-0.0687351	-0.853329	0.858405	0.0204592	0.186225	0.0375586	-0.271025	-2.80977	P97823
8.6585168838501	8.27526569366455	8.55620574951172	8.40669345855713	8.07463359832764	8.23451709747314	8.62812328338623	8.63385200500488	9.00134468078613	8.17730522155762	7.6975474357605	8.34617710113525	8.52799034118652	8.33027172088623	8.74606609344482									2	2	2	30.3	30.3	30.3	10.435	0	248.44	5333700000	24	0.638294	-0.081389	-0.494862	0.608726	-0.182105	-0.545699	0.919989	0.0134559	0.104749	0.600229	0.0948448	0.553025	0.588627	0.195561	0.577505	P99028
9.46185874938965	9.49422454833984	9.46573925018311	9.34898567199707	9.28730869293213	9.24963855743408	9.43624210357666	9.39132308959961	9.91074752807617	9.41869926452637	8.99926090240479	9.30228805541992	9.2099437713623	9.21473789215088	9.47555541992188									13	13	13	46.7	46.7	46.7	21.897	0	134.91	46415000000	193	0.109719	-0.101574	-1.87628	0.999319	0.00020051	0.00089666	0.0881597	-0.142071	-2.03412	0.612591	-0.0404968	-0.533916	0.566999	-0.142271	-0.612484	P99029
8.1445426940918	8.13181114196777	8.06039524078369	8.02056884765625	8.19415378570557	8.11541080474854	8.34527587890625	8.20057678222656	7.8900408744812	8.00095462799072	8.82129096984863	7.91153049468994	8.06423282623291	8.10954475402832	8.1993989944458									9	9	2	25.2	25.2	4.8	45.998	0	117.43	1975800000	46	0.0687208	0.124525	2.21445	0.57666	0.148099	0.596759	0.795517	-0.0181527	-0.27094	0.112972	-0.142678	-1.85521	0.54444	-0.166252	-0.649882	Q00897
8.69345474243164	8.46576976776123	8.59958839416504	8.57712364196777	8.83231067657471	8.98829555511475	8.66568374633789	8.88781452178955	7.62577533721924	8.61150074005127	8.18503189086914	8.63622665405273	8.74060726165771	8.79474544525146	8.62553882598877	+			WT NR_WT					17	17	16	57.1	57.1	57.1	38.618	0	113.62	6843300000	121	0.0195512	0.259542	3.16056	0.130385	-0.443215	-1.80814	0.113402	0.115295	1.85247	0.117686	-0.144247	-1.82571	0.0704806	0.55851	2.29191	Q01339
6.90433216094971	7.13899707794189	6.88920068740845	6.75717973709106	6.96921014785767	6.83181667327881	6.73712348937988	6.97065353393555	7.97553730010986	6.87041902542114	7.64238882064819	7.0332818031311	7.23346614837646	7.1047945022583	7.27249145507813			+	mU1 NR_WT	+	mU1 NR_WT NR			4	4	4	30.9	30.9	30.9	17.363	0	10.363	330260000	7	0.659711	-0.0452265	-0.462957	0.104359	0.573688	1.98164	0.049063	0.238581	2.46085	0.0118492	0.283808	3.56544	0.28752	-0.335107	-1.18984	Q01768;P15532
7.31382513046265	7.22683191299438	6.58402299880981	6.98015832901001	7.04756212234497	6.83532428741455	6.40663862228394	7.32768583297729	7.65558004379272	7.31601238250732	7.28441667556763	6.90210342407227	7.00477600097656	6.91616868972778	7.40413188934326									4	4	4	6.1	6.1	6.1	89.321	0	13.798	273580000	6	0.647975	-0.121907	-0.480372	0.130947	0.39246	1.8048	0.884382	0.0305854	0.151719	0.527027	0.152492	0.671278	0.0884453	-0.361875	-2.11157	Q01853
7.31300210952759	7.46423625946045	7.52962303161621	7.4063868522644	7.50183963775635	7.64457654953003	7.60677909851074	7.56692028045654	6.34473085403442	7.4573974609375	8.05013465881348	7.40984869003296	7.58726167678833	7.31829309463501	6.83599472045898	+			WT NR_WT					5	5	5	4.8	4.8	4.8	204.22	0	20.526	398130000	15	0.0332494	0.151717	2.75096	0.746278	-0.144224	-0.341971	0.432724	-0.140463	-0.840723	0.124168	-0.292179	-1.787	0.993783	0.00376189	0.00818892	Q02357
9.24963855743408	9.38763904571533	9.23187732696533	9.25772666931152	9.38904190063477	9.36660957336426	8.95285034179688	9.07073974609375	8.73955631256104	9.17382717132568	8.59439277648926	9.20542049407959	9.15703392028809	9.01957321166992	9.22523212432861		+		mU1_WT					71	71	60	42.2	42.2	35.4	223.56	0	323.31	25126000000	453	0.475456	-0.08691	-0.761064	0.0322669	-0.445795	-2.93973	0.0681912	-0.129905	-2.22007	0.727979	-0.0429955	-0.36451	0.0981278	0.31589	2.02987	Q02566;Q91Z83;P13542;P13541;A2AQP0
11.4389848709106	11.4369096755981	11.338397026062	11.4172554016113	10.9671173095703	11.0810594558716	11.2094078063965	11.1323556900024	11.4043207168579	11.3184185028076	11.5646066665649	11.2500047683716	10.9101810455322	11.3360195159912	11.3943290710449	+			WT NR_WT					81	81	81	79.4	79.4	79.4	59.752	0	323.31	2970500000000	3033	0.00146584	-0.310402	-5.53537	0.762603	0.0212286	0.319027	0.145698	-0.185253	-1.67129	0.335782	0.125149	1.04618	0.204671	-0.206482	-1.45788	Q03265
8.32684803009033	8.16378688812256	8.23050022125244	7.78743934631348	8.23542785644531	8.23522567749023	8.2131986618042	8.25551414489746	7.90934181213379	8.05430698394775	7.14261436462402	8.33677959442139	8.16796684265137	8.41271209716797	8.34376335144043									19	19	19	7.4	7.4	7.4	398.29	0	56.037	2325400000	38	0.398067	0.107698	0.909666	0.182602	-0.425056	-1.54671	0.195028	0.188162	1.45832	0.17786	0.0804639	1.52599	0.0539709	0.613218	2.50783	Q05793
8.94238471984863	8.99445819854736	9.13039779663086	8.91903114318848	8.8263988494873	8.81257247924805	9.02950572967529	9.0769681930542	9.16955661773682	9.07903671264648	9.16235542297363	8.97663402557373	8.89521217346191	9.01644802093506	9.03286075592041							+	mU1 NR_mU1	37	37	37	42.8	42.8	42.8	129.68	0	280.56	15774000000	240	0.495665	-0.0602067	-0.725135	0.0697056	0.140415	2.30077	0.782608	-0.0162792	-0.288586	0.57856	0.0439274	0.587074	0.01581	-0.156694	-3.58387	Q05920
8.64927673339844	8.50834083557129	8.5525951385498	8.64077949523926	8.91279029846191	8.99560928344727	8.68628787994385	8.58927917480469	8.72175312042236	8.44970989227295	8.60444164276123	8.72129917144775	8.60904979705811	8.66249370574951	8.91361808776855									7	7	7	70.4	70.4	70.4	8.2355	0	44.262	8870700000	76	0.0848243	0.208244	2.06197	0.95864	0.00422017	0.0545097	0.112617	0.138867	1.85748	0.571328	-0.0693765	-0.598604	0.246277	0.134647	1.31279	Q06185
6.97761392593384	7.10215902328491	7.24807119369507	7.03674840927124	7.64404439926147	7.28397941589355	7.13225984573364	7.28733158111572	6.65490770339966	7.35389709472656	7.58918762207031	6.58629179000854	7.19354200363159	6.67063570022583	6.81559753417969					+	mU1 NR_WT NR			2	2	2	6.2	6.2	6.2	51.655	0.0013072	7.5576	231100000	11	0.0930487	0.245756	1.99516	0.676774	0.108183	0.442263	0.109685	-0.274631	-1.8765	0.0236021	-0.520387	-3.01323	0.234758	-0.382814	-1.35051	Q06890
7.22811460494995	6.87221765518188	6.91511011123657	6.60654258728027	6.94904613494873	7.04111909866333	7.42798900604248	7.16429328918457	6.89955806732178	6.9059042930603	7.63852167129517	6.65095043182373	6.9670090675354	6.93231725692749	6.77558374404907					+	mU1 NR_WT NR			2	2	2	5.4	5.4	5.4	49.925	0.0023392	5.1313	117940000	3	0.194419	0.240116	1.46062	NaN	0	NaN	NaN	0	NaN	0.0483667	-0.314147	-2.47139	NaN	0	NaN	Q07076
6.68924856185913	6.89416742324829	7.17034959793091	6.72828483581543	6.79884815216064	7.04723596572876	7.17152166366577	6.71803712844849	6.74667501449585	6.63865756988525	7.47093105316162	7.23509883880615	7.26023817062378	7.26733589172363	7.16976261138916			+	mU1 NR_WT	+	mU1 NR_WT NR			2	2	2	0.8	0.8	0.8	273.81	0.0097943	2.5687	107180000	2	0.691353	0.0633981	0.416759	0.761116	0.0815753	0.321109	0.0174907	0.362596	3.24889	0.0324502	0.299198	2.76935	0.257919	0.281021	1.27629	Q07113
9.96321582794189	9.94714450836182	10.1108922958374	9.81414127349854	10.1058502197266	9.92930126190186	10.2578945159912	10.2652425765991	10.1263265609741	10.0688905715942	9.93790912628174	10.1966180801392	10.1554269790649	10.099404335022	10.1257743835449			+	mU1 NR_WT					39	39	39	75	75	75	44.889	0	323.31	194230000000	700	0.119927	0.180724	1.81209	0.363801	0.0855269	0.998672	0.0277111	0.185457	2.88951	0.95575	0.0047338	0.0578455	0.116823	0.0999305	1.89357	Q07417
9.62278366088867	9.58923435211182	9.62234878540039	9.57242965698242	9.66856288909912	9.74928760528564	9.68912220001221	9.77840423583984	9.25171089172363	9.57534980773926	9.67045021057129	9.80409145355225	9.78143215179443	9.82766628265381	9.73939800262451	+		+	mU1 NR_WT;WT NR_WT			+	mU1 NR_mU1	26	26	26	41.5	41.5	41.5	52.697	0	205.09	65614000000	241	0.00569367	0.119645	4.19875	0.382241	-0.102529	-0.957603	0.000170808	0.186448	8.25565	0.0800468	0.0668027	2.10388	0.0444961	0.288977	2.66723	Q08857
7.15727519989014	6.48630523681641	6.36792039871216	6.63752841949463	7.28382110595703	7.27473497390747	6.57465553283691	7.0666241645813	6.84498023986816	6.79303789138794	7.353600025177	6.99640512466431	6.21266889572144	7.30832004547119	6.60905075073242									2	2	2	15.8	15.8	15.8	20.42	0.0023669	5.5361	198860000	8	0.158218	0.387702	1.6114	0.245225	0.334949	1.31617	0.699263	0.119354	0.405371	0.390323	-0.268348	-0.925687	NaN	0	NaN	Q0VBB0
7.4378457069397	7.48754835128784	7.5233302116394	6.81950807571411	6.86038017272949	7.37997579574585	7.33623933792114	7.38737201690674	7.62105178833008	7.50471544265747	7.73745346069336	7.30545902252197	7.19769382476807	6.94638204574585	7.5393648147583									4	4	4	5.1	5.1	5.1	103.32	0	11.488	403750000	12	0.729419	-0.0760663	-0.36248	0.198511	0.304015	1.48171	0.747634	-0.0698332	-0.336943	0.973066	0.0062331	0.0351951	0.0619724	-0.373849	-2.3954	Q11011
7.79923009872437	8.10605525970459	8.05667591094971	8.17695903778076	7.87489891052246	8.12577438354492	7.95309734344482	8.11427688598633	6.83390474319458	7.85712718963623	7.513596534729	7.98805904388428	7.75444030761719	7.98526477813721	6.77656936645508									10	10	10	20.1	20.1	20.1	77.795	0	23.167	1284500000	22	0.868832	-0.0177182	-0.172346	0.0657617	-0.633187	-2.34753	0.221962	-0.408647	-1.36251	0.233231	-0.390929	-1.32553	0.61902	0.224541	0.52965	Q14C51
6.82954931259155	6.61277437210083	7.05548477172852	7.37006855010986	7.13497734069824	6.41575813293457	7.43477630615234	7.62415838241577	7.89392280578613	7.44357585906982	7.59151983261108	6.92786645889282	6.6206431388855	7.36514902114868	7.54161691665649		+		mU1_WT					3	3	3	4.8	4.8	4.8	106.78	0	9.8566	326610000	6	0.57265	0.185448	0.59649	0.0282994	0.676037	3.05386	0.598645	0.14685	0.555489	0.912753	-0.0385987	-0.114269	0.108264	-0.529187	-1.95293	Q14CH7
9.26632595062256	9.28688335418701	9.28443050384521	9.17254447937012	9.05861568450928	9.06565475463867	9.21237373352051	9.25818252563477	8.90364837646484	9.22049999237061	9.21335792541504	9.14488506317139	9.09722232818604	9.24968719482422	9.14949607849121									30	30	30	78.4	78.4	78.4	52.816	0	312.85	23322000000	294	0.121582	-0.103839	-1.8022	0.19272	-0.140044	-1.50477	0.0702122	-0.0922234	-2.19886	0.853171	0.011616	0.193207	0.636982	0.0478206	0.502009	Q1XH17
9.08350276947021	9.10947704315186	9.22688293457031	9.08289337158203	8.94868183135986	8.83323669433594	9.1016092300415	9.13551425933838	9.35974025726318	9.21958446502686	9.29364967346191	9.12645626068115	8.9366340637207	9.07631301879883	9.35204696655273		+		mU1_WT					17	17	17	35.9	35.9	35.9	54.208	0	231.02	22448000000	199	0.172401	-0.120929	-1.5488	0.0260336	0.165302	3.1274	0.976708	-0.00282645	-0.0304341	0.329135	0.118102	1.06192	0.178887	-0.168129	-1.56269	Q2TPA8
8.59108734130859	8.56387233734131	8.7089900970459	8.59138774871826	8.27346420288086	8.16840934753418	8.67013454437256	8.70927810668945	6.87780380249023	8.62509632110596	8.64947128295898	8.36897468566895	8.49953556060791	8.27153968811035	8.526442527771			+	mU1 NR_WT					9	9	9	42.4	42.4	42.4	29.395	0	95.419	5100700000	65	0.303908	-0.158513	-1.12414	0.304465	-0.563044	-1.14388	0.0267143	-0.197211	-2.91761	0.804429	-0.0386984	-0.258814	0.49369	0.365833	0.73797	Q3TBW2
9.07357215881348	9.02832698822021	9.08951663970947	9.02411651611328	9.07265377044678	9.05227088928223	9.18673038482666	9.22868251800537	9.11707210540771	9.04493141174316	8.96519184112549	9.20002937316895	9.0609245300293	9.15081787109375	9.17900562286377			+	mU1 NR_WT					13	13	13	61	61	61	34.69	0	265.33	19126000000	172	0.12789	0.0812013	1.76566	0.792906	-0.0114846	-0.276946	0.0354357	0.0938113	2.70297	0.819157	0.01261	0.238869	0.09668	0.105296	2.04153	Q3TC72
7.7583212852478	7.78143930435181	8.12342739105225	7.41008520126343	7.66186952590942	7.80680370330811	7.58163118362427	7.77681732177734	7.25906801223755	7.86471891403198	7.44856595993042	7.89859914779663	7.58818197250366	7.7652587890625	7.6205005645752									2	2	2	10	10	10	27.268	0	8.0001	862500000	18	0.704606	-0.0615379	-0.397713	0.333636	-0.244201	-1.06974	0.767561	-0.0501832	-0.309289	0.902005	0.0113547	0.128431	0.310173	0.194017	1.1289	Q3THF9
8.40561962127686	8.39209842681885	8.64112663269043	8.45945262908936	8.32302474975586	8.48049545288086	8.67165374755859	8.69873523712158	8.43654441833496	8.54783630371094	8.87065505981445	8.64058113098145	8.45726108551025	8.53633117675781	8.44150638580322									27	27	27	34.8	34.8	34.8	107.83	0	150.07	5403400000	90	0.536507	0.068903	0.655413	0.31356	0.143771	1.12013	0.567202	0.0443456	0.605223	0.812665	-0.0245574	-0.247646	0.450484	-0.0994253	-0.818157	Q3TL44
8.1408224105835	8.1926794052124	8.41808605194092	8.34774017333984	8.10212516784668	7.8533148765564	8.42411327362061	8.31001281738281	8.61795425415039	8.42370414733887	8.29688453674316	8.22636795043945	8.12577438354492	8.15878486633301	8.50328636169434									6	6	6	35.5	35.5	35.5	31.852	0	74.165	3233400000	52	0.495757	-0.10244	-0.724974	0.17852	0.171349	1.56428	0.849779	-0.0212786	-0.197738	0.612699	0.0811619	0.533751	0.193058	-0.192628	-1.5034	Q3TLP5
8.05065059661865	7.80486154556274	8.05891895294189	8.23777008056641	7.28733158111572	7.17736864089966	7.9608416557312	7.89969444274902	7.57873106002808	8.11524391174316	7.96596813201904	7.18446445465088	6.7522144317627	6.94317722320557	8.12619590759277			+	mU1 NR_WT					4	4	4	22.5	22.5	22.5	33.309	0	24.873	1218200000	20	0.0850466	-0.456741	-2.06008	0.414381	-0.151403	-0.889696	0.0479231	-0.786537	-2.47818	0.402466	-0.329796	-0.900671	0.159488	-0.635135	-1.65178	Q3TMP8
6.88126993179321	7.35272264480591	7.45064926147461	7.49369478225708	7.36970281600952	7.40560245513916	6.88881778717041	6.4830961227417	7.68763589859009	7.48235893249512	7.52900123596191	6.51980400085449	7.08054828643799	7.5660719871521	7.59056329727173									4	4	4	14.2	14.2	14.2	37.827	0	12.021	370430000	9	0.360387	-0.257779	-0.990034	0.180387	0.271748	1.5562	0.727863	-0.105337	-0.364675	0.664111	0.152442	0.456469	0.268266	-0.377085	-1.2451	Q3TUH1
7.93066883087158	7.84290885925293	8.05392360687256	7.84635543823242	7.24978494644165	6.57533931732178	8.06209278106689	8.03096389770508	6.37185144424438	8.01544380187988	7.58034133911133	7.50474262237549	7.52012968063354	7.79264402389526	7.79974031448364			+	mU1 NR_WT					5	5	5	12.3	12.3	12.3	65.335	0	21.249	929820000	26	0.26685	-0.438919	-1.22395	0.210971	-0.595919	-1.43421	0.0329362	-0.26415	-2.75811	0.648591	0.174769	0.479455	0.468001	0.331769	0.784996	Q3U186
7.84189128875732	7.96164417266846	8.00436401367188	7.77958202362061	8.20827960968018	7.8155312538147	8.00371932983398	8.09380722045898	6.7710165977478	7.89955234527588	7.37150478363037	8.1099157333374	7.90799140930176	6.81796836853027	8.04095840454102									7	7	7	11.9	11.9	11.9	118.46	0	19.888	1302700000	15	0.221839	0.133464	1.36292	0.10658	-0.549512	-1.96518	0.584746	-0.177662	-0.577278	0.360669	-0.311126	-0.98941	0.446978	0.371851	0.824909	Q3U2A8
6.67322683334351	7.38694477081299	7.36584329605103	7.46839141845703	6.69413900375366	6.95908784866333	7.03588724136353	6.56667518615723	8.29234504699707	7.37879753112793	7.40767192840576	7.06427240371704	6.40438556671143	6.73103904724121	7.59086418151855									6	6	6	13.6	13.6	13.6	63.17	0	21.415	493470000	13	0.1056	-0.409654	-1.90388	0.217483	0.469337	1.41044	0.412537	-0.275961	-0.880355	0.645473	0.133693	0.484106	0.114775	-0.745298	-1.90735	Q3UHB1
8.27900505065918	8.24816989898682	8.0354700088501	8.05819797515869	7.89286804199219	7.79807043075562	7.89637756347656	7.77332544326782	8.13519668579102	7.93498277664185	7.92641448974609	7.85710334777832	7.80672264099121	7.89237308502197	7.81786251068115	+		+	mU1 NR_WT;WT NR_WT					6	6	6	53.9	53.9	53.9	15.515	0	26.292	1691800000	41	0.00428542	-0.31505	-4.45947	0.156914	-0.156346	-1.66441	0.00325321	-0.311695	-4.72143	0.93139	0.00335503	0.0897726	0.0529886	-0.155349	-2.52287	Q3UIU2
9.47353076934814	9.52037906646729	9.56382465362549	9.34611797332764	9.5911979675293	9.58152866363525	9.57433223724365	9.53763008117676	9.33000755310059	9.60549926757813	9.4421501159668	9.53863620758057	9.53486347198486	9.49815845489502	9.40962886810303									39	39	39	74.4	74.4	74.4	61.378	0	323.31	51317000000	551	0.0971598	0.0952091	1.96396	0.855026	-0.0167441	-0.192364	0.740441	0.0193586	0.346997	0.0565665	-0.0758505	-2.35634	0.65372	0.0361028	0.476641	Q3ULD5
7.76101779937744	7.78443193435669	8.02657413482666	7.96179580688477	6.90309619903564	6.4350733757019	7.75038480758667	8.08382511138916	8.20782279968262	7.96717357635498	7.39340400695801	7.77913475036621	6.92050361633301	7.12358617782593	8.10332489013672									8	8	8	18.2	18.2	18.2	85.995	0	25.731	1236800000	15	0.17559	-0.59036	-1.5354	0.904469	-0.0273215	-0.126229	0.207183	-0.401818	-1.41367	0.70167	0.188542	0.401918	0.374972	-0.374496	-0.973597	Q3ULF4
7.78588485717773	7.9055962562561	7.95472002029419	7.96875381469727	7.95041370391846	7.84073305130005	7.93762302398682	7.99196100234985	8.060622215271	7.94383573532104	6.93418216705322	7.9807710647583	7.77661418914795	8.01665687561035	8.04921817779541									9	9	9	35.3	35.3	35.3	38.225	0	24.737	1314800000	51	0.63206	0.026444	0.504255	0.434467	-0.257525	-0.849332	0.508498	0.0520763	0.702833	0.723757	0.0256324	0.370473	0.360761	0.309602	1.00561	Q3ULJ0;P13707
7.73412752151489	7.74140357971191	7.88657522201538	7.73921632766724	7.75509691238403	7.80213022232056	7.59888887405396	7.8043098449707	7.51164293289185	7.79507303237915	7.70790243148804	7.67822694778442	7.78283071517944	7.66045761108398	7.6502685546875									9	9	9	14.2	14.2	14.2	81.699	0	33.12	810030000	24	0.584691	-0.0352242	-0.577365	0.26513	-0.103791	-1.25444	0.137225	-0.0823847	-1.7147	0.44146	-0.0471605	-0.823993	0.796929	0.0214065	0.271404	Q3UQ84
7.04917907714844	7.10352993011475	7.00970602035522	6.93105602264404	6.24869823455811	6.41231918334961	7.08917093276978	6.94997119903564	8.49281597137451	7.01468849182129	7.63088369369507	6.45960569381714	7.21469068527222	7.14432525634766	7.30122518539429									5	5	5	5.9	5.9	5.9	96.932	0	34.289	596750000	7	0.143251	-0.348328	-1.68357	0.114577	0.689428	1.9087	0.974279	0.00659394	0.0336097	0.252632	0.354922	1.26544	0.169079	-0.682834	-1.60647	Q3URD3
8.40017509460449	8.47843647003174	8.5477991104126	8.32954025268555	8.64887714385986	8.54276275634766	8.48355865478516	8.59114265441895	8.63488006591797	8.45776081085205	8.54513359069824	8.5427131652832	8.45353221893311	8.54500961303711	8.58145999908447									14	14	14	33.3	33.3	33.3	65.076	0	59.742	5327900000	94	0.0736601	0.127598	2.16409	0.189605	0.106937	1.51745	0.144036	0.091691	1.67961	0.450101	-0.0359066	-0.80768	0.787232	-0.0152461	-0.284779	Q3URE1
7.5295844078064	7.72092771530151	7.82771158218384	7.65525388717651	7.66997671127319	7.7959566116333	7.73505592346191	7.78672313690186	8.07576560974121	7.75102472305298	7.85145998001099	7.62534332275391	7.56755590438843	7.6883397102356	7.93589019775391									3	3	3	17	17	17	26.031	0	12.668	834340000	21	0.390962	0.0635587	0.924354	0.112978	0.209381	1.91966	0.844732	0.0209129	0.204489	0.637838	-0.0426458	-0.495547	0.192233	-0.188468	-1.50674	Q3UUI3
7.96759939193726	8.00753402709961	7.9495849609375	8.04004859924316	7.90265560150146	7.89160442352295	7.87892961502075	7.87311124801636	8.18943405151367	7.97535371780396	7.20289421081543	7.76595163345337	7.59727811813354	7.86879110336304	7.97262382507324	+			WT NR_WT					9	9	9	19	19	19	61.18	0	19.997	1417700000	41	0.00270521	-0.104617	-4.90208	0.458945	-0.201964	-0.802023	0.0608728	-0.190031	-2.30272	0.328187	-0.0854141	-1.06418	0.966199	0.0119338	0.0445386	Q3UV70
6.89852619171143	6.86777639389038	7.08839797973633	7.05325222015381	6.95975589752197	6.7154369354248	7.81759834289551	7.86516332626343	7.30683469772339	6.69321298599243	8.7761926651001	6.7417631149292	6.78269672393799	6.52810001373291	7.07770919799805									11	3	3	23.4	12.8	12.8	35.257	0	21.418	7772000000	86	0.27135	0.3625	1.21121	0.290963	0.615092	1.18031	NaN	0	NaN	0.127657	-0.556921	-1.76698	0.190032	-0.809513	-1.5157	Q3V132
8.40003681182861	8.39061737060547	8.40752696990967	8.47778701782227	8.4304780960083	8.40979766845703	8.51495933532715	8.53286933898926	8.27873039245605	8.35086822509766	8.01753425598145	8.42963886260986	8.27088832855225	8.46695613861084	8.49749660491943									12	12	12	27.9	27.9	27.9	54.313	0	72.663	3828100000	83	0.195347	0.0530341	1.45712	0.0687395	-0.203281	-2.31195	0.961213	-0.00274706	-0.0506964	0.380149	-0.0557811	-0.947109	0.110681	0.200534	1.93568	Q3V384
8.0797233581543	8.25333786010742	8.47427463531494	8.33096122741699	7.88594341278076	8.06718254089355	8.26611423492432	8.12234687805176	8.50023651123047	8.40752696990967	8.70058250427246	7.93770837783813	8.10284519195557	8.24792385101318	8.42445659637451									11	11	11	30.7	30.7	30.7	65.804	0	59.571	2768500000	40	0.130453	-0.199178	-1.75131	0.0926378	0.251541	2.07509	0.452239	-0.106341	-0.803677	0.502331	0.0928367	0.713503	0.0536552	-0.357882	-2.51263	Q499X9
8.25623607635498	8.14270210266113	8.00727844238281	7.80565023422241	8.40959548950195	8.60167980194092	7.92212820053101	8.1486644744873	7.93338584899902	7.8230242729187	7.28980016708374	8.23332595825195	8.32813453674316	8.08891487121582	7.83486557006836									4	4	4	21.4	21.4	21.4	24.918	0	16.452	2273200000	37	0.266135	0.21755	1.22599	0.125679	-0.370897	-1.8367	0.653261	0.0683435	0.472509	0.446989	-0.149207	-0.813527	0.0898611	0.43924	2.09905	Q4VAE3
7.45545387268066	7.38515901565552	7.53104448318481	7.6418604850769	7.51458740234375	7.53846073150635	7.66720056533813	7.46614074707031	8.22256088256836	7.76183748245239	8.25885677337646	7.91207838058472	7.70802116394043	8.01736736297607	8.02514171600342		+	+	mU1 NR_WT;mU1_WT	+	mU1 NR_WT NR			5	5	5	19.7	19.7	19.7	24.739	0	16.265	802310000	17	0.55811	0.0432179	0.61991	0.0116096	0.577706	3.88275	0.00419724	0.412273	4.47892	0.00498117	0.369055	4.32028	0.348117	-0.165433	-1.03498	Q501J2
8.23487186431885	8.20566463470459	8.08646678924561	8.44288730621338	8.36917877197266	7.77705669403076	8.36498260498047	8.42445659637451	8.23884868621826	8.37515163421631	9.6830472946167	8.14702701568604	8.36049842834473	7.94100904464722	8.14934253692627									5	5	5	43	43	43	20.11	0	73.684	4266600000	54	0.961481	-0.00855398	-0.0503453	0.242649	0.52321	1.32449	0.442926	-0.0930034	-0.82121	0.64694	-0.0844494	-0.481916	0.182486	-0.616213	-1.54721	Q505D7
8.416823387146	8.25141906738281	8.38692665100098	8.41427135467529	8.43407344818115	8.56974792480469	8.65927886962891	8.75267028808594	8.33817768096924	8.5170373916626	8.45161724090576	8.52296543121338	8.52483749389648	8.57231426239014	8.5885181427002	+		+	mU1 NR_WT;WT NR_WT					5	5	5	51.3	51.3	51.3	11.655	0	54.883	4446000000	25	0.0234194	0.236583	3.01926	0.333394	0.0682507	1.07033	0.00489775	0.184799	4.33578	0.486418	-0.0517838	-0.741449	0.059332	0.116548	2.43067	Q5F285
8.10277652740479	7.98315715789795	8.00302982330322	8.37480354309082	7.69157648086548	7.35258769989014	8.37005043029785	8.226393699646	8.06989002227783	8.40372085571289	8.45877361297607	8.10506725311279	8.22968196868896	7.59833097457886	7.8931622505188									7	7	7	29.9	29.9	29.9	33.689	0	45.69	2031500000	62	0.446952	-0.20579	-0.813597	0.24333	0.194853	1.32228	0.37128	-0.159381	-0.966152	0.870945	0.0464085	0.169539	0.125091	-0.354234	-1.84035	Q5HZI9
6.83016681671143	6.76990509033203	6.46139907836914	7.23885869979858	6.76416397094727	6.70355749130249	6.85579252243042	6.36151361465454	6.85382843017578	6.4880952835083	7.28126096725464	6.70026588439941	7.27790689468384	6.80626153945923	6.41569995880127									2	2	2	3.7	3.7	3.7	62.875	0.0072091	3.1284	122210000	4	NaN	0	NaN	NaN	0	NaN	0.920358	-0.0250489	-0.104264	0.560992	0.128777	0.615239	0.805248	-0.0743613	-0.259977	Q5IRJ6
9.41567420959473	9.4125280380249	9.38325881958008	9.41432189941406	9.48072528839111	9.40346336364746	9.43824195861816	9.4921875	9.34713459014893	9.41163635253906	9.11327457427979	9.31762504577637	9.39982986450195	9.36548805236816	9.54672813415527									15	15	15	48.4	48.4	48.4	32.994	0	161.44	37184000000	214	0.073383	0.0472088	2.16682	0.190075	-0.115764	-1.51552	0.985122	0.000972033	0.0194382	0.420104	-0.0462368	-0.865334	0.277131	0.116736	1.21923	Q5M8N4
7.49047803878784	7.45940732955933	7.81357431411743	7.3233847618103	7.36002492904663	7.224196434021	6.49750518798828	7.59418249130249	6.7637619972229	6.82348489761353	7.37499046325684	6.76986694335938	6.7361364364624	6.37949132919312	7.04096031188965		+	+	mU1 NR_WT;mU1_WT					4	4	4	16.8	16.8	16.8	41.873	0	35.578	345680000	9	0.221035	-0.352734	-1.36562	0.0471012	-0.534299	-2.61994	0.00360497	-0.790097	-4.62275	0.159875	-0.437364	-1.60382	NaN	0	NaN	Q5SSK3
7.6684045791626	7.61888456344604	7.8121509552002	7.86907339096069	7.77504968643188	7.7979736328125	7.58835029602051	7.56535196304321	7.45580387115479	7.66926097869873	8.17635154724121	7.42507743835449	7.83385419845581	7.84498023986816	7.63810968399048									7	7	7	29	29	29	32.63	0	22.049	780680000	25	0.502331	-0.060447	-0.713502	0.90138	0.0250104	0.130339	0.640417	-0.056623	-0.491675	0.974812	0.003824	0.0329124	0.71817	-0.0816334	-0.381983	Q5SWT3
8.62169551849365	8.5689640045166	8.44233894348145	8.38836765289307	8.24266529083252	8.30858612060547	8.4585018157959	8.53443241119385	8.66792011260986	8.35086822509766	8.66473579406738	8.45713996887207	8.36323547363281	8.54415512084961	8.49968719482422									10	10	10	29.5	29.5	29.5	63.232	0	120.73	4665300000	81	0.215433	-0.119295	-1.38472	0.629894	0.0558332	0.512862	0.576414	-0.0392871	-0.590486	0.340572	0.080008	1.035	0.381353	-0.0951203	-0.959545	Q5U458
7.42494678497314	7.3121771812439	7.20566463470459	7.21632432937622	7.75693273544312	7.71528434753418	7.14116764068604	7.4845986366272	7.57956647872925	7.2146053314209	7.6273021697998	7.54767608642578	7.29501724243164	7.03806352615356	7.33421230316162									4	4	4	17.5	17.5	17.5	41.963	0	14.604	400060000	20	0.168805	0.234718	1.5642	0.199833	0.184046	1.47654	0.908356	0.0139641	0.120059	0.255439	-0.220754	-1.25709	0.349579	-0.170082	-1.03154	Q5XJY4
10.4640865325928	10.558180809021	10.4265441894531	10.3637056350708	10.5534343719482	10.5048236846924	10.3903522491455	10.3891839981079	10.7133731842041	10.4316854476929	10.1622953414917	10.4620685577393	10.3792333602905	10.4171724319458	10.5357751846313									97	97	97	71.4	71.4	71.4	116.45	0	323.31	492440000000	1572	0.916889	0.00631928	0.108825	0.907246	-0.0173446	-0.122538	0.933873	-0.00456691	-0.0865132	0.845123	-0.0108862	-0.203965	0.930293	0.0127777	0.0919704	Q60597
7.76377248764038	7.72232961654663	8.03378582000732	7.597815990448	7.1048526763916	7.56700277328491	7.92575025558472	7.64854526519775	7.99827241897583	7.45035696029663	7.92035722732544	7.61109638214111	7.58521270751953	7.47984886169434	8.01241493225098									5	5	5	16.6	16.6	16.6	47.037	0	37.629	828040000	25	0.303502	-0.217888	-1.12517	0.956791	0.0102362	0.0569501	0.497674	-0.107283	-0.721619	0.611875	0.110605	0.535018	0.580685	-0.117519	-0.590256	Q60634
7.97178602218628	7.76951742172241	7.7713451385498	7.86983013153076	7.15314388275146	7.3849983215332	7.69424533843994	7.81814670562744	7.86336469650269	7.82441854476929	8.09506511688232	7.65586805343628	7.47101306915283	7.40483379364014	7.93480634689331									7	7	7	8.4	8.4	8.4	71.275	0	17.643	829590000	35	0.0796813	-0.332986	-2.10719	0.40778	0.0819964	0.903293	0.123861	-0.228989	-1.78879	0.606901	0.103997	0.542685	0.104707	-0.310986	-1.97903	Q60714;Q91VE0
8.91791534423828	8.89842891693115	9.00603771209717	8.91543674468994	9.06531810760498	9.01944828033447	8.9721097946167	9.09548282623291	8.89704990386963	8.98591136932373	8.58060550689697	8.99896049499512	8.94004344940186	9.03750610351563	8.94889163970947	+			WT NR_WT					16	16	16	47.3	47.3	47.3	48.605	0	191.11	13865000000	160	0.0289278	0.103635	2.85666	0.337548	-0.113266	-1.06023	0.208308	0.0468957	1.40966	0.159179	-0.0567393	-1.607	0.192508	0.160161	1.50562	Q60759
7.51760482788086	7.31766653060913	7.29933309555054	7.20650196075439	6.95721006393433	6.9687328338623	7.49562740325928	7.31058692932129	7.93703603744507	7.35979747772217	7.45045137405396	6.49570369720459	6.40719270706177	7.252610206604	7.31426763534546									4	4	4	11	11	11	46.551	0	11.62	351970000	8	0.342887	-0.152237	-1.02964	0.202972	0.247152	1.46438	0.11037	-0.467833	-1.87201	0.295162	-0.315596	-1.14672	0.0773311	-0.714985	-2.21791	Q60766
10.142201423645	10.0288152694702	10.0487909317017	10.0962142944336	10.1469955444336	10.3046627044678	10.2114143371582	10.1834125518799	10.1497735977173	10.0906810760498	9.90878009796143	10.183611869812	10.2147645950317	10.3088626861572	10.0682229995728	+			WT NR_WT					31	31	31	86.4	86.4	86.4	31.732	0	323.31	206000000000	448	0.0199669	0.132616	3.14397	0.683554	-0.0292606	-0.432269	0.0849512	0.11486	2.06089	0.777212	-0.0177557	-0.295993	0.148545	0.144121	1.70693	Q60930
10.0771131515503	9.99578475952148	10.0397310256958	10.030478477478	10.1362447738647	10.1728944778442	10.2144727706909	10.179723739624	10.1283988952637	10.0559511184692	9.95443534851074	10.2112007141113	10.1245698928833	10.2585172653198	10.134973526001	+		+	mU1 NR_WT;WT NR_WT					28	28	28	70	70	70	30.752	0	323.31	192220000000	441	0.000925195	0.140057	6.04776	0.830935	0.0104849	0.224933	0.00658818	0.146538	4.06834	0.861944	0.00648141	0.18151	0.0614345	0.136054	2.40245	Q60931
10.2588052749634	10.1840953826904	10.1583623886108	10.0661392211914	10.4452457427979	10.6741352081299	10.3940486907959	10.3626708984375	10.5291862487793	10.0681114196777	10.0885610580444	10.5066404342651	10.6309566497803	10.5622215270996	10.1278495788574	+			WT NR_WT					37	37	37	86.8	86.8	86.8	32.351	0	323.31	418780000000	746	0.00967712	0.302175	3.7352	0.664961	0.061769	0.459801	0.0512204	0.290066	2.42917	0.930333	-0.0121081	-0.0911592	0.268038	0.228297	1.24578	Q60932
9.00638008117676	9.06472015380859	9.05591297149658	8.92701053619385	9.19273471832275	9.13551425933838	9.01886653900146	9.01815891265869	8.95518684387207	8.96507930755615	9.28782367706299	9.04351902008057	9.03814315795898	9.06145286560059	9.04770278930664									26	26	26	48.1	48.1	48.1	71.742	0	211.38	18440000000	263	0.198563	0.0778127	1.44508	0.596086	0.0558573	0.565627	0.32564	0.0341985	1.0703	0.358945	-0.0436141	-0.99324	0.822483	-0.0216588	-0.236425	Q60936
8.31086349487305	8.24276542663574	8.05618000030518	8.19161891937256	8.46211338043213	8.42352485656738	8.14444923400879	8.15072536468506	7.67444753646851	7.95695543289185	7.50672149658203	8.19340324401855	8.0963191986084	8.38230514526367	7.88751602172852		+		mU1_WT			+	mU1 NR_mU1	6	6	6	20.6	20.6	20.6	26.809	0	53.936	2225500000	45	0.384645	0.0948462	0.937589	0.0121569	-0.487649	-3.83731	0.621486	-0.0604711	-0.520302	0.290131	-0.155317	-1.15996	0.0480502	0.427178	2.60342	Q60994
8.59613513946533	8.64516639709473	8.64132499694824	8.73389530181885	8.58805847167969	8.46905612945557	8.70061683654785	8.70579528808594	9.02673721313477	8.61205196380615	9.30339050292969	8.64452743530273	8.5622091293335	8.81825923919678	8.79009532928467									25	25	25	41	41	41	82.58	0	143.49	8825800000	138	0.565777	-0.0382488	-0.607515	0.115227	0.326596	1.90429	0.487526	0.0496423	0.739482	0.327784	0.0878911	1.06515	0.190082	-0.276954	-1.51549	Q61102
7.98661518096924	7.9580717086792	8.03189277648926	8.07602119445801	7.84707260131836	7.96286153793335	8.07272815704346	8.10441875457764	7.9566388130188	8.1689977645874	8.32629489898682	8.12907695770264	7.83320426940918	8.18452072143555	8.06822299957275									9	9	9	9.8	9.8	9.8	121.15	0	26.542	1675000000	47	0.806176	-0.01638	-0.256441	0.206251	0.137494	1.45188	0.635969	0.040606	0.498359	0.577701	0.056986	0.588439	0.483239	-0.0968876	-0.756884	Q61147;CON__ENSEMBL:ENSBTAP00000031900
7.9287543296814	7.95687866210938	7.97673940658569	8.13997364044189	7.65935516357422	7.57398509979248	7.79737854003906	7.88031625747681	7.85970258712769	7.93477630615234	7.85113000869751	7.43263244628906	7.63159608840942	7.68107843399048	7.95109462738037	+		+	mU1 NR_WT;WT NR_WT					5	5	5	26.3	26.3	26.3	21.778	0	14.76	1095600000	36	0.0170258	-0.272828	-3.27039	0.106676	-0.118717	-1.96447	0.0314472	-0.326486	-2.79314	0.687216	-0.0536584	-0.422741	0.166323	-0.207769	-1.61923	Q61171
7.36720657348633	7.3655252456665	7.49070262908936	7.4663782119751	7.73555898666382	7.52613258361816	7.43266487121582	7.34904432296753	7.59999227523804	7.62228679656982	7.48385047912598	7.24713802337646	7.38858079910278	7.46097278594971	7.44836616516113		+		mU1_WT			+	mU1 NR_mU1	5	5	5	10.8	10.8	10.8	61.422	0	11.822	485890000	11	0.360938	0.088397	0.988813	0.0394588	0.146257	2.768	0.561729	-0.0361887	-0.614046	0.244336	-0.124586	-1.29062	0.0440433	-0.182445	-2.67576	Q61207
7.09918928146362	7.62877702713013	7.56682634353638	7.45934724807739	7.66239881515503	7.74083614349365	7.63865900039673	7.65045309066772	7.63512182235718	7.55840873718262	7.16578960418701	6.41438293457031	7.4967360496521	7.52011632919312	7.65435934066772									3	3	3	46.8	46.8	46.8	12.399	0	15.666	548770000	13	0.0998493	0.234552	1.94427	0.940441	0.0145717	0.0785454	0.610521	-0.167136	-0.537101	0.213511	-0.401688	-1.39137	0.636622	-0.181708	-0.502559	Q61387
9.52805519104004	9.61708450317383	9.5392017364502	9.66459465026855	9.50894737243652	9.66341781616211	9.59034061431885	9.50562477111816	10.0578937530518	9.52002429962158	9.50471591949463	9.59176540374756	9.61582374572754	9.62096881866455	9.6503267288208									28	28	28	87.6	87.6	87.6	34.463	0	323.31	74895000000	400	0.699306	-0.0201514	-0.40531	0.525829	0.106977	0.681509	0.384841	0.0324872	0.937175	0.230921	0.0526385	1.33297	0.646626	-0.0744901	-0.487349	Q61425
7.0716609954834	7.14071846008301	7.4446382522583	6.82140064239502	7.17845869064331	6.77189493179321	7.23418807983398	6.74490547180176	7.33755922317505	7.36372470855713	7.65952253341675	7.11813259124756	6.84727096557617	7.23253870010376	7.31908512115479									3	3	3	3	3	3	133.73	0	8.547	202560000	6	0.480593	-0.137243	-0.751833	0.113937	0.333998	1.91307	0.955042	0.00965226	0.0587727	0.409073	0.146895	0.887299	0.0814364	-0.324345	-2.17685	Q61543
8.48798656463623	8.52668857574463	8.61575031280518	8.51272487640381	8.60179901123047	8.53852367401123	8.63948631286621	8.67239379882813	8.68535614013672	8.55325222015381	8.5822229385376	8.61612892150879	8.51158905029297	8.57304573059082	8.75755500793457									19	19	19	46.4	46.4	46.4	54.201	0	105.97	6037600000	125	0.101586	0.0772631	1.93183	0.190474	0.0711562	1.51389	0.231618	0.0787921	1.33072	0.980377	0.00152898	0.0256384	0.917785	0.00763591	0.108545	Q61578
7.89812135696411	7.89830255508423	6.3183708190918	7.71603679656982	7.99372720718384	7.79423713684082	7.54992246627808	7.58373117446899	7.0830397605896	6.56527614593506	7.57195472717285	7.81808710098267	6.82493877410889	7.57234859466553	7.59134292602539									4	4	4	7.7	7.7	7.7	93.703	0	11.49	718110000	13	0.516637	0.272697	0.688881	0.487892	-0.384284	-0.748426	0.989492	-0.00602853	-0.0137283	0.288791	-0.278725	-1.16352	0.332875	0.378256	1.0716	Q61586
8.12639141082764	8.11511135101318	8.16169738769531	8.04032516479492	7.59171009063721	7.40645503997803	7.91761589050293	7.87316942214966	8.35793495178223	7.94738960266113	7.87165832519531	7.46701574325562	7.52882671356201	7.68727922439575	8.26069164276123	+			WT NR_WT					4	4	4	16	16	16	50.537	0	32.957	1584700000	27	0.0154321	-0.413644	-3.34933	0.706157	-0.051887	-0.3993	0.0860514	-0.374928	-2.0516	0.864635	0.0387157	0.177928	0.25053	-0.323041	-1.29928	Q61598;P50396
8.07169818878174	8.10883522033691	8.10489654541016	7.04973030090332	7.97088575363159	7.78259420394897	8.18227195739746	8.28114700317383	7.87194061279297	8.01321697235107	7.62140607833862	7.77410078048706	8.26815700531006	7.89041519165039	8.32056140899658									2	2	2	8.9	8.9	8.9	33.097	0	43.199	1770500000	20	0.467401	0.220435	0.77568	0.995942	0.00173116	0.00534471	0.465681	0.229519	0.778822	0.960437	0.00908387	0.0517116	0.278006	0.227787	1.21672	Q61735
8.2351245880127	8.37540721893311	8.2413969039917	8.11434364318848	8.41655731201172	8.2630443572998	8.21055889129639	8.28162384033203	7.88543462753296	8.19027519226074	9.08307266235352	8.25556182861328	8.29464244842529	8.30877780914307	8.18035507202148									18	18	18	20.9	20.9	20.9	129.33	0	97.648	2933000000	85	0.484999	0.051378	0.74397	0.657475	0.144693	0.470998	0.773302	0.0182662	0.301373	0.551236	-0.0331118	-0.631112	0.693405	-0.126427	-0.417836	Q61738
7.16846799850464	6.6722240447998	6.9551682472229	6.91964721679688	6.97903776168823	7.05630159378052	7.11431074142456	7.16366815567017	6.96012830734253	6.06071805953979	7.97714710235596	6.98168611526489	6.70738649368286	7.25350761413574	7.06445789337158									3	3	3	2.8	2.8	2.8	122.16	0.0012579	6.3857	113200000	8	0.219974	0.149453	1.3692	0.888701	0.0704543	0.147233	0.649243	0.0728827	0.478483	0.547532	-0.07657	-0.637184	0.996177	0.00242837	0.005036	Q61739
8.12283802032471	7.981360912323	7.91574811935425	8.0273904800415	7.92850351333618	7.63176822662354	7.99451971054077	7.96707487106323	7.74640846252441	7.84425973892212	8.20876407623291	7.73870134353638	7.84610795974731	7.75617170333862	7.84984922409058			+	mU1 NR_WT					8	8	8	8.8	8.8	8.8	165.85	0	33.957	1044400000	26	0.214295	-0.131368	-1.38865	0.56697	-0.0786903	-0.612531	0.00647539	-0.214127	-4.08365	0.388045	-0.082759	-0.930445	0.31988	-0.135437	-1.10397	Q61838
10.6698656082153	6.94001817703247	7.76757144927979	6.80016708374023	6.74318027496338	6.71737098693848	7.38911294937134	7.4458065032959	6.7018871307373	7.37803411483765	7.39430236816406	7.09995651245117	6.78633260726929	6.73689031600952	6.86182117462158									59	59	59	50.3	50.3	50.3	113.84	0	323.31	73571000000	146	0.33327	-0.970538	-1.0521	0.45028	-0.886331	-0.818549	0.242215	-1.17316	-1.29717	0.381206	-0.202618	-0.944862	0.236487	-0.286824	-1.34474	Q61941
7.57589197158813	6.82757616043091	6.12871026992798	6.99080038070679	7.53554582595825	7.94502019882202	7.30209016799927	7.87942838668823	6.89764976501465	6.88447237014771	7.75948905944824	7.88323545455933	6.6010913848877	6.54979562759399	7.08627462387085									2	2	2	1.6	1.6	1.6	185.46	0.0054171	3.7243	552450000	6	0.0569438	0.784776	2.35147	0.514435	0.299792	0.701245	0.739675	0.149355	0.34807	0.114091	-0.635422	-1.8481	0.745531	-0.150438	-0.343025	Q62234
6.86422443389893	7.0915355682373	6.69161748886108	7.07367372512817	7.63477945327759	7.52126884460449	7.30074739456177	6.98850584030151	6.8533616065979	7.23331069946289	7.70086288452148	6.44583415985107	7.31071472167969	7.41708946228027	6.78982734680176	+			WT NR_WT					5	5	5	8.1	8.1	8.1	85.73	0	13.278	442510000	12	0.0452404	0.431063	2.52076	NaN	0	NaN	0.814011	0.0606036	0.245825	0.216733	-0.370459	-1.38024	0.458634	-0.271645	-0.802611	Q62351
10.1199817657471	10.0950651168823	10.092264175415	10.0538463592529	10.0349893569946	10.2185354232788	10.1143770217896	10.0495281219482	9.06814861297607	10.0623941421509	10.1371326446533	10.0635957717896	10.2091932296753	10.2176151275635	9.61667537689209									14	14	14	86.6	86.6	86.6	9.3267	0	244.56	151800000000	276	0.759812	0.0140681	0.320008	0.299093	-0.334398	-1.1582	0.670025	-0.0635195	-0.447781	0.617158	-0.0775876	-0.526912	0.453173	0.270878	0.813005	Q62425
7.16037845611572	7.16241502761841	6.98729085922241	6.57307386398315	7.12283802032471	7.1217565536499	6.83948278427124	6.99344968795776	7.33063745498657	6.94097423553467	7.48122978210449	6.87300062179565	6.99737548828125	7.06186676025391	6.84105205535889									2	2	2	5.3	5.3	5.3	46.763	0.0023981	5.67	139750000	15	0.76334	0.0485922	0.315123	0.244283	0.280158	1.3192	0.85906	-0.0274658	-0.185353	0.405098	-0.076058	-0.895323	0.0922944	-0.307623	-2.07802	Q63918
7.78300285339355	7.81225156784058	7.91533660888672	6.35586643218994	8.0963888168335	7.94431495666504	7.75661325454712	8.04000854492188	6.52324962615967	7.95845890045166	7.3778977394104	7.88336610794067	7.87744617462158	6.76203775405884	7.80713558197021									5	5	5	27.6	27.6	27.6	27.883	0	21.262	1041100000	13	0.241	0.492717	1.30095	0.761175	-0.180079	-0.321026	0.810117	0.115882	0.251097	0.232781	-0.376835	-1.32697	0.561489	0.295961	0.621529	Q64105
6.50789165496826	7.05399942398071	6.93895101547241	6.66211223602295	6.91397190093994	6.39362907409668	7.18943405151367	7.27455043792725	7.79070711135864	6.71845436096191	7.54335594177246	6.7102313041687	7.39371538162231	7.10897064208984	7.80581331253052									5	5	5	13.5	13.5	13.5	59.601	0	14.677	273980000	7	0.540822	0.152158	0.64825	0.12961	0.560101	1.81277	0.127898	0.463944	1.76561	0.345646	0.311786	1.02329	0.812762	-0.0961565	-0.249689	Q64133
9.45527172088623	9.50977993011475	9.44604015350342	9.4907865524292	9.57971477508545	9.48860740661621	9.45368480682373	9.42612075805664	9.90096187591553	9.39802646636963	8.93323421478271	9.5371265411377	9.48307323455811	9.53414058685303	9.7180700302124									16	16	16	91.2	91.2	91.2	10.963	0	71.803	55654000000	154	0.762954	0.0115623	0.315657	0.793536	-0.0647287	-0.276078	0.134887	0.092633	1.72714	0.234881	0.0810707	1.32025	0.543579	0.157362	0.651328	Q64433
8.29210090637207	8.27388095855713	8.25760650634766	8.35841083526611	8.26176261901855	8.26297283172607	8.23907375335693	8.32368469238281	8.60250473022461	8.26311492919922	7.70703125	8.29003429412842	8.20515060424805	8.38088035583496	8.47562789916992									15	15	15	29.5	29.5	29.5	61.227	0	44.286	3197700000	69	0.440328	-0.0236263	-0.826147	0.654375	-0.104616	-0.475655	0.521415	0.0424235	0.680758	0.320585	0.0660498	1.08255	0.549088	0.14704	0.642096	Q64516;Q9WU65
8.53330135345459	8.43258476257324	8.42319679260254	8.26878833770752	8.27014255523682	8.25224590301514	8.39892864227295	8.48171520233154	8.62118625640869	8.24092388153076	8.4216365814209	8.10544204711914	8.39960479736328	8.26663112640381	8.44546413421631									21	21	21	38.1	38.1	38.1	80.953	0	69.68	4017800000	65	0.440505	-0.0637097	-0.82581	0.90935	0.0134478	0.119743	0.284928	-0.110182	-1.17387	0.638011	-0.0464725	-0.495288	0.38142	-0.12363	-0.959397	Q64521
6.91889333724976	7.00202560424805	6.80454921722412	7.50145626068115	7.39162588119507	6.97667551040649	6.74642372131348	6.90182256698608	7.86882638931274	6.87808227539063	7.70863342285156	7.11776828765869	7.09883832931519	7.28454351425171	7.76615238189697									3	3	3	19.7	19.7	19.7	21.942	0	11.328	323790000	12	0.807363	-0.0525942	-0.254831	0.231549	0.42845	1.36132	0.279065	0.260095	1.1898	0.182979	0.312689	1.5052	0.616982	-0.168355	-0.532815	Q66GT5
7.48288774490356	7.41156911849976	7.59556245803833	7.61632823944092	7.44048452377319	7.09887742996216	7.64102745056152	6.93716239929199	7.43314552307129	7.4814567565918	7.71903657913208	7.54834032058716	7.13555192947388	7.43296909332275	7.65319299697876									3	3	3	13.4	13.4	13.4	57.401	0	19.594	382630000	7	0.189147	-0.247199	-1.48085	0.855098	0.0179594	0.192267	0.515636	-0.0840733	-0.690589	0.434914	0.163126	0.836506	0.530516	-0.102033	-0.673474	Q66JZ4
7.7746262550354	7.76624917984009	7.81629419326782	7.58709335327148	6.51614904403687	6.40075778961182	7.55606126785278	7.61559247970581	7.78095769882202	7.73790788650513	7.23045587539673	7.21632432937622	7.32143259048462	7.48579216003418	7.95613956451416									5	5	5	4.1	4.1	4.1	191.55	0	22.235	681050000	16	0.0740345	-0.713926	-2.16041	0.382049	-0.152959	-0.958024	0.208528	-0.241144	-1.40888	0.242981	0.472782	1.2948	0.731981	-0.088185	-0.362237	Q68FD5
7.86693668365479	7.92489433288574	7.84743690490723	7.79422283172607	8.07007503509521	8.06246948242188	7.90625429153442	8.07598495483398	8.05910873413086	7.90451002120972	7.8212456703186	7.92181634902954	7.99556064605713	8.15204334259033	8.10903835296631	+		+	mU1 NR_WT;WT NR_WT					6	6	6	31	31	31	33.048	0	115.35	1409500000	28	0.0132093	0.170323	3.47584	0.34103	0.0699155	1.05184	0.0197788	0.186242	3.15143	0.819097	0.0159187	0.238949	0.230671	0.116327	1.3643	Q6NVE9
8.97392177581787	8.9156322479248	9.15381526947021	8.75270175933838	8.82653522491455	8.98336887359619	9.04292964935303	9.19318008422852	8.78614807128906	9.04493141174316	8.62432289123535	8.93105602264404	8.87517166137695	8.91674900054932	8.8915319442749									9	9	9	43.3	43.3	43.3	42.88	0	201.2	13515000000	125	0.597907	0.0624857	0.556638	0.39933	-0.13055	-0.920955	0.60721	-0.0453906	-0.542207	0.210007	-0.107876	-1.40364	0.448266	0.0851597	0.822424	Q6P3A8
9.9848108291626	10.0280418395996	9.90506172180176	9.83473205566406	9.49669456481934	9.68311023712158	9.58681201934814	9.68667221069336	10.1673765182495	9.90136051177979	9.51968383789063	9.6762638092041	9.44790172576904	9.67869091033936	9.77505683898926	+		+	mU1 NR_WT;WT NR_WT					34	34	34	66.8	66.8	66.8	47.473	0	323.31	120070000000	594	0.00199047	-0.324839	-5.21256	0.667486	-0.0753547	-0.456038	0.0113852	-0.293683	-3.59863	0.719911	0.0311561	0.375917	0.273248	-0.218329	-1.23047	Q6P8J7;P30275
9.76285839080811	9.76918506622314	9.84886646270752	9.65693187713623	9.73770141601563	9.64652156829834	9.79773807525635	9.90738487243652	8.81860160827637	9.81872749328613	9.56131649017334	9.80327987670898	9.70914268493652	9.77614879608154	9.36839866638184									86	86	86	69.3	69.3	69.3	156.61	0	323.31	79893000000	885	0.85481	0.012876	0.19102	0.217434	-0.359912	-1.41062	0.41195	-0.0952179	-0.881529	0.381565	-0.108094	-0.944102	0.384202	0.264694	0.953333	Q6PB66
8.37504100799561	8.25890064239502	8.28927707672119	8.20278835296631	8.25462055206299	8.28934383392334	8.31485652923584	8.38424587249756	8.20536708831787	8.38024711608887	8.16784858703613	8.21537303924561	8.28567028045654	8.4690113067627	8.2838659286499									36	15	14	38	19.8	18.7	112.22	0	51.242	3041200000	69	0.541522	0.0292649	0.647092	0.679913	-0.0303475	-0.437629	0.641125	0.0319784	0.490612	0.965902	0.00271344	0.0445623	0.493785	0.0623259	0.737799	Q6PIE5
9.15742683410645	9.08206653594971	9.25548934936523	8.9044885635376	9.13874435424805	9.19290161132813	9.21574306488037	9.29841613769531	9.11139678955078	9.14432525634766	8.71885871887207	9.18822479248047	9.05979061126709	9.19406986236572	9.14668560028076									20	20	20	53.8	53.8	53.8	51.126	0	138.48	22240000000	223	0.218792	0.111583	1.37321	0.486125	-0.108341	-0.751632	0.57752	0.0473249	0.588726	0.206689	-0.0642586	-1.41544	0.251445	0.155666	1.2964	Q71RI9
9.56610774993896	9.51083946228027	9.51332378387451	9.48709583282471	9.62590885162354	9.6288480758667	9.46005535125732	9.38075351715088	8.63805961608887	9.40226173400879	9.30884170532227	9.55213260650635	9.47937393188477	9.51074600219727	9.30877780914307									6	6	6	84.5	84.5	84.5	6.3814	0	248.94	46329000000	141	0.94573	0.00454974	0.0709669	0.103045	-0.402954	-1.99156	0.351168	-0.0565841	-1.0107	0.483016	-0.0611339	-0.747503	0.161706	0.34637	1.64107	Q78IK2
9.24816989898682	9.11766910552979	9.21295928955078	9.28085136413574	9.28539943695068	9.34097957611084	9.27225971221924	9.25384616851807	9.0928258895874	9.15812110900879	9.34101867675781	9.19195365905762	9.17880439758301	9.2310619354248	9.23499774932861					+	mU1 NR_WT NR			18	18	18	70.2	70.2	70.2	29.26	0	151.84	27247000000	211	0.116503	0.0732088	1.833	0.823517	-0.0175905	-0.235017	0.88536	-0.00570798	-0.150423	0.0150999	-0.0789168	-3.36692	0.860709	0.0118825	0.184717	Q78IK4
8.66432189941406	8.67619037628174	8.59390640258789	8.58624935150146	9.05766582489014	8.98531913757324	8.651123046875	8.70178413391113	8.28214645385742	8.6733341217041	8.09317684173584	8.88767910003662	8.86326313018799	8.75693225860596	8.51261806488037									14	14	14	70.3	70.3	70.3	19.157	0	89.112	8084000000	130	0.079765	0.218806	2.10643	0.111821	-0.280615	-1.92769	0.20897	0.124956	1.40731	0.505675	-0.0938499	-0.707706	0.0685188	0.405571	2.31453	Q78J03
7.83373975753784	7.8443341255188	8.01123237609863	8.30399513244629	7.66396474838257	7.7124137878418	7.91763162612915	7.8582181930542	7.99276113510132	8.02861213684082	8.62481784820557	7.97990798950195	7.6704683303833	7.96232175827026	7.89600801467896									7	7	7	21.1	21.1	21.1	41.565	0	19.026	1632400000	36	0.143298	-0.210268	-1.68333	0.359153	0.217072	1.00929	0.390053	-0.121149	-0.926248	0.374782	0.0891194	0.958591	0.136945	-0.338221	-1.77002	Q791T5
9.5513277053833	9.51000881195068	9.53938961029053	9.47958946228027	9.48888874053955	9.54434108734131	9.54661655426025	9.63073253631592	9.48036670684814	9.52505779266357	9.30226612091064	9.64326477050781	9.45616817474365	9.70528221130371	9.49455833435059									14	14	14	50.8	50.8	50.8	33.499	0	158.74	50781000000	217	0.366724	0.0325658	0.976072	0.219663	-0.084182	-1.40264	0.407348	0.0547395	0.890775	0.748843	0.0221736	0.335256	0.184862	0.138921	1.53715	Q791V5
9.13116931915283	9.15481948852539	9.01405811309814	9.02391052246094	9.16973304748535	9.25983238220215	8.89842891693115	9.01874160766602	8.42373752593994	8.96640014648438	8.75178718566895	9.00723552703857	8.95605278015137	9.14820194244385	8.86706638336182		+		mU1_WT					17	17	17	92.4	92.4	92.4	17.086	0	211.07	18948000000	232	0.950429	0.00569463	0.0648121	0.0457272	-0.367014	-2.64451	0.257642	-0.0863502	-1.25059	0.389933	-0.0920448	-0.9265	0.118768	0.280664	1.88071	Q7TMF3
7.96975135803223	8.01439476013184	8.41505718231201	8.30790233612061	8.08044624328613	8.02027797698975	8.35975933074951	8.51034355163574	8.12642383575439	8.41140079498291	8.77060127258301	7.96604299545288	8.11263847351074	8.05610370635986	8.08393287658691									11	11	11	34.7	34.7	34.7	51.847	0	74.685	2566600000	46	0.693265	0.0659304	0.414001	0.256518	0.259366	1.2806	0.324367	-0.122097	-1.07337	0.168608	-0.188027	-1.56505	0.0632839	-0.381462	-2.37848	Q7TNG8
9.55280208587646	9.57191848754883	9.75407314300537	9.71235466003418	9.63227462768555	9.63674831390381	9.87145614624023	9.87117576599121	9.4191951751709	9.72128295898438	9.62038612365723	9.73465538024902	9.69037342071533	9.8256139755249	9.71329689025879									38	38	38	41.9	41.9	41.9	99.183	0	323.31	76072000000	502	0.261465	0.105127	1.23943	0.550614	-0.0608323	-0.639548	0.160973	0.0931978	1.59884	0.878055	-0.0119288	-0.160102	0.11962	0.15403	1.87515	Q7TQ48
8.15219688415527	8.33073806762695	8.09300136566162	8.23070430755615	7.81331396102905	8.03893756866455	8.18783092498779	8.23766899108887	8.26035785675049	8.24009990692139	7.6792140007019	7.85732650756836	8.02304649353027	7.98088026046753	8.23736763000488									11	11	11	20.8	20.8	20.8	99.229	0	56.979	2183700000	32	0.26771	-0.132222	-1.2215	0.443717	-0.14177	-0.831224	0.109888	-0.177005	-1.87518	0.730015	-0.0447826	-0.36164	0.85629	-0.0352354	-0.190662	Q7TSQ8
7.12927103042603	7.08983469009399	7.29972505569458	6.75034332275391	6.89733076095581	7.00294256210327	6.73626089096069	6.4695200920105	6.70817708969116	7.12628126144409	7.20866203308105	6.78427982330322	6.15676736831665	6.71502208709717	6.75894546508789			+	mU1 NR_WT					2	2	2	12	12	12	28.062	0.0012165	5.9765	85157000	4	0.125534	-0.29078	-1.77909	0.789583	-0.0529201	-0.281531	0.0494291	-0.46354	-2.45537	NaN	0	NaN	NaN	0	NaN	Q80X85
9.96466541290283	9.87620639801025	9.69338417053223	9.32273578643799	9.84900188446045	9.89999580383301	9.70318794250488	9.75831413269043	9.90903663635254	9.35951328277588	9.48481178283691	9.30911922454834	9.36774730682373	9.64629554748535	9.79550457000732									23	23	23	63	63	63	38.299	0	323.31	94178000000	413	0.574562	0.088377	0.593438	0.578045	-0.129794	-0.594519	0.352033	-0.184581	-1.00874	0.0688881	-0.272958	-2.21269	0.78971	-0.0547872	-0.281356	Q80XN0
8.22295093536377	8.29261016845703	8.28905391693115	8.20035839080811	8.19694995880127	8.19661808013916	8.34137535095215	8.30319595336914	8.55500984191895	8.44304370880127	8.01473045349121	8.3626708984375	8.0056095123291	8.36860275268555	8.49640369415283									3	3	3	27	27	27	16.292	0	43.88	3166100000	36	0.856062	0.00829148	0.189349	0.565661	0.0863513	0.614675	0.616316	0.0570784	0.528202	0.677914	0.0487869	0.436252	0.881041	-0.029273	-0.157464	Q80Y14
7.36533832550049	7.48538064956665	6.90273284912109	7.70654726028442	6.60108280181885	7.17551279067993	6.63517093658447	7.37743377685547	7.86054182052612	7.50181198120117	7.22978830337524	7.29376029968262	7.3930835723877	7.50956535339355	7.61138343811035									8	8	8	13.2	13.2	13.2	87.004	0	17.737	484960000	11	0.156676	-0.4177	-1.61853	0.540109	0.165714	0.657177	0.651576	0.0869484	0.475012	0.0501957	0.504648	2.44404	0.668505	-0.0787659	-0.454523	Q80YD1
7.18963050842285	7.24750661849976	7.26297283172607	7.15974760055542	7.3963737487793	7.29249954223633	7.23550319671631	6.53949356079102	7.2898211479187	7.17690134048462	7.38218355178833	7.25078582763672	6.8779182434082	6.51123428344727	7.06856060028076									2	2	2	10	10	10	23.443	0.0012837	6.9321	199490000	12	0.6324	-0.0989969	-0.503741	0.289013	0.0680043	1.1857	0.122122	-0.28784	-1.79899	0.480447	-0.188843	-0.752095	0.125474	-0.355844	-1.83797	Q80ZS3
7.83695030212402	8.09251022338867	7.87128686904907	7.89403343200684	8.04355907440186	6.58739900588989	7.76477384567261	7.91120576858521	8.57287120819092	7.91090726852417	7.37018251419067	7.82462692260742	7.88264989852905	6.61998462677002	7.95249223709106									8	8	8	27.2	27.2	27.2	36.354	0	41.711	1655700000	12	0.346293	-0.346961	-1.0218	0.929931	0.0276251	0.0924499	0.315267	-0.353757	-1.09561	0.988727	-0.006796	-0.0147271	0.458823	-0.381382	-0.802253	Q811I0
6.42463064193726	7.33255672454834	7.13675212860107	7.15709400177002	6.70090055465698	7.1622953414917	7.25839757919312	6.6126012802124	7.35957002639771	7.21521425247192	7.62995958328247	7.19484329223633	6.76712846755981	7.30031299591064	7.25519990921021									5	5	5	7.2	7.2	7.2	83.725	0	11.794	162800000	13	0.769291	-0.0792097	-0.306901	0.192959	0.388823	1.5038	0.637942	0.116613	0.495391	0.372444	0.195822	0.963633	0.185145	-0.27221	-1.53597	Q811U4;Q80U63
9.08066272735596	9.17254447937012	9.26493549346924	9.14170074462891	8.95034503936768	9.02546977996826	9.1631908416748	9.26832008361816	9.26871871948242	9.19404220581055	9.16055870056152	9.10907173156738	9.05153846740723	9.09725761413574	9.27946186065674									20	19	19	62.4	60.4	60.4	48.994	0	224.13	20922000000	211	0.463286	-0.0631294	-0.783213	0.453736	0.0428123	0.811928	0.644101	-0.0306284	-0.486157	0.720638	0.032501	0.374888	0.308893	-0.0734408	-1.13224	Q8BFP9
9.68508720397949	9.73079013824463	9.76576519012451	9.67133903503418	9.82778930664063	9.80475234985352	9.72012615203857	9.75955486297607	9.27362632751465	9.74203395843506	9.6433048248291	9.79282569885254	9.76677703857422	9.78067016601563	9.5734281539917									34	34	34	79.2	79.2	79.2	49.508	0	323.31	79191000000	515	0.0913924	0.0648103	2.00812	0.245992	-0.160257	-1.3137	0.796354	0.0151799	0.269799	0.41889	-0.0496304	-0.86773	0.247926	0.175437	1.30752	Q8BFR5
8.01102066040039	7.78697156906128	7.97855949401855	8.01072406768799	7.74968242645264	7.99483156204224	7.87542581558228	8.05743789672852	8.07368183135986	7.9747052192688	7.90676593780518	7.89962339401245	7.7301197052002	8.18406677246094	8.05014801025391									6	6	6	10	10	10	72.241	0	16.691	1350600000	30	0.762118	-0.0274745	-0.316815	0.634106	0.038232	0.506405	0.869254	0.0191705	0.171785	0.708806	0.046645	0.391711	0.882498	-0.0190615	-0.155516	Q8BG51
7.67186689376831	7.64512729644775	7.52301788330078	7.48784494400024	7.7421669960022	7.72569131851196	7.54838943481445	6.64365482330322	7.75600433349609	7.01447868347168	7.73187494277954	7.46688222885132	7.46768188476563	7.56473684310913	7.62954187393188									3	3	3	6.7	6.7	6.7	48.219	0.0013141	7.5859	565250000	22	0.551378	-0.166989	-0.63088	0.715493	-0.0811783	-0.38583	0.439557	-0.0497535	-0.827616	0.672366	0.117235	0.444353	0.886298	0.0314247	0.15044	Q8BGA9
8.74061489105225	8.72418594360352	8.85386848449707	8.86175537109375	8.97595500946045	8.83677291870117	8.92443943023682	8.98576736450195	8.93109703063965	8.79104423522949	8.97618007659912	9.01506614685059	9.01422595977783	9.10315322875977	8.94896984100342	+		+	mU1 NR_WT;WT NR_WT					16	16	16	51.5	51.5	51.5	40.528	0	79.03	12105000000	140	0.0346431	0.135628	2.71999	0.161158	0.104334	1.64371	0.00342967	0.225248	4.6705	0.102286	0.0896201	1.92687	0.0991469	0.120913	2.02176	Q8BGC4
9.86309051513672	9.76168727874756	9.74119091033936	9.67446613311768	9.73119354248047	9.8561544418335	9.81493282318115	9.88507270812988	9.70553874969482	9.74779987335205	9.68850898742676	9.80699348449707	9.6826868057251	9.8443775177002	9.77528285980225									34	34	34	67.8	67.8	67.8	51.863	0	323.31	87004000000	489	0.275272	0.0617297	1.20026	0.384955	-0.0461595	-0.951697	0.752389	0.0172265	0.330317	0.390656	-0.0445032	-0.924992	0.204643	0.063386	1.45799	Q8BGH2
7.7893762588501	7.68619823455811	7.84363126754761	7.98989009857178	7.60310125350952	7.73220062255859	7.91071510314941	7.80443954467773	7.83550024032593	7.89671897888184	7.96883773803711	7.68995666503906	7.74186038970947	7.8886399269104	7.91942834854126									6	6	6	17.8	17.8	17.8	37.963	0	24.475	954910000	38	0.501395	-0.0646598	-0.715129	0.411085	0.0730784	0.896464	0.844149	-0.0173026	-0.205269	0.598742	0.0473572	0.555338	0.272683	-0.090381	-1.23212	Q8BGP6
7.38035583496094	7.66736888885498	7.76694059371948	7.60268926620483	7.15558862686157	7.70125722885132	7.66688299179077	7.72001028060913	8.00915336608887	7.68912220001221	7.45523309707642	7.34906387329102	7.57909727096558	7.37516975402832	7.59414958953857									6	6	6	17.4	17.4	17.4	53.961	0	13.616	695220000	14	0.79327	-0.0434039	-0.274004	0.523735	0.113498	0.685115	0.260637	-0.129969	-1.24184	0.585794	-0.0865647	-0.575625	0.176675	-0.243466	-1.57236	Q8BGV0
7.79754447937012	7.62560033798218	7.50030517578125	7.61401081085205	7.53057098388672	7.80278730392456	7.66703224182129	7.39464426040649	8.21039867401123	7.62069797515869	7.60169553756714	7.70601749420166	7.77309131622314	7.79876089096069	7.77792692184448									10	10	10	59	59	59	29.415	0	29.887	1011800000	23	0.75089	-0.0356065	-0.332404	0.377084	0.176566	0.968924	0.0913112	0.129584	2.00876	0.116485	0.16519	1.83311	0.791971	-0.0469816	-0.278236	Q8BGX2
8.68121433258057	8.76389217376709	8.74971294403076	8.78268051147461	8.77889633178711	8.79831886291504	8.7482271194458	8.72931861877441	8.82678031921387	8.74516105651855	8.8923168182373	8.81005764007568	8.74685955047607	8.86652946472168	8.96730422973633									7	7	7	20.5	20.5	20.5	31.599	0	51.004	10448000000	85	0.500518	0.0193152	0.716655	0.141695	0.0770444	1.74355	0.0927898	0.103313	1.99717	0.138915	0.0839975	1.70584	0.706233	0.0262683	0.399189	Q8BGY7
6.2225866317749	7.06131362915039	6.02518272399902	6.6967830657959	7.15815401077271	6.99768590927124	5.9800124168396	6.30779552459717	9.5383472442627	6.40250205993652	7.16770696640015	6.38327646255493	6.1325798034668	6.12574148178101	8.76268577575684									27	27	27	53.1	53.1	53.1	70.527	0	170.99	5819600000	48	0.774168	0.109445	0.300181	0.210589	1.20139	1.43563	0.62624	0.349604	0.51307	0.742701	0.240159	0.343833	0.471506	-0.851781	-0.778473	Q8BH04;Q9Z2V4
7.10747146606445	7.21112060546875	7.61140441894531	7.20153379440308	6.9136381149292	7.20027685165405	7.57053136825562	7.595055103302	6.56268787384033	7.58729553222656	7.17789602279663	7.03084230422974	7.04590940475464	6.26402187347412	6.85099744796753									2	2	2	4.1	4.1	4.1	83.099	0.0012255	6.1399	258770000	7	0.857636	0.0369928	0.187251	0.565338	-0.173589	-0.615205	0.0648328	-0.48494	-2.2568	0.0773627	-0.521933	-2.12856	0.389259	-0.31135	-0.942398	Q8BH55
9.88816833496094	9.92035293579102	10.0109777450562	9.95668697357178	9.90111446380615	9.93434143066406	10.0533475875854	10.0423784255981	10.1133413314819	9.99038314819336	9.97517013549805	10.0090684890747	10.0181589126587	10.0727643966675	10.020733833313			+	mU1 NR_WT					47	47	40	68.2	68.2	61.6	74.569	0	323.31	144540000000	686	0.435937	0.038749	0.83454	0.147731	0.0822517	1.71119	0.0284638	0.0861349	2.86901	0.290287	0.0473859	1.15955	0.927117	0.0038832	0.096176	Q8BH59
6.46804857254028	6.75153684616089	7.67373037338257	7.672532081604	6.99434900283813	6.81123924255371	7.66966104507446	7.70949029922485	7.64450740814209	6.82463598251343	7.77937793731689	6.79189968109131	7.77185916900635	6.559410572052	6.73494529724121									5	5	4	11.6	11.6	9.6	61.174	0	13.784	524160000	9	0.703938	0.154723	0.398668	0.564869	0.274712	0.615973	0.684912	-0.176933	-0.426079	0.389544	-0.331656	-0.927311	0.319543	-0.451645	-1.10483	Q8BH64
8.693190574646	8.74277973175049	8.99425601959229	8.75274753570557	8.78831005096436	8.71974563598633	8.78413963317871	8.89688968658447	8.85316848754883	9.02275848388672	8.67627239227295	8.8083667755127	8.61971950531006	8.80829906463623	8.76621246337891									15	15	15	39.4	39.4	39.4	66.365	0	151.58	10450000000	129	0.984772	0.00152779	0.019895	0.654449	0.0549897	0.475543	0.597598	-0.045094	-0.557121	0.451405	-0.0466218	-0.805237	0.358608	-0.100084	-1.01055	Q8BH86
9.50430774688721	9.55629062652588	9.49815845489502	9.54687595367432	9.5712890625	9.53028964996338	9.54292488098145	9.42188358306885	9.73459148406982	9.57976055145264	9.3965482711792	9.58327770233154	9.51722240447998	9.65143299102783	9.47899913787842									18	18	18	61.7	61.7	61.7	31.474	0	311.83	55814000000	261	0.793627	-0.0098114	-0.273518	0.621904	0.0438919	0.525181	0.470635	0.0313249	0.769791	0.442954	0.0411363	0.821155	0.89806	-0.012567	-0.134758	Q8BH95
7.70441627502441	7.6786093711853	7.40901947021484	7.89970541000366	7.9303731918335	7.76581764221191	7.4889030456543	7.92736530303955	7.76941442489624	7.64781332015991	7.17985868453979	7.99829435348511	7.72165393829346	7.90370845794678	7.80820417404175									7	7	7	31.6	31.6	31.6	26.476	0	22.573	876500000	34	0.494758	0.105177	0.726726	0.496867	-0.140575	-0.732275	0.165596	0.185028	1.5782	0.529702	0.0798504	0.666783	0.107331	0.325603	1.95969	Q8BHC4
8.15806102752686	8.10775279998779	8.25743865966797	7.80437803268433	7.82738208770752	7.91678524017334	8.03314208984375	8.086181640625	8.31181716918945	8.00216579437256	7.44954299926758	8.15588188171387	7.99389886856079	7.87547206878662	8.30362796783447									5	5	5	18.9	18.9	18.9	32.985	0	23.21	1931800000	37	0.346498	-0.116035	-1.02133	0.533584	-0.160732	-0.668241	0.99823	0.000312567	0.00231217	0.331488	0.116347	1.05632	0.52909	0.161045	0.675914	Q8BHE8
7.62756061553955	7.77779626846313	7.87711763381958	7.84392404556274	6.8667254447937	6.75416946411133	7.73979377746582	7.88471603393555	7.60087490081787	7.79056644439697	7.61456394195557	6.62710809707642	7.75333786010742	7.5070595741272	7.8715672492981									4	4	4	7.1	7.1	7.1	106.91	0	16.454	735260000	11	0.164216	-0.470248	-1.5843	0.232042	-0.112931	-1.35965	0.278181	-0.341831	-1.19223	0.762036	0.128417	0.316928	0.526882	-0.2289	-0.679699	Q8BHN3
9.11180019378662	9.09039878845215	9.17301177978516	9.08421897888184	9.21383666992188	9.2230281829834	9.15667057037354	9.16007804870605	9.43975925445557	9.13874435424805	9.18081378936768	9.24699115753174	9.13817596435547	9.21090698242188	9.30937480926514	+		+	mU1 NR_WT;WT NR_WT					38	38	38	45.8	45.8	45.8	112.8	0	277.92	23920000000	321	0.0332943	0.0735459	2.74994	0.153874	0.138248	1.67958	0.0349348	0.111505	2.71368	0.376794	0.0379589	0.954271	0.776818	-0.0267436	-0.299209	Q8BIJ6
7.34641170501709	7.29159069061279	7.29143524169922	7.30676794052124	7.04592847824097	7.11400556564331	6.91899967193604	6.86613845825195	7.49897193908691	7.20085048675537	7.70675706863403	6.92458915710449	6.39134407043457	6.93517446517944	7.28185129165649	+			WT NR_WT					4	4	4	7.5	7.5	7.5	74.101	0.001321	7.7177	258650000	8	0.0014699	-0.322783	-5.53239	0.253178	0.159808	1.29097	0.0601583	-0.425812	-2.31134	0.61152	-0.103028	-0.535563	0.0659736	-0.58562	-2.34494	Q8BIP0
7.63155555725098	7.64277124404907	7.66724729537964	7.3265814781189	7.18207216262817	6.73328542709351	7.66221952438354	7.47398281097412	8.17423439025879	7.46896743774414	7.51987409591675	7.68046236038208	7.45035696029663	7.4102201461792	7.93507385253906									3	3	3	9.2	9.2	9.2	45.852	0	10.013	701090000	24	0.211895	-0.304149	-1.39701	0.501202	0.153986	0.724549	0.7328	0.0519894	0.35772	0.181568	0.356138	1.51088	0.685954	-0.101997	-0.428743	Q8BJ03
6.7411150932312	6.13216590881348	7.01304864883423	6.78001165390015	6.62012672424316	6.95956325531006	6.72216510772705	6.63381004333496	6.75849628448486	6.86372709274292	7.60085010528564	6.75788688659668	6.9740138053894	6.81845664978027	6.72214508056641									2	2	2	3.6	3.6	3.6	81.604	0.0044053	3.9311	89615000	6	NaN	0	NaN	0.250801	0.407773	1.29842	0.468877	0.15154	0.772987	0.415267	0.0842093	0.874912	0.318329	-0.256232	-1.10791	Q8BJS4
7.93940448760986	7.9554328918457	8.03977108001709	7.98278665542603	7.92313528060913	7.769362449646	7.96675634384155	8.06468296051025	6.53300857543945	8.11919021606445	7.75265979766846	7.88128185272217	7.74252080917358	7.85928249359131	7.86794471740723			+	mU1 NR_WT					6	6	6	22.5	22.5	22.5	35.975	0	23.719	1177100000	34	0.486864	-0.0483645	-0.740656	0.259542	-0.511063	-1.27133	0.0108503	-0.141591	-3.63881	0.227321	-0.0932268	-1.34471	0.401234	0.369471	0.91695	Q8BJZ4
7.92378282546997	7.90654516220093	8.09261512756348	8.16130828857422	8.24477195739746	8.22677993774414	8.09565734863281	8.11045455932617	8.15833187103271	8.12133026123047	8.11233711242676	8.2306022644043	8.13052654266357	8.29101371765137	8.21192073822021			+	mU1 NR_WT					3	3	3	18.4	18.4	18.4	21.311	0	23.588	1991400000	31	0.0909245	0.148353	2.01182	0.205099	0.109604	1.45625	0.0335138	0.194953	2.74498	0.394931	0.0465999	0.916125	0.0913798	0.0853494	2.08585	Q8BK08
8.04410839080811	8.23899936676025	7.96986293792725	6.84734439849854	8.14745998382568	8.11587619781494	8.13744926452637	8.15503215789795	7.65414762496948	7.67465925216675	8.06870555877686	8.09684085845947	8.12596893310547	8.02477264404297	8.00616645812988					+	mU1 NR_WT NR			2	2	2	36.5	36.5	36.5	11.813	0	20.209	1606600000	20	0.291283	0.363876	1.15691	0.952986	0.024092	0.061972	0.396261	0.288358	0.913381	0.0445034	-0.0755172	-2.53293	0.0749351	0.264266	2.24297	Q8BK30
7.89321231842041	7.8946647644043	7.97926616668701	7.95553874969482	8.01258373260498	7.91618537902832	7.84489965438843	8.10859870910645	7.93884992599487	7.91051244735718	7.72100067138672	7.90009927749634	7.68927335739136	8.03273963928223	7.9255542755127									8	8	8	24.4	24.4	24.4	43.452	0	28.792	1309400000	25	0.539934	0.0398964	0.649722	0.291939	-0.0738828	-1.17763	0.581357	-0.0437539	-0.582637	0.398259	-0.0836502	-0.90927	0.780613	0.030129	0.293943	Q8BKY8
9.16705131530762	9.23286914825439	9.21913909912109	9.14680957794189	9.25302314758301	9.13744926452637	9.30805206298828	9.26981639862061	9.30094337463379	9.24499416351318	9.0795431137085	9.31804275512695	9.21365070343018	9.36533832550049	9.27639293670654			+	mU1 NR_WT					17	17	17	40.3	40.3	40.3	53.998	0	313.88	26755000000	249	0.274431	0.0506179	1.2026	0.790319	0.0170263	0.280514	0.0371287	0.101889	2.66794	0.334226	0.051271	1.04984	0.263586	0.0848626	1.25907	Q8BKZ9
8.62056255340576	8.57397365570068	8.82599067687988	8.73772525787354	8.71969604492188	8.62855243682861	8.8726921081543	8.85374641418457	8.73415946960449	8.8583927154541	9.4773530960083	8.80226039886475	8.6919116973877	8.78237915039063	8.88716697692871									19	19	19	46.8	46.8	46.8	45.739	0	113.12	8928300000	205	0.367624	0.0791087	0.974105	0.162438	0.333739	1.63757	0.19617	0.101367	1.45402	0.762366	0.0222578	0.316471	0.293536	-0.232372	-1.17326	Q8BLF1
9.00578117370605	9.07206630706787	9.04418659210205	9.22188377380371	8.7624683380127	8.59142112731934	9.06107521057129	9.11968421936035	9.24501895904541	9.19537353515625	9.89330673217773	8.85000896453857	8.8510627746582	8.64534378051758	9.14724349975586									25	25	25	65.4	65.4	65.4	67.098	0	288.23	20834000000	219	0.180648	-0.202317	-1.5146	0.127229	0.358587	1.82718	0.110526	-0.212565	-1.871	0.951647	-0.0102475	-0.0632166	0.0515107	-0.571152	-2.54609	Q8BMF3
10.2681093215942	10.3302717208862	10.4057559967041	10.2855577468872	10.1500806808472	10.1795806884766	10.3814401626587	10.3908472061157	10.4934301376343	10.4307203292847	10.3112239837646	10.2571268081665	10.1216583251953	10.33043384552	10.4941549301147									35	35	35	51.9	51.9	51.9	67.941	0	323.31	346950000000	798	0.534029	-0.0469365	-0.659543	0.181565	0.0893678	1.55114	0.804599	-0.0215802	-0.258583	0.809626	0.0253563	0.251763	0.326893	-0.110948	-1.08637	Q8BMF4
6.60498189926147	6.80950403213501	7.0518856048584	6.55398321151733	7.00065660476685	6.42749691009521	7.12007999420166	7.09530878067017	6.4686918258667	6.99288892745972	7.87427568435669	6.46570873260498	6.96945905685425	7.07141828536987	6.56637859344482									2	2	2	9.8	9.8	9.8	35.048	0.0023753	5.5737	93843000	8	0.462698	0.155797	0.784294	0.377158	0.356863	0.96876	0.946154	0.0131525	0.0704117	0.541876	-0.142644	-0.646507	0.413448	-0.343711	-0.891607	Q8BMG8
11.0468854904175	11.032377243042	10.9183187484741	10.8403882980347	10.6809968948364	10.8600263595581	10.9077548980713	10.9442262649536	11.0191993713379	10.9047584533691	10.7640943527222	10.8591804504395	10.755729675293	10.7967758178711	10.9140577316284									86	86	86	86.2	86.2	86.2	82.669	0	323.31	1330600000000	2421	0.194671	-0.111241	-1.45967	0.487324	-0.0634751	-0.749456	0.0771729	-0.128057	-2.13034	0.812778	-0.0168152	-0.247493	0.423868	-0.0645815	-0.870448	Q8BMS1
7.95299577713013	8.01355361938477	8.13184356689453	7.8803563117981	7.93809938430786	7.93352270126343	8.01292133331299	8.07997703552246	7.69154119491577	8.04750823974609	7.20206260681152	7.98058938980103	7.92330121994019	8.03698825836182	7.94225597381592									3	3	3	13.2	13.2	13.2	40.956	0	19.818	1401700000	15	0.957185	-0.00355721	-0.0559669	0.165982	-0.34765	-1.62082	0.698583	-0.0239036	-0.406348	0.651798	-0.0203464	-0.474682	0.178896	0.323746	1.56265	Q8BMS4
7.19212102890015	7.15439367294312	7.104248046875	7.35168027877808	7.13240098953247	6.26141881942749	7.09850549697876	6.63816738128662	7.8691086769104	7.31388807296753	7.72562599182129	7.34153366088867	7.19373655319214	7.26693677902222	7.45252227783203		+		mU1_WT	+	mU1 NR_WT NR			4	4	4	9.3	9.3	9.3	47.624	0	8.3693	314780000	8	0.0984757	-0.417988	-1.95426	0.0358873	0.435597	2.84849	0.1918	0.113072	1.47061	0.0479539	0.531059	2.47771	0.0900909	-0.322525	-2.09704	Q8BP40
7.62256622314453	7.70163726806641	7.53119802474976	7.61275196075439	7.90174722671509	7.8382887840271	7.63445711135864	7.56212615966797	7.76817893981934	7.67096900939941	7.32706165313721	7.80784606933594	7.8583869934082	8.04524517059326	7.57605314254761									4	4	4	13.8	13.8	13.8	34.067	0.0013298	7.9401	803460000	20	0.231817	0.117116	1.33007	0.821902	-0.0283018	-0.237216	0.0929789	0.204844	1.9957	0.512117	0.087728	0.69661	0.204736	0.233146	1.45763	Q8BPE4
7.62110376358032	7.49796581268311	7.64231586456299	7.59977388381958	6.61728239059448	7.71996068954468	7.55046081542969	7.76702976226807	8.16250419616699	7.58349370956421	8.17146301269531	7.55880451202393	7.71895837783813	7.59484529495239	7.78277349472046									6	6	6	22.7	22.7	22.7	45.926	0	23.719	714300000	17	0.539329	-0.176606	-0.650725	0.0708721	0.382197	2.28748	0.276129	0.0735556	1.19789	0.39735	0.250162	0.911138	0.136567	-0.308642	-1.77216	Q8BSF4
7.38715839385986	7.36042308807373	7.33140707015991	7.47603416442871	7.29688453674316	7.39682674407959	7.47243452072144	7.28366279602051	7.54733180999756	7.53183650970459	7.88877439498901	7.45325708389282	7.34010696411133	7.47974824905396	7.25466871261597									2	2	2	27.5	27.5	27.5	9.2858	0.0012376	6.1775	360870000	19	0.645792	-0.0263035	-0.48363	0.0504147	0.267225	2.56378	0.914421	-0.00681043	-0.112074	0.785684	0.0194931	0.284374	0.0634719	-0.274036	-2.37609	Q8BTE5
7.2569580078125	7.22128391265869	7.6701717376709	7.29998636245728	7.30537271499634	7.3340916633606	7.42652750015259	7.47268342971802	7.33455419540405	7.54613542556763	7.46168375015259	7.2665376663208	7.26853132247925	7.49089908599854	7.678053855896									3	3	3	8.1	8.1	8.1	51.611	0.0012788	6.853	363070000	10	0.845676	0.0225688	0.203225	0.550178	0.0853578	0.640275	0.672009	0.0639055	0.444875	0.711517	0.0413367	0.387845	0.873567	-0.0214523	-0.167465	Q8BTJ4
7.91024541854858	7.97347402572632	7.77157258987427	7.87920475006104	7.75849533081055	7.77988481521606	7.68381214141846	7.76206302642822	7.73175001144409	7.61095809936523	7.7512583732605	6.5955023765564	7.96623086929321	7.59943532943726	7.65426301956177	+	+		mU1_WT;WT NR_WT					17	17	15	9	9	8.6	281.22	0	99.698	872000000	39	0.0269254	-0.13756	-2.91157	0.0302401	-0.185635	-2.99594	0.202324	-0.429766	-1.43122	0.364771	-0.292206	-0.980356	0.520758	-0.244131	-0.690256	Q8BTM8
8.16888046264648	8.12775230407715	8.3612174987793	8.34929656982422	7.8858585357666	7.9677209854126	8.05549335479736	8.15256309509277	8.27341842651367	8.35310840606689	8.56950283050537	8.18318462371826	8.1540584564209	7.70726346969604	8.07834815979004	+			WT NR_WT					8	8	8	34.8	34.8	34.8	36.867	0	55.658	2016900000	47	0.0296245	-0.236378	-2.83852	0.212643	0.14689	1.42804	0.128695	-0.221073	-1.76113	0.905881	0.0153047	0.12332	0.0574647	-0.367963	-2.45665	Q8BTX9
7.87249994277954	7.96732807159424	7.79483652114868	6.79883718490601	8.16784858703613	7.82543897628784	7.97441482543945	7.88610124588013	6.8773136138916	7.5900502204895	7.51001596450806	7.90225315093994	7.71184110641479	7.78497362136841	7.91032552719116									6	6	6	37.4	37.4	37.4	23.805	0	16.557	949320000	27	0.255055	0.355075	1.25823	0.483041	-0.282582	-0.757244	0.458301	0.218973	0.792405	0.176119	-0.136103	-1.5332	0.0514916	0.501555	2.54639	Q8BU88
7.29616022109985	7.22873401641846	7.26641988754272	6.33270978927612	7.21816778182983	6.97472143173218	7.2327675819397	7.32132911682129	7.17983913421631	7.18627786636353	7.42416191101074	7.18707036972046	6.79339981079102	6.42815399169922	7.07871055603027									2	2	2	11.6	11.6	11.6	31.791	0.0012821	6.9049	214620000	8	0.547996	0.15574	0.636421	0.450329	0.23242	0.818454	0.600858	-0.159172	-0.552047	0.139868	-0.314913	-1.70089	0.123514	-0.391593	-1.85022	Q8BUY5
7.26677227020264	7.40883350372314	7.44954013824463	7.45247650146484	7.76265621185303	7.71936464309692	7.35306930541992	7.50114154815674	7.95879316329956	7.44291877746582	8.08151340484619	7.42435884475708	7.52168703079224	7.80298566818237	7.49855852127075									4	4	4	28.2	28.2	28.2	25.57	0	31.65	551450000	15	0.122103	0.189652	1.79911	0.0528902	0.433336	2.5244	0.124401	0.167492	1.78564	0.867068	-0.0221604	-0.174691	0.222479	-0.265844	-1.39266	Q8BVI4
8.84104633331299	9.0197811126709	8.93106651306152	8.89228916168213	9.10281085968018	9.11106109619141	8.84543895721436	8.90222549438477	8.8514232635498	8.9264965057373	8.64586448669434	8.87991523742676	9.05948734283447	8.98791599273682	8.73716068267822									25	25	25	57.5	57.5	57.5	58.557	0	130.59	13461000000	189	0.408408	0.0693383	0.888638	0.231915	-0.113118	-1.36008	0.952693	-0.00492597	-0.0618482	0.47687	-0.0742643	-0.758517	0.365241	0.108192	0.995404	Q8BW75
9.17926406860352	9.16476917266846	9.21013164520264	9.1397533416748	9.27232933044434	9.22042179107666	9.28470134735107	9.2749195098877	9.12424373626709	9.22411823272705	9.25664520263672	9.30573844909668	9.19231605529785	9.27717399597168	9.20493316650391	+			WT NR_WT					29	29	29	63.1	63.1	63.1	55.968	0	323.31	25255000000	283	0.00484584	0.0896134	4.34557	0.487063	0.0281895	0.74993	0.061755	0.0715609	2.29223	0.582911	-0.0180526	-0.580177	0.394872	0.0433714	0.930393	Q8BWF0
8.84867572784424	8.84165954589844	8.84172248840332	8.86304950714111	8.44362258911133	8.65711307525635	8.99743843078613	8.88890933990479	9.25582695007324	8.89280700683594	9.07845687866211	8.57376480102539	8.72486591339111	8.78535079956055	9.11287307739258		+		mU1_WT					15	15	15	60.4	60.4	60.4	43.323	0	199.45	12455000000	126	0.440725	-0.102006	-0.825391	0.0493158	0.22692	2.58194	0.678245	-0.0495632	-0.43577	0.765221	0.0524428	0.312521	0.145588	-0.276483	-1.72252	Q8BWM0
10.8449239730835	10.7428903579712	10.8251466751099	10.6233530044556	11.0103425979614	11.0089406967163	10.9388799667358	10.9630365371704	10.6336708068848	10.8017263412476	10.4989309310913	10.9071044921875	10.9544496536255	10.8676443099976	10.7501382827759	+			WT NR_WT					56	56	56	99	99	99	41.829	0	323.31	1146100000000	1767	0.00603381	0.221221	4.14662	0.280239	-0.114302	-1.21034	0.147601	0.110756	1.66188	0.05741	-0.110466	-2.34551	0.0538235	0.225058	2.51007	Q8BWT1
6.99075603485107	6.64847278594971	7.28305244445801	7.21494960784912	7.05644750595093	7.02934312820435	7.29894018173218	7.3768138885498	7.33129215240479	7.36576890945435	7.3978271484375	7.16342973709106	6.61216354370117	7.45438766479492	7.21992492675781									2	2	2	3.1	3.1	3.1	80.109	0.0012121	5.833	217420000	16	0.386738	0.156078	0.933185	0.109238	0.330655	1.94593	0.74396	0.0781687	0.342073	0.707951	-0.0779097	-0.392931	0.286191	-0.252486	-1.19355	Q8BY89
7.88486337661743	8.20892524719238	8.14860248565674	8.35260677337646	6.7377815246582	7.58315324783325	8.08546924591064	7.95485496520996	8.39714050292969	8.05530166625977	8.40934085845947	8.12645626068115	7.69104623794556	7.69516611099243	8.17043781280518									5	5	5	20.8	20.8	20.8	52.597	0	28.46	1386000000	19	0.130407	-0.558435	-1.75157	0.401248	0.138512	0.91692	0.214114	-0.227973	-1.38927	0.356391	0.330462	0.99894	0.10252	-0.366484	-1.99555	Q8BYL4
7.88749933242798	7.94962406158447	7.91839218139648	7.82902050018311	8.14844799041748	8.16292285919189	7.98077583312988	8.0167407989502	7.90622711181641	7.97564315795898	7.4846363067627	8.13126564025879	8.01363754272461	7.97834491729736	7.9411187171936	+		+	mU1 NR_WT;WT NR_WT					8	8	8	19.2	19.2	19.2	61.271	0	48.669	1434900000	48	0.0138527	0.181088	3.43695	0.452962	-0.107298	-0.813407	0.0483101	0.119958	2.47225	0.360116	-0.0611302	-0.990637	0.158739	0.227256	1.65544	Q8BYM8
7.27874851226807	6.98858261108398	7.51854038238525	6.38450479507446	7.57814598083496	7.61164903640747	6.66598987579346	6.52190208435059	6.9025731086731	6.28593111038208	7.31273460388184	7.63567447662354	7.58567523956299	6.86280107498169	7.57665205001831									3	3	3	12.5	12.5	12.5	37.131	0.0023895	5.6351	546480000	10	0.895926	0.0518277	0.136454	0.608322	-0.208848	-0.546333	0.269738	0.372607	1.21575	0.387331	0.320779	0.931941	0.140002	0.581454	1.75288	Q8C0L0
8.31190204620361	8.29256629943848	8.41912937164307	8.29800128936768	8.56198310852051	8.62362098693848	8.4703369140625	8.44112968444824	8.01861763000488	8.41386985778809	8.57020473480225	8.54434108734131	8.58044624328613	8.57196521759033	8.46035671234131	+		+	mU1 NR_WT;WT NR_WT					16	16	16	19.6	19.6	19.6	117.3	0	69.787	4049100000	114	0.0093388	0.193868	3.76542	0.979491	0.00383099	0.0270179	0.00210812	0.208878	5.15346	0.774636	0.0150096	0.299537	0.205908	0.205047	1.45318	Q8C129
7.0083794593811	6.85986757278442	6.5541467666626	6.51433610916138	6.76970100402832	5.73824977874756	7.48883247375488	7.15084505081177	6.65554475784302	6.91335964202881	7.44988918304443	7.64719724655151	7.40781545639038	7.89210557937622	6.63961124420166									2	2	2	6	6	6	55.662	0.0023502	5.2705	191770000	6	0.898835	0.0527246	0.132613	NaN	0	NaN	0.0666906	0.6625	2.23624	0.238638	0.609775	1.30835	0.346352	0.390418	1.03915	Q8C165
7.50707292556763	7.7016716003418	8.03514957427979	7.63547372817993	7.32966232299805	7.51699781417847	7.64322566986084	7.72750043869019	7.66243648529053	7.87681245803833	7.23568868637085	7.41405344009399	7.55431938171387	7.46200847625732	7.6962251663208									5	5	5	10.3	10.3	10.3	72.462	0	17.337	689680000	14	0.288001	-0.165495	-1.16563	0.561758	-0.128196	-0.621085	0.193655	-0.18819	-1.46353	0.838266	-0.0226949	-0.213153	0.744187	-0.0599943	-0.344924	Q8C3X4
7.69402551651001	7.86580848693848	7.89321804046631	7.75946378707886	7.78782176971436	7.93433666229248	8.00104141235352	8.07000064849854	7.97062110900879	7.97115993499756	7.78980922698975	8.04080009460449	8.02251052856445	8.0293436050415	8.01506614685059			+	mU1 NR_WT					7	7	7	21.7	21.7	21.7	50.858	0	30.326	1273800000	29	0.104854	0.145171	1.90899	0.209552	0.107401	1.43948	0.00303657	0.223801	4.7884	0.241299	0.07863	1.30002	0.0709839	0.1164	2.28622	Q8C5H8
7.48454189300537	7.51165628433228	7.37872505187988	7.30845785140991	7.5391263961792	7.38540983200073	7.57359075546265	7.52125597000122	7.4353985786438	7.57107973098755	7.08174896240234	7.39853048324585	7.09409856796265	7.44630432128906	7.39052867889404									3	3	3	10	10	10	53.076	0	12.425	407680000	14	0.22871	0.0840005	1.34016	0.683068	-0.0581028	-0.432983	0.37907	-0.0884798	-0.949408	0.104838	-0.17248	-1.9091	0.852068	-0.0303769	-0.196349	Q8C5Q4
7.68435144424438	7.6363673210144	7.7821569442749	7.50700521469116	7.72952938079834	7.80511331558228	7.6517915725708	7.81464052200317	7.43448925018311	7.70862483978271	7.27164649963379	7.71010065078735	7.49005699157715	7.51454782485962	7.45453977584839					+	mU1 NR_WT NR			5	5	5	16.9	16.9	16.9	45.932	0	18.525	683170000	16	0.204077	0.0977985	1.42485	0.211614	-0.180883	-1.43183	0.222406	-0.110159	-1.36102	0.0231875	-0.207957	-3.02699	0.599876	0.0707244	0.559626	Q8C7H1
7.56745004653931	7.57202291488647	7.63686895370483	7.56534004211426	7.01008796691895	7.16967439651489	7.77841901779175	8.02209854125977	7.54488611221313	7.49078702926636	7.47281408309937	7.04020643234253	7.28652381896973	7.56506824493408	7.58115291595459		+		mU1_WT					2	2	2	3.5	3.5	3.5	111.6	0	9.7305	585910000	14	0.721709	-0.0903505	-0.37337	0.0290719	-0.0825914	-3.03029	0.145091	-0.217183	-1.67432	0.659159	-0.126832	-0.463772	0.419861	-0.134591	-0.878537	Q8C7X2
8.64697170257568	8.72924613952637	8.76120567321777	8.75661373138428	9.10301685333252	8.99999141693115	8.88201236724854	8.89034271240234	8.68098735809326	8.84365653991699	8.51047801971436	9.03112602233887	9.03241729736328	8.79705238342285	8.84648513793945	+		+	mU1 NR_WT;WT NR_WT					12	12	12	41.1	41.1	41.1	38.399	0	71.531	10235000000	100	0.00573072	0.245332	4.19291	0.623536	-0.0451353	-0.522658	0.0228736	0.203261	3.03759	0.620486	-0.0420706	-0.521827	0.0706382	0.248396	2.29013	Q8CAK1
9.56578922271729	9.57398509979248	9.56872940063477	9.58597946166992	9.64104747772217	9.71214485168457	9.66906547546387	9.58272266387939	9.90715312957764	9.53813362121582	9.59672927856445	9.69656562805176	9.64491081237793	9.75740337371826	9.6788911819458	+		+	mU1 NR_WT;WT NR_WT					64	64	64	64.6	64.6	64.6	83.899	0	323.31	74573000000	723	0.0301772	0.0776243	2.82445	0.315236	0.107051	1.11582	0.00236171	0.120822	5.03792	0.27452	0.0431976	1.20235	0.895608	0.0137707	0.138024	Q8CAQ8
9.08181476593018	9.26867198944092	9.26721858978271	9.14373302459717	9.52854347229004	9.39306640625	9.22222232818604	9.31424617767334	9.32623386383057	9.37661361694336	9.03850078582764	9.43381786346436	9.38699817657471	9.21423435211182	9.34646987915039									66	66	66	40.5	40.5	40.5	213.42	0	323.31	29140000000	379	0.0719228	0.17416	2.1814	0.608397	0.0567565	0.546215	0.0579919	0.15502	2.33813	0.819394	-0.0191395	-0.238549	0.389523	0.098264	0.94183	Q8CC88
7.55091285705566	7.54296207427979	7.71874237060547	7.79505920410156	7.81177616119385	7.82306957244873	7.65575313568115	7.67571401596069	7.76245355606079	7.69511365890503	7.78962993621826	7.78278064727783	7.7109546661377	7.87529277801514	7.8464298248291									4	4	4	12.9	12.9	12.9	36.464	0	9.9425	792450000	27	0.285847	0.0896591	1.1714	0.266586	0.0971466	1.25009	0.0808423	0.151945	2.09673	0.317988	0.0622863	1.08891	0.31579	0.0547988	1.11439	Q8CEE7
7.7684531211853	7.83722829818726	7.78077793121338	7.38976812362671	8.06415843963623	8.14254570007324	7.68507862091064	7.85975074768066	7.77243185043335	7.68604612350464	7.61805295944214	8.07040691375732	7.78139638900757	7.90664768218994	7.74170303344727									3	3	3	34.5	34.5	34.5	12.228	0	54.663	1143700000	26	0.144764	0.243827	1.67595	0.988757	-0.00187989	-0.0148093	0.202301	0.180982	1.43131	0.63832	-0.0628449	-0.494823	0.112819	0.182862	1.92076	Q8CEI1
7.93627262115479	7.90609264373779	7.7634129524231	7.88354778289795	8.02489566802979	7.93572378158569	7.98467588424683	8.13049411773682	8.18892860412598	7.95812892913818	7.37375831604004	8.06220626831055	8.11367607116699	7.90827035903931	7.85526466369629	+			WT NR_WT					5	5	5	18.5	18.5	18.5	40.612	0	20.54	1466000000	27	0.0399888	0.146616	2.61245	0.883451	-0.0320596	-0.154243	0.16984	0.112523	1.55973	0.661475	-0.034093	-0.460353	0.532145	0.144582	0.670693	Q8CG76
9.21494960784912	9.20262432098389	9.43469619750977	9.351487159729	9.18418025970459	9.1469030380249	9.38095283508301	9.41239356994629	10.2850399017334	9.37828922271729	9.37075328826904	9.2806921005249	9.21550559997559	9.2165355682373	9.97999382019043									61	61	61	61.6	61.6	61.6	105.84	0	323.31	65148000000	388	0.828441	-0.0198319	-0.226352	0.210217	0.377088	1.43701	0.552717	0.122242	0.628691	0.500154	0.142074	0.71729	0.482632	-0.254846	-0.757992	Q8CGK3
7.48454189300537	7.10896444320679	7.58850717544556	6.62030267715454	6.89779138565063	6.6555871963501	6.61489629745483	6.68190956115723	6.74008417129517	6.763343334198	7.56226634979248	7.46793365478516	7.57741117477417	6.505934715271	7.19879961013794									3	3	3	13.1	13.1	13.1	35.197	0	8.9628	516410000	15	0.0761818	-0.488033	-2.1397	0.625665	-0.178681	-0.519372	0.969301	-0.0130593	-0.040118	0.104947	0.474974	1.90835	0.6679	0.165622	0.455422	Q8CH40
9.51951313018799	9.53233432769775	9.6364278793335	9.5603609085083	9.80291080474854	9.71710395812988	9.70598316192627	9.77712917327881	9.26033401489258	9.6755952835083	9.41732215881348	9.74866104125977	9.7918586730957	9.70134353637695	9.45048046112061	+			WT NR_WT					27	27	27	60.3	60.3	60.3	61.84	0	323.31	63427000000	372	0.00170433	0.188623	5.37461	0.342339	-0.111075	-1.0487	0.219036	0.110927	1.37239	0.368733	-0.0776958	-0.971685	0.163057	0.222002	1.63462	Q8CHT0
7.2569580078125	7.21322536468506	7.09544849395752	6.52512979507446	7.26735925674438	7.31243133544922	7.30081272125244	6.69027280807495	7.06981611251831	7.23065328598022	7.6114649772644	7.05698108673096	7.30778455734253	7.27216672897339	7.2837986946106									2	2	2	4.7	4.7	4.7	63.299	0.001287	6.9559	228060000	16	0.615878	0.120029	0.528873	0.296188	0.281288	1.16604	0.290548	0.207492	1.15886	0.608577	0.0874637	0.540098	0.645708	-0.0737954	-0.488739	Q8CI51
7.45308876037598	7.3422646522522	7.51308441162109	6.61943054199219	7.43383359909058	7.59002780914307	7.49491930007935	7.63701915740967	6.19663572311401	7.46501064300537	7.40714025497437	7.40169334411621	7.37189865112305	6.36105680465698	7.07658290863037									4	4	4	9.3	9.3	9.3	51.842	0	11.071	345670000	12	0.198192	0.306983	1.44646	0.642907	-0.209038	-0.492988	0.594236	-0.179159	-0.562369	0.0958242	-0.486142	-1.97395	0.949529	0.0298791	0.0665375	Q8CI78
7.30431795120239	7.56697940826416	7.66332387924194	7.42479991912842	6.63677883148193	6.36335372924805	7.51693201065063	7.81626129150391	8.84552574157715	7.54751634597778	7.57134103775024	7.11580991744995	7.35957002639771	7.46116828918457	7.4157075881958									11	11	11	30.7	30.7	30.7	58.575	0	69.612	1415700000	21	0.296544	-0.406524	-1.14311	0.236633	0.498272	1.34425	0.217573	-0.151791	-1.37737	0.500234	0.254732	0.71715	0.139353	-0.650064	-1.75648	Q8CIM3
9.14267063140869	9.11554431915283	9.10673427581787	9.06759166717529	9.27524185180664	9.2446231842041	9.18406677246094	9.20763397216797	9.19628715515137	9.10574817657471	9.0218505859375	9.1955394744873	9.158935546875	9.18687152862549	9.16208648681641	+		+	mU1 NR_WT;WT NR_WT					33	33	33	61.6	61.6	61.6	68.721	0	237.84	22273000000	362	0.00328007	0.119756	4.71348	0.997139	-0.000173251	-0.00376865	0.00931898	0.067723	3.76723	0.0563511	-0.0520332	-2.35913	0.179168	0.0678963	1.56147	Q8JZN5
8.55854034423828	8.67522811889648	8.65873622894287	8.62173652648926	8.86398315429688	8.81150817871094	8.71482372283936	8.68948650360107	9.1618766784668	8.6579065322876	8.22734642028809	8.67625427246094	8.70344638824463	8.79287433624268	8.87361145019531	+		+	mU1 NR_WT;WT NR_WT					33	33	31	46.5	46.5	46.1	89.518	0	210.61	9241100000	161	0.0266043	0.14139	2.92078	0.822775	0.0538162	0.236028	0.0425558	0.132986	2.56614	0.894486	-0.00840378	-0.138355	0.746896	0.0791701	0.341098	Q8JZQ2;Q8C8R3
7.78649568557739	8.02391052246094	8.04004859924316	7.91496706008911	6.56033658981323	6.85371398925781	8.15878486633301	7.3290901184082	8.34598159790039	8.17440891265869	7.99588966369629	7.48284482955933	7.70699071884155	7.6485161781311	8.22149276733398									3	3	3	17.6	17.6	17.6	39.136	0	34.354	1381000000	20	0.0896099	-0.715874	-2.02234	0.0886488	0.230738	2.10976	0.339037	-0.176394	-1.03857	0.209414	0.53948	1.40574	0.105971	-0.407132	-1.96966	Q8JZU0
7.72472620010376	7.56676721572876	7.94480848312378	8.07437801361084	7.58325529098511	7.62263870239258	7.6882152557373	7.67678499221802	9.0197811126709	7.6380295753479	7.96735763549805	7.67827224731445	6.8786826133728	7.45827531814575	8.80158233642578									26	26	26	32.7	32.7	32.7	101.59	0	133.64	2778200000	49	0.160812	-0.184946	-1.59957	0.354675	0.380719	1.01963	0.777839	-0.123467	-0.295133	0.883902	0.0614796	0.152354	0.432183	-0.504186	-0.853848	Q8K009;Q8R0Y6
8.92003440856934	8.97179508209229	9.14674758911133	8.96618366241455	9.19722557067871	9.15472793579102	9.01845073699951	9.10913944244385	8.92899417877197	9.08781719207764	8.7289457321167	9.08958721160889	9.02312850952148	9.11637496948242	8.99337005615234									30	30	30	47.3	47.3	47.3	83.549	0	154.1	16815000000	283	0.10805	0.118696	1.88734	0.450419	-0.0859378	-0.818281	0.38022	0.054425	0.946958	0.227046	-0.0642707	-1.34562	0.192405	0.140363	1.50604	Q8K0D5
7.6077446937561	7.86843872070313	7.41765451431274	7.97227239608765	7.23137044906616	7.85681962966919	7.93302631378174	7.98485136032104	6.79403686523438	7.26363611221313	7.85389518737793	6.95924663543701	7.83117866516113	8.03249835968018	6.80060768127441									7	7	7	21	21	21	54.752	0	40.445	718200000	22	0.876502	0.0349894	0.162162	0.222769	-0.412672	-1.39164	0.386612	-0.310645	-0.93345	0.367271	-0.345634	-0.974876	0.828041	0.102027	0.228864	Q8K0E8
8.07689476013184	8.22983551025391	8.07081317901611	8.16637134552002	8.04080009460449	7.95593786239624	7.91959571838379	7.87718105316162	8.53971576690674	8.19506931304932	7.83744716644287	8.1694393157959	7.97616195678711	8.1930685043335	8.18021202087402	+			WT NR_WT	+	mU1 NR_WT NR			9	9	9	38.1	38.1	38.1	32.314	0	31.136	2208000000	49	0.0109031	-0.1876	-3.63475	0.76763	0.0547654	0.312002	0.925317	-0.00625825	-0.0977469	0.0265599	0.181342	2.92206	0.748639	-0.0610236	-0.33864	Q8K0Z7
6.49701499938965	6.92395353317261	7.44799470901489	7.20520448684692	6.63296365737915	6.66697835922241	7.402587890625	7.35978507995605	7.37287521362305	7.4406886100769	7.20774698257446	6.86590957641602	6.96599149703979	6.8380880355835	7.25173568725586							+	mU1 NR_mU1	3	3	3	6.8	6.8	6.8	62.412	0	24.439	212500000	19	0.992282	-0.00296319	-0.010083	0.251627	0.321895	1.29582	0.871053	-0.0381107	-0.169395	0.884324	-0.0351475	-0.151795	0.0354449	-0.360006	-2.85907	Q8K1C0
6.7220458984375	6.78344631195068	7.18960046768188	6.56331396102905	7.74805593490601	7.47623729705811	7.07625389099121	7.01747226715088	7.76683664321899	7.37720775604248	7.53528118133545	7.00056791305542	6.5169792175293	7.205153465271	7.60671424865723		+		mU1_WT					5	5	5	9.3	9.3	9.3	87.38	0	8.8057	308750000	11	0.0563311	0.514903	2.35939	0.00982122	0.745174	4.05043	0.347833	0.267752	1.01828	0.419134	-0.247151	-0.867247	0.154024	-0.477421	-1.67883	Q8K1N1
8.3570384979248	8.50487804412842	8.50558376312256	8.51701068878174	8.50355911254883	8.47181987762451	8.43240833282471	8.46622943878174	8.58317565917969	8.54680156707764	8.45106410980225	8.33051490783691	8.28728675842285	8.48583507537842	8.42005443572998									19	19	19	30.9	30.9	30.9	85.682	0	98.062	4620100000	103	0.950843	-0.00262356	-0.0642705	0.363146	0.055886	1.00016	0.175035	-0.090205	-1.53771	0.111073	-0.0875814	-1.86744	0.0656612	-0.146091	-2.34876	Q8K1R3
8.29349517822266	8.44628810882568	8.33945178985596	8.13529205322266	8.61782836914063	8.49395942687988	8.08159923553467	8.16124820709229	8.47702026367188	8.29708194732666	8.01845073699951	8.07900047302246	8.27943897247314	8.22993755340576	7.97472810745239									10	10	10	34.2	34.2	34.2	35.082	0	57.32	3699900000	117	0.816227	0.035027	0.242828	0.782289	-0.0394475	-0.291619	0.137818	-0.162856	-1.71158	0.225991	-0.197883	-1.34909	0.414931	-0.123408	-0.888571	Q8K1Z0
11.044225692749	10.9295768737793	10.8543062210083	10.8207921981812	11.1588144302368	11.1723108291626	10.9743595123291	11.0224695205688	10.7132387161255	10.8631801605225	10.7178621292114	11.0787830352783	11.1469650268555	11.086217880249	10.9289131164551							+	mU1 NR_mU1	65	65	65	80.7	80.7	80.7	72.585	0	323.31	1426700000000	1810	0.0512479	0.169763	2.42877	0.0945932	-0.147465	-2.05867	0.0719088	0.147995	2.18154	0.758647	-0.0217688	-0.321624	0.00766069	0.295459	4.30751	Q8K2B3
8.76260375976563	8.80004978179932	8.88838195800781	8.69688034057617	8.88302516937256	8.81515884399414	8.77643966674805	8.80929660797119	8.83934593200684	8.81279277801514	8.7938117980957	8.85464000701904	8.78999614715576	8.84272766113281	8.82816982269287									15	15	15	46.5	46.5	46.5	34.134	0	113.07	10154000000	183	0.485871	0.0340011	0.74242	0.584841	0.0283379	0.583571	0.36075	0.0419044	0.98923	0.774863	0.00790334	0.299224	0.52684	0.0135666	0.679772	Q8K2C6
7.26813316345215	7.33559846878052	7.26064348220825	7.36858415603638	7.46998405456543	7.35208606719971	7.19047164916992	7.15800046920776	7.3136773109436	7.29782629013062	7.38306093215942	7.21547889709473	7.13455963134766	7.3437819480896	7.17952299118042									2	2	2	15.2	15.2	15.2	20.059	0.00998	2.7486	268750000	5	0.846809	-0.0156043	-0.20171	0.566834	0.0232817	0.612754	0.134979	-0.089904	-1.72664	0.418491	-0.0742997	-0.868519	0.106326	-0.113186	-1.96704	Q8K2D6
7.89780282974243	7.89105796813965	8.04469680786133	7.8646354675293	7.70022773742676	7.70422792434692	7.90748119354248	8.00898361206055	6.48387384414673	8.06393337249756	7.07388305664063	7.55963134765625	7.75440168380737	7.53991603851318	7.63109874725342			+	mU1 NR_WT					5	5	5	27.6	27.6	27.6	45.029	0	20.637	1003400000	28	0.319286	-0.0943182	-1.08572	0.124253	-0.717318	-1.84558	0.00303049	-0.303286	-4.79036	0.0609828	-0.208968	-2.30141	0.336886	0.414032	1.06183	Q8K2M0
7.45261430740356	7.47439098358154	7.53136396408081	7.23974990844727	7.28721952438354	7.4717755317688	7.24568557739258	7.22868251800537	6.97477197647095	7.45041847229004	7.46609783172607	7.24281454086304	7.08214902877808	7.46550178527832	7.5411491394043									4	4	4	15.9	15.9	15.9	29.725	0	11.84	298280000	15	0.219618	-0.116189	-1.37041	0.447227	-0.127434	-0.824427	0.483567	-0.0916262	-0.74652	0.843041	0.0245628	0.206752	0.852788	0.0358075	0.195378	Q8K2Y7
9.51715660095215	9.5814380645752	9.64744186401367	9.51974964141846	9.29417991638184	9.17376899719238	9.60646724700928	9.5711612701416	9.29589653015137	9.55620574951172	9.15250205993652	9.55314254760742	9.25669384002686	9.46562099456787	9.49306774139404									20	20	20	14.3	14.3	14.3	118.98	0	222.18	46237000000	251	0.208306	-0.155052	-1.40967	0.0793105	-0.231578	-2.19783	0.132506	-0.124315	-1.74002	0.81206	0.0307369	0.248466	0.429547	0.107263	0.859085	Q8K370
8.62784671783447	8.52183055877686	8.53123569488525	8.31939792633057	7.82091045379639	8.27818202972412	8.416090965271	8.31173229217529	8.65921211242676	8.52475929260254	9.02563381195068	7.92317152023315	8.01724243164063	8.25027370452881	8.4761209487915							+	mU1 NR_mU1	5	5	5	23.1	23.1	23.1	24.038	0	73.604	5430200000	73	0.0929586	-0.293349	-1.99586	0.168249	0.236457	1.61029	0.0545173	-0.333376	-2.38336	0.832327	-0.0400268	-0.221126	0.031708	-0.569833	-2.95482	Q8K3J1
8.98263740539551	8.92514228820801	9.04952812194824	9.02317047119141	8.95103168487549	8.92257976531982	8.98160552978516	9.05215549468994	9.00667953491211	9.04956722259521	9.06137752532959	9.06186676025391	8.95764541625977	8.98936557769775	9.10863304138184									39	39	39	51.1	51.1	51.1	117.37	0	323.31	15717000000	313	0.654598	-0.0182765	-0.470524	0.262522	0.0440885	1.26228	0.462583	0.0342581	0.784505	0.279008	0.0525346	1.18996	0.827648	-0.0098304	-0.229398	Q8K411
9.22047424316406	9.26944255828857	9.40979766845703	9.03877925872803	8.87241268157959	8.84525299072266	9.33057594299316	9.39436435699463	9.24551296234131	9.29543495178223	9.19950866699219	9.11055564880371	9.01372146606445	9.17163848876953	9.30813694000244									15	15	15	72.6	72.6	72.6	33.56	0	161.04	26989000000	186	0.480742	-0.123972	-0.751567	0.90139	0.0121954	0.130325	0.42783	-0.0836103	-0.850204	0.807556	0.0403616	0.254569	0.265993	-0.0958057	-1.25186	Q8K4F5
8.8739652633667	8.75282382965088	8.90038871765137	8.91679573059082	8.78353214263916	8.72511863708496	8.88916683197021	8.93370532989502	8.96047115325928	8.91114711761475	8.94207763671875	8.9138822555542	8.72016716003418	8.84045124053955	9.05495738983154									9	9	9	39	39	39	30.972	0	157.33	11116000000	107	0.658527	-0.0281126	-0.464706	0.15208	0.0769053	1.68868	0.79647	0.0213711	0.269641	0.580653	0.0494838	0.583753	0.53651	-0.0555341	-0.663268	Q8K4Z3
8.63012218475342	8.77227020263672	8.74540233612061	8.71187496185303	8.80628204345703	8.86850929260254	8.61168098449707	8.49609851837158	9.38183689117432	8.60104942321777	8.50550270080566	8.67058944702148	8.57859325408936	8.69348049163818	8.81583690643311									23	23	23	67.5	67.5	67.5	43.037	0	97.621	11536000000	167	0.840085	-0.0192747	-0.210713	0.646676	0.114546	0.487273	0.67686	-0.0252924	-0.437788	0.953508	-0.00601768	-0.0607811	0.584361	-0.139838	-0.584341	Q8QZS1
10.3813314437866	10.4692029953003	10.6304483413696	10.4568824768066	10.4992055892944	10.4665861129761	10.6269559860229	10.6721067428589	10.3929958343506	10.5599660873413	10.2389736175537	10.6110219955444	10.5504121780396	10.6407098770142	10.5108528137207									35	35	35	85.1	85.1	85.1	44.816	0	323.31	551140000000	994	0.29971	0.0817473	1.1349	0.4202	-0.0871545	-0.87785	0.169213	0.0937829	1.56243	0.841003	0.0120356	0.209483	0.0863797	0.180937	2.13022	Q8QZT1
8.6396951675415	8.73843193054199	8.95307350158691	8.71931457519531	8.941650390625	8.90802383422852	8.84396743774414	8.94230079650879	8.67604351043701	8.95418930053711	8.63262939453125	8.93362903594971	9.00104141235352	8.75876808166504	8.65398406982422									15	15	15	46.2	46.2	46.2	60.755	0	131.46	10570000000	133	0.0844088	0.146357	2.06552	0.945318	-0.00834139	-0.0720995	0.502068	0.0742269	0.713959	0.417161	-0.07213	-0.871152	0.542166	0.0825682	0.653708	Q8R086
8.18814086914063	8.14779949188232	8.3292760848999	7.95064210891724	8.09036350250244	8.05507278442383	8.43173313140869	8.37182521820068	8.67276287078857	8.26045322418213	7.79075384140015	8.28641128540039	8.27676010131836	8.10198783874512	8.48713874816895									7	7	7	50.2	50.2	50.2	25.172	0	62.199	3182500000	42	0.526231	0.083284	0.672618	0.722373	0.0873587	0.375955	0.272154	0.13411	1.20896	0.696563	0.0508258	0.409252	0.848651	0.0467512	0.200958	Q8R0F8
8.75427150726318	8.70451068878174	9.03370475769043	8.75079345703125	8.3079662322998	8.30120372772217	9.03092384338379	9.04048347473145	8.80899333953857	8.96134948730469	9.56473731994629	8.88957595825195	8.88973903656006	8.92805290222168	8.95545673370361									16	16	16	49.5	49.5	49.5	49.937	0	195.04	12023000000	112	0.553216	-0.140676	-0.627875	0.216082	0.300873	1.4155	0.221271	0.104886	1.36483	0.29009	0.245562	1.16007	0.358723	-0.195987	-1.01028	Q8R0N6
8.79899597167969	8.78004360198975	8.79216766357422	8.70987987518311	8.57061290740967	8.7272891998291	8.7915153503418	8.7624683380127	8.6742639541626	8.81091117858887	9.07685852050781	8.80762958526611	8.66156673431396	8.60559558868408	8.75110149383545									13	13	13	59.1	59.1	59.1	35.24	0	110.48	8493000000	121	0.323973	-0.0573003	-1.07432	0.448293	0.0837394	0.82237	0.245345	-0.0637984	-1.28751	0.925647	-0.0064981	-0.097313	0.246247	-0.147538	-1.31288	Q8R0Y8
8.17169761657715	8.39682674407959	8.14884948730469	7.84449577331543	7.57342863082886	7.32114267349243	7.97556066513062	8.03241729736328	8.35081005096436	8.03193378448486	7.87597799301147	7.96473073959351	7.88998460769653	7.80986261367798	8.18901252746582									7	7	7	23.1	23.1	23.1	36.614	0	33.461	1791200000	40	0.0878223	-0.41483	-2.03689	0.772887	-0.0542268	-0.304676	0.251979	-0.17707	-1.2674	0.252436	0.23776	1.26603	0.454616	-0.122843	-0.810249	Q8R104
7.6197714805603	7.81473350524902	7.8607931137085	7.92720079421997	6.8134446144104	6.28629636764526	7.90413093566895	7.76826047897339	8.08403968811035	7.81316709518433	7.96179103851318	7.61650705337524	7.44915437698364	7.52483749389648	7.93723678588867									5	5	5	16.1	16.1	16.1	54.766	0	33.107	902040000	29	0.17025	-0.612592	-1.55797	0.208276	0.147375	1.44425	0.21752	-0.173691	-1.37755	0.317028	0.438901	1.09126	0.0746346	-0.321065	-2.24617	Q8R123
8.67449378967285	8.59742069244385	8.75078582763672	8.85305881500244	8.95278739929199	8.69412231445313	8.8820686340332	8.85153388977051	8.70216369628906	8.92667198181152	8.88931846618652	8.881178855896	8.7752685546875	8.83234882354736	8.84232234954834									14	14	14	48.5	48.5	48.5	47.129	0	85.938	8687300000	76	0.153319	0.126188	1.63427	0.224245	0.120445	1.38646	0.100981	0.11384	1.93614	0.840708	-0.0123484	-0.209878	0.921337	-0.00660507	-0.103835	Q8R127
8.57692813873291	8.66917705535889	8.71777820587158	8.61206340789795	8.44054698944092	8.39283752441406	8.58485126495361	8.62304210662842	8.92461013793945	8.54843902587891	7.44977903366089	8.70199966430664	8.49370861053467	8.70723819732666	8.72071361541748									14	14	14	54.3	54.3	54.3	32.851	0	86.661	6684100000	83	0.0802609	-0.133667	-2.10195	0.407325	-0.336377	-0.904237	0.854917	0.0119283	0.190877	0.109605	0.145596	1.87704	0.396424	0.348306	0.927097	Q8R164
8.18358325958252	7.95363426208496	8.19384765625	8.14304637908936	8.37632179260254	8.39114665985107	8.10866641998291	8.14451217651367	8.35566234588623	7.96353769302368	7.97426271438599	8.03750610351563	8.06992721557617	8.26693725585938	8.4554386138916									4	4	4	51.6	51.6	51.6	7.4454	0	20.642	2359600000	33	0.193619	0.136634	1.46366	0.876525	-0.020707	-0.163504	0.457455	0.0889244	0.793971	0.7101	-0.0477095	-0.389864	0.517392	0.109631	0.696095	Q8R1I1
8.38288116455078	8.55414962768555	8.65789699554443	8.49239730834961	8.32135009765625	8.44410705566406	8.49366664886475	8.46991062164307	8.42716121673584	8.64447784423828	8.28578186035156	8.45018768310547	8.14823246002197	8.52103328704834	8.45756435394287									13	13	13	42.6	42.6	42.6	51.392	0	79.889	4530300000	69	0.242737	-0.0895727	-1.29555	0.558427	-0.0693576	-0.626579	0.255226	-0.127577	-1.25772	0.693613	-0.0380042	-0.4135	0.677272	-0.0582192	-0.441527	Q8R1S0
6.70901823043823	7.41595458984375	7.10171270370483	6.72300386428833	6.51714658737183	6.81847858428955	7.02251100540161	6.96419811248779	7.09520435333252	7.17289447784424	7.69519519805908	7.03486919403076	7.05751419067383	6.65327739715576	6.9700493812561									3	3	3	7.5	7.5	7.5	37.525	0.0023337	5.1027	136650000	8	0.470242	-0.156839	-0.770505	0.247504	0.333676	1.30887	0.772691	-0.0584948	-0.302214	0.527764	0.098344	0.670038	0.097506	-0.39217	-2.03485	Q8R216
7.03540229797363	6.79606533050537	6.40263080596924	6.43985795974731	7.31716442108154	7.17443799972534	6.38814687728882	7.29999732971191	7.55412673950195	6.88229322433472	7.70684003829956	7.37548065185547	7.41272926330566	6.49285411834717	7.00486660003662									2	2	2	8.1	8.1	8.1	42.014	0.0022989	4.5869	145240000	4	0.209553	0.376448	1.40525	NaN	0	NaN	0.174539	0.402994	1.53979	0.934036	0.026546	0.0863001	0.391108	-0.309604	-0.938427	Q8R2G4
7.91255664825439	8.06118869781494	8.2599515914917	8.23474502563477	7.97706460952759	7.92816543579102	8.25796604156494	8.20224285125732	8.4553165435791	8.18985557556152	7.89728593826294	8.19189834594727	8.00800323486328	8.30758190155029	8.37342739105225									8	8	8	14.8	14.8	14.8	86.108	0	34.349	2346900000	52	0.830386	-0.0257508	-0.223737	0.716254	0.0637089	0.384736	0.400856	0.103117	0.903953	0.302493	0.128868	1.12775	0.820488	0.0394084	0.239143	Q8R2Q4
8.25679016113281	8.24097347259521	8.29034614562988	8.35913276672363	7.86135530471802	8.19167423248291	8.47388076782227	8.52223587036133	8.44673919677734	8.40033054351807	8.4378137588501	8.45866775512695	8.43194198608398	8.51715660095215	8.31447792053223		+	+	mU1 NR_WT;mU1_WT					6	6	6	38.7	38.7	38.7	19.526	0	54.041	3303700000	76	0.879063	-0.0245241	-0.158765	0.00802068	0.141484	4.25924	0.0282613	0.14375	2.87447	0.328038	0.168275	1.06454	0.966778	0.00226657	0.0437755	Q8R2Y8
8.07649517059326	8.19752883911133	8.29298686981201	8.31289672851563	8.25394344329834	8.23471927642822	8.07269096374512	8.31116008758545	8.19868469238281	8.34277820587158	8.17611980438232	8.37701511383057	8.15760803222656	8.40413188934326	8.25870895385742									9	9	9	26	26	26	41.928	0	56.098	2682600000	59	0.980984	-0.00184846	-0.0248456	0.813886	0.0192173	0.248153	0.350475	0.0793891	1.01227	0.328786	0.0812376	1.06275	0.486765	0.0601718	0.75047	Q8R3F5
9.17306995391846	9.04123497009277	9.0608491897583	8.91930866241455	8.96536636352539	9.04143238067627	9.08303642272949	9.18647575378418	8.85915660858154	9.05353927612305	9.5163631439209	8.88617515563965	8.95892238616943	8.97912502288818	9.0992317199707									13	13	13	91.6	91.6	91.6	13.373	0	151.02	18466000000	146	0.778262	0.020462	0.294551	0.611321	0.094404	0.541639	0.359097	-0.0677521	-0.992901	0.216494	-0.0882142	-1.38106	0.387225	-0.162156	-0.946782	Q8R404
8.30588817596436	8.3832950592041	8.37416172027588	8.43947505950928	8.29450988769531	8.19119930267334	8.40539741516113	8.38162040710449	9.0250186920166	8.23454284667969	8.27815914154053	8.48268795013428	8.2307300567627	8.48658657073975	8.57371807098389									12	12	12	53.6	53.6	53.6	37.548	0	111.24	5392000000	77	0.342068	-0.0575233	-1.03153	0.556028	0.136869	0.630549	0.423406	0.0677257	0.858843	0.206636	0.125249	1.41563	0.777463	-0.0691429	-0.298314	Q8R4N0
7.91268444061279	7.98526906967163	7.81417417526245	7.96173906326294	7.68750238418579	7.74705410003662	7.81578350067139	8.00808906555176	7.51008892059326	7.6142430305481	7.47574663162231	7.65848827362061	7.71449756622314	8.20631313323975	7.45418930053711		+		mU1_WT					9	9	9	31.9	31.9	31.9	49.391	0	36.965	1022500000	25	0.238039	-0.103859	-1.31023	0.00106098	-0.385107	-6.78069	0.366377	-0.160095	-0.976832	0.757493	-0.0562352	-0.323225	0.293682	0.225013	1.17286	Q8VCM7
8.41587448120117	8.48895931243896	8.18740749359131	8.05568408966064	8.62991905212402	8.41530704498291	8.07291126251221	7.97020292282104	7.73750257492065	8.11760234832764	8.07479572296143	7.98004865646362	8.20428276062012	7.92845726013184	7.83071708679199									13	13	11	33.1	33.1	29.4	61.787	0	43.106	2535200000	45	0.93764	-0.0148963	-0.0815716	0.102647	-0.310348	-1.99458	0.0565572	-0.301105	-2.35646	0.146912	-0.286209	-1.66527	0.948971	0.00924289	0.067274	Q8VCT4;Q91WU0;Q8VCC2
9.00663757324219	9.01287937164307	9.35293483734131	9.12859344482422	9.09212398529053	9.14677906036377	9.3579158782959	9.48101234436035	9.66117858886719	9.31941795349121	9.72434139251709	9.40102100372314	9.25626087188721	9.18130016326904	9.52832508087158		+		mU1_WT					24	24	24	55.1	55.1	55.1	67.95	0	323.31	28547000000	238	0.280746	0.144197	1.1852	0.026419	0.443051	3.1144	0.100914	0.216465	1.93662	0.566487	0.072269	0.606373	0.164718	-0.226586	-1.62675	Q8VCW8
8.54448986053467	8.46438503265381	8.49757957458496	8.53569889068604	8.27586364746094	8.32182598114014	8.60039520263672	8.52850532531738	8.3380184173584	8.3730411529541	8.87795257568359	8.34820747375488	8.36997604370117	8.4335298538208	8.39345264434814			+	mU1 NR_WT					9	9	9	29.9	29.9	29.9	51.595	0	72.837	3983300000	71	0.366379	-0.0788908	-0.976828	0.901895	0.0191324	0.129654	0.00304018	-0.124247	-4.78725	0.594534	-0.045356	-0.561903	0.375759	-0.143379	-0.971852	Q8VD26
7.93804931640625	7.98489189147949	8.02575588226318	7.89946460723877	8.20376682281494	8.23542785644531	8.06666088104248	7.98937845230103	7.95811939239502	7.98063516616821	7.28106689453125	8.17020320892334	8.13385772705078	8.13748073577881	8.00808906555176	+		+	mU1 NR_WT;WT NR_WT					12	12	12	19.4	19.4	19.4	101.48	0	31.389	1706500000	70	0.0449953	0.161768	2.52479	0.305822	-0.2221	-1.14029	0.0156954	0.150367	3.33569	0.872375	-0.0114008	-0.16764	0.116726	0.372467	1.89422	Q8VDC0
7.42086315155029	7.54688787460327	7.7652587890625	7.38829660415649	6.77287483215332	7.07454299926758	7.35820150375366	7.25782251358032	8.04147148132324	7.46296691894531	7.68541479110718	7.29010152816772	7.25663232803345	6.43251132965088	7.5686240196228	+			WT NR_WT					5	5	5	28.2	28.2	28.2	35.705	0	44.852	507510000	14	0.0362739	-0.414466	-2.68541	0.30187	0.199624	1.15077	0.18032	-0.393359	-1.51593	0.94167	0.0211068	0.0762877	0.12522	-0.592984	-1.83955	Q8VDK1
9.69666194915771	9.58285808563232	9.56701469421387	9.48908615112305	9.89748954772949	9.92030048370361	9.64310741424561	9.64562892913818	9.20363140106201	9.47479915618896	9.29843807220459	9.65411853790283	9.7344799041748	9.7742977142334	9.51204395294189		+		mU1_WT			+	mU1 NR_mU1	54	54	33	50.6	50.6	34	112.98	0	323.31	68231000000	605	0.070261	0.192726	2.19836	0.0271432	-0.258282	-3.09053	0.283379	0.0848298	1.17805	0.303747	-0.107897	-1.12455	0.0156361	0.343112	3.59435	Q8VDN2;Q9WV27;Q9Z1W8;Q64436
7.50523138046265	7.21621322631836	7.3869309425354	6.67411327362061	7.831223487854	7.7848596572876	6.80859899520874	7.54140472412109	6.56520080566406	6.30686092376709	7.32746028900146	7.45524072647095	7.81484651565552	6.74110507965088	7.22667741775513									2	2	2	16.4	16.4	16.4	18.213	0.0012151	5.9739	392810000	11	0.361059	0.2959	0.988545	0.227224	-0.462448	-1.37612	0.708503	0.113845	0.392143	0.596964	-0.182054	-0.558109	0.179497	0.576293	1.56004	Q8VDT9
8.26311492919922	8.21606063842773	8.15654945373535	8.30558776855469	8.51714324951172	8.33069801330566	8.30672550201416	8.23992443084717	8.36015796661377	8.25326538085938	7.92000341415405	8.56634330749512	8.32487869262695	8.36914157867432	8.2028694152832									12	12	12	42.8	42.8	42.8	34.727	0	43.043	3143600000	78	0.143969	0.113295	1.67994	0.644305	-0.0575193	-0.490865	0.16277	0.13048	1.59075	0.863908	0.0171854	0.178895	0.244024	0.187999	1.32003	Q8VE38
8.73702526092529	8.6624174118042	8.55765151977539	8.5576639175415	8.85089683532715	8.62934875488281	8.85529518127441	8.77595233917236	8.75298500061035	8.66715431213379	9.10510158538818	8.876633644104	8.66307830810547	8.66689205169678	8.85704898834229									10	10	10	57.3	57.3	57.3	24.33	0	102.07	8379700000	67	0.0723664	0.149184	2.17694	0.14503	0.213057	1.7255	0.109105	0.137224	1.88033	0.8842	-0.01196	-0.151959	0.58968	-0.0758337	-0.575823	Q8VE95
7.62754011154175	7.5222487449646	6.83996915817261	6.9897985458374	6.76702499389648	6.44934415817261	6.11544322967529	7.31834840774536	7.94837856292725	6.95808696746826	7.72508192062378	6.82334756851196	6.99992752075195	7.54293727874756	6.81249570846558									2	2	2	14.5	14.5	14.5	21.539	0.0012407	6.2013	382200000	5	0.119784	-0.582349	-1.81296	0.419734	0.29896	0.878793	0.46901	-0.200212	-0.772746	0.261132	0.382137	1.2404	0.182604	-0.499172	-1.54671	Q9CQW2;Q8VEH3
10.5017166137695	10.4769334793091	10.4466772079468	10.5492973327637	10.4465684890747	10.5658359527588	10.5426387786865	10.442777633667	10.6771049499512	10.4377508163452	10.533670425415	10.4759759902954	10.4999752044678	10.5976734161377	10.4922151565552									34	34	34	72.5	72.5	72.5	39.632	0	323.31	513400000000	885	0.885657	0.00579906	0.150031	0.420022	0.0558526	0.878211	0.539396	0.0228038	0.650614	0.700977	0.0170047	0.402912	0.641189	-0.0330488	-0.495599	Q8VEM8
7.63463830947876	6.57904434204102	7.49777269363403	7.46799278259277	7.64575624465942	7.47098350524902	7.62463283538818	7.55771160125732	7.84490585327148	7.52978944778442	7.87821054458618	7.48911428451538	7.60126686096191	7.73745489120483	7.87199878692627									9	7	7	3.6	3.3	3.3	291.12	0	19.919	606090000	31	0.295953	0.279909	1.14465	0.189256	0.456107	1.51888	0.186999	0.380097	1.48925	0.317337	0.100188	1.0905	0.598197	-0.0760099	-0.562281	Q8VHX6;Q80X90
7.19570589065552	7.17950057983398	6.74118518829346	7.17434644699097	7.30246067047119	7.41579103469849	7.33955097198486	6.44593572616577	7.02049589157104	7.33298349380493	7.63961315155029	6.54421186447144	6.17811489105225	7.32054090499878	7.29710388183594									2	2	2	16.5	16.5	16.5	22.514	0	17.613	170630000	6	0.840454	0.0532501	0.210219	0.250252	0.258346	1.30015	0.464612	-0.237692	-0.780781	0.454403	-0.290942	-0.799642	0.234871	-0.496038	-1.35013	Q8VIK2
8.25978469848633	8.25887680053711	8.40596103668213	8.31132984161377	8.20620536804199	8.32161903381348	8.37149238586426	8.51727485656738	8.29638004302979	8.45800304412842	8.39459133148193	8.50272750854492	8.25878047943115	8.46688270568848	8.52823543548584									8	8	8	26.5	26.5	26.5	42.536	0	25.225	3541200000	50	0.559643	0.0451598	0.617423	0.249023	0.0740034	1.30404	0.114314	0.130168	1.84669	0.376582	0.0850086	0.954727	0.52694	0.0561651	0.679601	Q91V12
7.86201810836792	7.91476631164551	7.86970663070679	7.74993705749512	7.84897089004517	7.81184959411621	7.86009836196899	7.94598054885864	7.95654773712158	7.7898907661438	7.56080532073975	8.08657360076904	7.85516166687012	7.8582124710083	7.97815322875977									9	9	9	35.1	35.1	35.1	41.87	0	20.675	1184600000	28	0.709448	0.0176178	0.390794	0.478571	-0.0800258	-0.765428	0.195433	0.0954182	1.45679	0.257431	0.0778004	1.25121	0.19141	0.175444	1.51008	Q91VA6
7.48911428451538	7.2678050994873	7.36958694458008	6.87799024581909	7.63135242462158	7.85837459564209	7.48609018325806	7.31198692321777	7.81300687789917	6.65393781661987	7.74743366241455	7.44466924667358	7.71649599075317	7.90533685684204	7.38664150238037									3	3	3	9.2	9.2	9.2	37.275	0	12.434	598920000	30	0.117742	0.320827	1.82537	0.680076	0.153669	0.437389	0.089964	0.362162	2.01949	0.813198	0.0413349	0.246925	0.572606	0.208493	0.603336	Q91VC9
10.4757146835327	10.3519315719604	10.3057813644409	10.2338085174561	10.3323774337769	10.3446474075317	10.1998376846313	10.2616672515869	9.61660194396973	10.2343902587891	10.0870714187622	10.2537984848022	10.2159280776978	10.3096084594727	10.0561418533325									62	62	62	76.1	76.1	76.1	79.776	0	323.31	294250000000	1086	0.384484	-0.0571766	-0.937928	0.0821888	-0.362454	-2.16956	0.12446	-0.13294	-1.7853	0.281215	-0.0757632	-1.18393	0.23166	0.229515	1.36094	Q91VD9
8.86859703063965	8.93605136871338	8.91129589080811	8.64754962921143	8.77974796295166	8.81765174865723	8.95706081390381	8.96229362487793	9.0896577835083	8.8137674331665	8.20000171661377	8.98597812652588	8.72457122802734	8.92920970916748	8.96689224243164									18	18	18	71.5	71.5	71.5	38.114	0	120.49	12158000000	126	0.653063	0.0383151	0.472801	0.575475	-0.139731	-0.598678	0.521328	0.0607893	0.680905	0.778674	0.0224743	0.293985	0.425472	0.200521	0.867225	Q91VM9
9.66879558563232	9.66036224365234	9.46930599212646	9.48161506652832	9.67339897155762	9.75911617279053	9.44513702392578	9.4301233291626	10.1494035720825	9.31460475921631	9.18067073822021	9.64046192169189	9.61953163146973	9.75139427185059	9.73679447174072									28	28	28	44.6	44.6	44.6	32.886	0	311.09	80670000000	340	0.946442	0.00692415	0.0700349	0.93686	-0.0217934	-0.0832806	0.117435	0.117026	1.82725	0.26162	0.110102	1.23898	0.611752	0.138819	0.540966	Q91VR2
8.75097846984863	8.67984580993652	8.82207679748535	8.81168270111084	8.6278772354126	8.67331600189209	8.9400634765625	8.73874092102051	8.90622234344482	8.75810146331787	8.94820213317871	8.6715612411499	8.65586757659912	8.844557762146	8.8510684967041									9	9	9	42.4	42.4	42.4	25.414	0	125.75	10321000000	111	0.790915	-0.0211465	-0.27722	0.151473	0.104696	1.69178	0.873578	-0.0103822	-0.166042	0.905651	0.0107644	0.123624	0.206729	-0.115078	-1.45007	Q91VT4
6.92146778106689	6.61942863464355	7.02555179595947	7.15497159957886	7.02058887481689	6.66475677490234	7.25534391403198	6.57139110565186	7.51248407363892	7.38239526748657	7.76759767532349	7.0058765411377	7.22954511642456	6.50115871429443	7.09687519073486		+		mU1_WT			+	mU1 NR_mU1	2	2	2	4.3	4.3	4.3	46.415	0.0071721	3.0736	147360000	7	0.79786	-0.0523348	-0.267747	0.0128503	0.623804	3.783	0.890963	0.0280089	0.143012	0.732985	0.0803437	0.35746	0.0368209	-0.595795	-2.82662	Q91W90
7.67353677749634	7.46440029144287	7.44845914840698	7.5676965713501	7.48607587814331	7.44208765029907	7.96175813674927	7.62110376358032	7.87134504318237	7.71432161331177	7.20505809783936	7.50126457214355	7.57173204421997	7.76934766769409	7.6203441619873									8	8	8	16.5	16.5	16.5	78.016	0	22.847	629830000	20	0.514095	0.0892332	0.693222	0.757797	0.0583851	0.325761	0.355667	0.0771489	1.00056	0.929312	-0.0120842	-0.0924995	0.921532	0.0187639	0.103576	Q91WC3
10.1098823547363	10.032940864563	9.95899868011475	9.80562973022461	9.74882316589355	9.82652187347412	9.8320426940918	9.95440673828125	9.4483814239502	9.84400463104248	9.72329998016357	9.84697341918945	9.6440544128418	9.96347618103027	9.72931098937988									37	37	37	79.5	79.5	79.5	52.625	0	323.31	123980000000	676	0.128971	-0.136414	-1.75957	0.0578655	-0.304968	-2.451	0.106001	-0.180909	-1.90115	0.605057	-0.0444949	-0.545536	0.376909	0.124058	0.969311	Q91WD5
8.50082588195801	8.26226139068604	8.35187339782715	8.31016159057617	8.80931091308594	8.74081993103027	8.42727470397949	8.4563512802124	8.33199405670166	8.38815498352051	8.57662963867188	8.63701915740967	8.62201690673828	8.6068000793457	8.2740650177002									8	8	8	55.6	55.6	55.6	12.097	0	51.294	5656400000	82	0.0620821	0.252159	2.28838	0.421917	0.075979	0.874378	0.128132	0.178695	1.76429	0.594471	-0.0734639	-0.562001	0.432222	0.102716	0.853772	Q91WS0
7.63882875442505	6.96406221389771	7.63272047042847	7.54468822479248	7.40334367752075	7.44720458984375	7.68327236175537	7.50890684127808	7.60892152786255	7.49487781524658	7.5447039604187	7.3001823425293	7.42616939544678	7.96081304550171	7.64472389221191									8	8	8	16.1	16.1	16.1	51.317	0	16.71	532760000	18	0.717664	0.065607	0.379104	0.612393	0.104426	0.539964	0.548614	0.137897	0.635407	0.661773	0.0722903	0.459913	0.854519	0.0334711	0.193047	Q91X72
7.68461179733276	7.99496364593506	7.80078601837158	7.87842988967896	8.01878356933594	7.96842241287231	7.84083366394043	7.9213171005249	6.96743154525757	7.87467908859253	7.4673376083374	7.69166469573975	7.73399114608765	7.65185928344727	7.61613941192627					+	mU1 NR_WT NR			8	8	8	15.8	15.8	15.8	81.288	0	23.577	905460000	17	0.243293	0.0976413	1.29383	0.143683	-0.403215	-1.73274	0.0552903	-0.166284	-2.37305	0.00115981	-0.263926	-5.79194	0.333766	0.236931	1.06942	Q91YJ5
8.55222988128662	8.66276741027832	8.58470439910889	8.56025314331055	8.76993846893311	8.4805383682251	8.49739933013916	8.60066795349121	8.17539596557617	8.52162170410156	8.27749443054199	8.77250480651855	8.2765998840332	8.50505447387695	8.31158447265625		+		mU1_WT					13	13	13	34.1	34.1	34.1	71.513	0	93.628	5411700000	96	0.969294	-0.00285268	-0.0401261	0.0332169	-0.265151	-2.91472	0.32965	-0.123553	-1.06069	0.394827	-0.1207	-0.916339	0.415748	0.141599	0.886901	Q91YM4
8.69416618347168	8.68440532684326	8.7868013381958	8.60929584503174	8.25350761413574	8.28927707672119	8.65619373321533	8.6693172454834	8.75624084472656	8.7223539352417	8.62445735931396	8.53035354614258	8.28116989135742	8.48828315734863	8.85108661651611									17	17	17	49.6	49.6	49.6	50.898	0	61.966	6612100000	98	0.105428	-0.226593	-1.90506	0.897549	0.00735021	0.135438	0.252816	-0.155944	-1.26489	0.680585	0.0706494	0.432363	0.305952	-0.163294	-1.13995	Q91YP0
6.50539207458496	7.43150854110718	7.25469303131104	7.27174854278564	6.83117866516113	6.49747848510742	7.28829383850098	7.25214862823486	8.32283973693848	7.40263938903809	7.39211463928223	7.47813320159912	6.60429716110229	6.65843963623047	7.47824907302856									6	6	6	12.4	12.4	12.4	80.428	0	25.234	526920000	8	0.614496	-0.148561	-0.530992	0.158437	0.590029	1.65692	0.855303	-0.0610558	-0.190362	0.78621	0.0875049	0.283653	0.15408	-0.651085	-1.67855	Q91YP2
7.82953548431396	7.84935188293457	7.80400323867798	7.83608341217041	7.72908353805542	7.91513586044312	7.85602760314941	7.83647584915161	7.76196527481079	8.03144931793213	7.33439874649048	7.83768939971924	7.73904991149902	7.9385199546814	7.79048919677734									9	9	9	24.2	24.2	24.2	68.527	0	16.397	980070000	24	0.915221	0.00443721	0.11102	0.510587	-0.120472	-0.707979	0.941881	-0.00330639	-0.0760119	0.897308	-0.0077436	-0.134629	0.537422	0.117166	0.661723	Q91YQ5
10.4749002456665	10.3267660140991	10.351487159729	10.1914234161377	10.3990850448608	10.486515045166	10.3924856185913	10.4691295623779	9.48387241363525	10.2817373275757	10.1382713317871	10.2836856842041	10.3548574447632	10.3846578598022	10.0701484680176									50	50	50	77.8	77.8	77.8	50.834	0	323.31	318360000000	864	0.160449	0.10066	1.60121	0.149987	-0.368184	-1.69943	0.519054	-0.0628068	-0.684765	0.0718386	-0.163466	-2.18224	0.227287	0.305377	1.3759	Q91YT0
6.33602428436279	7.74046516418457	6.8496732711792	7.74601888656616	6.86744594573975	6.49262523651123	7.73928737640381	7.80117702484131	8.22359943389893	6.65372705459595	7.49609565734863	7.91505146026611	7.05297994613647	7.89239501953125	7.85122156143188									7	7	7	26.8	26.8	26.8	35.328	0	32.245	963950000	7	0.908402	0.0570885	0.119997	0.627035	0.289762	0.51726	0.255879	0.509867	1.25579	0.284708	0.452778	1.17446	0.647442	0.220105	0.486113	Q91Z53
9.80035305023193	9.78651714324951	9.83431243896484	9.65745735168457	9.9849910736084	9.96550273895264	9.88740921020508	9.94032192230225	9.60747623443604	9.78555011749268	9.60254859924316	9.94623565673828	9.93189525604248	9.9094705581665	9.80204772949219	+		+	mU1 NR_WT;WT NR_WT			+	mU1 NR_mU1	62	62	62	75.8	75.8	75.8	79.921	0	323.31	106890000000	836	0.00741262	0.174896	3.9646	0.185539	-0.104468	-1.53431	0.045207	0.127752	2.52131	0.271233	-0.0471439	-1.21154	0.0146338	0.232221	3.65745	Q91ZA3
7.69104623794556	7.73844766616821	7.92196702957153	7.57473707199097	7.48505401611328	7.54667854309082	7.83305788040161	7.87204551696777	7.74620580673218	7.81983327865601	7.4165678024292	7.67083930969238	7.5327672958374	7.82853078842163	7.74268579483032									6	6	6	14.5	14.5	14.5	49.609	0	19.994	790310000	35	0.71134	-0.0473405	-0.388097	0.62138	-0.0706805	-0.525993	0.705735	-0.0378437	-0.396097	0.93771	0.00949681	0.0814802	0.806953	0.0328368	0.257639	Q91ZE0
7.72273254394531	7.77876615524292	7.64387702941895	7.7304105758667	7.45301246643066	6.72633361816406	7.58086776733398	6.97307968139648	7.67464971542358	6.12088584899902	7.6966290473938	7.77988481521606	6.90525722503662	7.79875421524048	7.68267726898193	+			WT NR_WT					6	6	6	14.6	14.6	14.6	56.979	0	18.486	588910000	6	0.0384323	-0.535623	-2.6421	0.26069	-0.554892	-1.26783	0.442042	-0.177303	-0.822886	0.26749	0.35832	1.22212	0.48776	0.377589	0.748667	Q91ZJ5
6.6032567024231	6.52280044555664	6.81832933425903	6.79759502410889	6.76518487930298	6.53066110610962	6.99401807785034	6.73315000534058	6.98569583892822	7.22175312042236	7.78384447097778	6.22797060012817	6.52808666229248	7.34212636947632	7.23777008056641		+		mU1_WT					4	4	4	1	1	1	504.74	0	8.921	114400000	6	0.578145	0.0702581	0.587733	0.0305645	0.644936	2.98666	0.615791	0.148493	0.529007	0.794473	0.0782349	0.272363	0.245031	-0.496443	-1.31679	Q91ZX7
10.626350402832	10.5620193481445	10.4962787628174	10.3358592987061	10.6793098449707	10.6751728057861	10.55881690979	10.6561460494995	10.3332252502441	10.4732532501221	10.3646821975708	10.6086864471436	10.6034479141235	10.6052513122559	10.4742889404297							+	mU1 NR_mU1	56	56	56	86.4	86.4	86.4	68.09	0	323.31	557350000000	1289	0.0919123	0.137234	2.00402	0.220002	-0.11474	-1.40143	0.373405	0.0677917	0.961558	0.16065	-0.0694427	-1.6003	0.0179364	0.182532	3.46547	Q921G7
6.33883476257324	6.92135667800903	6.48651266098022	6.33059597015381	6.88319873809814	6.62244510650635	6.43698930740356	6.39431142807007	7.31670427322388	6.55864858627319	7.51087665557861	7.0794734954834	7.16160106658936	7.03169250488281	6.51665353775024									2	2	2	10.8	10.8	10.8	25.617	0.0071648	3.0697	64139000	2	0.727623	0.0649111	0.365013	0.0923048	0.609418	2.07793	0.0777459	0.42803	2.12499	0.0953363	0.363119	1.97763	0.569607	-0.181388	-0.608222	Q921H9
8.73849487304688	8.56810760498047	8.49483585357666	8.65681648254395	8.68218994140625	8.63263988494873	8.63549423217773	8.69563007354736	8.42314720153809	8.45403671264648	8.11337471008301	8.59123134613037	8.67910099029541	8.82321357727051	8.63174819946289		+		mU1_WT			+	mU1 NR_mU1	24	24	24	46.2	46.2	46.2	76.723	0	149.22	6217500000	142	0.428931	0.0469248	0.848063	0.0497947	-0.284377	-2.57397	0.397095	0.0667598	0.911663	0.721507	0.019835	0.373657	0.0233713	0.351137	3.22362	Q921I1;Q9DBD0
7.44476270675659	7.05138206481934	6.44645357131958	7.59923887252808	7.91762113571167	7.75781345367432	6.83631992340088	6.56701564788818	7.62575483322144	7.42295074462891	7.58477210998535	6.41174221038818	6.99013710021973	6.40941429138184	6.71046495437622							+	mU1 NR_mU1	2	2	2	7.9	7.9	7.9	28.274	0.0013123	7.5858	529700000	6	0.760939	0.134233	0.318447	0.24217	0.409033	1.32604	0.134736	-0.50502	-1.72795	0.127807	-0.639253	-1.76613	0.00320628	-0.914053	-5.29458	Q921N7
8.32368469238281	8.35247230529785	8.39766216278076	8.23761940002441	8.30042171478271	8.21026515960693	8.386962890625	8.42546939849854	8.08048248291016	8.37452793121338	7.80879259109497	8.31236743927002	8.22629070281982	8.21189403533936	8.24144649505615									17	17	17	56	56	56	48.34	0	133.42	2974500000	80	0.961874	0.00292015	0.0498323	0.152773	-0.239925	-1.68515	0.095549	-0.07986	-1.97602	0.168377	-0.0827801	-1.56605	0.302182	0.160065	1.14994	Q921S7
8.62692546844482	8.67717838287354	8.60663890838623	8.67397880554199	8.31058692932129	8.65315437316895	8.56531620025635	8.7434549331665	9.04285144805908	8.5757999420166	8.78560066223145	8.6040096282959	8.45377731323242	8.53555965423584	8.76027965545654									11	11	11	40.2	40.2	40.2	35.294	0	92.988	7599700000	70	0.442062	-0.0780523	-0.822849	0.234506	0.155237	1.35135	0.423678	-0.0577738	-0.858309	0.864263	0.0202785	0.178423	0.179884	-0.213011	-1.55837	Q922B1
7.08328771591187	7.25241613388062	7.32870578765869	7.21338510513306	7.3294792175293	7.37383127212524	7.20774221420288	7.16506624221802	6.84463882446289	7.41155242919922	7.86347246170044	7.20959520339966	7.2838888168335	7.03402662277222	7.22569704055786									3	3	3	5.4	5.4	5.4	78.947	0.0013106	7.5806	257600000	14	0.512159	0.0495811	0.696539	0.571276	0.153773	0.605502	0.689977	-0.0311468	-0.418747	0.311296	-0.0807278	-1.10548	0.500355	-0.184919	-0.726055	Q922E6
7.91690111160278	7.76208543777466	7.98587989807129	8.03746604919434	7.95992803573608	7.87901544570923	7.84354400634766	7.96417951583862	7.95603370666504	8.040602684021	7.71537637710571	8.0601692199707	8.07631301879883	8.05652332305908	7.84582948684692									7	7	7	17.5	17.5	17.5	38.194	0	25.877	1419700000	49	0.842164	-0.0139164	-0.207927	0.849454	-0.0215789	-0.199874	0.339759	0.0841256	1.03689	0.167577	0.098042	1.56953	0.356711	0.105705	1.01492	Q922Q1
8.46744537353516	8.58366298675537	8.56181621551514	8.46609592437744	8.76502704620361	8.76110076904297	8.69015216827393	8.619948387146	8.88926792144775	8.49419593811035	7.4992847442627	8.58099365234375	8.77437782287598	8.7325382232666	8.59731101989746	+		+	mU1 NR_WT;WT NR_WT					15	15	15	53.3	53.3	53.3	43.371	0	118.16	6972400000	101	0.00637257	0.189302	4.09787	0.545452	-0.225506	-0.648183	0.0384188	0.15155	2.64236	0.547623	-0.0377519	-0.637035	0.331386	0.377056	1.07526	Q924D0
6.47012376785278	7.01966905593872	8.07140350341797	7.93316841125488	6.50261402130127	6.68246793746948	6.85405826568604	6.86246538162231	7.16178035736084	7.98342323303223	8.19512462615967	6.67796230316162	6.28874397277832	7.27543067932129	6.4955883026123							+	mU1 NR_mU1	2	2	2	10.3	10.3	10.3	32.313	0	19.541	708910000	10	0.147867	-0.64819	-1.66057	0.471517	0.406518	0.778452	0.165198	-0.68916	-1.57996	NaN	0	NaN	0.0298325	-1.09568	-3.00775	Q924T2
10.2900123596191	10.2718877792358	10.3043394088745	10.2116813659668	10.3125791549683	10.4091377258301	10.2630910873413	10.2412223815918	10.2351999282837	10.2709350585938	10.3351564407349	10.3236236572266	10.1925678253174	10.2464742660522	10.166163444519									70	70	68	71	71	71	88.216	0	323.31	284090000000	1183	0.417376	0.0370274	0.870726	0.762782	0.0109502	0.318776	0.390567	-0.0372729	-0.925178	0.195404	-0.0743003	-1.4569	0.359795	-0.0482232	-1.00782	Q924X2
7.88155603408813	7.7469220161438	7.9115891456604	7.59576082229614	7.72524976730347	7.82157897949219	7.80617332458496	7.96499443054199	8.2582540512085	7.78295946121216	7.68190240859985	7.87228441238403	7.7794303894043	8.11149787902832	7.94051170349121									13	13	13	15.1	15.1	15.1	66.741	0	34.211	1214500000	44	0.622411	0.0455421	0.518892	0.502829	0.123748	0.721661	0.208097	0.141974	1.41041	0.305194	0.096432	1.12086	0.918906	0.0182258	0.107058	Q925I1
8.71977043151855	8.67693138122559	8.57546520233154	8.56439399719238	8.55809593200684	8.33465480804443	8.59932613372803	8.64167213439941	8.90171432495117	8.63458824157715	8.20660972595215	8.48291683197021	8.42496299743652	8.45666980743408	8.78409671783447									18	18	18	49.4	49.4	49.4	54.735	0	165.29	6559300000	100	0.246025	-0.100703	-1.28543	0.773858	-0.0531695	-0.303324	0.329971	-0.0969787	-1.05992	0.973533	0.00372434	0.0345839	0.83188	-0.0438092	-0.223651	Q99J39
8.23220825195313	8.21611309051514	8.36500072479248	8.09029293060303	7.94988250732422	7.96562957763672	8.38315105438232	8.12453651428223	8.49179553985596	8.13123321533203	8.45647239685059	8.19612121582031	8.09173774719238	8.31935596466064	8.53272914886475									11	11	11	45.1	45.1	45.1	33.097	0	53.802	2937100000	48	0.337119	-0.120104	-1.04305	0.303325	0.13393	1.1469	0.611082	0.0590823	0.536238	0.242264	0.179186	1.29702	0.63372	-0.0748477	-0.506995	Q99J99
7.6686749458313	7.65047264099121	7.77496194839478	7.77550840377808	6.68349742889404	7.19780397415161	7.91925096511841	8.04241752624512	8.7369384765625	7.85762214660645	7.49556112289429	7.3093957901001	7.47209787368774	7.77917051315308	8.41172027587891									10	10	10	47.6	47.6	47.6	38.384	0	131.07	1665700000	33	0.454246	-0.256662	-0.799935	0.360808	0.312636	1.0055	0.920075	0.0256916	0.104636	0.507971	0.282354	0.70374	0.526542	-0.286944	-0.680284	Q99JB2
7.52919912338257	7.83310270309448	7.79164171218872	7.55400419235229	7.60888957977295	7.45166349411011	7.53769302368164	7.8727912902832	8.17201900482178	7.71432161331177	7.49739074707031	7.62544631958008	7.54517078399658	7.68250608444214	7.80748748779297									5	5	5	28.2	28.2	28.2	27.702	0	39.837	878010000	17	0.639919	-0.0592276	-0.492421	0.564469	0.11759	0.61663	0.906095	-0.0118343	-0.123038	0.671408	0.0473933	0.445755	0.501396	-0.129424	-0.724205	Q99JR6
10.7618522644043	10.7119588851929	10.6693916320801	10.6189365386963	10.6273040771484	10.7587080001831	10.6406202316284	10.7142629623413	10.7206802368164	10.5818243026733	10.6598310470581	10.6370496749878	10.6119356155396	10.6326999664307	10.6892995834351									51	51	51	78.5	78.5	78.5	51.386	0	323.31	814870000000	1555	0.90681	-0.00531101	-0.122095	0.492982	-0.036423	-0.739241	0.216497	-0.0477886	-1.38105	0.272489	-0.0424776	-1.20802	0.781635	-0.0113657	-0.292525	Q99JY0
7.87931394577026	7.8484845161438	8.11571025848389	7.97267961502075	8.02505970001221	8.11684036254883	8.1294641494751	8.24745750427246	8.13748073577881	8.16211605072021	7.77211618423462	8.26249885559082	8.33039379119873	8.23027038574219	8.17949390411377			+	mU1 NR_WT					6	6	6	26.9	26.9	26.9	34.084	0	66.601	1962300000	73	0.0586256	0.175658	2.33019	0.606405	0.0698572	0.549339	0.00469948	0.296617	4.37383	0.0721079	0.120959	2.17953	0.0986145	0.22676	2.02599	Q99KB8
11.1326761245728	11.1213302612305	11.0909986495972	10.9117488861084	11.3779983520508	11.3578014373779	11.2058534622192	11.2448215484619	11.0866804122925	11.0453233718872	10.7841815948486	11.2732791900635	11.2787990570068	11.2834367752075	11.108226776123	+		+	mU1 NR_WT;WT NR_WT			+	mU1 NR_mU1	102	102	102	80.4	80.4	80.4	85.462	0	323.31	2324300000000	2699	0.0129702	0.23243	3.49083	0.399186	-0.0921267	-0.921258	0.0424975	0.171747	2.56715	0.35027	-0.0606833	-1.01274	0.0375621	0.263874	2.80969	Q99KI0
9.35173797607422	9.3637809753418	9.42380237579346	9.17837238311768	9.62234878540039	9.57085800170898	9.5836181640625	9.44263648986816	9.34311294555664	9.39008712768555	9.09635353088379	9.57146453857422	9.54973888397217	9.61664390563965	9.39553642272949	+		+	mU1 NR_WT;WT NR_WT			+	mU1 NR_mU1	14	14	14	76.7	76.7	76.7	21.737	0	210.28	42174000000	193	0.0138547	0.225442	3.43682	0.614288	-0.0529056	-0.537009	0.0288432	0.203923	2.8589	0.739717	-0.0215194	-0.348011	0.042685	0.256828	2.70194	Q99KR7;Q9QZH3
8.20892524719238	8.15026473999023	8.13706874847412	8.34482479095459	8.32876682281494	8.47494411468506	8.12762260437012	8.1887035369873	8.16835021972656	8.3825216293335	8.75491333007813	7.97019338607788	8.1495885848999	8.1334753036499	8.13010883331299									7	7	7	32.6	32.6	32.6	34.005	0	38.449	2253600000	60	0.471737	0.0697384	0.76779	0.203847	0.224991	1.46103	0.121438	-0.114429	-1.80305	0.0816281	-0.184168	-2.08974	0.0755713	-0.33942	-2.23623	Q99L04
9.30954456329346	9.31382465362549	9.19010734558105	9.14900302886963	9.22993755340576	9.1498966217041	9.35001564025879	9.30573844909668	9.5203914642334	9.28148746490479	9.01790904998779	9.12365531921387	9.05854034423828	9.23716640472412	9.56541061401367									22	22	22	57.3	57.3	57.3	35.44	0	318.68	32483000000	278	0.773637	0.0182772	0.300912	0.813322	0.0326428	0.248922	0.964511	0.00557327	0.0463816	0.919745	-0.0127039	-0.10507	0.886509	-0.0270695	-0.150159	Q99L13
7.90257406234741	7.89156532287598	7.97530317306519	6.78594827651978	6.60215759277344	6.95835638046265	8.08001327514648	8.14329624176025	8.30118179321289	8.11247062683105	7.66204595565796	7.76987171173096	7.72450542449951	7.8573203086853	8.30700397491455									2	2	2	8.6	8.6	8.6	51.313	0	9.4876	1471200000	16	0.704082	-0.192892	-0.398463	0.347214	0.386385	1.03711	0.414474	0.275828	0.87649	0.300305	0.468719	1.13337	0.642503	-0.110557	-0.493602	Q99L43
8.89039897918701	8.9236011505127	9.14479160308838	9.06382083892822	9.16914558410645	9.0963888168335	9.13043022155762	9.16109848022461	9.25949859619141	9.11330795288086	9.17359447479248	9.42963886260986	9.21061229705811	9.22065734863281	9.11988258361816			+	mU1 NR_WT					21	21	21	62	62	62	29.884	0	237.36	20503000000	184	0.0743858	0.133613	2.15698	0.0759091	0.176481	2.23268	0.0354573	0.239545	2.70251	0.168049	0.105932	1.56748	0.492771	0.0630641	0.73962	Q99LB2
10.5583486557007	10.4466772079468	10.4648027420044	10.2906351089478	10.2421932220459	10.296160697937	10.5691986083984	10.532919883728	9.76039218902588	10.3763399124146	10.6284914016724	10.3279514312744	10.3196468353271	10.4924669265747	10.2576541900635									36	36	36	83.1	83.1	83.1	40.603	0	323.31	336600000000	810	0.772985	-0.0299978	-0.30181	0.449208	-0.185041	-0.820608	0.271147	-0.0906861	-1.21178	0.552689	-0.0606883	-0.628737	0.690749	0.0943553	0.421716	Q99LC3
10.8560037612915	10.8243341445923	10.8248996734619	10.734824180603	10.9657144546509	10.95006275177	11.0345478057861	11.0254287719727	10.7110052108765	10.8554468154907	10.7032566070557	10.9439744949341	11.0464563369751	10.9436674118042	10.859546661377	+		+	mU1 NR_WT;WT NR_WT			+	mU1 NR_mU1	40	40	40	94	94	94	35.009	0	323.31	1147700000000	1304	0.00155521	0.183923	5.47185	0.348437	-0.0534459	-1.03423	0.02439	0.138396	2.98778	0.337627	-0.0455272	-1.04186	0.026025	0.191842	3.1277	Q99LC5
8.47945976257324	8.68832206726074	8.50566577911377	8.59819984436035	8.18957424163818	8.16554069519043	8.46188831329346	8.40062427520752	8.8843822479248	8.4847412109375	8.48689746856689	8.29338455200195	8.27531147003174	8.35251045227051	8.74896240234375	+			WT NR_WT					11	11	11	59.4	59.4	59.4	24.307	0	67.998	5215000000	68	0.0245437	-0.263505	-2.98292	0.700514	0.0507618	0.407481	0.261707	-0.15037	-1.23873	0.431653	0.113135	0.84279	0.296686	-0.201131	-1.16469	Q99LP6
7.99008560180664	8.10263919830322	8.07871055603027	7.95967578887939	8.13155460357666	8.26578426361084	7.84713459014893	7.81998443603516	8.21192073822021	8.10054302215576	7.79610919952393	8.07729530334473	7.95719528198242	8.16058826446533	8.14179420471191									3	3	3	27	27	27	20.021	0	32.709	1823100000	26	0.888888	-0.0166633	-0.145755	0.976791	0.0034132	0.0305749	0.404398	0.0514405	0.896743	0.585835	0.0681038	0.57556	0.699232	0.0480273	0.409345	Q99LX0
7.44002723693848	7.42883110046387	6.6634373664856	7.43026876449585	7.65999221801758	7.85372257232666	7.39294290542603	7.38937854766846	7.14956951141357	7.33362865447998	7.82343626022339	7.63922739028931	7.89856052398682	7.78690052032471	7.45310401916504									4	4	4	44.3	44.3	44.3	12.648	0	12.995	498470000	19	0.185576	0.333368	1.49486	0.521784	0.194904	0.688483	0.0795218	0.453807	2.10864	0.44781	0.120439	0.811982	0.258753	0.258903	1.27374	Q99LY9
8.61537170410156	8.58480644226074	8.60324192047119	8.50803089141846	8.80428981781006	8.84156608581543	8.57303428649902	8.67592525482178	8.60263538360596	8.58359527587891	8.36199188232422	8.5805139541626	8.55116939544678	8.5071268081665	8.63020420074463									12	12	12	35.4	35.4	35.4	52.443	0	155.17	6344800000	90	0.0693184	0.145841	2.20816	0.421747	-0.0617886	-0.874722	0.774162	-0.0106091	-0.300189	0.0573965	-0.15645	-2.34568	0.506082	0.0511794	0.715906	Q99M87
9.4601001739502	9.42918682098389	9.51345729827881	9.4125280380249	9.50118255615234	9.51609897613525	9.45496654510498	9.50182628631592	9.39797496795654	9.43168544769287	9.32878684997559	9.45897006988525	9.42509365081787	9.42125797271729	9.44785499572754					+	mU1 NR_WT NR			34	34	34	76	76	76	58.408	0	323.31	43797000000	388	0.175793	0.0397005	1.53455	0.122826	-0.067669	-1.85456	0.541093	-0.0155239	-0.647802	0.013939	-0.0552244	-3.43188	0.116543	0.0521451	1.89544	Q99MN9
9.44763851165771	9.42823219299316	9.53382301330566	9.33725929260254	9.52149105072021	9.57976055145264	9.54629611968994	9.55551719665527	9.21165466308594	9.49144554138184	9.16631126403809	9.57234859466553	9.52153015136719	9.51880359649658	9.38315105438232	+			WT NR_WT					39	39	39	63.7	63.7	63.7	79.343	0	323.31	45954000000	515	0.0351284	0.114028	2.70952	0.192272	-0.146934	-1.50658	0.318178	0.0622201	1.08844	0.266255	-0.0518079	-1.22564	0.0850933	0.209155	2.14208	Q99MR8
7.26330471038818	7.28569221496582	7.47699117660522	7.57425117492676	7.62434387207031	7.6292667388916	7.22530937194824	7.13538694381714	6.5793719291687	7.47931623458862	7.51519203186035	8.0460262298584	7.42507743835449	7.99114179611206	7.20533990859985									4	4	4	20.5	20.5	20.5	28.702	0	18.303	495200000	24	0.982102	0.00351691	0.0233846	0.476179	-0.208766	-0.769828	0.273567	0.266837	1.20501	0.324851	0.26332	1.0722	0.238464	0.475603	1.33819	Q99N84
7.79439067840576	7.68155765533447	7.67182064056396	7.61547660827637	7.77597427368164	7.99645471572876	7.6021032333374	7.6501522064209	6.90658521652222	7.57248830795288	7.73596906661987	7.85805559158325	7.72248601913452	7.63548374176025	7.32058238983154									4	4	4	34.2	34.2	34.2	22.321	0	16.283	706530000	25	0.520212	0.0653597	0.682798	0.244569	-0.285797	-1.31828	0.653782	-0.0566595	-0.471734	0.429766	-0.122019	-0.846443	0.40408	0.229138	0.910991	Q99N85
7.92610549926758	7.89768218994141	7.92199850082397	7.65538835525513	7.93925952911377	7.88353633880615	7.90030145645142	7.85713338851929	6.68897390365601	7.9502968788147	7.73108911514282	8.11885929107666	7.67147827148438	7.95777940750122	7.74958944320679									5	5	5	11.8	11.8	11.8	48.206	0	14.052	1206800000	39	0.531858	0.044764	0.663171	0.292475	-0.393507	-1.17616	0.848031	0.024133	0.200074	0.847691	-0.0206311	-0.200529	0.282566	0.41764	1.20374	Q99N87
7.02545213699341	7.48227310180664	7.46880483627319	7.38388729095459	7.29123544692993	6.75336265563965	7.51285791397095	7.24216842651367	7.17226219177246	7.33134651184082	7.34050369262695	7.34958839416504	7.24509286880493	7.43215131759644	6.97118282318115									3	3	3	27.2	27.2	27.2	10.531	0	8.2766	250850000	13	0.494089	-0.140198	-0.727901	0.68107	-0.0587335	-0.435924	0.559766	-0.0906005	-0.617223	0.8017	0.0495977	0.262522	0.812198	-0.0318669	-0.25046	Q99N91
7.86793851852417	7.79111480712891	7.89720344543457	7.8072304725647	8.25248908996582	8.10930824279785	7.90425539016724	7.92790412902832	7.26581478118896	7.89672470092773	7.67300748825073	7.8161416053772	8.03374576568604	7.84833097457886	7.33998775482178									5	5	5	37.8	37.8	37.8	15.944	0	14.489	1060400000	34	0.0517167	0.207617	2.42208	0.205231	-0.229023	-1.45575	0.607136	-0.0813203	-0.542322	0.138287	-0.288938	-1.70912	0.554653	0.147703	0.632829	Q99N92
7.82087087631226	7.83363151550293	7.89292335510254	7.75791215896606	8.00065135955811	8.02555179595947	7.74837398529053	7.78009414672852	7.00289630889893	7.80955982208252	7.22808361053467	7.78203535079956	7.76883792877197	7.85407495498657	7.6106071472168									7	7	7	27.9	27.9	27.9	28.803	0	23.468	962140000	28	0.451523	0.0623333	0.805017	0.0652569	-0.479488	-2.35373	0.260335	-0.0724456	-1.24272	0.179286	-0.134779	-1.52015	0.110345	0.407042	1.93806	Q99N93
7.45175552368164	7.47801780700684	7.47571468353271	7.42647886276245	7.46828842163086	7.44123935699463	7.49750995635986	7.44825792312622	6.73814487457275	7.44343519210815	7.54882383346558	7.44502782821655	7.44709587097168	7.48713827133179	7.37988519668579									3	3	3	16.6	16.6	16.6	30.244	0	8.2447	373510000	11	0.749588	0.0058322	0.334218	0.360903	-0.214524	-1.00528	0.49824	-0.0182049	-0.720629	0.382694	-0.0240371	-0.94171	0.402115	0.196319	0.915102	Q99N94
8.16396617889404	8.35491466522217	8.20833396911621	8.22055244445801	8.76075458526611	8.68715381622314	8.04296875	8.305006980896	6.95221376419067	8.42920303344727	7.39868497848511	8.75527286529541	8.52723026275635	7.99403524398804	7.96221303939819									10	10	10	40.2	40.2	40.2	39.109	0	49.866	3359500000	43	0.266679	0.212029	1.22443	0.141708	-0.643575	-1.74348	0.730282	0.072746	0.361264	0.610253	-0.139283	-0.537513	0.159684	0.716321	1.65083	Q99N95
9.78659534454346	9.78626155853271	9.72600173950195	9.55594062805176	9.92479038238525	9.91701698303223	9.74328994750977	9.7404727935791	9.76201820373535	9.62217235565186	9.71508407592773	9.74459838867188	9.64107704162598	9.69058609008789	9.78931999206543									38	38	38	67.3	67.3	67.3	74.622	0	323.31	91063000000	490	0.168181	0.117693	1.5669	0.856165	-0.0139416	-0.190831	0.967411	0.00269556	0.0425892	0.108002	-0.114997	-1.88766	0.758963	0.0166372	0.324126	Q99NB1
8.72939205169678	8.61039352416992	8.52356433868408	8.56197166442871	8.56959629058838	8.70919322967529	8.77914905548096	8.79137516021729	8.19108772277832	8.27408885955811	8.67712306976318	8.30228805541992	8.72584629058838	8.53435611724854	8.42188358306885									7	7	7	55.2	55.2	55.2	13.36	0	167.2	5877600000	59	0.168703	0.105998	1.56464	0.15877	-0.225564	-1.65529	0.314923	-0.110237	-1.09646	0.0815633	-0.216235	-2.09031	0.515015	0.115327	0.700233	Q9CPP6
8.76984214782715	8.43770313262939	8.53137683868408	8.68644905090332	9.03586959838867	9.20422840118408	8.64312648773193	8.59463596343994	7.35224056243896	8.51221752166748	8.6848726272583	8.87520027160645	8.8354434967041	8.806960105896	8.38162040710449									6	6	6	52.6	52.6	52.6	8.4689	0	23.74	10855000000	102	0.165686	0.263122	1.57781	0.293968	-0.423233	-1.17208	0.421753	0.118463	0.862087	0.471699	-0.144659	-0.767859	0.208914	0.541696	1.44186	Q9CPQ1
7.87662172317505	7.25324106216431	7.39794015884399	7.00945091247559	7.86139106750488	7.90592527389526	7.57308053970337	7.70839548110962	7.13052654266357	7.40807008743286	7.39500761032104	7.23090839385986	7.75630140304565	7.46313095092773	7.30794525146484									3	3	3	31	31	31	15.537	0	79.325	667540000	41	0.104619	0.377885	1.91061	0.762384	-0.0731121	-0.319334	0.806987	0.055258	0.255341	0.0589742	-0.322627	-2.32586	0.450258	0.12837	0.81859	Q9CPQ3
9.2307300567627	9.04512691497803	9.11347579956055	8.94629001617432	9.36930847167969	9.50183963775635	9.34200763702393	9.05659961700439	9.45910549163818	9.08113098144531	8.8580379486084	9.16687393188477	8.98951625823975	9.32629489898682	9.41168689727783									8	8	8	55.3	55.3	55.3	11.424	0	71.629	29431000000	148	0.0803254	0.233533	2.10137	0.776354	0.0488524	0.299854	0.253483	0.139687	1.2629	0.503979	-0.0938458	-0.710643	0.641549	0.0908349	0.495051	Q9CPQ8
8.51162910461426	8.52297878265381	8.60824775695801	8.55648326873779	8.87323951721191	8.949951171875	8.58468151092529	8.61796474456787	7.14579105377197	8.67129325866699	8.47690391540527	8.65120029449463	8.70517063140869	8.66970729827881	8.2146053314209									18	18	18	70.8	70.8	70.8	33.541	0	79.65	6104500000	156	0.0696508	0.206625	2.20469	0.311975	-0.451839	-1.12422	0.932904	0.0103362	0.0877854	0.23114	-0.196288	-1.33226	0.32524	0.462175	1.09049	Q9CPR5
7.79857492446899	7.83813095092773	7.81768417358398	7.74502801895142	7.294677734375	7.91186046600342	7.72329950332642	7.58092498779297	7.81615495681763	7.66089391708374	7.22081422805786	6.65451049804688	6.75034523010254	6.99320840835571	7.65111303329468			+	mU1 NR_WT					1	1	1	8.6	8.6	8.6	11.967	0.0023364	5.1038	832390000	15	0.238619	-0.172164	-1.30841	0.182147	-0.2339	-1.54866	0.0129288	-0.78756	-3.49346	0.0554067	-0.615396	-2.37151	0.1289	-0.55366	-1.81704	Q9CPU2
9.49316501617432	9.39499378204346	9.58803653717041	9.67221832275391	9.11257171630859	9.32457065582275	9.5393648147583	9.57622623443604	9.43849468231201	9.41838455200195	9.43466472625732	9.58434295654297	9.30241775512695	9.2162446975708	9.45674514770508									8	8	8	74.5	74.5	74.5	16.958	0	214.52	28619000000	180	0.271108	-0.14892	-1.21189	0.193573	-0.106589	-1.50133	0.196378	-0.147166	-1.45324	0.990044	0.00175428	0.0130063	0.692477	-0.040577	-0.419191	Q9CPU4
8.34863567352295	8.14721202850342	8.24472236633301	8.05629444122314	7.09996604919434	6.55285263061523	8.3811149597168	8.5197229385376	8.69667053222656	8.34736919403076	7.90902853012085	8.30960845947266	8.0977087020874	8.59189891815186	8.58517837524414									12	12	12	42.6	42.6	42.6	33.316	0	74.237	3141200000	43	0.29318	-0.560802	-1.15191	0.587778	0.118473	0.578863	0.19451	0.196882	1.46028	0.178419	0.757684	1.5237	0.754343	0.0784092	0.330611	Q9CPV4
7.6143274307251	7.88240480422974	7.59167671203613	7.38442516326904	7.66143417358398	7.5770092010498	7.56806087493896	7.78535127639771	7.04996252059937	7.65733337402344	7.42541408538818	7.47497320175171	7.48172903060913	7.40091753005981	7.46762275695801					+	mU1 NR_WT NR			3	3	3	28.1	28.1	28.1	15.192	0	8.2368	736450000	14	0.802624	0.0297554	0.261266	0.263557	-0.240639	-1.25916	0.169945	-0.161898	-1.55928	0.0118446	-0.191653	-3.56576	0.621371	0.0787406	0.526007	Q9CPX7
7.93667936325073	8.0769681930542	7.94221639633179	7.9518666267395	7.73045921325684	7.52692031860352	7.95485019683838	7.87605619430542	6.34983491897583	7.85176563262939	7.57238817214966	7.68943309783936	7.81967544555664	7.81158828735352	7.55187654495239			+	mU1 NR_WT					4	4	4	32.8	32.8	32.8	15.103	0	12.781	963310000	22	0.0859101	-0.204861	-2.05279	0.122999	-0.718936	-1.85347	0.0109575	-0.258789	-3.63059	0.650426	-0.0539281	-0.476722	0.294387	0.460147	1.17094	Q9CPY1
8.61008453369141	8.72988510131836	8.73315715789795	8.69531536102295	8.63370037078857	8.51252460479736	8.66473579406738	8.74677467346191	9.11045455932617	8.68729686737061	8.8325023651123	8.72517585754395	8.59724521636963	8.72011756896973	8.99664783477783									19	19	19	51.4	51.4	51.4	56.141	0	112.88	9322400000	166	0.38624	-0.0526767	-0.934231	0.151829	0.184641	1.68996	0.475965	0.0676861	0.760147	0.262272	0.120363	1.23709	0.453632	-0.116955	-0.812127	Q9CPY7
6.75862121582031	6.85610914230347	6.63164663314819	6.87209415435791	6.78827333450317	6.54140663146973	7.10078382492065	6.63847923278809	6.97330808639526	7.19766473770142	7.45085716247559	6.71358013153076	7.06141090393066	6.96375465393066	7.19252014160156		+		mU1_WT					2	2	2	15.1	15.1	15.1	12.552	0.0061856	3.1553	78245000	5	0.929474	-0.012382	-0.0922874	0.0233848	0.427659	3.2231	0.128688	0.203199	1.76116	0.223217	0.215581	1.3583	NaN	0	NaN	Q9CPZ8
7.73209619522095	7.10712957382202	7.98517513275146	7.67384099960327	8.11776828765869	8.28551197052002	7.7657208442688	7.86664772033691	7.36995315551758	7.96457052230835	8.35692405700684	7.78166913986206	8.13203525543213	7.83353614807129	7.47790241241455									3	3	3	29.7	29.7	29.7	11.344	0	15.49	1097900000	28	0.130872	0.384352	1.749	0.43993	0.272589	0.838602	0.456918	0.181725	0.794967	0.300006	-0.202626	-1.13414	0.764844	-0.0908635	-0.315893	Q9CQ00
7.50812530517578	7.35456943511963	7.68343448638916	6.83399629592896	7.91347455978394	7.93279838562012	7.10937595367432	7.35934209823608	7.51397609710693	6.73208236694336	7.82405996322632	7.57474851608276	7.94649171829224	7.93355321884155	7.14632511138916									4	4	4	28.3	28.3	28.3	14.164	0	11.511	669600000	16	0.428167	0.233716	0.849547	0.974507	0.0116748	0.0335864	0.289875	0.305248	1.16064	0.806157	0.0715319	0.256468	0.442066	0.293573	0.834434	Q9CQ54
9.80338191986084	9.82102870941162	9.82643795013428	9.52597713470459	9.52173900604248	9.56788444519043	9.64965629577637	9.74003887176514	10.0627326965332	9.70807266235352	9.35198974609375	9.70951557159424	9.59902000427246	9.66403007507324	9.85659027099609									27	27	27	74.6	74.6	74.6	36.213	0	323.31	92793000000	386	0.204103	-0.124377	-1.42475	0.856374	-0.0366081	-0.190549	0.699479	-0.0369174	-0.405061	0.27471	0.0874593	1.20183	0.99872	-0.000309388	-0.00168648	Q9CQ62
8.59216594696045	8.25683784484863	8.24595642089844	8.2944221496582	8.40837574005127	8.55008125305176	8.48115539550781	8.34293556213379	7.79006671905518	7.93062829971313	8.15415000915527	8.41153526306152	8.28616428375244	8.33120441436768	8.20395755767822		+		mU1_WT			+	mU1 NR_mU1	4	4	4	36.6	36.6	36.6	9.7681	0	12.988	3215900000	28	0.334496	0.0982914	1.0492	0.031719	-0.389064	-2.95452	0.688561	-0.0391302	-0.420794	0.0697483	-0.137422	-2.20367	0.0189345	0.349934	3.41529	Q9CQ69
8.12846374511719	7.90965747833252	8.02596092224121	8.0764217376709	8.123459815979	8.17669868469238	7.95679712295532	7.95678281784058	7.61496067047119	7.84652900695801	7.93922472000122	8.17932224273682	7.99395608901978	8.24184513092041	7.97398614883423							+	mU1 NR_mU1	6	6	6	42.4	42.4	42.4	10.916	0	20.828	1755500000	52	0.811869	0.0183086	0.248724	0.0615427	-0.234888	-2.40103	0.474724	0.0621514	0.762385	0.634916	0.0438428	0.499946	0.0465046	0.297039	2.63051	Q9CQ75
7.72745180130005	7.77393245697021	7.88082504272461	7.64682483673096	6.76575756072998	6.97717094421387	7.79480171203613	7.74308633804321	7.68117809295654	7.856614112854	7.3374400138855	7.9507007598877	6.8107967376709	7.43670320510864	6.92725896835327									2	2	2	18.1	18.1	18.1	18.865	0.0012706	6.5704	723680000	17	0.153231	-0.437054	-1.63469	0.388604	-0.132181	-0.943807	0.123545	-0.475894	-1.79063	0.919949	-0.0388392	-0.104801	0.351145	-0.343712	-1.02786	Q9CQ89
8.03873920440674	8.10105895996094	8.26923274993896	8.17078971862793	8.53930187225342	8.28862953186035	8.02743148803711	8.04688549041748	6.8147931098938	8.09992218017578	7.13324403762817	8.26069164276123	8.19228839874268	8.29933261871338	7.96781015396118									2	2	2	50	50	50	9.3308	0.001227	6.1419	2227300000	15	0.558127	0.0806069	0.619882	0.0599839	-0.795635	-2.4218	0.707411	0.0350755	0.393702	0.758175	-0.0455314	-0.322279	0.0558425	0.830711	2.47998	Q9CQ91
7.68927335739136	7.58083391189575	7.63800954818726	7.56544637680054	7.80900049209595	7.86137294769287	7.82995319366455	7.82405424118042	7.36821269989014	7.61371517181396	7.46369886398315	7.78046846389771	8.1425142288208	7.67905521392822	7.85586404800415	+			WT NR_WT			+	mU1 NR_mU1	3	3	3	24.3	24.3	24.3	17.008	0	28.312	807670000	39	0.000423349	0.212704	7.00041	0.102979	-0.136515	-1.99206	0.0548716	0.246085	2.37862	0.750158	0.0333803	0.333423	0.0338888	0.3826	2.89751	Q9CQ92
9.81681156158447	9.78481006622314	9.62578582763672	9.73162937164307	9.64311695098877	9.73795509338379	9.49927425384521	9.49459934234619	9.90539073944092	9.70977878570557	9.46790409088135	9.70470809936523	9.39840888977051	9.75060844421387	9.81326770782471									26	26	26	67.4	67.4	67.4	31.814	0	323.31	83196000000	439	0.0905097	-0.146023	-2.01512	0.713657	-0.0454013	-0.388472	0.497891	-0.0730109	-0.721238	0.52978	0.0730119	0.666652	0.862987	-0.0276096	-0.181657	Q9CQA3
8.26885890960693	8.19972801208496	8.03442764282227	8.05990409851074	8.2089786529541	8.18856334686279	7.88369560241699	7.85380172729492	7.91341638565063	7.94297981262207	8.0116548538208	7.85906028747559	8.19223308563232	8.05115222930908	7.79469728469849		+		mU1_WT					6	6	6	53.5	53.5	53.5	15.081	0	15.853	1750800000	35	0.371584	-0.10697	-0.965494	0.047461	-0.184713	-2.61363	0.169863	-0.166444	-1.55964	0.667703	-0.0594741	-0.451187	0.874783	0.0182687	0.165836	Q9CQC7
7.55482816696167	7.89580345153809	7.85663843154907	7.72605848312378	7.89343452453613	7.92733430862427	7.46802234649658	7.55881643295288	6.95596742630005	7.89596366882324	7.60442876815796	7.39755773544312	7.43687772750854	7.78339624404907	7.39898109436035									5	5	5	30.7	30.7	30.7	20.68	0	13.048	768010000	24	0.750465	-0.0464302	-0.332995	0.324148	-0.272879	-1.09322	0.0806189	-0.254129	-2.09873	0.213363	-0.207699	-1.39188	0.944758	0.0187499	0.0728398	Q9CQF0
7.3910231590271	7.42836141586304	7.39660024642944	7.03935194015503	6.89858961105347	6.9799690246582	6.37821245193481	7.38555288314819	7.86964797973633	7.40284585952759	7.63044548034668	7.37535285949707	6.92477178573608	7.3899097442627	7.51973628997803									3	3	3	14.6	14.6	14.6	27.847	0	27.996	350630000	5	0.125215	-0.403253	-1.78093	0.096095	0.320479	2.0463	0.945277	-0.0113915	-0.0715609	0.159979	0.391862	1.60335	0.142335	-0.33187	-1.74005	Q9CQF4
7.43686199188232	7.3891658782959	7.77019643783569	7.62690448760986	6.92240476608276	7.60997819900513	7.80105352401733	7.85179615020752	7.49112367630005	7.70668363571167	7.73084402084351	6.99634742736816	6.73877954483032	7.75982666015625	7.66322946548462									6	6	6	21	21	21	56.494	0	16.02	570120000	16	0.968717	-0.00947404	-0.0408815	0.507504	0.0871016	0.713399	0.353932	-0.266236	-1.00446	0.465252	-0.256762	-0.779609	0.295612	-0.353338	-1.1676	Q9CQF9
8.24400520324707	7.88579082489014	7.83366966247559	6.90583086013794	7.86527585983276	7.87692737579346	7.96028518676758	8.01782608032227	8.29225635528564	6.66051006317139	7.9151782989502	7.70659828186035	7.93521976470947	7.76863050460815	7.83712100982666									2	2	2	14.3	14.3	14.3	21.71	0	11.284	1400700000	22	0.48756	0.212754	0.739422	0.866053	-0.0946759	-0.177539	0.755126	0.0945683	0.326512	0.100154	-0.118186	-1.94207	0.668769	0.189244	0.45413	Q9CQH3
8.1105899810791	7.96106004714966	7.98515224456787	7.9744701385498	7.86300134658813	8.01807594299316	7.92605924606323	7.86130142211914	8.24385643005371	7.78012990951538	7.52274131774902	7.95578384399414	7.76394414901733	8.11637496948242	7.95354223251343									6	6	6	44.7	44.7	44.7	21.984	0	63.817	1501800000	33	0.123031	-0.0907086	-1.79364	0.420663	-0.158909	-0.876912	0.47848	-0.0604068	-0.755622	0.72103	0.0303018	0.374331	0.636688	0.0985021	0.502458	Q9CQJ8
8.00949382781982	8.05937385559082	8.24472236633301	7.78082132339478	7.62601184844971	7.73594999313354	7.94304418563843	7.94796752929688	6.82778787612915	8.15286922454834	7.48055791854858	7.79150104522705	7.4103217124939	7.74201774597168	7.7095160484314			+	mU1 NR_WT					3	3	3	21.5	21.5	21.5	17.595	0	11.263	1111800000	13	0.141471	-0.210359	-1.69263	0.174747	-0.536531	-1.58087	0.0309971	-0.360264	-2.80407	0.248073	-0.149904	-1.27918	0.622113	0.176267	0.524858	Q9CQL4
8.7820348739624	8.79017925262451	8.80313587188721	8.79761409759521	8.93162536621094	8.86018180847168	8.83328723907471	8.85206508636475	8.88332653045654	8.77539920806885	8.3458833694458	8.86921405792236	8.84958553314209	8.93344211578369	8.90720176696777	+		+	mU1 NR_WT;WT NR_WT					27	27	27	52.8	52.8	52.8	80.208	0	194.06	10428000000	159	0.0135479	0.0760489	3.45512	0.404666	-0.125038	-0.909767	0.00247887	0.0966198	4.9892	0.498905	0.020571	0.719469	0.17199	0.221658	1.59322	Q9CQN1
8.61342906951904	8.51839542388916	8.35585403442383	8.29342842102051	7.95536518096924	8.10016345977783	8.25408840179443	8.09988784790039	8.08432579040527	8.37471199035645	9.1723690032959	7.96092700958252	7.99568367004395	8.08386039733887	8.40212345123291	+		+	mU1 NR_WT;WT NR_WT					3	3	3	41.2	41.2	41.2	11.642	0	16.462	4323000000	102	0.011467	-0.342901	-3.59267	0.744208	0.0985255	0.344895	0.0361532	-0.334628	-2.68791	0.946205	0.00827241	0.0703454	0.204536	-0.433154	-1.45839	Q9CQN6
7.57881116867065	7.49825525283813	7.68546390533447	7.4340500831604	7.68570613861084	7.19364070892334	7.57965803146362	7.57327795028687	6.67143106460571	7.64563846588135	7.888512134552	7.46005535125732	6.84359169006348	7.63324642181396	6.71662950515747									3	3	3	23.7	23.7	23.7	15.261	0	8.3994	461150000	14	0.745419	-0.0410744	-0.340034	0.662408	-0.147285	-0.463612	0.147432	-0.385764	-1.66271	0.217284	-0.34469	-1.37836	0.585979	-0.23848	-0.581745	Q9CQN7
9.03992938995361	8.92584323883057	8.72819995880127	8.91141891479492	9.25796604156494	9.41549110412598	8.8742733001709	8.8725528717041	9.57627201080322	8.69252967834473	9.33937168121338	9.09708404541016	9.23628520965576	9.12404727935791	9.31026840209961			+	mU1 NR_WT					23	23	23	64.5	64.5	64.5	28.948	0	204.12	26428000000	275	0.228458	0.203723	1.34099	0.253736	0.301377	1.28923	0.0117726	0.290573	3.57082	0.574287	0.0868504	0.593876	0.964143	-0.0108032	-0.0472498	Q9CQQ7
10.045126914978	10.0255517959595	10.1128063201904	9.89895534515381	9.89700031280518	9.92115020751953	10.1860513687134	10.1064968109131	10.1066331863403	10.0060377120972	10.1309766769409	10.1298828125	9.93571853637695	10.1620264053345	10.1062593460083									18	18	18	94.3	94.3	94.3	15.183	0	323.31	195430000000	620	0.935319	0.00706458	0.0846169	0.371542	0.0606058	0.981229	0.387342	0.0628617	0.931918	0.544071	0.0557971	0.642882	0.974759	0.00225592	0.033253	Q9CQR4
6.64216756820679	6.74472332000732	6.72096109390259	6.85863351821899	7.49272537231445	7.24625015258789	7.11854076385498	6.75392246246338	7.09412145614624	6.82058048248291	8.75382804870605	6.67940330505371	6.84130668640137	7.33717250823975	7.03306150436401	+			WT NR_WT					3	3	3	12.7	12.7	12.7	46.224	0	14.47	159960000	5	0.04265	0.411238	2.56449	0.169818	0.814555	1.60309	0.170059	0.231115	1.55879	0.421947	-0.180124	-0.861706	0.323017	-0.583441	-1.09606	Q9CQS4
8.25112724304199	8.08781719207764	7.98093938827515	8.15424156188965	8.40115928649902	8.31221961975098	8.30911922454834	8.2962703704834	8.38976860046387	7.98354530334473	7.8431830406189	8.36548805236816	8.45348644256592	8.37544441223145	8.16028881072998	+		+	mU1 NR_WT;WT NR_WT					6	6	6	58.9	58.9	58.9	16.318	0	54.174	2747800000	36	0.0141039	0.211161	3.4223	0.773647	-0.0463657	-0.303618	0.0404769	0.220146	2.6034	0.897857	0.0089848	0.133904	0.147978	0.266511	1.70989	Q9CQX2
8.71982002258301	8.55923652648926	8.54156684875488	8.47080707550049	8.79531669616699	8.66861915588379	8.56817817687988	8.60518646240234	8.6079158782959	8.58990478515625	7.51402711868286	8.78769397735596	8.65983104705811	8.75509738922119	8.47509002685547									3	3	3	56.9	56.9	56.9	11.101	0	43.317	6555400000	38	0.277754	0.0864675	1.19341	0.326926	-0.335575	-1.08628	0.313196	0.0965705	1.10075	0.910443	0.010103	0.11731	0.22692	0.432146	1.37717	Q9CQX8
9.40114212036133	9.49648666381836	9.30623149871826	9.27795314788818	9.13389015197754	9.20905876159668	9.1540584564209	9.16764259338379	8.90459632873535	9.21793079376221	9.10143756866455	9.13953304290771	8.87717533111572	9.27831935882568	9.10893726348877	+	+	+	mU1 NR_WT;mU1_WT;WT NR_WT					8	8	8	55.7	55.7	55.7	15.283	0	90.465	28924000000	107	0.00777259	-0.204291	-3.92328	0.027844	-0.295798	-3.0681	0.03192	-0.269462	-2.78183	0.470901	-0.0651712	-0.769308	0.841051	0.0263364	0.211225	Q9CQZ5
8.59349632263184	8.45862293243408	8.30614566802979	8.40114212036133	8.57982921600342	8.55486488342285	8.38086223602295	8.39348793029785	7.70371246337891	8.3089485168457	8.31571865081787	8.45768547058105	8.5490894317627	8.47823429107666	8.1229362487793									5	5	5	42.3	42.3	42.3	11.692	0	26.6	4100400000	62	0.655295	0.0374093	0.469491	0.132563	-0.330392	-1.79527	0.747801	-0.0378654	-0.33671	0.513787	-0.0752747	-0.69375	0.210326	0.292526	1.4366	Q9CQZ6
7.1438889503479	7.28422784805298	7.1709361076355	7.38336658477783	7.10786771774292	7.1885871887207	7.14767646789551	6.95857810974121	6.34185600280762	6.8368558883667	7.71794414520264	6.52197551727295	7.10805749893188	6.95413398742676	7.29167938232422									3	3	3	25.7	25.7	25.7	12.694	0	11.021	219780000	11	0.0996401	-0.144928	-1.94578	0.451278	-0.280053	-0.816633	0.161287	-0.276643	-1.59742	0.472056	-0.131716	-0.767213	0.993341	0.00340958	0.00877133	Q9CR13
8.37145614624023	8.52107238769531	8.50973987579346	8.40091800689697	8.73216819763184	8.60864353179932	8.53359413146973	8.47725105285645	8.55689334869385	8.44904613494873	7.918381690979	8.5464563369751	8.71158790588379	8.65976428985596	8.45940780639648									5	5	5	23.7	23.7	23.7	17.37	0	38.909	6200400000	69	0.0861185	0.137118	2.05104	0.442236	-0.14269	-0.834104	0.0798179	0.143507	2.10595	0.938194	0.00638986	0.080846	0.169162	0.286197	1.60609	Q9CR21
7.79780769348145	7.96300840377808	8.02571582794189	7.81251239776611	7.36971664428711	7.23882341384888	7.84957933425903	7.79309177398682	8.4848690032959	7.87959480285645	7.42085456848145	7.78672313690186	7.39550113677979	7.53295803070068	8.25700664520264									4	4	4	23.3	23.3	23.3	23.252	0	22.359	1404600000	33	0.0829107	-0.336958	-2.07846	0.918406	0.0286784	0.107722	0.458075	-0.156714	-0.792824	0.486226	0.180244	0.741789	0.610705	-0.185392	-0.542602	Q9CR24
6.40272903442383	6.98040342330933	7.31118154525757	6.89273738861084	7.54599952697754	7.53043031692505	7.33959054946899	7.27875375747681	6.61548757553101	7.4628472328186	7.25962829589844	7.45432662963867	7.53996658325195	7.25751066207886	7.10534000396729	+			WT NR_WT					2	2	2	11.7	11.7	11.7	25.82	0.0012484	6.2994	273790000	10	0.0384264	0.526931	2.64222	0.514882	0.215892	0.700466	0.0815492	0.442523	2.09044	0.504056	-0.0844076	-0.71051	0.393903	0.226632	0.932454	Q9CR59
10.2831430435181	10.2550315856934	10.287353515625	10.3263969421387	10.1771612167358	10.2503709793091	10.373628616333	10.2958965301514	10.1740598678589	10.2533140182495	10.6449308395386	10.2228727340698	10.1722230911255	10.348090171814	10.2736263275146									38	38	38	89.5	89.5	89.5	34.155	0	323.31	292640000000	872	0.764282	-0.0137169	-0.31382	0.596734	0.0694536	0.564599	0.433943	-0.0337782	-0.838372	0.731081	-0.0200613	-0.360139	0.461918	-0.103232	-0.796407	Q9CR62
10.2841596603394	10.165244102478	10.1295614242554	10.1305589675903	10.1645612716675	10.209997177124	10.2171678543091	10.2134380340576	9.4814281463623	10.1434831619263	10.2702827453613	10.1882247924805	10.1529302597046	10.1497735977173	9.99012088775635									30	30	30	79.2	79.2	79.2	29.367	0	323.31	226760000000	722	0.558116	0.02391	0.6199	0.356603	-0.212316	-1.01517	0.358024	-0.0571187	-0.995291	0.128174	-0.0810287	-1.76406	0.495467	0.155198	0.734783	Q9CR68
8.84808444976807	8.78478813171387	8.69417476654053	8.65245914459229	9.02329349517822	9.02023696899414	8.79444599151611	8.74793243408203	8.5421028137207	8.63235569000244	8.58588886260986	8.78019523620605	8.9373025894165	8.98075294494629	8.61349296569824		+		mU1_WT					11	11	11	77.1	77.1	77.1	18.314	0	48.279	9198200000	116	0.125707	0.151601	1.7781	0.0382347	-0.158094	-2.79464	0.41278	0.0830593	0.879869	0.559088	-0.0685413	-0.618322	0.0627971	0.241153	2.38472	Q9CRB8
8.05705738067627	7.84004974365234	7.80679035186768	7.74530124664307	8.17283630371094	8.34688091278076	8.01254177093506	8.0019063949585	8.14116764068604	7.77539205551147	7.56009721755981	8.08997535705566	8.23269081115723	7.93700122833252	7.73851871490479	+			WT NR_WT					5	5	5	29.1	29.1	29.1	26.334	0	41.724	1680800000	42	0.0426385	0.271242	2.56469	0.830579	-0.0367474	-0.225416	0.316985	0.137247	1.09137	0.353996	-0.133995	-1.00432	0.400206	0.173994	0.91911	Q9CRB9
7.86486101150513	7.58222246170044	7.61167001724243	7.52770709991455	7.3994312286377	7.51108074188232	7.76356267929077	7.64484214782715	7.97025394439697	7.66981887817383	7.49168109893799	7.62338352203369	7.5873966217041	7.1902756690979	7.85116052627563									4	4	4	27.9	27.9	27.9	27.61	0	53.114	862590000	26	0.561745	-0.0668859	-0.614019	0.680725	0.0639695	0.436433	0.612242	-0.0835611	-0.534453	0.91964	-0.0166751	-0.105208	0.494078	-0.147531	-0.737273	Q9CRD0
6.86877250671387	6.69688177108765	7.83782196044922	7.6085901260376	6.89235496520996	6.82478523254395	6.96180391311646	7.86146259307861	7.75888919830322	7.86897325515747	7.32206201553345	6.83279991149902	7.74684429168701	6.77084302902222	6.76664018630981									5	5	5	21.9	21.9	21.9	34.139	0	13.191	790370000	8	0.760443	-0.117915	-0.319135	0.316811	0.396958	1.11178	0.564272	-0.223735	-0.60994	0.767355	-0.10582	-0.309574	0.106822	-0.620693	-1.9634	Q9CWD8
7.53232097625732	7.47096872329712	7.47686052322388	7.4967360496521	7.40394353866577	7.02897787094116	7.4301233291626	7.56789636611938	7.60448503494263	7.47285890579224	7.58183670043945	7.49294185638428	7.37014293670654	7.26660776138306	7.59227657318115									4	4	4	13.8	13.8	13.8	48.384	0	20.999	452280000	15	0.284523	-0.136486	-1.17496	0.179674	0.0588386	1.55928	0.412501	-0.0637293	-0.880427	0.610519	0.072757	0.537104	0.234408	-0.122568	-1.35168	Q9CWG8
7.38758563995361	7.36674022674561	7.29957246780396	6.50886917114258	6.91108369827271	6.33557367324829	6.97433376312256	7.24980974197388	6.92008304595947	7.30586719512939	7.55820322036743	7.57708930969238	7.00858116149902	6.50644731521606	6.90010499954224									5	5	5	19.2	19.2	19.2	37.809	0	27.796	292120000	10	0.376081	-0.272992	-0.9558	0.69884	0.120693	0.409915	0.657498	-0.142636	-0.466229	0.671829	0.130355	0.445138	0.426275	-0.263329	-0.865616	Q9CWX2
8.4105920791626	8.61915588378906	8.58631706237793	8.45893955230713	8.74302387237549	8.68047142028809	8.51601982116699	8.55013084411621	8.09684085845947	8.66545009613037	8.274827003479	8.45446395874023	8.75437927246094	8.43402576446533	8.19404220581055									8	8	8	35.8	35.8	35.8	37.335	0	58.154	4711600000	63	0.206759	0.10366	1.41519	0.307701	-0.173045	-1.13536	0.651227	-0.0595233	-0.475531	0.245118	-0.163184	-1.28821	0.586474	0.113522	0.580951	Q9CXI0
7.60950899124146	7.72389078140259	7.96360349655151	7.90547227859497	7.88632154464722	7.85522222518921	7.73032188415527	7.5770435333252	8.02069282531738	7.85352182388306	7.91220617294312	7.65775346755981	7.56409788131714	7.70582962036133	7.89968395233154									10	10	10	26.2	26.2	26.2	58.326	0	30.484	1050600000	22	0.733814	-0.0383916	-0.356295	0.276247	0.128188	1.22178	0.418556	-0.0937777	-0.868389	0.598698	-0.0553861	-0.555406	0.062924	-0.221966	-2.38309	Q9CXJ1
9.1556396484375	9.11119556427002	9.14063358306885	9.09684085845947	9.248610496521	9.2367639541626	9.27779293060303	9.31386756896973	8.76509475708008	9.14085388183594	9.2677116394043	9.20666408538818	9.24963855743408	9.13213157653809	9.12791442871094	+			WT NR_WT	+	mU1 NR_WT NR			38	38	38	57.7	57.7	57.7	77.999	0	265.08	19816000000	235	0.000598241	0.143181	6.56553	0.61502	-0.0681907	-0.535868	0.154658	0.0530097	1.62796	0.0390612	-0.0901716	-2.62997	0.397478	0.1212	0.924866	Q9CXJ4
8.48274517059326	8.53890037536621	8.54171657562256	8.45181751251221	8.54677677154541	8.50807189941406	8.58660984039307	8.64677619934082	8.97193908691406	8.48698234558105	7.28966522216797	8.58893203735352	8.61237049102783	8.67254161834717	8.83419132232666			+	mU1 NR_WT					19	18	18	47.9	46.4	46.4	54.614	0	164.56	6471500000	115	0.113829	0.0682638	1.84975	0.570529	-0.254266	-0.606718	0.0269326	0.173214	2.91136	0.145236	0.10495	1.67359	0.358959	0.42748	1.00974	Q9CXT8
8.5852575302124	8.50101852416992	8.2898120880127	8.76204013824463	7.96066093444824	8.07896423339844	8.33166980743408	8.05403804779053	8.81071662902832	8.27946186065674	9.81993198394775	8.16705131530762	7.91157293319702	8.10564613342285	8.55165767669678	+			WT NR_WT					4	4	4	27.7	27.7	27.7	17.014	0	32.514	7090600000	79	0.0145744	-0.428199	-3.39562	0.320865	0.435505	1.10148	0.0793516	-0.35055	-2.11019	0.635958	0.0776488	0.498377	0.113291	-0.786055	-1.9175	Q9CXV1
7.78441047668457	7.60881471633911	7.84272146224976	8.02015399932861	7.67208862304688	7.35376262664795	7.45161771774292	7.59086418151855	6.95815563201904	7.63584566116333	7.83307218551636	7.55521535873413	7.39693117141724	7.60278701782227	7.50886631011963	+		+	mU1 NR_WT;WT NR_WT					4	4	4	17	17	17	41.192	0	15.161	612260000	14	0.0362764	-0.296942	-2.68536	0.223114	-0.338334	-1.39043	0.0206116	-0.298075	-3.11898	0.989615	-0.00113332	-0.0135678	0.866615	0.0402588	0.176785	Q9CXW2
9.35098457336426	9.30892753601074	9.23824691772461	9.18292808532715	9.13554573059082	9.21386337280273	9.41505718231201	9.44607067108154	8.42813491821289	9.29422378540039	9.08514785766602	9.29563331604004	9.24293899536133	9.32680702209473	9.20566463470459									10	10	10	57.7	57.7	57.7	19.784	0	88.646	25948000000	102	0.714918	0.0323625	0.383005	0.193497	-0.334436	-1.50163	0.958249	-0.00251079	-0.0545751	0.679974	-0.0348732	-0.433252	0.192798	0.331925	1.50445	Q9CXZ1
7.68987703323364	7.64008378982544	7.84403562545776	7.60286283493042	7.44371652603149	7.45464658737183	7.87059688568115	6.44329118728638	7.11894607543945	7.5500693321228	7.16696071624756	7.84526538848877	7.56323194503784	7.78740358352661	7.62445735931396		+		mU1_WT			+	mU1 NR_mU1	4	4	4	20.4	20.4	20.4	37.527	0	17.705	600300000	13	0.251016	-0.391152	-1.27029	0.024245	-0.415556	-3.19074	0.902429	0.0108747	0.127872	0.243024	0.402027	1.29467	0.027585	0.426431	3.07631	Q9CY73
7.55533647537231	6.75778770446777	7.28449821472168	7.08041000366211	7.05459451675415	6.81423568725586	7.16767168045044	7.31695508956909	7.20175218582153	7.15821170806885	7.61809301376343	7.16277360916138	7.15219640731812	7.26789903640747	7.08710670471191									2	2	2	11.5	11.5	11.5	24.394	0.0044593	4.0552	225450000	3	0.69735	-0.0811439	-0.40812	0.532854	0.156511	0.669485	0.991053	-0.00201416	-0.0116884	0.507853	0.0791297	0.703943	0.278307	-0.158525	-1.21586	Q9CYH2
7.87937116622925	7.62453985214233	7.85347938537598	7.5685887336731	7.64057064056396	7.09408664703369	7.59841823577881	7.65764856338501	8.02382850646973	7.92366361618042	7.59465551376343	7.29426765441895	7.696120262146	7.37079048156738	7.75929021835327									5	5	5	34.2	34.2	34.2	17.319	0	73.146	859790000	39	0.1857	-0.233814	-1.49437	0.454863	0.115888	0.809778	0.200873	-0.201378	-1.43654	0.861393	0.0324361	0.182244	0.129241	-0.317265	-1.81499	Q9CYR0
10.4655466079712	10.3770332336426	10.3055877685547	10.1696157455444	10.1770458221436	10.1878871917725	10.2610244750977	10.3245086669922	9.97549629211426	10.1553659439087	9.96331596374512	10.2955894470215	10.2063398361206	10.3939085006714	10.1880559921265		+		mU1_WT			+	mU1 NR_mU1	33	33	32	63.1	63.1	61.7	52.851	0	323.31	290290000000	640	0.245686	-0.0918293	-1.28647	0.0215365	-0.298053	-3.29742	0.48372	-0.0584724	-0.746247	0.588994	0.0333569	0.570587	0.0256667	0.239581	3.13999	Q9CZ13
8.57147598266602	8.53734016418457	8.63649749755859	8.3812952041626	8.75801849365234	8.60775470733643	8.82832431793213	8.80382537841797	8.91578006744385	8.46883487701416	8.24642467498779	8.69269752502441	8.74372959136963	8.6626443862915	8.75916194915771	+		+	mU1 NR_WT;WT NR_WT					11	11	11	49.6	49.6	49.6	36.717	0	112.76	7272900000	97	0.024955	0.217829	2.97008	0.948371	0.0120277	0.0680664	0.0205755	0.182906	3.12036	0.543697	-0.0349224	-0.643498	0.352567	0.170878	1.02454	Q9CZ42
9.31862640380859	9.25076103210449	9.27443504333496	9.16870403289795	9.23927402496338	9.52841567993164	9.16280364990234	9.22463703155518	9.47535133361816	9.18075656890869	8.94309329986572	9.31058692932129	9.03108501434326	9.60002517700195	9.49393177032471									9	9	9	39.1	39.1	39.1	18.382	0	83.942	34575000000	176	0.697611	0.035651	0.407745	0.706857	-0.0533979	-0.398287	0.441793	0.105776	0.82336	0.654297	0.0701246	0.470971	0.453047	0.159173	0.813245	Q9CZB0
6.30900001525879	6.86787366867065	6.68815326690674	6.83075094223022	6.9128885269165	6.92825651168823	6.4450306892395	6.8730297088623	8.40277671813965	7.25801420211792	7.85678434371948	7.55698680877686	6.85108757019043	6.42885208129883	7.73192691802979		+		mU1_WT					8	8	8	13.6	13.6	13.6	81.877	0	26.391	518550000	13	0.526044	0.115857	0.672934	0.014036	1.16525	3.69749	0.206033	0.468269	1.41779	0.320906	0.352412	1.08177	0.18558	-0.696978	-1.53414	Q9CZD3
9.00017356872559	8.9817419052124	9.07353496551514	9.07151412963867	9.01114749908447	8.85199165344238	9.03470897674561	9.12671566009521	9.73434352874756	9.11367607116699	8.87484073638916	9.05472755432129	8.83498668670654	9.09509944915771	9.5757999420166									28	28	28	66.1	66.1	66.1	55.758	0	215.4	25665000000	247	0.693522	-0.0256002	-0.413631	0.377564	0.209212	0.967864	0.517901	0.108412	0.686728	0.450764	0.134012	0.806437	0.736136	-0.1008	-0.35633	Q9CZN7;P50431
7.76213073730469	7.7877368927002	7.70371246337891	8.06759166717529	7.6737117767334	6.93548154830933	7.73901844024658	7.8285436630249	7.89625597000122	7.75473833084106	7.54547739028931	7.90101671218872	7.65788745880127	7.84097766876221	7.77065324783325									5	5	5	13.5	13.5	13.5	56.782	0	14.779	924950000	23	0.242625	-0.286104	-1.2959	0.47884	-0.0981357	-0.764934	0.709544	-0.0376592	-0.390658	0.285459	0.248445	1.17244	0.590562	0.0604765	0.574415	Q9CZN8
7.47539520263672	7.68832206726074	7.5287880897522	7.43714761734009	7.2016429901123	6.90596294403076	7.47076320648193	7.5851674079895	8.40796852111816	7.34766149520874	7.39162302017212	7.18241453170776	7.38008451461792	7.44252681732178	7.98781824111938									8	8	8	30.4	30.4	30.4	47.406	0	40.989	871870000	17	0.184648	-0.241529	-1.49854	0.564132	0.183338	0.617183	0.856354	-0.0342022	-0.18896	0.400974	0.207327	0.903713	0.566117	-0.21754	-0.613927	Q9CZP5
7.31124496459961	7.14031934738159	7.25466871261597	7.31864738464355	7.22541284561157	7.02623748779297	7.28652381896973	7.20825338363647	7.38730096817017	7.12185525894165	7.66506052017212	6.55350208282471	7.08066272735596	7.31141471862793	7.18355464935303									4	4	4	6.1	6.1	6.1	82.8	0.0013004	7.3822	227840000	11	0.355474	-0.0696132	-1.00099	0.378485	0.135185	0.965836	0.239336	-0.223937	-1.30615	0.413311	-0.154323	-0.878809	0.189549	-0.359122	-1.51768	Q9CZR2
8.10930824279785	7.91505146026611	7.85427570343018	8.0608491897583	8.04883003234863	8.05396175384521	7.95448875427246	7.96631050109863	7.79856109619141	7.89125871658325	8.52570533752441	7.82663202285767	7.96209478378296	7.83391189575195	7.98761701583862									9	9	9	35.1	35.1	35.1	34.004	0	32.087	1439500000	44	0.759237	0.0210266	0.320806	0.687505	0.0869706	0.426468	0.304295	-0.0823072	-1.12315	0.0827475	-0.103334	-2.07989	0.430673	-0.169278	-0.856844	Q9CZR3
9.23542785644531	9.24067401885986	9.25076103210449	9.17391395568848	9.15469741821289	9.12182235717773	9.47620868682861	9.42792415618896	9.38870525360107	9.25849342346191	9.30280685424805	9.2274751663208	9.20696067810059	9.34650897979736	9.48737907409668									12	12	12	54	54	54	35.334	0	271.64	28728000000	122	0.480343	0.0699689	0.752281	0.0611933	0.0914743	2.40563	0.218497	0.0918868	1.37422	0.85115	0.0219178	0.195906	0.996219	0.000412464	0.00498041	Q9CZR8
8.15971755981445	7.72180223464966	8.52205276489258	8.68750190734863	8.16861534118652	8.33619976043701	8.74331378936768	8.7301607131958	9.16787815093994	8.73514366149902	8.17213535308838	8.53147888183594	8.75689506530762	8.78747463226318	8.91390895843506									24	22	21	58.2	56.5	55.1	57.552	0	168.91	7287000000	87	0.423083	0.221804	0.859475	0.28477	0.41895	1.19753	0.0830381	0.474671	2.07736	0.175175	0.252867	1.53713	0.838112	0.0557203	0.215203	Q9CZS1
10.1487264633179	10.2247142791748	10.0572099685669	10.2402992248535	9.84876823425293	9.89361763000488	9.87430191040039	9.83532238006592	10.6746683120728	10.0967016220093	10.2088441848755	9.95432949066162	9.67906475067139	9.95054054260254	10.3152561187744	+			WT NR_WT					38	38	38	65.7	65.7	65.7	51.736	0	323.31	223260000000	618	0.000442992	-0.304735	-6.94209	0.355233	0.159001	1.01834	0.208896	-0.19294	-1.40757	0.426698	0.111795	0.852408	0.160851	-0.35194	-1.64519	Q9CZU6
6.89414405822754	6.66937208175659	7.13302755355835	6.44735956192017	7.11449956893921	7.27344131469727	7.19259548187256	7.02902936935425	7.94265794754028	6.54345226287842	7.92908239364624	7.30798768997192	6.964928150177	7.24430179595947	6.77193212509155									4	4	4	29.9	29.9	29.9	24.955	0	11.776	285000000	4	0.0575574	0.366416	2.34363	0.16809	0.685755	1.61103	0.1886	0.286312	1.48299	0.575546	-0.080104	-0.591868	0.380489	-0.399443	-0.961436	Q9D009
9.53177261352539	9.46393775939941	9.43571662902832	9.30783843994141	9.46896743774414	9.6513843536377	9.48662853240967	9.49018287658691	9.37315082550049	9.46749019622803	8.95005321502686	9.38920116424561	9.20221614837646	9.49315166473389	9.52523899078369									11	11	11	67.7	67.7	67.7	14.286	0	84.838	53369000000	287	0.207582	0.0894744	1.41225	0.288359	-0.171252	-1.18751	0.721389	-0.0323644	-0.373824	0.198709	-0.121839	-1.44453	0.42111	0.138887	0.876009	Q9D023
9.87230777740479	9.99728584289551	9.93869018554688	9.84940052032471	9.9174690246582	9.94747257232666	10.0083875656128	9.94458675384521	10.2884502410889	9.90066242218018	9.7102108001709	10.0135536193848	9.8793773651123	10.0012578964233	10.1571846008301									24	24	24	70.2	70.2	70.2	38.937	0	323.31	165720000000	561	0.33938	0.0400579	1.03777	0.739139	0.0520201	0.35207	0.186372	0.0984223	1.49172	0.368276	0.0583644	0.972682	0.78004	0.0464022	0.294736	Q9D051
7.34502077102661	7.58483982086182	7.52288722991943	7.49471092224121	7.58094787597656	7.41204023361206	7.4730486869812	7.47775793075562	7.71152019500732	7.53012275695801	7.5515308380127	7.47186374664307	7.56918668746948	6.97046327590942	7.30764579772949									5	5	5	9.3	9.3	9.3	61.417	0	29.421	464220000	28	0.988651	-0.000916004	-0.0148273	0.209146	0.11086	1.441	0.307539	-0.157075	-1.11492	0.294457	-0.156159	-1.14856	0.16041	-0.267935	-1.64732	Q9D0F9
8.41383647918701	8.36410045623779	8.44720458984375	8.21125411987305	8.23449230194092	8.15066432952881	8.46211338043213	8.4026050567627	7.2752423286438	8.49457168579102	8.28983402252197	8.2462272644043	8.27932453155518	8.32850170135498	8.1237211227417									13	13	13	38.5	38.5	38.5	49.939	0	52.769	2992200000	56	0.61977	-0.0466301	-0.52292	0.339514	-0.339216	-1.05548	0.142791	-0.114655	-1.6859	0.451404	-0.0680251	-0.80524	0.513648	0.224561	0.702619	Q9D0G0
9.9970588684082	10.0177431106567	9.90579605102539	9.85536766052246	10.0891628265381	10.01953125	10.0912446975708	10.0066795349121	10.0885610580444	9.90542888641357	9.96004676818848	9.91384601593018	9.89753913879395	10.0319738388062	10.1229362487793									33	33	33	65.6	65.6	65.6	55.988	0	323.31	167370000000	896	0.0513109	0.107663	2.42787	0.553653	0.0406875	0.634489	0.494344	0.0475824	0.727453	0.337043	-0.0600808	-1.04322	0.932542	0.00689491	0.0889933	Q9D0K2
7.76844549179077	7.84461402893066	7.8221549987793	7.93999814987183	8.06261920928955	7.88383150100708	7.90789461135864	7.91464471817017	8.30616760253906	7.83576011657715	7.82971668243408	8.03718757629395	8.18198680877686	8.12827014923096	7.6947455406189									10	10	10	27.6	27.6	27.6	59.735	0	71.582	1556500000	28	0.1192	0.0984443	1.81648	0.338399	0.146745	1.05817	0.197734	0.166744	1.44816	0.579823	0.0683	0.585069	0.918085	0.0199994	0.108146	Q9D0L4
9.93337059020996	9.97886085510254	9.74291324615479	9.81245231628418	9.45729160308838	9.62667942047119	9.75578308105469	9.65519618988037	10.058274269104	9.58695888519287	9.27468872070313	9.74161624908447	9.45080280303955	9.90408229827881	9.97439670562744	+			WT NR_WT					18	18	18	51.4	51.4	51.4	35.327	0	244.04	100000000000	255	0.0255514	-0.243162	-2.95186	0.310277	-0.226925	-1.12863	0.469077	-0.0991747	-0.772623	0.316659	0.143987	1.09217	0.610161	0.127751	0.543453	Q9D0M3
7.84708499908447	7.69581413269043	7.85769414901733	7.67579650878906	7.69854402542114	7.75215625762939	7.36282157897949	7.75422620773315	6.68945455551147	7.96246385574341	7.42505598068237	7.53878736495972	7.54286289215088	7.65111303329468	7.39144659042358			+	mU1 NR_WT					5	5	5	22.5	22.5	22.5	35.41	0	14.001	738580000	13	0.27396	-0.12716	-1.20391	0.248316	-0.410106	-1.30629	0.0162295	-0.238045	-3.30877	0.344161	-0.110885	-1.0267	0.608478	0.172061	0.546088	Q9D0Q7
8.66662120819092	8.77436351776123	8.80031871795654	8.79430675506592	8.35680961608887	8.32692909240723	8.45783615112305	8.27339458465576	9.22507667541504	8.6728458404541	8.69565677642822	8.69940376281738	8.31871032714844	8.60141849517822	8.85049915313721	+			WT NR_WT					9	9	9	58.3	58.3	58.3	17.32	0	83.735	8779100000	73	0.000185008	-0.40516	-8.1381	0.526874	0.105624	0.679714	0.269659	-0.141395	-1.21598	0.0676759	0.263766	2.22558	0.27346	-0.247018	-1.22985	Q9D0S9
9.58905506134033	9.66810607910156	9.67072772979736	9.57225608825684	9.73107242584229	9.771484375	9.72891330718994	9.64104747772217	9.83092212677002	9.58939075469971	9.23982524871826	9.73242568969727	9.7790699005127	9.84780693054199	9.70619678497314	+		+	mU1 NR_WT;WT NR_WT					16	16	16	74.8	74.8	74.8	28.09	0	323.31	79605000000	322	0.0486924	0.0930932	2.46644	0.646069	-0.0716569	-0.488192	0.0128549	0.141339	3.49817	0.288859	0.0482454	1.16334	0.210113	0.212995	1.4374	Q9D172
7.89714288711548	7.84888458251953	7.6271505355835	7.23696517944336	7.53975343704224	7.48983192443848	7.32407665252686	7.60171222686768	6.91746711730957	7.71144437789917	7.54884195327759	7.54798364639282	7.503014087677	7.44991016387939	7.41777038574219									4	4	4	21	21	21	30.169	0	12.098	567840000	11	0.35077	-0.163692	-1.0116	0.379416	-0.259951	-0.963789	0.302263	-0.172866	-1.12834	0.894136	-0.00917399	-0.138818	0.689257	0.0870851	0.423901	Q9D1B9
8.23108673095703	8.29937648773193	8.32862377166748	8.11424350738525	7.56393194198608	6.92761325836182	8.35491466522217	8.44305992126465	8.29176807403564	8.30678939819336	7.53649806976318	8.20652866363525	7.12313032150269	8.07419490814209	8.43541431427002									2	2	2	50.9	50.9	50.9	12.506	0	11.176	2382300000	23	0.287781	-0.420953	-1.16622	0.408877	-0.198314	-0.901021	0.369998	-0.283516	-0.968934	0.77507	0.137437	0.29894	0.84069	-0.0852015	-0.211714	Q9D1C3
7.96795511245728	8.05134582519531	7.90932083129883	8.17242813110352	8.13132953643799	7.78350353240967	8.27011966705322	8.01346969604492	7.25137042999268	8.05553150177002	7.92340135574341	8.07371807098389	8.12830257415771	7.8726282119751	7.77018880844116									4	4	4	10.5	10.5	10.5	56.43	0	25.267	1435500000	40	0.843102	0.0243431	0.20667	0.254434	-0.281828	-1.28706	0.551812	-0.0640531	-0.630169	0.531047	-0.0883962	-0.664528	0.388834	0.217775	0.943313	Q9D1G3
7.54825448989868	7.76344299316406	7.85321760177612	7.43463277816772	6.87187194824219	7.50607204437256	7.51761817932129	7.71925687789917	6.80743169784546	7.93352270126343	7.55815076828003	7.52543354034424	6.78901624679565	7.35966491699219	6.20239877700806									4	4	4	44.1	44.1	44.1	12.737	0	13.016	535910000	20	0.280343	-0.246182	-1.1863	0.501369	-0.216852	-0.724252	0.0741931	-0.680759	-2.15886	0.263329	-0.434576	-1.23404	0.350369	-0.463907	-1.02968	Q9D1H8
8.53611660003662	8.65225601196289	8.58773326873779	8.47707748413086	8.31338214874268	8.2074728012085	8.57272052764893	8.60716533660889	8.45218563079834	8.54139232635498	8.5392017364502	8.47849464416504	8.39885997772217	8.46211338043213	8.45112609863281			+	mU1 NR_WT					6	6	6	55.1	55.1	55.1	19.017	0	77.556	4938900000	54	0.235112	-0.138111	-1.31951	0.347277	-0.0523693	-1.03696	0.0305077	-0.115647	-2.81616	0.828549	0.0224633	0.226208	0.104228	-0.063278	-1.98263	Q9D1I5
7.7378363609314	7.84457635879517	7.92228937149048	7.85415410995483	7.91822957992554	7.93253469467163	7.85920429229736	8.00393390655518	6.95543384552002	7.98120212554932	7.69899654388428	7.62455034255981	7.71243906021118	7.54586362838745	7.74983692169189			+	mU1 NR_WT	+	mU1 NR_WT NR			4	4	4	37.9	37.9	37.9	15.874	0	18.478	925530000	33	0.116003	0.0887616	1.8361	0.308556	-0.294503	-1.13312	0.0225189	-0.181542	-3.04976	0.00256406	-0.270303	-4.95539	0.683887	0.112962	0.43178	Q9D1I6
8.37123394012451	8.41448879241943	8.66393661499023	8.43191051483154	8.7190408706665	8.72299575805664	8.75697040557861	8.74506664276123	8.54840183258057	8.68901538848877	8.28257656097412	8.86999988555908	8.94417667388916	8.70909214019775	8.72041606903076	+		+	mU1 NR_WT;WT NR_WT					4	4	4	30.7	30.7	30.7	15.661	0	106.56	6911400000	43	0.00710631	0.265626	4.00156	0.785775	0.0362721	0.286794	0.00802694	0.340529	3.89535	0.246235	0.0749028	1.28479	0.0532192	0.304257	2.51931	Q9D1L0
8.41580772399902	8.32380867004395	8.42183399200439	8.17026138305664	7.76369762420654	7.75078582763672	7.92859029769897	7.88055658340454	7.52626180648804	8.39424133300781	7.86894989013672	7.62399291992188	7.63928699493408	7.80858898162842	8.11790084838867	+		+	mU1 NR_WT;WT NR_WT					4	4	4	23.4	23.4	23.4	23.366	0	23.335	1853500000	28	0.000472349	-0.50202	-6.86025	0.129508	-0.40311	-1.81338	0.00597209	-0.535486	-4.15583	0.794306	-0.0334651	-0.272592	0.620527	-0.132375	-0.527314	Q9D1N9
7.46217346191406	7.64950037002563	7.67150592803955	7.6910285949707	7.46778583526611	7.80683088302612	7.51417589187622	7.54638242721558	6.60160636901855	7.78318881988525	7.63733959197998	7.42740488052368	7.55309391021729	7.59253215789795	6.83172082901001									6	6	6	33.7	33.7	33.7	20.677	0	14.494	517360000	18	0.720332	-0.0347583	-0.375321	0.421432	-0.27784	-0.875359	0.197311	-0.267364	-1.44974	0.272103	-0.232606	-1.2091	0.978788	0.0104764	0.0279443	Q9D1P0
9.48983192443848	9.65602111816406	9.73777294158936	9.54951858520508	9.13158702850342	9.16199684143066	9.42157077789307	9.44704914093018	9.93231678009033	9.63454818725586	9.37819766998291	9.28087425231934	9.09001064300537	9.27427291870117	9.56915187835693	+		+	mU1 NR_WT;WT NR_WT					24	24	24	45.4	45.4	45.4	48.994	0	323.31	61808000000	292	0.0191348	-0.317735	-3.17756	0.798764	0.0400681	0.268881	0.0360827	-0.304709	-2.68938	0.9231	0.0130265	0.100659	0.110375	-0.344777	-1.93785	Q9D2G2
8.02657413482666	8.16503620147705	7.86090660095215	7.85422706604004	8.07206630706787	7.74052858352661	7.98980140686035	7.96002340316772	7.35932302474976	8.04281139373779	8.18647575378418	7.93501329421997	7.82379341125488	7.74909448623657	7.83201026916504									8	8	8	19.9	19.9	19.9	33.578	0	31.068	1231800000	50	0.737262	-0.0360811	-0.351452	0.642964	-0.113816	-0.492901	0.141025	-0.141708	-1.69492	0.237072	-0.105627	-1.31329	0.903276	-0.0278922	-0.127816	Q9D338
7.48990201950073	7.30792379379272	7.05846405029297	7.30726051330566	6.75066947937012	6.65703153610229	7.28039646148682	7.50609874725342	8.30297946929932	7.08831310272217	7.82451868057251	7.40064144134521	7.28762245178223	7.56433439254761	8.37108612060547									6	6	6	18	18	18	52.576	0	28.013	662880000	13	0.319828	-0.242339	-1.0844	0.212747	0.447716	1.42766	0.210805	0.365034	1.40083	0.106115	0.607372	1.90037	0.849587	-0.0826826	-0.199694	Q9D379
9.48910045623779	9.41732215881348	9.30636024475098	9.27431964874268	9.72934341430664	9.68625164031982	9.52119064331055	9.51140213012695	9.09117412567139	9.40406322479248	9.38360023498535	9.51372337341309	9.85833835601807	9.68052577972412	9.34750556945801	+			WT NR_WT					9	9	9	66.7	66.7	66.7	17.6	0	82.671	46642000000	127	0.0183856	0.240271	3.2092	0.478526	-0.0788298	-0.765509	0.106865	0.228248	1.89529	0.925418	-0.0120237	-0.0976135	0.104277	0.307077	1.98226	Q9D3D9
8.5770092010498	8.59631156921387	8.78633213043213	8.58626079559326	8.64566802978516	8.68242454528809	8.75104808807373	8.81683731079102	8.58631706237793	8.70628261566162	8.52728176116943	8.77163887023926	8.61053276062012	8.74538707733154	8.61727333068848									13	13	13	48.8	48.8	48.8	48.627	0	95.382	7226100000	94	0.212949	0.0875161	1.39332	0.702825	-0.0298513	-0.404127	0.476163	0.0497296	0.75979	0.529478	-0.0377865	-0.66716	0.285141	0.0795809	1.19649	Q9D404
7.55351877212524	7.63304424285889	7.58341407775879	7.8231348991394	7.46827363967896	7.71500825881958	7.48418569564819	7.62415838241577	7.50813913345337	7.77029943466187	8.40890121459961	7.65789699554443	7.33773851394653	7.63739967346191	7.22998905181885									6	6	6	20.2	20.2	20.2	40.744	0	19.596	519830000	21	0.406626	-0.0753715	-0.892232	0.340434	0.247502	1.05327	0.189197	-0.182522	-1.48066	0.415275	-0.10715	-0.874896	0.155587	-0.430024	-1.671	Q9D5T0
7.16083526611328	7.66409635543823	7.63815975189209	7.68102407455444	7.42142200469971	6.79065465927124	7.83132553100586	8.03116607666016	6.79762506484985	7.65488862991333	7.23040771484375	7.96233129501343	7.83504343032837	7.93814420700073	7.90529918670654			+	mU1 NR_WT			+	mU1 NR_mU1	3	3	3	4.6	4.6	4.6	101.98	0	12.805	664090000	14	0.955839	-0.0173868	-0.0577294	0.280096	-0.308388	-1.21075	0.0268245	0.374176	2.91445	0.204682	0.391562	1.42266	0.0225404	0.682564	3.2562	Q9D666
8.45154094696045	8.29743194580078	8.12703990936279	8.14220142364502	8.07239723205566	8.08983421325684	8.0351095199585	8.04925632476807	8.37447357177734	7.92047309875488	7.30334901809692	7.98558807373047	8.06001758575439	8.21306610107422	8.07682228088379	+			WT NR_WT					5	5	5	37.1	37.1	37.1	21.876	0	16.369	2243400000	26	0.0463587	-0.192904	-2.5027	0.216713	-0.388455	-1.41322	0.105676	-0.17068	-1.90336	0.665691	0.0222242	0.454143	0.449699	0.217775	0.819664	Q9D6J5
10.0894460678101	9.91358089447021	10.0036754608154	9.76557922363281	9.49490547180176	9.48050975799561	9.85016822814941	10.0006074905396	9.20887088775635	9.86313819885254	9.57311534881592	9.52175235748291	9.33439350128174	9.6546573638916	9.69162082672119			+	mU1 NR_WT					17	17	17	80.6	80.6	80.6	27.285	0	323.31	93947000000	350	0.159517	-0.236523	-1.60545	0.0777175	-0.394696	-2.21395	0.0102116	-0.392464	-3.68977	0.347711	-0.155942	-1.01856	0.990842	0.0022312	0.0120629	Q9D6J6
8.47876834869385	8.48542308807373	8.59580516815186	8.60079860687256	8.84323883056641	8.8408088684082	8.65649127960205	8.72196674346924	8.10656452178955	8.6404914855957	9.05037975311279	8.56849479675293	8.94398403167725	8.52935314178467	8.43243980407715	+			WT NR_WT					8	8	8	49.7	49.7	49.7	16.564	0	178.6	6176500000	107	0.00751451	0.225428	3.95268	0.809582	0.0589465	0.254039	0.528228	0.0783691	0.669259	0.270864	-0.147058	-1.21258	0.944277	0.0194227	0.0734743	Q9D6K8
8.50987434387207	8.38327693939209	8.43644905090332	8.4072380065918	8.52356433868408	8.66877746582031	8.53695011138916	8.61018085479736	8.53009700775146	8.45370006561279	8.46774101257324	8.44337272644043	8.49176788330078	8.5697603225708	8.43060684204102	+			WT NR_WT					11	11	11	36.8	36.8	36.8	34.67	0	161.96	4895000000	83	0.013512	0.150659	3.45729	0.248035	0.0496364	1.30718	0.279659	0.0496674	1.18817	0.071636	-0.100991	-2.18429	0.999443	3.09149e-05	0.000733556	Q9D6M3;Q9DB41
10.2178258895874	10.2163238525391	10.2676877975464	10.2059078216553	10.3325595855713	10.2877349853516	10.2977170944214	10.2608823776245	10.4096622467041	10.202733039856	10.1794080734253	10.3124732971191	10.2452163696289	10.4075269699097	10.3523950576782	+		+	mU1 NR_WT;WT NR_WT					34	34	34	57.9	57.9	57.9	39.638	0	323.31	311180000000	732	0.0155475	0.0677872	3.34332	0.584696	0.0369981	0.583803	0.0320039	0.102467	2.77984	0.387649	0.0346794	0.931275	0.413068	0.0654685	0.892387	Q9D6R2
7.6495099067688	7.69392919540405	7.86426782608032	7.57826089859009	7.08466482162476	7.00394535064697	7.57238340377808	7.62340450286865	8.01628112792969	7.68410015106201	7.46297264099121	7.51619148254395	7.50361347198486	6.48313474655151	7.78583526611328									3	3	3	18.3	18.3	18.3	29.05	0	9.91	836520000	11	0.0719195	-0.375392	-2.18143	0.878076	0.024626	0.161428	0.249391	-0.374298	-1.27519	0.997456	0.00109422	0.00332378	0.32478	-0.398924	-1.09164	Q9D6S7
7.6763916015625	7.52712678909302	7.67893695831299	7.60329580307007	7.6962513923645	7.89580917358398	7.70210313796997	7.4843282699585	7.7440505027771	7.50138807296753	7.58832454681396	7.60309028625488	7.55094957351685	7.75527238845825	7.5629825592041									3	3	3	21.3	21.3	21.3	17.725	0	17.365	685710000	25	0.453957	0.0731852	0.800471	0.89462	-0.0101834	-0.139341	0.956572	-0.00336409	-0.05677	0.457073	-0.0765493	-0.79468	0.9365	0.00681933	0.0837564	Q9D6U8
8.57331275939941	8.44884490966797	8.52303028106689	8.41733837127686	8.65934562683105	8.64601135253906	8.4649658203125	8.74509811401367	8.32909297943115	8.36199188232422	8.07878303527832	8.65703678131104	8.68452262878418	8.61080932617188	8.45809364318848		+		mU1_WT			+	mU1 NR_mU1	9	9	9	50.6	50.6	50.6	25.988	0	45.96	5554400000	87	0.0908225	0.138224	2.01263	0.0412876	-0.234009	-2.72985	0.119269	0.111984	1.81606	0.746707	-0.0262396	-0.338235	0.0153321	0.345993	3.61299	Q9D6Y7
6.40628099441528	7.22432947158813	6.78330326080322	7.09586668014526	6.75032663345337	6.7113242149353	6.94883823394775	6.33955812454224	7.09145593643188	7.03406667709351	7.36995410919189	7.14801502227783	6.86467123031616	6.69155645370483	7.20913934707642									1	1	1	5.1	5.1	5.1	33.942	0.0022805	4.4375	110120000	8	0.425589	-0.189933	-0.854571	0.270903	0.287714	1.23733	0.661377	0.1009	0.460498	0.149247	0.290834	1.65383	0.316607	-0.186813	-1.1123	Q9D710
8.15573024749756	7.9229588508606	7.99886083602905	7.9322452545166	8.46089744567871	8.34725189208984	8.16568946838379	8.17280673980713	7.00660419464111	8.00259780883789	7.79644203186035	8.22804069519043	8.3296012878418	8.1543025970459	7.69703722000122	+			WT NR_WT					5	5	5	26.1	26.1	26.1	33.34	0	83.196	2284600000	39	0.0192871	0.284213	3.17129	0.186576	-0.400567	-1.52998	0.529972	0.0997967	0.666331	0.284837	-0.184416	-1.17411	0.159632	0.500364	1.65109	Q9D773
8.85479736328125	8.88332653045654	9.10734558105469	8.88003540039063	9.18740749359131	9.12525367736816	9.16820240020752	9.12694263458252	8.80730533599854	9.07689476013184	8.79133987426758	9.25553798675537	9.17263221740723	9.21937465667725	8.89278984069824	+			WT NR_WT					23	23	23	63.9	63.9	63.9	45.019	0	135.72	17013000000	176	0.0111407	0.220575	3.61673	0.72028	-0.0395296	-0.378955	0.091412	0.203707	2.00796	0.84741	-0.0168679	-0.200906	0.108524	0.243237	1.95105	Q9D7B6
9.10697269439697	9.22605800628662	9.11300659179688	9.03165054321289	9.25954627990723	9.11584377288818	9.20005702972412	9.21165466308594	8.49174022674561	9.14783096313477	9.17831516265869	8.76665115356445	9.17943668365479	8.87063789367676	8.72518444061279					+	mU1 NR_WT NR			3	3	3	44.4	44.4	44.4	13.163	0	45.282	13056000000	47	0.17277	0.0773535	1.54724	0.394135	-0.180127	-0.93196	0.0779606	-0.233944	-2.12299	0.0269222	-0.311298	-2.91166	0.819112	-0.0538179	-0.241019	Q9D7J4
7.76740074157715	7.76953983306885	7.83572864532471	7.70762968063354	6.73366498947144	7.38645458221436	6.81787061691284	7.74041795730591	7.88290023803711	7.84291505813599	7.79762601852417	7.73522329330444	6.58226823806763	6.52372598648071	7.81953716278076	+			WT NR_WT					4	4	4	27.7	27.7	27.7	32.402	0	25.855	723210000	7	0.046817	-0.600473	-2.49543	0.114262	0.0710724	1.91085	0.139319	-0.604886	-1.70374	0.992094	-0.00441337	-0.0103286	0.167978	-0.675958	-1.61155	Q9D7J9
7.90084743499756	8.16181659698486	7.9837121963501	7.84385538101196	8.31376171112061	8.23360538482666	7.97312307357788	8.09201812744141	7.11316061019897	7.89625597000122	7.83039474487305	8.07276439666748	8.23164749145508	8.1358003616333	7.70363521575928									13	13	13	39.5	39.5	39.5	44.929	0	81.703	1539500000	70	0.12859	0.180569	1.76171	0.17162	-0.359287	-1.5949	0.654459	0.063404	0.47073	0.428383	-0.117165	-0.849127	0.152188	0.422691	1.68813	Q9D7N3
7.36072587966919	7.30377912521362	7.41200685501099	7.44360733032227	7.72481632232666	6.82171154022217	7.48839569091797	7.45727634429932	7.75816202163696	7.49523878097534	7.37481689453125	7.43031692504883	7.35806798934937	7.50857019424438	7.51525115966797									4	4	4	14.9	14.9	14.9	46.434	0	11.01	460910000	10	0.972699	-0.00697982	-0.0356744	0.169445	0.162709	1.6048	0.179634	0.0730218	1.51873	0.69842	0.0800016	0.406582	0.429384	-0.0896877	-0.859409	Q9D7N9
7.46329545974731	6.89141988754272	7.54367065429688	7.5488805770874	7.92134284973145	7.7387170791626	7.53260135650635	6.71298885345459	7.26969957351685	7.51348400115967	7.62717151641846	7.65703678131104	7.70954990386963	7.53725242614746	7.55984687805176									2	2	2	14.9	14.9	14.9	18.098	0	16.763	719260000	18	0.724235	0.114596	0.369797	0.622759	0.108302	0.523859	0.170368	0.254105	1.55747	0.623409	0.139509	0.517372	0.206388	0.145803	1.45136	Q9D7P6
8.44015312194824	8.16967487335205	8.09558773040771	8.25861358642578	8.35512542724609	8.36376190185547	8.39567565917969	8.51567554473877	8.10458946228027	8.06929779052734	7.5403790473938	8.31943893432617	8.54956722259521	8.3543004989624	8.03233623504639									6	6	6	58.6	58.6	58.6	13.527	0	19.429	3120400000	32	0.0916305	0.166552	2.00624	0.114559	-0.336252	-1.90882	0.59514	0.0729034	0.560955	0.438608	-0.0936489	-0.829428	0.0937446	0.409155	2.06575	Q9D855
8.37311458587646	8.29294204711914	8.45794200897217	8.4873218536377	8.56502056121826	8.52405834197998	8.3141622543335	8.51511859893799	8.39866924285889	8.35117721557617	9.04091835021973	8.7125825881958	8.78100776672363	8.68753814697266	8.52748775482178			+	mU1 NR_WT	+	mU1 NR_WT NR			10	10	10	31.7	31.7	31.7	39.776	0	85.313	5195500000	90	0.323168	0.0767598	1.07627	0.36121	0.194091	1.00458	0.00748024	0.274324	3.95667	0.0439293	0.197564	2.54256	0.700121	0.0802325	0.408053	Q9D880
9.17443752288818	8.95525932312012	9.0581226348877	8.84567451477051	9.46834754943848	9.69054126739502	9.31361389160156	9.36904907226563	8.40703392028809	9.00410652160645	8.87221431732178	9.2921895980835	9.43160533905029	9.35890483856201	8.90963077545166	+			WT NR_WT					12	12	12	71.6	71.6	71.6	14.982	0	180.54	25935000000	170	0.00600161	0.452014	4.15141	0.211998	-0.247255	-1.43042	0.128332	0.239709	1.76316	0.188164	-0.212305	-1.48469	0.0632647	0.486964	2.37873	Q9D8B4
7.52359056472778	7.40224409103394	7.44285583496094	7.21146583557129	7.61560297012329	7.77366924285889	7.39989852905273	7.61782836914063	7.28949975967407	7.5865535736084	7.4019947052002	7.57909727096558	7.69271469116211	7.66477346420288	7.22138833999634									6	6	6	15	15	15	58.877	0	19.356	493280000	24	0.087548	0.206711	2.03914	0.78319	0.0309769	0.290371	0.299803	0.144454	1.13467	0.656546	-0.0622563	-0.467637	0.476931	0.113477	0.768443	Q9D8H7
7.96664381027222	8.03746604919434	8.11571025848389	8.22455883026123	8.14789295196533	8.11397647857666	8.26620769500732	8.21277332305908	7.02871513366699	8.22554206848145	7.31477737426758	8.00936603546143	8.03003311157227	8.03152942657471	7.8769793510437					+	mU1 NR_WT NR			4	4	4	35.8	35.8	35.8	20.249	0	35.273	1664800000	27	0.177286	0.0991179	1.52836	0.127944	-0.563083	-1.82282	0.186879	-0.0991178	-1.48972	0.00753919	-0.198236	-3.94982	0.188768	0.463965	1.52089	Q9D8P4
6.36340093612671	7.38455057144165	7.4645791053772	7.87341356277466	6.83203887939453	6.57656240463257	7.11475801467896	7.47630977630615	6.89531469345093	7.54886817932129	8.794508934021	6.96215057373047	7.34915208816528	6.53152751922607	6.8202486038208									2	2	2	25.3	25.3	25.3	16.925	0	26.794	454460000	16	0.495847	-0.271569	-0.724816	0.465563	0.474745	0.789556	0.365317	-0.355716	-0.979157	0.754723	-0.0841476	-0.327072	0.162766	-0.830461	-1.636	Q9D8W7
8.23954963684082	8.263991355896	8.27244472503662	8.58849620819092	8.53620433807373	8.72034931182861	8.34643077850342	8.26285457611084	8.40153884887695	8.46271228790283	8.73146820068359	8.23157119750977	8.57330131530762	8.3342924118042	8.29010105133057									8	8	8	60.2	60.2	60.2	21.539	0	24.399	2829100000	32	0.377163	0.125339	0.953481	0.20073	0.190786	1.47305	0.889449	0.016196	0.145013	0.422156	-0.109143	-0.861294	0.214156	-0.17459	-1.4225	Q9D8Y1
6.7418417930603	6.57204246520996	6.65122985839844	6.79042053222656	6.94483852386475	7.02820873260498	7.87265729904175	7.99987840652466	6.66117715835571	7.79677534103394	7.57655477523804	6.45951461791992	7.93518972396851	6.69067192077637	6.99918031692505	+			WT NR_WT					2	2	2	32.6	32.6	32.6	14.188	0	18.419	775550000	15	0.0329604	0.772512	2.75756	0.0778746	0.655952	2.21234	0.349781	0.332255	1.01385	0.34087	-0.440257	-1.0343	0.531095	-0.323697	-0.672485	Q9D924
7.47559833526611	7.48599100112915	7.13080501556396	7.59198808670044	6.96797180175781	6.97905683517456	7.21103429794312	6.83720350265503	6.81451988220215	6.58294343948364	7.29625225067139	6.87436580657959	7.15413427352905	6.68685913085938	6.79947423934937	+		+	mU1 NR_WT;WT NR_WT					4	4	4	26.4	26.4	26.4	21.708	0	8.8923	389690000	5	0.0158374	-0.422279	-3.32844	0.0567344	-0.52319	-2.46706	0.00857569	-0.542387	-3.83832	NaN	0	NaN	NaN	0	NaN	Q9DB15
9.5963773727417	9.53459739685059	9.41086196899414	9.50964641571045	9.35905742645264	9.49235534667969	9.57866191864014	9.54152965545654	10.0232934951782	9.4659481048584	9.42789173126221	9.37551689147949	9.48407173156738	9.53857326507568	9.70825099945068									20	20	20	78.9	78.9	78.9	23.363	0	306.52	65894000000	261	0.756702	-0.0199697	-0.324323	0.484854	0.126174	0.753943	0.868362	0.0137324	0.17297	0.703371	0.0337021	0.39948	0.561111	-0.112441	-0.622151	Q9DB20
8.20433712005615	8.38829708099365	8.76305389404297	8.48729419708252	8.32514572143555	8.52305698394775	8.59580516815186	8.56410980224609	8.74908638000488	8.63610649108887	8.68033504486084	8.71013450622559	8.46850967407227	8.8389310836792	8.77260780334473									10	10	10	50.2	50.2	50.2	21.67	0	139.9	5633600000	98	0.764169	0.0412838	0.313976	0.166302	0.227764	1.61933	0.145995	0.2368	1.66981	0.101256	0.195516	1.93418	0.931107	0.00903646	0.0908919	Q9DB60
8.55158424377441	8.66586208343506	8.75026893615723	8.66126346588135	8.22893905639648	8.31937694549561	8.76391410827637	8.72776889801025	9.80773162841797	8.61813163757324	8.39529132843018	8.78073501586914	8.69016075134277	8.75399684906006	9.47339916229248									24	24	24	65.2	65.2	65.2	34.134	0	323.31	19567000000	118	0.344449	-0.147245	-1.02604	0.478625	0.28314	0.765327	0.205675	0.267328	1.41908	0.121143	0.414573	1.80481	0.971861	-0.0158119	-0.0370731	Q9DB73
10.7214975357056	10.7199859619141	10.6215085983276	10.5216484069824	10.5388879776001	10.6059188842773	10.4951972961426	10.5225486755371	9.98830032348633	10.5653514862061	10.4501104354858	10.5702629089355	10.4139528274536	10.5487575531006	10.4316053390503			+	mU1 NR_WT					45	45	45	82.6	82.6	82.6	48.234	0	323.31	533400000000	1040	0.0942995	-0.105522	-1.98552	0.105514	-0.311573	-1.97303	0.046839	-0.155015	-2.49508	0.326318	-0.0494936	-1.06867	0.358469	0.156557	1.01087	Q9DB77
8.15582180023193	8.07914543151855	8.56486701965332	8.18542861938477	8.18619346618652	8.20183372497559	8.46870136260986	8.51400279998779	8.11280632019043	8.37440013885498	8.2210750579834	8.50813865661621	8.29976844787598	8.41927814483643	8.40800285339355									15	15	15	32.3	32.3	32.3	58.861	0	77.308	3184800000	64	0.513201	0.0963671	0.694753	0.945877	-0.0102219	-0.0713608	0.212946	0.162481	1.39334	0.518264	0.0661142	0.68611	0.0865497	0.172703	2.12867	Q9DBF1
6.89579820632935	6.88487863540649	6.78670167922974	6.51045989990234	6.98281288146973	7.06731462478638	6.31935739517212	6.89206123352051	6.88763999938965	6.99187040328979	7.24053859710693	6.60658550262451	7.21844577789307	6.77844285964966	7.02833986282349									2	2	2	2	2	2	104.58	0.0022447	4.154	59128000	5	0.818451	0.0459269	0.239823	0.10653	0.270557	1.96554	0.425578	0.138494	0.854592	0.683746	0.092567	0.42777	0.500829	-0.132063	-0.725212	Q9DBG3
7.73034620285034	7.82530927658081	7.93184423446655	7.69528913497925	7.4098653793335	7.45674562454224	7.65194654464722	7.75882863998413	7.69890069961548	7.89538383483887	7.78686666488647	7.83353614807129	7.47405576705933	7.30537271499634	8.02275848388672									5	5	5	8.2	8.2	8.2	69.062	0	41.941	816420000	24	0.0597614	-0.226351	-2.31617	0.980909	-0.00198015	-0.0251489	0.457298	-0.136766	-0.794262	0.642257	0.0895842	0.488917	0.529416	-0.134786	-0.675355	Q9DBG6
6.8782114982605	6.26833200454712	7.18318462371826	7.05716705322266	7.41338539123535	7.15597343444824	7.00232410430908	7.24333572387695	7.22358846664429	6.58166122436523	7.40787267684937	7.43105792999268	6.53512620925903	6.7672438621521	6.39587926864624									2	2	2	5.6	5.6	5.6	40.429	0.0023641	5.4123	205910000	4	0.155921	0.357031	1.62204	0.51263	0.224317	0.704399	0.840347	-0.064397	-0.210362	0.136113	-0.421428	-1.72059	0.438188	-0.288714	-0.842012	Q9DBH5
8.84144115447998	8.79957485198975	9.09642314910889	8.79078483581543	8.94350433349609	8.95244884490967	9.08568286895752	9.06881618499756	8.74658012390137	8.96426868438721	8.83707046508789	9.03897762298584	8.95057392120361	9.04080009460449	8.88906097412109									18	18	18	45.6	45.6	45.6	47.874	0	157.47	13178000000	141	0.160121	0.130557	1.6027	0.757831	-0.0327496	-0.325713	0.273583	0.0977972	1.20496	0.556343	-0.0327599	-0.622781	0.115041	0.130547	1.90555	Q9DBL1
8.37624835968018	8.35524082183838	8.2882719039917	8.44081497192383	8.21780014038086	8.33883476257324	8.38902378082275	8.4089183807373	8.99926567077637	8.20677185058594	8.20420169830322	8.44969463348389	8.30815887451172	8.49684619903564	8.64165210723877									13	13	13	35.7	35.7	35.7	58.278	0	93.54	4804200000	55	0.636003	-0.0264997	-0.498308	0.659832	0.104936	0.467466	0.199635	0.108944	1.4411	0.145678	0.135444	1.67139	0.987098	0.00400821	0.0169948	Q9DC61
9.9706859588623	9.96724796295166	9.90824413299561	9.79676151275635	9.81198406219482	9.76899337768555	9.85642051696777	9.79192924499512	9.55909252166748	9.79996776580811	9.86566066741943	9.81460666656494	9.73583793640137	9.86893272399902	9.69549942016602									33	33	33	74.5	74.5	74.5	42.525	0	323.31	104690000000	598	0.0597829	-0.103403	-2.31591	0.12401	-0.169161	-1.8471	0.0573116	-0.132016	-2.34676	0.531779	-0.0286126	-0.663303	0.698665	0.0371455	0.410169	Q9DC69
10.0339460372925	9.97194766998291	9.92828845977783	9.65675926208496	9.77274703979492	9.66393661499023	10.0436372756958	9.98944091796875	9.24548816680908	9.92009162902832	9.67421817779541	9.73289203643799	9.89043807983398	9.90521812438965	9.64765644073486									21	21	21	71	71	71	24.683	0	322.4	114470000000	361	0.81256	-0.0302949	-0.247788	0.198658	-0.284469	-1.48113	0.357433	-0.103684	-0.99661	0.52661	-0.0733893	-0.671981	0.363057	0.180785	1.00036	Q9DC70
7.29896211624146	7.33197355270386	7.40282869338989	6.77326822280884	7.10918617248535	7.34846067428589	6.80435609817505	6.93223524093628	6.82455539703369	7.16084480285645	7.09759998321533	6.65584278106689	7.16160774230957	6.80798625946045	6.92596054077148									3	3	3	12.8	12.8	12.8	29.463	0.0012937	7.1647	240650000	10	0.442718	-0.153199	-0.821604	0.404979	-0.174091	-0.909115	0.131071	-0.313909	-1.7479	0.351152	-0.16071	-1.01074	0.402537	-0.139817	-0.914217	Q9DC71
7.54906463623047	7.85092163085938	7.76146173477173	7.41386938095093	7.85889196395874	7.94203805923462	7.55917596817017	7.45821475982666	6.2086033821106	7.72594451904297	7.63949775695801	7.69074535369873	7.70059967041016	7.76952505111694	7.46143865585327									3	3	3	19.4	19.4	19.4	20.208	0	74.473	698160000	21	0.704918	0.0607508	0.397266	0.33892	-0.452481	-1.05691	0.925142	0.0117478	0.0979769	0.727442	-0.049003	-0.365268	0.31854	0.464229	1.10737	Q9DCA2
8.62046909332275	8.68924713134766	8.71865940093994	8.54050445556641	8.85195541381836	8.77083015441895	8.83581733703613	8.85917472839355	8.53275394439697	8.67092227935791	8.37560844421387	8.85838031768799	8.83501148223877	8.85191822052002	8.74289798736572	+		+	mU1 NR_WT;WT NR_WT			+	mU1 NR_mU1	8	8	8	66.9	66.9	66.9	16.718	0	79.183	7847400000	63	0.00562766	0.187224	4.20928	0.233243	-0.115792	-1.35559	0.00945075	0.179832	3.75529	0.832941	-0.00739241	-0.220302	0.0128346	0.295624	3.78419	Q9DCB8
7.18760538101196	6.89010190963745	7.23220062255859	6.8126859664917	6.82536697387695	7.42337703704834	6.60942506790161	7.03488349914551	6.99061965942383	6.39670705795288	7.56200313568115	6.69719076156616	7.03420352935791	6.75526237487793	6.79440546035767									2	2	2	11.8	11.8	11.8	21.733	0.0023613	5.3798	159710000	5	0.786636	-0.0573853	-0.283069	0.883263	-0.0475385	-0.154494	0.152858	-0.210383	-1.63646	0.44802	-0.152998	-0.811587	NaN	0	NaN	Q9DCI9
9.4277458190918	9.4749584197998	9.39352226257324	9.21471118927002	8.78008651733398	9.13222789764404	9.15057182312012	9.2108268737793	9.05583667755127	9.32267379760742	8.89278984069824	9.00039100646973	8.8348970413208	9.12762260437012	8.96550750732422	+		+	mU1 NR_WT;WT NR_WT					12	12	12	77.3	77.3	77.3	19.992	0	139.99	25112000000	155	0.0337751	-0.309306	-2.73912	0.0691972	-0.287301	-2.30663	0.00306547	-0.39563	-4.77916	0.479921	-0.0863237	-0.753037	0.431686	-0.108329	-0.854833	Q9DCJ5
8.78540802001953	8.82391738891602	8.92990398406982	8.83362483978271	9.05422973632813	9.01515007019043	9.06303310394287	9.05671405792236	9.07896423339844	8.852370262146	8.54332256317139	9.14292144775391	9.10809135437012	9.13852405548096	9.18218612670898	+		+	mU1 NR_WT;WT NR_WT	+	mU1 NR_WT NR			14	14	14	82.7	82.7	82.7	27.738	0	116.88	15333000000	165	0.00076904	0.204068	6.26328	0.897207	-0.0183279	-0.135894	0.000123742	0.299717	8.74514	0.00218349	0.095649	5.11754	0.059703	0.318045	2.42561	Q9DCM0
8.30328273773193	8.41448879241943	8.44505882263184	8.61827850341797	8.47410011291504	8.52058792114258	8.39320659637451	8.39015769958496	8.54481220245361	8.57273197174072	8.63329696655273	8.26660823822021	8.36670303344727	8.3722677230835	8.15360164642334					+	mU1 NR_WT NR	+	mU1 NR_mU1	12	12	12	59.3	59.3	59.3	25.704	0	71.069	4350300000	81	0.991946	-0.000764132	-0.0105219	0.145145	0.138336	1.72489	0.110479	-0.155482	-1.8713	0.0432825	-0.154718	-2.55356	0.00616684	-0.293819	-4.54033	Q9DCM2
8.76321125030518	8.74529361724854	8.84361934661865	8.93323421478271	8.92934226989746	8.84898281097412	9.01694965362549	9.01422595977783	9.44196224212646	8.89297866821289	9.12031078338623	9.12063980102539	9.01300621032715	9.070481300354	9.20276069641113			+	mU1 NR_WT	+	mU1 NR_WT NR			14	14	14	53.8	53.8	53.8	34.127	0	179.8	17141000000	117	0.0671694	0.131036	2.23104	0.0683355	0.330411	2.31668	0.00311829	0.280382	4.76252	0.0389414	0.149347	2.63226	0.738066	-0.0500286	-0.353592	Q9DCN2
8.84709739685059	8.88484668731689	8.86692523956299	8.74167919158936	8.94515800476074	8.88848876953125	8.92798614501953	8.99153614044189	8.89929485321045	8.93521499633789	8.90920829772949	8.82104778289795	8.71906566619873	8.77822399139404	8.97016525268555	+			WT NR_WT					18	18	18	68.4	68.4	68.4	40.342	0	200.82	12072000000	197	0.0367168	0.103155	2.6763	0.0973612	0.0794356	2.03602	0.841889	-0.0130115	-0.208295	0.0906859	-0.116167	-2.01372	0.208462	-0.092447	-1.44355	Q9DCS3
8.57904052734375	8.36934566497803	8.35661888122559	8.22318458557129	7.83225345611572	7.93598556518555	8.44861316680908	8.29589653015137	8.97379302978516	8.23678874969482	7.16610193252563	7.53017425537109	8.14560031890869	7.69828319549561	8.42913818359375									9	9	9	56.2	56.2	56.2	21.024	0	66.439	4269600000	43	0.171141	-0.25386	-1.55416	0.591437	-0.256486	-0.57302	0.0957208	-0.431248	-1.97473	0.508058	-0.177388	-0.703591	0.74191	-0.174762	-0.348145	Q9DCS9
9.67815399169922	9.62778568267822	9.56735610961914	9.49837970733643	9.05465126037598	9.16109848022461	9.22383308410645	9.26806259155273	9.33278179168701	9.45866775512695	9.40238189697266	9.01029968261719	8.95725250244141	9.20322322845459	9.44155406951904	+	+	+	mU1 NR_WT;mU1_WT;WT NR_WT					19	19	19	58.9	58.9	58.9	30.149	0	191.1	37367000000	200	0.000462365	-0.416008	-6.88741	0.0165903	-0.194975	-3.53843	0.00918856	-0.439837	-3.77924	0.848011	-0.023829	-0.200101	0.125756	-0.244861	-1.83623	Q9DCT2
8.45609283447266	8.50145626068115	8.44770050048828	8.26916217803955	8.53908824920654	8.44802570343018	8.48228740692139	8.48905849456787	6.87181997299194	8.4164571762085	8.43509578704834	8.46055221557617	8.39853000640869	8.43351364135742	8.22289848327637									14	14	14	62.2	62.2	62.2	33.073	0	77.02	3552000000	75	0.240572	0.071012	1.30229	0.295736	-0.510812	-1.16727	0.610951	-0.0397294	-0.536439	0.0987162	-0.110741	-1.9525	0.331277	0.471083	1.07552	Q9DCU6
7.54349708557129	7.81261253356934	7.68992137908936	7.80146551132202	7.9477276802063	7.868332862854	7.8740930557251	7.88809537887573	7.90008306503296	7.95054483413696	7.66007995605469	7.78708505630493	7.82299137115479	7.91217422485352	8.03205394744873	+			WT NR_WT					7	7	7	22.3	22.3	22.3	35	0	21.038	993070000	29	0.0310502	0.182688	2.80278	0.288729	0.125028	1.18649	0.0774382	0.176702	2.12786	0.920523	-0.00598609	-0.104047	0.623807	0.0516735	0.522239	Q9DCV4
10.3888826370239	10.3927850723267	10.4158744812012	10.2798948287964	10.2476291656494	10.293251991272	10.2865915298462	10.3027849197388	10.4418048858643	10.3337497711182	9.97385311126709	10.4072380065918	10.2292976379395	10.367262840271	10.3499374389648	+			WT NR_WT					27	27	27	89	89	89	27.623	0	323.31	341100000000	557	0.0379467	-0.0867949	-2.65161	0.378182	-0.119557	-0.966504	0.550512	-0.0309253	-0.632296	0.213712	0.0558696	1.39067	0.515519	0.0886314	0.699354	Q9DCW4
9.26864814758301	9.1699390411377	9.0712194442749	9.01911640167236	9.44103527069092	9.45930194854736	9.18124294281006	9.22559356689453	9.32161903381348	9.01249980926514	8.71874237060547	9.22026538848877	9.31158447265625	9.34686088562012	9.1878023147583									15	15	15	83.9	83.9	83.9	18.749	0	139	26505000000	200	0.0754628	0.194563	2.14657	0.504821	-0.11461	-0.718134	0.090492	0.134398	2.01527	0.486001	-0.0601652	-0.742189	0.162785	0.249008	1.63591	Q9DCX2
9.28515243530273	9.21112060546875	9.26681900024414	9.21162796020508	9.30601692199707	9.38770961761475	9.39390850067139	9.30464172363281	9.13792324066162	9.21274662017822	9.1062593460083	9.35901927947998	9.2440299987793	9.33245849609375	9.29635810852051	+	+		mU1_WT;WT NR_WT			+	mU1 NR_mU1	11	11	11	76.8	76.8	76.8	22.604	0	174.55	27496000000	159	0.015468	0.104389	3.34746	0.0463733	-0.0913703	-2.63286	0.0859399	0.0642865	2.05254	0.296347	-0.0401027	-1.14362	0.0110099	0.155657	3.93545	Q9DCZ4
6.72578096389771	6.96628761291504	6.99873876571655	6.83334493637085	6.71750402450562	6.7229585647583	6.95501947402954	7.04457902908325	6.78797721862793	7.13216352462769	7.76729393005371	7.27263069152832	6.67932224273682	7.08317995071411	7.05014801025391									3	3	3	5.3	5.3	5.3	66.943	0.0013158	7.6151	131110000	10	0.846422	-0.0210228	-0.202226	0.224541	0.348107	1.38543	0.352229	0.140282	1.0083	0.321027	0.161305	1.08147	0.493276	-0.207825	-0.738713	Q9EP69
6.66773653030396	6.79791831970215	7.60305786132813	7.58018350601196	6.76416301727295	7.39506006240845	6.8275990486145	6.85482692718506	8.17992496490479	7.62737607955933	7.65445709228516	6.89760494232178	6.56083679199219	7.0053653717041	7.17861366271973							+	mU1 NR_mU1	5	5	5	13.4	13.4	13.4	60.705	0	20.016	466320000	8	0.511173	-0.201812	-0.698231	0.103552	0.658362	1.98772	0.405516	-0.251619	-0.894476	NaN	0	NaN	0.00827745	-0.909981	-4.22632	Q9EP89
7.83105659484863	7.79734373092651	7.74719429016113	7.88629341125488	6.89582777023315	8.04214191436768	7.76525115966797	7.77760076522827	8.66170883178711	7.71422052383423	7.38750886917114	8.05667591094971	7.81895780563354	8.13965892791748	8.07236003875732			+	mU1 NR_WT					7	7	7	37.3	37.3	37.3	35.31	0	41.464	1828300000	32	0.466942	-0.195267	-0.776517	0.75575	0.105674	0.328634	0.0345814	0.206441	2.72134	0.172428	0.401708	1.54869	0.772563	0.100767	0.305126	Q9EPB5
10.091983795166	10.0834665298462	10.1913108825684	9.96292304992676	10.2308320999146	10.1536321640015	10.2671947479248	10.2574863433838	9.92183685302734	10.1573657989502	9.83389282226563	10.2265224456787	10.205041885376	10.2274236679077	10.0390968322754	+			WT NR_WT					45	45	45	72.5	72.5	72.5	57.915	0	323.31	220360000000	737	0.0348873	0.144865	2.71471	0.306841	-0.111389	-1.13761	0.207454	0.0921001	1.4127	0.351237	-0.0527651	-1.01054	0.0901095	0.203489	2.09688	Q9EQ20
7.89820384979248	7.64160299301147	7.49804830551147	7.95754480361938	7.93750762939453	7.87811374664307	7.93309736251831	7.86536455154419	6.87721920013428	7.83480215072632	7.6313624382019	7.83948421478271	7.78378200531006	7.87875175476074	7.40077972412109									6	6	6	31.4	31.4	31.4	32.131	0	25.189	924650000	29	0.208209	0.154671	1.41001	0.323901	-0.301055	-1.09384	0.885629	-0.0231506	-0.150068	0.162177	-0.177821	-1.59341	0.360669	0.277905	1.00582	Q9EQI8
8.02189159393311	8.03314208984375	7.96537113189697	7.87597513198853	7.85391092300415	7.93534088134766	8.03694820404053	7.74613571166992	8.2846565246582	7.96945333480835	7.96292781829834	8.05288600921631	7.95278739929199	8.15283870697021	8.07062911987305									4	4	4	15.9	15.9	15.9	36.365	0	17.71	1618700000	42	0.299501	-0.0810111	-1.13544	0.364191	0.0982509	0.997786	0.178167	0.0831903	1.52473	0.0685304	0.164201	2.21647	0.887574	-0.0150606	-0.148736	Q9ERI6
9.44251155853271	9.34840202331543	9.30862808227539	9.02865219116211	9.2876672744751	9.28974533081055	9.3574390411377	9.39052867889404	8.83138370513916	9.17452526092529	8.69220352172852	9.18406677246094	9.26693725585938	9.31550884246826	9.0316104888916									15	15	15	68.1	68.1	68.1	16.859	0	99.982	31596000000	232	0.613591	0.0492966	0.532381	0.0617877	-0.382678	-2.39781	0.476097	-0.0825176	-0.759909	0.0976427	-0.131814	-1.96039	0.0860383	0.30016	2.13335	Q9ERS2
8.12136268615723	8.12237930297852	8.1578197479248	8.08246231079102	8.06851959228516	8.14298343658447	8.08962249755859	8.03478908538818	7.71312093734741	8.0632209777832	8.48611831665039	8.08123970031738	7.85760402679443	8.02649211883545	8.08357429504395									6	6	6	18.5	18.5	18.5	41.251	0	17.682	1807900000	35	0.225435	-0.0370274	-1.35093	0.86539	-0.0335193	-0.178429	0.0971415	-0.108778	-1.9641	0.261047	-0.0717511	-1.24064	0.718524	-0.0752592	-0.381475	Q9ES82
7.55188894271851	7.43394565582275	7.4157075881958	7.44420099258423	6.62843561172485	7.06237745285034	6.41088724136353	7.42327880859375	7.16060400009155	7.33039331436157	7.23233413696289	7.45797252655029	7.52826070785522	7.65451335906982	6.54712247848511	+	+		mU1_WT;WT NR_WT					3	3	3	7.3	7.3	7.3	41.015	0	10.284	314340000	13	0.0437154	-0.580191	-2.54618	0.0102055	-0.220325	-4.01158	0.542941	-0.164469	-0.644747	0.266365	0.415722	1.22533	0.860734	0.0558568	0.184684	Q9ES83
7.74356460571289	7.68890905380249	7.96798276901245	7.35216331481934	7.5757303237915	7.65116167068481	8.03630924224854	7.91053915023804	7.6630973815918	7.96148777008057	7.47431087493896	7.83837032318115	7.83234930038452	7.96177673339844	7.81907653808594									7	7	7	5.3	5.3	5.3	237.91	0	27.836	942750000	21	0.551622	0.10528	0.630481	0.954575	0.0114771	0.059875	0.2322	0.174738	1.32884	0.561765	0.0694581	0.613988	0.248341	0.163261	1.3062	Q9ESD7
8.47500228881836	8.41356754302979	8.51798725128174	8.52886486053467	8.4171895980835	8.57816886901855	8.46016120910645	8.56070709228516	8.53746604919434	8.4805965423584	8.35525989532471	8.49946689605713	8.19763851165771	8.55384635925293	8.49349975585938									12	12	12	41.3	41.3	41.3	46.975	0	74.93	4586900000	71	0.681646	0.0202012	0.43082	0.653263	-0.0260813	-0.477329	0.593738	-0.0477426	-0.563148	0.476716	-0.0679438	-0.758794	0.845433	-0.0216613	-0.205302	Q9ESW4
9.19832706451416	9.32105922698975	9.38107872009277	9.44410705566406	9.22385883331299	9.30646800994873	9.24027442932129	9.08817195892334	9.32559776306152	9.35453128814697	9.25565814971924	9.42970371246338	9.42628383636475	9.33413219451904	9.19108772277832									21	21	21	63.7	63.7	63.7	46.325	0	293.68	26114000000	279	0.131426	-0.12145	-1.74594	0.731196	-0.0242139	-0.363356	0.908777	0.00915885	0.119504	0.120934	0.130609	1.80605	0.656463	0.0333728	0.472517	Q9JHI5
7.62776517868042	7.59876871109009	7.65055990219116	7.62301158905029	7.58063983917236	7.52535581588745	7.63226509094238	7.86081075668335	8.05407619476318	7.76994562149048	7.65630054473877	7.69060373306274	7.65590620040894	7.66194534301758	8.00164699554443									5	5	5	11.2	11.2	11.2	69.228	0	9.5827	823010000	13	0.750843	0.0247415	0.332469	0.0990851	0.201748	2.02225	0.180107	0.127499	1.5168	0.391323	0.102758	0.923604	0.617952	-0.0742486	-0.531308	Q9JHS4
8.51970958709717	8.69771766662598	8.69031143188477	8.48905849456787	8.70455360412598	8.64129543304443	8.53820896148682	8.64218711853027	8.57936096191406	8.65132617950439	8.27678298950195	8.64262294769287	8.51412296295166	8.6215705871582	8.61555004119873									16	16	16	68.5	68.5	68.5	30.501	0	106.03	5949500000	129	0.636313	0.032362	0.497842	0.442675	-0.0967093	-0.83325	0.990976	-0.00073266	-0.0117893	0.488432	-0.0330946	-0.737878	0.389238	0.0959766	0.942443	Q9JHW2
8.82035255432129	8.77469253540039	8.74481678009033	8.63698863983154	8.85218143463135	8.75370597839355	8.86332321166992	8.93195629119873	8.71675395965576	8.73602962493896	8.87899875640869	8.87202835083008	8.72892951965332	8.84615135192871	8.94205760955811									19	19	19	34.1	34.1	34.1	77.187	0	134.5	8878500000	130	0.0948392	0.106079	1.9814	0.621874	0.0330482	0.525228	0.131424	0.103079	1.74595	0.960134	-0.00300002	-0.0521089	0.348516	0.0700309	1.03404	Q9JI39
7.58438777923584	7.74588632583618	7.74554300308228	7.82376766204834	7.29296445846558	7.435302734375	7.65994453430176	7.54381990432739	7.46037149429321	7.78477430343628	7.60094356536865	7.54832792282104	7.21101379394531	7.72989320755005	7.56367111206055	+			WT NR_WT					4	4	4	17	17	17	25.826	0	18.179	612100000	39	0.0406064	-0.241888	-2.60102	0.317122	-0.109533	-1.11099	0.127872	-0.21167	-1.76576	0.829058	0.0302186	0.225523	0.528347	-0.102137	-0.677187	Q9JIK9
8.18289947509766	8.0906457901001	8.26686668395996	8.14391994476318	8.26171493530273	8.13225936889648	8.43600368499756	8.45760917663574	8.52547264099121	8.34078121185303	8.24395561218262	8.42959117889404	8.35652256011963	8.37553596496582	8.52457809448242			+	mU1 NR_WT					10	10	10	31.7	31.7	31.7	49.348	0	36.038	3054900000	51	0.127882	0.150814	1.7657	0.0593163	0.198987	2.43088	0.00320059	0.250474	4.73722	0.288813	0.0996602	1.16346	0.55863	0.0514871	0.626244	Q9JIY5;A2RT60
8.35125541687012	8.404372215271	8.45686721801758	8.26822662353516	8.31720638275146	8.297607421875	8.28402423858643	8.36780261993408	8.41074371337891	8.30297946929932	7.96175336837769	8.41054058074951	8.13142585754395	8.39574527740479	8.52202701568604									13	13	13	39.2	39.2	39.2	58.316	0	67.42	3430100000	62	0.271811	-0.0535202	-1.20992	0.290831	-0.145022	-1.18068	0.956404	-0.00524569	-0.0569897	0.589798	0.0482745	0.569324	0.393347	0.139776	0.93364	Q9JJL8
9.15250205993652	9.08303642272949	9.172194480896	9.06299495697021	9.2728853225708	9.21869277954102	9.06788921356201	9.23459339141846	9.04107666015625	9.10984802246094	8.87085437774658	9.27953052520752	9.14612770080566	9.23185157775879	9.09138584136963									20	20	19	60.7	60.7	58.5	46.04	0	197.28	23222000000	224	0.172352	0.0808332	1.54901	0.16101	-0.110422	-1.64442	0.212065	0.0695419	1.39641	0.860832	-0.0112913	-0.18299	0.068214	0.179964	2.31811	Q9JK42
8.64059066772461	8.64210796356201	8.63809013366699	8.47306346893311	8.84182834625244	8.73320484161377	8.68438720703125	8.70585536956787	8.35214424133301	8.57145214080811	8.45469284057617	8.77374267578125	8.746657371521	8.76456451416016	8.68917560577393	+		+	mU1 NR_WT;WT NR_WT			+	mU1 NR_mU1	8	8	8	59.5	59.5	59.5	20.733	0	82.513	6590500000	118	0.0395199	0.142856	2.62125	0.113271	-0.139033	-1.91764	0.0195696	0.145072	3.15982	0.957379	0.0022161	0.0557134	0.0043386	0.284105	4.93558	Q9JKL4
7.7548680305481	7.69989824295044	7.91529941558838	7.56489086151123	7.40736961364746	7.39390850067139	7.80811643600464	7.64752960205078	7.7857780456543	7.70386695861816	7.97728776931763	7.51579427719116	7.3770694732666	7.6259913444519	7.71565246582031									3	3	3	5	5	5	76.431	0	10.615	703700000	12	0.219072	-0.169508	-1.37226	0.454661	0.0885718	0.810163	0.139694	-0.175112	-1.70179	0.965373	-0.00560415	-0.0452543	0.0615395	-0.263684	-2.40107	Q9JKS4
7.79422283172607	7.80017375946045	7.99245166778564	7.97040748596191	7.68817949295044	7.38715839385986	7.84055137634277	7.86095476150513	7.80661392211914	7.96815586090088	6.98483848571777	7.92578125	7.84951162338257	7.83744335174561	7.65607881546021									6	6	6	21.3	21.3	21.3	53.514	0	39.532	980000000	31	0.160031	-0.195103	-1.60311	0.300755	-0.302778	-1.15375	0.392103	-0.0721102	-0.921982	0.357405	0.122993	0.996673	0.421476	0.230668	0.875268	Q9JLJ2
7.53206586837769	6.73936891555786	7.51533079147339	7.41023731231689	7.52847957611084	7.11876058578491	7.45586442947388	7.41783714294434	7.51921081542969	7.53937721252441	7.16826009750366	7.45934724807739	7.40927362442017	7.19237232208252	7.24625253677368									4	4	4	46.3	46.3	46.3	10.425	0	34.318	375870000	21	0.711765	0.0809847	0.387492	0.672855	0.109699	0.448063	0.894423	0.0275607	0.138438	0.645769	-0.053424	-0.483664	0.543175	-0.0821379	-0.652009	Q9JLR9
9.09092807769775	9.06292057037354	9.14752197265625	8.91310882568359	9.35403156280518	9.35667610168457	9.19752883911133	9.28645610809326	9.16259384155273	9.1108922958374	9.12703990936279	9.30850028991699	9.27911949157715	9.13962745666504	9.22136211395264	+		+	mU1 NR_WT;WT NR_WT					20	20	20	54.8	54.8	54.8	56.602	0	265.18	21155000000	194	0.00778409	0.245053	3.922	0.244311	0.0798888	1.31911	0.0258285	0.183532	2.94354	0.287955	-0.0615208	-1.16575	0.0732628	0.103644	2.26097	Q9JLT4;Q9JMH6
7.57578802108765	7.54232740402222	7.44751453399658	7.70664930343628	7.56040859222412	7.81795501708984	7.42866945266724	7.48543739318848	7.88245630264282	7.52121639251709	7.25427722930908	7.5782151222229	7.53898811340332	7.60001420974731	7.50381803512573									4	4	4	16.2	16.2	16.2	33.395	0.0013021	7.4529	642130000	9	0.961872	0.0050478	0.0498343	0.929156	-0.0154198	-0.0934757	0.831553	-0.0128109	-0.222167	0.846837	-0.0178587	-0.201672	0.987169	0.0026089	0.0169015	Q9JLZ3
7.88827514648438	7.70628261566162	7.75843477249146	7.76146173477173	7.71464824676514	7.64173173904419	7.82798910140991	7.68166637420654	7.93899965286255	7.70175790786743	7.93638801574707	7.73547124862671	7.51259088516235	7.85943841934204	7.80893993377686									6	6	6	33.7	33.7	33.7	21.782	0	12.625	841320000	26	0.307311	-0.0621047	-1.1155	0.361697	0.080435	1.00347	0.584735	-0.0495034	-0.577295	0.888779	0.0126013	0.145899	0.298109	-0.129938	-1.16085	Q9QUI0;Q62159;P62746
9.68078899383545	9.73085498809814	9.71346569061279	9.69290828704834	9.69886589050293	9.72240352630615	9.78328132629395	9.73762989044189	9.83634281158447	9.74505138397217	10.0874624252319	9.68525791168213	9.66223812103271	9.70162868499756	9.79917526245117									46	39	39	71.2	66.3	66.3	74.466	0	323.31	94116000000	471	0.189154	0.0310407	1.48083	0.0857047	0.185114	2.13642	0.821436	0.00757051	0.235793	0.527439	-0.0234702	-0.670585	0.113849	-0.177544	-1.91367	Q9QXX4
9.186448097229	9.14650058746338	9.052809715271	9.09864330291748	9.14909553527832	9.22130966186523	9.05808448791504	9.07783985137939	9.04925632476807	9.08231830596924	9.94156074523926	9.09756946563721	9.00638008117676	9.13286781311035	9.15968704223633									19	19	19	53.5	53.5	53.5	37.895	0	323.31	17124000000	221	0.911159	0.00548196	0.116367	0.381673	0.236611	0.958844	0.637121	-0.0219743	-0.496626	0.602494	-0.0274563	-0.549508	0.34407	-0.258586	-1.04457	Q9QYA2
9.43906402587891	9.19788646697998	9.21716785430908	9.02056884765625	9.19214916229248	9.25520038604736	9.36046123504639	9.34995746612549	8.78809070587158	9.18514537811279	9.2603816986084	9.23345279693604	9.15923595428467	9.31712245941162	9.28907585144043									15	15	15	63.3	63.3	63.3	40.789	0	276.86	25579000000	256	0.483083	0.0707703	0.747383	0.416769	-0.140799	-0.884819	0.748684	0.03105	0.335478	0.483049	-0.0397203	-0.747444	0.241288	0.171849	1.32892	Q9QYG0
9.76553440093994	9.7797908782959	9.72768783569336	9.58658695220947	9.28182888031006	9.40491962432861	9.35949420928955	9.4885082244873	10.374436378479	9.71270847320557	9.3912525177002	9.46884918212891	9.13404941558838	9.29110240936279	10.0305185317993	+			WT NR_WT					29	29	14	62	62	35.5	49.656	0	323.31	98725000000	301	0.00172621	-0.331212	-5.36116	0.672217	0.111232	0.449009	0.287684	-0.23377	-1.16648	0.643719	0.0974422	0.486728	0.350122	-0.345003	-1.03026	Q9QYR9
8.11005115509033	8.07368183135986	8.22305488586426	8.10154056549072	8.07903671264648	8.03124713897705	8.19912433624268	8.17556953430176	8.42931652069092	8.12146091461182	7.92165040969849	8.23474502563477	8.03059959411621	8.31147861480713	8.34242248535156									6	6	6	20.4	20.4	20.4	28.567	0	75.479	2315300000	42	0.91355	-0.00583768	-0.113219	0.82379	0.0303938	0.234646	0.233198	0.102729	1.32563	0.226635	0.108567	1.34697	0.647506	0.0723355	0.486017	Q9QZ23
7.72015953063965	7.80619335174561	7.74583959579468	7.63937711715698	7.58478355407715	7.36515092849731	7.75057792663574	7.94102430343628	7.90761566162109	7.81434726715088	7.71717071533203	7.8043098449707	7.64011335372925	7.60028648376465	7.70453643798828									4	4	4	20.2	20.2	20.2	31.715	0	56.477	800920000	38	0.614636	-0.0675082	-0.530777	0.225185	0.0851521	1.38318	0.498674	-0.0405809	-0.719871	0.843045	0.0269274	0.206747	0.132127	-0.125733	-1.79782	Q9QZD8
7.79311943054199	7.82521200180054	7.72270774841309	7.91522026062012	8.08568286895752	8.20229721069336	7.61652803421021	7.83773374557495	6.94605779647827	7.8969669342041	7.86317777633667	7.73137903213501	7.89419412612915	7.94525671005249	7.73980951309204									8	8	8	21.7	21.7	21.7	61.359	0	19.529	1024200000	15	0.408277	0.121496	0.888903	0.39682	-0.245331	-0.926259	0.846634	0.013595	0.201943	0.474645	-0.107901	-0.762527	0.378976	0.258926	0.964756	Q9QZF2
7.55165719985962	7.73923206329346	7.77475070953369	7.66360664367676	7.01718187332153	7.31877279281616	7.21617603302002	7.48076868057251	7.95530271530151	7.98491430282593	7.61012697219849	7.02556180953979	6.5279655456543	7.79036951065063	7.62952184677124	+			WT NR_WT					3	3	3	9.2	9.2	9.2	49.798	0.001233	6.1691	676620000	9	0.00803138	-0.424087	-3.89487	0.208818	0.167803	1.44222	0.185949	-0.438957	-1.49338	0.962769	-0.0148702	-0.0486604	0.15025	-0.60676	-1.69807	Q9QZH6
7.95836305618286	7.83884906768799	7.84914302825928	7.75603485107422	6.97372245788574	8.0945405960083	7.97355270385742	7.8770604133606	6.66205215454102	7.93775367736816	8.30089950561523	7.93376064300537	7.98108434677124	7.30818128585815	7.29457712173462									8	8	8	18.3	18.3	18.3	67.669	0	24.286	1155200000	14	0.657467	-0.120878	-0.466274	0.626306	-0.217029	-0.518384	0.297993	-0.221197	-1.13935	0.763458	-0.100318	-0.314959	0.993303	-0.0041676	-0.00882104	Q9R069
8.44669246673584	8.56174564361572	8.57748031616211	8.43784523010254	8.62712001800537	8.60287380218506	8.46289157867432	8.59145450592041	8.94671726226807	8.51654815673828	8.02131366729736	8.43191051483154	8.36385631561279	8.4356689453125	8.70980358123779									16	16	16	42.1	42.1	42.1	50.56	0	81.064	6950200000	128	0.258226	0.0651441	1.24888	0.963106	-0.0110812	-0.0486185	0.816456	-0.0206311	-0.242518	0.351957	-0.0857751	-1.00891	0.969971	-0.00954986	-0.0395657	Q9R0X4;Q32MW3
8.96478271484375	8.94936561584473	8.98970794677734	8.99072074890137	8.9246826171875	8.9201021194458	8.98152446746826	9.06404590606689	8.61727333068848	9.01224613189697	8.88515186309814	9.0375862121582	8.90279102325439	8.97245311737061	8.73715305328369									27	27	27	55.6	55.6	55.6	50.282	0	128.84	12075000000	256	0.976929	-0.00105548	-0.0301445	0.226061	-0.13542	-1.38014	0.385764	-0.0611484	-0.935233	0.440617	-0.0600929	-0.825597	0.574724	0.0742721	0.599896	Q9R112
7.46542739868164	7.4581995010376	7.51102733612061	6.20818662643433	6.56224298477173	7.6093168258667	7.62239027023315	7.65620374679565	7.85866928100586	7.50330018997192	7.7499475479126	7.57963514328003	7.50116872787476	7.42489814758301	7.91366529464722									3	3	3	28.9	28.9	28.9	21.067	0	14.557	531440000	9	0.643968	0.201828	0.486355	0.218415	0.543262	1.40709	0.233739	0.444132	1.32389	0.432177	0.242303	0.841779	0.550165	-0.0991305	-0.640297	Q9R257
7.88579082489014	8.09781265258789	7.92386531829834	7.91976308822632	8.0242805480957	7.89033699035645	7.83040237426758	7.82037210464478	8.58548355102539	7.95125484466553	7.87153387069702	7.97672605514526	7.91348552703857	8.00987529754639	8.01342678070068									10	10	10	47.7	47.7	47.7	26.468	0	53.388	1836300000	25	0.366043	-0.06546	-0.977565	0.405076	0.179283	0.908914	0.698596	0.0215704	0.40633	0.147336	0.0870304	1.66318	0.446455	-0.157712	-0.825919	Q9WTP6
8.55291175842285	8.56314849853516	8.58163070678711	8.50171661376953	8.41607475280762	8.24716281890869	8.48197269439697	8.38264751434326	8.7107515335083	8.55648326873779	8.63615703582764	8.49575233459473	8.35483837127686	8.43357753753662	8.57564926147461	+			WT NR_WT					15	15	15	69.2	69.2	69.2	25.426	0	134.68	4983200000	67	0.0183953	-0.167887	-3.20878	0.10258	0.0846121	1.99509	0.139475	-0.0848975	-1.70293	0.268705	0.0829899	1.21867	0.05198	-0.16951	-2.53864	Q9WTP7
7.93222522735596	7.95898866653442	7.99924802780151	7.87521171569824	7.96203279495239	8.1303014755249	8.00932312011719	7.85240077972412	8.0509204864502	8.05207824707031	7.55243015289307	8.08274936676025	7.88861179351807	7.88434791564941	7.89850044250488									5	5	5	25.4	25.4	25.4	21.978	0	19.707	1712200000	42	0.484115	0.0470961	0.745544	0.709279	-0.0562754	-0.394785	0.959939	-0.00286603	-0.0523627	0.530348	-0.0499622	-0.665699	0.736985	0.0534094	0.355125	Q9WTQ8
8.34026527404785	8.4466609954834	8.31439399719238	8.19420909881592	8.48298740386963	8.36927127838135	8.52290058135986	8.25777435302734	7.62261819839478	8.21090698242188	8.09673595428467	8.14038276672363	8.32498168945313	8.53916358947754	8.00842952728271									8	8	8	16.4	16.4	16.4	78.185	0	29.579	2956900000	47	0.327443	0.0843511	1.06597	0.0860099	-0.347129	-2.13361	0.596554	-0.0706429	-0.558749	0.277806	-0.154994	-1.19326	0.231907	0.276486	1.36011	Q9WTR5
8.11350917816162	7.97746753692627	8.17184352874756	8.01275253295898	7.80999040603638	7.85342454910278	8.31181716918945	8.35403156280518	8.12810802459717	8.30975818634033	7.9992995262146	8.07878303527832	8.03140830993652	8.28434085845947	8.26749992370605									6	6	6	17.5	17.5	17.5	68.035	0	42.131	1946100000	27	0.932494	0.0134227	0.0883226	0.442343	0.0768287	0.833895	0.26499	0.0966148	1.22926	0.619408	0.0831921	0.523473	0.860945	0.0197861	0.1844	Q9WU79
8.25200271606445	8.29800128936768	8.38041019439697	8.57393836975098	7.69399929046631	7.66877698898315	8.26436901092529	8.15475845336914	8.45184803009033	8.11816501617432	8.49844837188721	7.80490255355835	7.96412754058838	8.15884494781494	8.46428108215332	+			WT NR_WT					11	11	7	17.8	17.8	12.1	97.285	0	56.207	2706700000	58	0.0443127	-0.430612	-2.53611	0.88485	-0.0199343	-0.152374	0.130386	-0.278049	-1.75169	0.494024	0.152563	0.728015	0.244032	-0.258115	-1.32001	Q9WUB3
10.1385555267334	10.2581100463867	10.2832336425781	10.2279376983643	10.2612867355347	10.3298044204712	10.3303327560425	10.2004127502441	10.1649475097656	10.2761631011963	10.4583358764648	10.3960599899292	10.2154521942139	10.442400932312	10.4327611923218									25	25	25	46.5	46.5	46.5	36.154	0	323.31	295060000000	813	0.273535	0.0534999	1.2051	0.408053	0.0728563	0.902727	0.0574299	0.144709	2.34525	0.188761	0.0912094	1.48236	0.484213	0.0718531	0.755108	Q9WUM5
8.76394462585449	8.78193473815918	8.8357982635498	8.64402484893799	9.01304817199707	9.03035640716553	8.78490924835205	8.90958786010742	8.85005760192871	8.83500576019287	8.26752376556396	8.87677192687988	8.70824241638184	8.86390590667725	8.83850288391113	+			WT NR_WT					14	14	14	41.7	41.7	41.7	43.267	0	121.84	11522000000	114	0.0428448	0.17805	2.56111	0.55598	-0.105563	-0.630628	0.28684	0.0654302	1.16873	0.151319	-0.11262	-1.64381	0.352337	0.170993	1.02508	Q9WUR2;Q78JN3
8.369215965271	8.41460609436035	8.74182891845703	8.5627326965332	8.39537906646729	8.40638732910156	8.54272556304932	8.50153827667236	8.69909191131592	8.64800834655762	8.22631645202637	8.51854038238525	8.53863620758057	8.75263977050781	8.56081485748291									6	6	6	33.2	33.2	33.2	25.061	0	20.42	5584400000	70	0.532464	-0.0605884	-0.662157	0.988727	0.00237632	0.0148492	0.506679	0.0705619	0.705971	0.0900137	0.13115	2.01909	0.648418	0.0681856	0.484637	Q9WUR9
6.69348955154419	6.68166637420654	7.50201368331909	6.70238351821899	7.43962097167969	6.42177057266235	6.96119785308838	6.96733713150024	6.82671594619751	6.81099843978882	7.16123056411743	7.36154937744141	6.60608673095703	7.06959390640259	6.86214923858643									3	3	3	11.8	11.8	11.8	33.996	0.002401	5.6807	97838000	10	0.86217	0.0525934	0.181209	0.888332	0.0380934	0.147726	0.767128	0.0799565	0.309886	0.920351	0.0273632	0.104273	0.851283	0.0418632	0.197407	Q9WUU7
7.59264278411865	7.57141780853271	8.14438724517822	7.81896448135376	7.32213640213013	7.51620483398438	8.03690814971924	7.96451902389526	7.96144962310791	8.07003784179688	8.47754096984863	7.30513620376587	7.54202842712402	7.84952402114868	8.41028785705566									5	5	5	15.7	15.7	15.7	44.669	0	25.384	1318400000	39	0.753179	-0.071911	-0.329219	0.11738	0.387823	1.88987	0.985698	-0.00510895	-0.0186857	0.828332	0.066802	0.226499	0.262943	-0.392932	-1.26101	Q9WV54
6.75101709365845	7.80403709411621	8.04253578186035	7.80389404296875	7.75931262969971	7.12511825561523	7.82849216461182	7.81396102905273	7.30123805999756	7.8530592918396	7.62442684173584	7.83382892608643	7.6629467010498	7.77691888809204	7.92315053939819									4	4	4	44.3	44.3	44.3	11.042	0	30.344	936470000	14	0.928434	0.03135	0.0936528	0.984557	-0.00746294	-0.0203431	0.523686	0.19884	0.676913	0.383209	0.16749	0.940619	0.223815	0.206303	1.38797	Q9WVA2;Q4FZG7
6.85727262496948	7.63499069213867	7.07298469543457	7.52035665512085	6.31801843643188	7.6036205291748	6.54412698745728	6.99689197540283	6.85531616210938	6.54650402069092	7.75120830535889	6.74766635894775	6.75105381011963	6.81345510482788	7.01198959350586									8	8	8	30.9	30.9	30.9	32.823	0	18.394	546440000	7	0.275099	-0.405737	-1.20075	0.579633	-0.220392	-0.591952	0.0636365	-0.44036	-2.27036	0.908966	-0.0346233	-0.119255	NaN	0	NaN	Q9WVD5
7.90795946121216	8.08496952056885	8.50029182434082	8.35698127746582	8.06669807434082	8.05564594268799	8.36642265319824	8.37551689147949	8.01173973083496	8.41828441619873	8.58710479736328	8.21157455444336	8.07682228088379	8.17111206054688	8.51865863800049									5	5	5	17.4	17.4	17.4	51.813	0	41.476	2645400000	26	0.983203	0.00352037	0.0219458	0.57787	0.126492	0.594801	0.85171	0.0319914	0.195159	0.835107	0.028471	0.217392	0.626208	-0.0945011	-0.518534	Q9WVJ3
8.01820087432861	8.13113689422607	8.07129287719727	7.96438217163086	7.81066274642944	7.66510248184204	8.11203479766846	8.04273319244385	8.23849773406982	8.00414943695068	8.53663444519043	7.90225315093994	7.89387845993042	7.91530990600586	8.31896018981934									10	10	10	67.1	67.1	67.1	24.275	0	52.271	1549600000	46	0.252019	-0.13862	-1.26728	0.176365	0.213507	1.57372	0.736975	-0.0386528	-0.351855	0.520623	0.0999671	0.682101	0.216032	-0.25216	-1.41568	Q9WVL0
6.70962810516357	7.59534168243408	7.40246772766113	7.41873216629028	7.55791616439819	7.32475566864014	7.45629024505615	7.45336437225342	7.27392673492432	7.46154356002808	7.03032159805298	7.73300457000732	7.4489688873291	7.28602981567383	7.27388048171997									3	3	3	10.1	10.1	10.1	37.505	0	9.4462	416090000	11	0.439761	0.166539	0.827227	0.921586	-0.0262785	-0.103505	0.515625	0.153929	0.690607	0.917744	-0.0126107	-0.107701	0.322025	0.180207	1.09855	Q9WVT6
7.90789461135864	7.59907484054565	8.04095840454102	8.05207824707031	7.70710134506226	7.54664134979248	7.98746061325073	7.78528022766113	7.90331792831421	7.86400032043457	7.87454891204834	7.86823892593384	6.82000112533569	7.63060092926025	8.07118225097656									3	3	3	31.6	31.6	31.6	18.111	0	51.112	1065600000	11	0.344385	-0.143381	-1.02618	0.883082	-0.0193791	-0.154736	0.343134	-0.302496	-1.02907	0.602104	-0.159115	-0.550112	0.42323	-0.283117	-0.871732	Q9Z0V8
9.50636959075928	9.60035228729248	9.71360778808594	9.57499122619629	9.67818164825439	9.6318998336792	9.64842796325684	9.69661808013916	9.5603494644165	9.68493461608887	9.61386299133301	9.68398284912109	9.66235160827637	9.65388774871826	9.65877437591553									35	35	35	56.4	56.4	56.4	66.765	0	323.31	67762000000	536	0.203251	0.0649517	1.42785	0.738899	0.0208855	0.352409	0.181407	0.0659189	1.51153	0.953721	0.000967264	0.060502	0.208455	0.0450335	1.44358	Q9Z0X1
6.62526082992554	6.27387428283691	6.60419368743896	6.43024921417236	6.47655391693115	7.07957792282104	6.58396911621094	6.43117046356201	9.44007396697998	6.68566989898682	7.30187129974365	6.51168298721313	6.71556282043457	6.60075521469116	8.42337703704834									22	22	22	31.4	31.4	31.4	87.265	0	156.95	4332300000	41	0.385385	0.159423	0.936028	0.118811	1.32581	1.88043	0.257162	0.57945	1.25201	0.414463	0.420027	0.876512	0.436065	-0.746361	-0.846183	Q9Z110
6.45862913131714	7.35017061233521	7.13738584518433	7.12434101104736	7.27714824676514	7.21841096878052	6.58356428146362	7.18221473693848	6.68963813781738	6.88933372497559	7.49032688140869	6.59513139724731	6.99679946899414	7.12116575241089	7.24290561676025									2	2	2	20	20	20	11.243	0.0023419	5.147	117300000	3	0.856176	0.0477029	0.189197	0.98638	0.00546793	0.0179408	0.908587	-0.0286311	-0.119754	0.733902	-0.076334	-0.35617	0.9012	-0.034099	-0.130578	Q9Z126
8.15588188171387	8.29263305664063	8.37861633300781	8.46073246002197	8.73128223419189	8.63589572906494	8.32733821868896	8.29714775085449	8.2838659286499	8.4230489730835	8.18957424163818	8.40913772583008	8.47630977630615	8.45862293243408	8.1954288482666									14	14	14	42.3	42.3	42.3	50.569	0	68.899	3847300000	73	0.215499	0.17595	1.38449	0.81857	-0.0231362	-0.241759	0.518871	0.0629089	0.685077	0.407269	-0.113041	-0.890934	0.408038	0.0860451	0.902758	Q9Z1J3
8.4159574508667	8.43844699859619	8.32393264770508	8.42657661437988	8.41838455200195	8.60651016235352	8.15262508392334	8.08863258361816	7.76037740707397	8.30702495574951	8.10839557647705	8.32913303375244	8.19972801208496	8.40176200866699	7.95287466049194									10	10	10	64.6	64.6	64.6	12.575	0	35.78	3404400000	102	0.516766	-0.0846903	-0.68866	0.0546724	-0.342629	-2.49727	0.127548	-0.180354	-1.76759	0.560893	-0.0956637	-0.615399	0.402362	0.162275	0.914583	Q9Z1P6
8.30612468719482	6.44818687438965	6.67730188369751	8.33150863647461	6.61697101593018	7.04803848266602	8.13874435424805	8.1841516494751	8.73508739471436	8.02690124511719	7.62237024307251	8.08611011505127	8.33635997772217	8.07558345794678	8.34740829467773									4	4	4	24.8	24.8	24.8	26.87	0	12.426	2705100000	9	0.933261	0.0561959	0.0873172	0.346043	0.687339	1.03988	0.184974	0.770585	1.49724	0.125007	0.714389	1.78213	0.782923	0.0832458	0.290741	Q9Z2G9
8.61578178405762	8.50491905212402	8.74995994567871	8.72986888885498	8.52876281738281	8.48519611358643	8.88537216186523	8.85260772705078	9.06118869781494	8.74209594726563	8.72640895843506	8.62309455871582	8.59645462036133	8.82085800170898	8.84379291534424									17	17	17	29.3	29.3	29.3	82.988	0	121.47	8199800000	71	0.762003	0.0378523	0.316973	0.148958	0.193099	1.70477	0.441092	0.0709176	0.824693	0.797685	0.0330653	0.267987	0.351896	-0.122181	-1.02611	Q9Z2I0
9.13043022155762	9.09819316864014	9.11945343017578	9.00719261169434	8.89058876037598	8.80987644195557	9.12600135803223	9.10493087768555	9.50501441955566	9.07594776153564	8.82712364196777	9.11935520172119	9.07827568054199	9.18267154693604	9.29331874847412									22	22	22	52.7	52.7	52.7	46.839	0	220.34	22435000000	162	0.250361	-0.105968	-1.27226	0.791073	0.0472112	0.279474	0.195113	0.0795879	1.458	0.0885415	0.185556	2.031	0.860234	0.0323767	0.185356	Q9Z2I8
9.97014713287354	10.0664005279541	10.0244855880737	10.0549955368042	10.2995290756226	10.3247966766357	10.1167736053467	10.0083875656128	10.1989593505859	10.0388984680176	10.0321350097656	10.2474575042725	10.2378702163696	10.2395496368408	10.0622062683105			+	mU1 NR_WT					49	49	49	74.5	74.5	74.5	50.113	0	323.31	221450000000	847	0.0903905	0.158365	2.01608	0.295638	0.0609904	1.16753	0.0150595	0.167764	3.36908	0.918314	0.00939918	0.106951	0.187815	0.106773	1.52483	Q9Z2I9
7.72018432617188	6.38168859481812	6.87017726898193	6.74750375747681	7.73899459838867	7.42865324020386	7.95740604400635	8.07525444030762	7.09416341781616	6.60935115814209	7.71898460388184	6.50415992736816	7.98312997817993	6.57555675506592	6.76394271850586	+			WT NR_WT					3	3	3	29.6	29.6	29.6	24.301	0	27.003	726260000	9	0.0334194	0.870189	2.74711	0.644089	0.210945	0.491193	0.954171	0.0268089	0.0599128	0.0652563	-0.84338	-2.25206	0.722598	-0.184136	-0.375633	Q9Z2Q5
8.56578922271729	8.78125286102295	8.43141174316406	7.94795322418213	8.34943294525146	8.49728870391846	8.15051078796387	8.33669948577881	8.56953811645508	8.23297023773193	8.17684364318848	8.64222717285156	8.3867130279541	8.5025634765625	8.52431774139404									6	6	6	16.3	16.3	16.3	52.206	0	10.974	4670400000	25	0.624646	-0.0981188	-0.515491	0.67037	-0.105151	-0.451751	0.670462	0.0823536	0.447141	0.0868403	0.180472	2.04501	0.178433	0.187505	1.56466	Q9Z2W0
7.64473390579224	7.81581020355225	6.78686761856079	6.61679363250732	6.85451173782349	6.78507041931152	6.85953712463379	7.82652187347412	8.06276988983154	6.3934497833252	7.60904550552368	7.11952209472656	6.84714508056641	6.42137432098389	7.11959409713745									4	4	4	19.3	19.3	19.3	30.048	0	10.435	622510000	5	0.742058	-0.134641	-0.344733	0.809918	0.139037	0.253579	0.361148	-0.339142	-0.988349	0.518981	-0.204501	-0.68489	0.346497	-0.478179	-1.03881	Q9Z2Y8
9.71607875823975	9.65262317657471	9.63293266296387	9.73952484130859	9.8430643081665	9.8858585357666	9.74970531463623	9.71992778778076	9.72159671783447	9.64176177978516	9.68290328979492	9.82639217376709	9.79184532165527	9.79225826263428	9.7357349395752	+		+	mU1 NR_WT;WT NR_WT			+	mU1 NR_mU1	33	33	33	97.7	97.7	97.7	33.026	0	279.83	86338000000	503	0.0489176	0.114349	2.46304	0.931881	-0.0032026	-0.0898676	0.0183203	0.101268	3.21202	0.77227	-0.0130813	-0.302794	0.0163665	0.10447	3.55121	Q9Z2Z6
[truncated: 3 more columns]
