# Supplementary material for: Instability in NAD+ metabolism leads to impaired cardiac mitochondrial function and communication
Source: eLife. 2021 Aug 3;10:e59828. doi: 10.7554/eLife.59828 (PMC8331182; doi:10.7554/eLife.59828)
Supplement: Source data 2. [file elife-59828-data2.xlsx]

## Sheet: Sheet1
Source data - table 2
Figure 1; Relative protein levels							Figure 1; NAD+ levels
Genotype	PARP	SIRT3	AcK	Ac-SOD2	Ac-OPA1		Genotype	Heart
Wt	1	1	1	1	1		Wt	19.7403
Wt	0.878555	1.06554	0.721874	0.713512	0.97561		Wt	19.4669
Wt	0.504226	0.963259	0.832925	0.423148	0.987805		Wt	17.3617
Wt	1.80576	0.77679	1.33494	0.478929			Wt	17.8863
mU1	2.07494	1.23054	1.81933	0.868995	2.39431		mU1	14.8973
mU1	2.81228	2.04054	1.53392	1.49886	1.09756		mU1	11.2724
mU1	2.28455	1.54478	2.44427	1.36583	2.36179		mU1	13.4569
mU1			2.72231		2.46341
mU1					1.39431
Ack= Acetylated lysine
AcSOD2= Acetylated SOD2
AcOPA1= Acetylated OPA1
Figure 2; NAD+ levels					Figure 2: Physical data						Figure 2: Echocardiography
Genotype	Treatement	Heart	Liver		Genotype	Treatement	Heart	LV	RV		Genotype	Treatement	IVSd	LVPWd	LVIDd	EF	FS	rwt
Wt		24.8603	1.3382		Wt		5.68594	4.42177	1.11678		Wt		0.049603	0.048942	0.210317	72.8818	41.195	0.465409
Wt		21.9216	1.26054		Wt		5.24305	4.32706	0.915988		Wt		0.041424	0.041424	0.205395	42.5666	20.4482	0.403361
Wt		22.2988	1.25648		Wt		4.98461	4.02797	0.951049		Wt		0.054768	0.04612	0.20562	65.5354	35.2804	0.448598
Wt		23.8591	1.1668		Wt		6.90782	5.35589	1.37106		Wt		0.044202	0.052564	0.237734	70.4655	39.4472	0.442211
Wt		29.6364			Wt		7.80182	6.13326	1.24146		Wt		0.042562	0.051307	0.236129	57.4701	29.8766	0.434568
Wt	NR	23.925	1.39782		Wt		6.20767	4.48363	1.52253		Wt		0.042787	0.034539	0.224758	40.5738	19.4954	0.30734
Wt	NR	22.0357	1.85141		Wt		6.13229	4.92713	1.17152		Wt		0.047092	0.04051	0.2385	51.9192	26.327	0.339703
Wt	NR	21.0859	2.62845		Wt		6.75361	5.11483	1.38361		Wt		0.059845	0.039897	0.233541	42.1309	20.4167	0.341667
Wt	NR	23.4668			Wt		6.19702	4.7079	1.23139		Wt		0.052778	0.043432	0.216058	67.2263	36.6412	0.402036
Wt	NR	15.7572			Wt		7.49283	5.99541	1.28514		Wt		0.048779	0.040956	0.241594	56.0276	28.9524	0.339048
mU1		18.747	1.49145		Wt		6.82472	5.58848	1.06125		Wt		0.059232	0.047924	0.224003	51.5816	25.9615	0.427885
mU1		18.2449	1.23324		Wt		7.7189	6.27373	1.44517		Wt		0.04104	0.050585	0.246719	48.9976	24.5648	0.410058
mU1		20.009	1.33403		Wt		6.2449	4.99709	1.24781		Wt		0.057603	0.051253	0.174169	50.8759	25.5814	0.588542
mU1		19.0368			Wt		6.18829	5.0287	1.062		Wt		0.047421	0.042782	0.225765	55.7025	28.5388	0.378995
mU1		25.0231			Wt		5.63899	4.5282	0.957778		Wt		0.036887	0.039346	0.214356	44.8147	21.7973	0.367113
mU1	NR	25.3629	2.00338		Wt	NR	8.61538	6.90909	1.62238		Wt	NR	0.052121	0.054412	0.255451	58.3598	30.7175	0.426009
mU1	NR	19.8995	1.6209		Wt	NR	5.23581	4.41118	0.875459		Wt	NR	0.039986	0.045357	0.201121	55.1271	27.8932	0.451038
mU1	NR	18.7914	2.71316		Wt	NR	5.29292	3.72486	1.14252		Wt	NR	0.053778	0.04337	0.208174	42.7296	20.5556	0.416667
mU1	NR	15.0131	1.55977		Wt	NR	8.12882	6.02443	1.67685		Wt	NR	0.050025	0.056847	0.238188	53.65	27.4463	0.477327
mU1	NR	20.2848			Wt	NR	7.70909	6.13706	1.44336		Wt	NR	0.049257	0.04353	0.255451	52.233	26.6816	0.340807
					Wt	NR	6.84908	5.20733	1.64175		Wt	NR	0.048519	0.048519	0.231043	41.4121	20	0.42
					Wt	NR	5.9555	4.5522	1.16942		Wt	NR	0.03756	0.04322	0.213014	55.0359	28.0193	0.405797
					Wt	NR	5.98873	4.36056	1.43662		Wt	NR	0.032691	0.059674	0.237141	44.6096	21.8818	0.503282
					Wt	NR	7.1286	5.21243	1.72227		Wt	NR	0.054871	0.056533	0.210615	36.941	17.3684	0.536842
					Wt	NR	5.34081	4.27265	0.926527		Wt	NR	0.04232	0.038211	0.227214	61.1048	32.1881	0.336347
					Wt	NR	5.11131	3.75779	0.96171		Wt	NR	0.037669	0.047453	0.208401	61.7391	32.3944	0.455399
					Wt	NR	5.85366	4.79577	1.0814		Wt	NR	0.044605	0.039809	0.268108	39.2311	18.9624	0.296959
					Wt	NR	5.78306	4.28529	1.19465		Wt	NR	0.036596	0.033811	0.225541	51.9648	26.1023	0.299824
					Wt	NR	6.50342	4.76652	1.61162		Wt	NR	0.049356	0.042988	0.215468	29.0561	13.3005	0.399015
					Wt	NR	5.93796	4.93353	1.00443		Wt	NR	0.039582	0.040887	0.239666	41.3774	19.9637	0.341198
					Wt	NR	6.40443	5.08741	1.17716		Wt	NR	0.056997	0.042187	0.226642	47.7258	23.5644	0.372277
					mU1		7.72662	5.63912	1.49843		mU1		0.054265	0.049924	0.245279	47.1551	23.4513	0.40708
					mU1		13.5081	10.976	2.37591		mU1		0.069832	0.068056	0.204168	59.2712	30.7246	0.666666
					mU1		8.34694	6.42636	1.6784		mU1		0.078835	0.085405	0.235311	32.0462	14.9746	0.725888
					mU1		6.27615	4.8416	1.21937		mU1		0.048474	0.078704	0.225168	54.2706	27.5463	0.699074
					mU1		7.36542	5.3489	1.77727		mU1		0.077635	0.049793	0.234511	57.2038	29.6804	0.424658
					mU1		7.62905	5.64596	1.77311		mU1		0.055205	0.05737	0.222985	32.4475	15.0485	0.514563
					mU1		11.9004	8.72925	2.53578		mU1		0.061667	0.061116	0.257678	15.8259	7.05128	0.474359
					mU1		7.3961	5.52446	1.49845		mU1		0.064895	0.054789	0.20958	40.4514	19.2894	0.522842
					mU1	NR	7.52389	6.07588	1.29742		mU1	NR	0.074139	0.060659	0.222416	60.4194	31.7016	0.545455
					mU1	NR	9.09194	7.19095	1.63508		mU1	NR	0.056186	0.057924	0.231117	41.5088	20.0501	0.501253
					mU1	NR	9.77566	8.11554	1.30679		mU1	NR	0.067756	0.063163	0.202121	50.364	25	0.625
					mU1	NR	9.40161	7.74635	1.65525		mU1	NR	0.062854	0.061215	0.247044	20.6977	9.29204	0.495575
					mU1	NR	7.45444	5.91116	1.54328		mU1	NR	0.042899	0.039974	0.244718	52.4641	26.6932	0.326693
					mU1	NR	5.83433	4.38776	1.17047		mU1	NR	0.058398	0.044595	0.188467	64.8826	34.3662	0.47324
					mU1	NR	4.86811	3.70504	1.09113		mU1	NR	0.053012	0.042704	0.228244	41.2221	19.7849	0.374193
					mU1	NR	6.84054	5.23414	1.25667		mU1	NR	0.079753	0.061696	0.211673	43.6896	21.0901	0.582938
					mU1	NR	8.74892	6.61081	1.90118		mU1	NR	0.0756	0.085787	0.187659	38.5166	18	0.914286
					mU1	NR	10.788	7.8453	2.35534		mU1	NR	0.07891	0.072241	0.244509	44.1591	21.5909	0.590909
					mU1	NR	12.4071	9.56932	2.50738		mU1	NR	0.08569	0.042288	0.227578	38.9313	18.5819	0.371638
					mU1	NR	9.27882	7.30267	1.3799
Figure 3: Mitochondrial morphology
Genotype	Treatement	CO	CIOA	MS/C	RIMJL
Wt		3.2	2.8	2.4	1
Wt		4	3.8	2	0.515629
Wt		5	4.5	1.33333	0.928083
Wt		4.2	4.2	2.2	1.0611
Wt					0.520737
Wt	NR	3.4	2.8	3	0.337349
Wt	NR	3.375	3.375	2.3	0.304314
Wt	NR	3	2.33333	4	0.411311
Wt	NR	4	3.5	3.25	0.341812
Wt	NR	4	4	2.6	0.278564
mU1		1	1	2.5	0.562448
mU1		1	1	3	0.244292
mU1		2.7	2.7	2.7	0.427636
mU1		1.4	1.6	1.4	0.341812
mU1		2.5	2	3	0.366163
mU1	NR	2	1.5	3.25	0.375916
mU1	NR	2	2	1.5	0.578816
mU1	NR	1	1	4	0.46565
mU1	NR	1	1	2	0.152773
mU1	NR	0.9	0.9	3.3	0.445936
CO= Cristae organization
CIOA= Cristae inter-organelle alignement
MS/C= Mitochondrial shape/Cirularity
RIMJL= Relative IMJ lenght
Figure 5; Relative protein levels					Figure 5; NAM levels
Genotype	Treatement	AcK (400)	AcK (1000)		Genotype	Treatement	Heart	Liver
Wt		1	1		Wt		0.067824	0.059124
Wt		1.11651	0.700765		Wt		0.0525	0.058796
Wt		0.893773	0.566102		Wt		0.052846	0.064516
Wt			0.632729		Wt		0.0297	0.070177
Wt	NR	0.835063	0.746809		Wt		0.064067
Wt	NR	0.954307	0.898619		Wt		0.0297
Wt	NR	0.685714	0.696032		Wt	NR	0.011463	0.07867
Wt	NR		0.806558		Wt	NR	0.042182	0.103962
mU1		1.83333	1.78119		Wt	NR	0.013143	0.139969
mU1		1.99623	1.31972		Wt	NR	0.004875	0.109968
mU1		1.90218	1.27628		Wt	NR	0.058154
mU1	NR		2.91309		Wt	NR	0.03225
mU1	NR	1.90813	5.96388		mU1		0.018714	0.078968
mU1	NR	2.02437	4.03215		mU1		0.04432	0.059002
mU1	NR	1.92381	1.78938		mU1		0.035938	0.083697
					mU1	NR	0.0509167	0.09209
					mU1	NR	0.0565	0.090277
					mU1	NR	0.0478889	0.114458
					mU1	NR	0.0769524	0.108317
					mU1	NR	0.0538571
					mU1	NR	0.0573077
Figure 6; Relative PARP levels				Figure 6; Relative parylation levels				Figure 6; Relative AcK levels, increasing NR				Figure 6; Relative AcK levels, AZ				Figure 6; Relative SIRT3 levels, siRNA				Figure 6; Relative AcK levels, siRNA
Genotype	Treatement	PARP		Genotype	Treatement	parylation		Genotype	Treatement	AcK		Genotype	Treatement	AcK		Genotype	Treatement	SIRT3		Wt	Sc	1
Wt		1		Wt		1		Wt		1		Wt		1		Wt	Sc	1		Wt	Sc	54.5217
Wt	NR	1.12309			Az	0.074368			NR100	2.13726			Az	0.998813			siRNA	0.4904		Wt	Sc	8.67829
mU1		7.00703			NR500	1.20837			NR250	3.40457			NR500	11.6003		mU1	Sc	1.22846		Wt	Sc	66.4933
mU1	NR	16.3028			NR1000	0.647456			NR500	2.76326			Az+NR500	8.96846			siRNA	0.749648		mU1	Sc	4.73484
					Az NR500	0.022388			NR1000	4.11038		mU1		2.39744						mU1	Sc	61.1201
					Az NR1000	0.087308			NR2000	4.97138			Az	1.97544							siRNA	10.8405
				mU1		1.92968		mU1		2.86423			NR500	13.7068							siRNA	94.812
					Az	0.046671			NR100	2.45525			Az+NR500	5.83558
					NR500	2.04254			NR250	7.30572
					NR1000	2.07161			NR500	6.6021
					Az NR500	0.188983			NR1000	9.24433
					Az NR1000	0.128369			NR2000	15.9617
