# Supplementary material for: Instability in NAD+ metabolism leads to impaired cardiac mitochondrial function and communication
Source: eLife. 2021 Aug 3;10:e59828. doi: 10.7554/eLife.59828 (PMC8331182; doi:10.7554/eLife.59828)
Supplement: Source data 3. [file elife-59828-data3.xlsx]

## Sheet: Sheet1
Source data 3 - table 3
Figure 4 - supplement 1; Relative protein levels
Genotype	Treatement	MFN2	DRP1	PGC-1a
Wt		1	1	1
Wt		0.51227	0.62394	0.848995
Wt		0.575472	0.803764	0.600266
Wt	NR	0.57277	0.818155	1.84437
Wt	NR	0.553663	0.578704	1.08943
Wt	NR	0.511006	0.689748	1.1451
mU1		0.413638	0.706459	0.733368
mU1		0.366273	0.829149	0.976123
mU1		0.354452	0.958028	1.15576
mU1	NR	0.71452	1.64545	1.18031
mU1	NR	0.417553	0.841003	1.6085
mU1	NR	0.523766	1.0665	0.835638
Figure 4 - supplement 2; mtDNA copynumber
Genotype	Treatement	mtDNA
Wt		1
Wt		0.964006
Wt		0.995753
Wt	NR	0.978491
Wt	NR	0.989031
Wt	NR	1.00673
mU1		0.724252
mU1		0.726004
mU1		0.914733
mU1	NR	0.76064
mU1	NR	0.763659
mU1	NR	0.700814
Figure 4 - supplement 3; Mitochondrial respiration
Genotype	Treatement	Mito resp
Wt		140.162
Wt		149.05
Wt		169.91
Wt		156.179
Wt	NR	170.768
Wt	NR	161.146
Wt	NR	143.533
Wt	NR	115.498
mU1		142.81
mU1		146.408
mU1		81.8541
mU1	NR	126.348
mU1	NR	137.255
mU1	NR	122.166
mU1	NR	95.2838
Figure 5 - supplement 1; NAD+ levels
Genotype	Treatement	Heart
Wt		8.73866
Wt		15.444
Wt		13.5952
Wt		15.2628
Wt	NR	10.9281
Wt	NR	20.1328
Wt	NR	19.0066
Wt	NR	19.3429
mU1		15.2286
mU1		13.0128
mU1		7.53564
mU1	NR	11.1773
mU1	NR	15.0262
mU1	NR	22.6533
mU1	NR	13.981
Figure 5 - supplement 2; Relative AcK levels
Genotype	Treatement	Liver
Wt		1
Wt		0.775727
Wt		0.708904
Wt	NR	0.856933
Wt	NR	1.00456
Wt	NR	0.939963
mU1		1.03426
mU1		1.15693
mU1		1.05716
mU1	NR	0.656981
mU1	NR	0.605735
mU1	NR	1.04722
Figure 5 - supplement 3; Relative gene expression
Genotype	Treatement	NAMPT	NMAT1	NMAT2	NMAT3
Wt		1.16432	1	1	1
Wt		1.49188	0.847961	0.501171	0.684576
Wt		1.29235	0.722721	1.158	1.2285
Wt	NR	1.12825	0.931482	0.576724	0.842938
Wt	NR	1.95692	0.818764	0.665022	0.936999
Wt	NR	1.13468	0.692252	0.268951	0.661742
mU1		1.33176	0.472768	0.414194	0.740396
mU1		2.21253	0.608145	0.443604	0.831086
mU1		1.03114	0.920758	0.961082	0.938953
mU1	NR	2.36886	0.844505	0.522161	0.704611
mU1	NR	1.41785	0.848711	0.639883	0.854408
mU1	NR	2.18788	0.898417	0.536879	0.76126
Figure 5 - supplement 4; Relative Acetyl CoA levels
Genotype	Treatement	Ac CoA
Wt		1
Wt		1.59366
Wt		1.36664
Wt		0.90167
Wt	NR	0.9913
Wt	NR	0.967923
Wt	NR	1.15614
Wt	NR	1.3599
mU1		1.03523
mU1		1.05958
mU1		0.71107
mU1	NR	1.06996
mU1	NR	1.09484
mU1	NR	0.944997
